# Supplementary material
Source: publisher figshare collection journal article supplement (https://acs.figshare.com/ndownloader/files/13485455)
Supplement: Supplementary file 1 [file 13485455]

# Diastereoselective and Enantioselective Conjunctive Cross-Coupling Enabled by Boron Ligand Design

Jesse A. Myhill, Christopher A. Wilhelmsen, Liang Zhang, and James P. Morken\*

*Department of Chemistry, Merkert Chemistry Center, Boston College,  
Chestnut Hill, Massachusetts 02467*

## Supplementary Material

### Table of Contents

|                                                                                                         |       |
|---------------------------------------------------------------------------------------------------------|-------|
| <b>General Information</b> .....                                                                        | S-2   |
| <b>Experimental Procedures</b> .....                                                                    | S-3   |
| I. <i>Procedure for Preparation of 1,2-dimethyl-1,2-dihydroacenaphthylene-1,2-diol</i> .....            | S-3   |
| II. <i>Procedures for Preparation of Alkenyl Boronic Esters</i> .....                                   | S-3   |
| III. <i>Procedure for boron ‘ate’ complex NMR studies</i> .....                                         | S-11  |
| IV. <i>Representative procedure for Conjunctive Cross-Coupling</i> .....                                | S-13  |
| V. <i>Characterization of Conjunctive Cross-Coupling Products and Analysis of Stereochemistry</i> ..... | S-15  |
| VI. <i>Gram-scale Reaction and Transformations of Product</i> .....                                     | S-35  |
| VII. <i>Synthesis of (+)-Obtusafuran</i> .....                                                          | S-38  |
| <b>References</b> .....                                                                                 | S-40  |
| <b>Spectral Data</b> .....                                                                              | S-41  |
| <b>Crystallographic Data</b> .....                                                                      | S-117 |

## General Information

<sup>1</sup>H NMR spectra were recorded on either a Varian Gemini-500 (500 MHz), Varian Gemini-600 (600 MHz), or Varian Inova-500 (500 MHz) spectrometer. Chemical shifts are reported in ppm with the solvent resonance as the internal standard (CDCl<sub>3</sub>: 7.26 ppm). Data are reported as follows: chemical shift, integration, multiplicity (s = singlet, d = doublet, t = triplet, q = quartet, p = pentet, m = multiplet), and coupling constants (Hz). <sup>13</sup>C NMR spectra were recorded on either a Varian Gemini-500 (126 MHz), Varian Gemini-600 (151 MHz) or a Varian Inova-500 (126 MHz) spectrometer with complete proton decoupling. Chemical shifts are reported in ppm with the solvent resonance as the internal standard (CDCl<sub>3</sub>: 77.2 ppm). <sup>11</sup>B NMR spectra were recorded on a Varian Gemini-500 (128 MHz) or Varian Gemini-600 (160 MHz) spectrometer. <sup>19</sup>F NMR spectra were recorded on a Varian Gemini-500 (470 MHz) spectrometer. Infrared (IR) spectra were recorded on a Bruker alpha-P Spectrometer. Frequencies are reported in wavenumbers (cm<sup>-1</sup>) as follows: strong (s), broad (br), medium (m), and weak (w). Optical rotations were measured on a Rudolph Analytical Research Autopol IV Polarimeter. High-resolution mass spectrometry (DART) was performed at the Mass Spectrometry Facility, Boston College, Chestnut Hill, MA. Liquid chromatography was performed using forced flow (flash chromatography) on silica gel (SiO<sub>2</sub>, 230 x 450 Mesh) purchased from Silicycle. Thin layer chromatography (TLC) was performed on 25 µm silica gel glass backed plates from Silicycle. Visualization was performed using ultraviolet light (254 nm), ceric ammonium molybdate (CAM) in ethanol or phosphomolybdic acid, and cerium(IV) sulfate in ethanol with sulfuric acid (magic stain).

Analytical chiral supercritical fluid chromatography (SFC) was performed on a TharSFC Method Station II equipped with Waters 2998 Photodiode Array Detector with isopropanol or methanol as the modifier.

All reactions were conducted in oven- or flame-dried glassware under an inert atmosphere of nitrogen or argon. Tetrahydrofuran (THF), diethyl ether (Et<sub>2</sub>O), dichloromethane (DCM) and toluene were purified using Pure Solv MD-4 solvent purification system, from Innovative Technology, Inc., by passing the solvent through two activated alumina columns after purging with argon. Palladium (II) acetate, (*S<sub>p</sub>,S<sub>p</sub>*)-**L**, (*R<sub>p</sub>,R<sub>p</sub>*)-**L**, and 1,1'-Bis(diisopropylphosphino)ferrocene were purchased from Strem Chemicals, Inc. and used without further purification. 1,3-Bis(diphenylphosphino)propane was purchased from TCI and used without further purification. Acenaphthylene-1,2-dione, 4-methoxyphenyl trifluoromethanesulfonate, phenyl trifluoromethanesulfonate, and cesium fluoride were purchased from Oakwood Chemicals and used without further purification. Potassium trifluoromethanesulfonate was purchased from Oakwood Chemicals and dried by heating (100 °C) under vacuum overnight. Alkenyl boronic acids were prepared by hydroboration of alkynes with HBBBr<sub>2</sub> followed by hydrolysis.<sup>1</sup> All other reagents were purchased from Aldrich, Alfa Aesar, Acros, Combi Blocks, or Oakwood Chemicals and used without further purification.

## Experimental Procedures

### I. Procedure for Preparation of 1,2-dimethyl-1,2-dihydroacenaphthylene-1,2-diol (*mac*) (4)

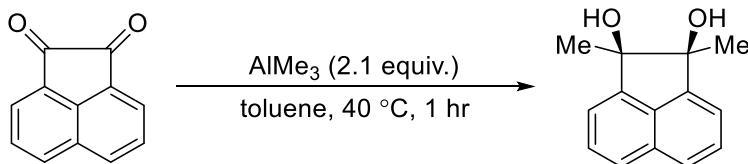

A flame-dried 3-neck 1000 mL RBF was equipped with stir bar, a reflux condenser fitted to the middle neck, and the other two necks were sealed with rubber septa. Acenaphthoquinone (18.22 g, 100 mmol) was added, and the flask was evacuated and backfilled with nitrogen. Dry toluene (100.0 mL, [substrate] = 1.00 M) was added via syringe, and the yellow suspension was stirred at  $40\text{ }^\circ\text{C}$ . Trimethyl aluminum (20.1 mL, 210.0 mmol, 2.1 equiv.) was added dropwise via syringe (a 12 mL syringe was used to transfer 5 mL aliquots dropwise). Upon completion of addition, the reaction was allowed to stir for 1 hour at  $40\text{ }^\circ\text{C}$ , then cooled to  $0\text{ }^\circ\text{C}$  and quenched very slowly with 40 mL  $\text{H}_2\text{O}$  and 20 mL 1M HCl (caution: gas evolution). The reaction was diluted with EtOAc and filtered through a frit funnel, then the filtrate was poured into separatory funnel containing water (200 mL). The organic layer was washed three times with EtOAc (300 mL) then the combined organic layers were washed 3 times with brine, then dried over  $\text{Na}_2\text{SO}_4$ , filtered, and concentrated.  $^1\text{H}$  NMR analysis of the crude material indicates ~4.3:1 syn:anti diol. The crude product was dissolved in hot EtOAc (750 mL) and stored at  $-20\text{ }^\circ\text{C}$  overnight. The resulting precipitate was collected by filtration and rinsed with pentane to yield *syn*-1,2-dimethyl-1,2-dihydroacenaphthylene-1,2-diol as off-white crystals (11.5 g, 53.7 mmol, 54% yield). Suspected losses in yield of product due to insolubility when transferring between vessels.  $^1\text{H}$  NMR (600 MHz,  $\text{CDCl}_3$ )  $\delta$  7.74 (d,  $J$  = 8.2 Hz, 2H), 7.56 (t,  $J$  = 7.5 Hz, 2H), 7.48 (d,  $J$  = 6.9 Hz, 2H), 2.97 (s, 2H), 1.63 (s, 6H).;  $^{13}\text{C}$  NMR (151 MHz,  $\text{CDCl}_3$ )  $\delta$  146.36, 134.51, 131.34, 128.68, 125.07, 119.33, 82.38, 23.53.; HRMS (DART) for  $\text{C}_{14}\text{H}_{13}\text{O}$   $[\text{M}+\text{H}-\text{H}_2\text{O}]^+$ : calculated: 197.0961, found: 197.0956.

### II. Procedures for Preparation of Alkenyl Boronic Esters

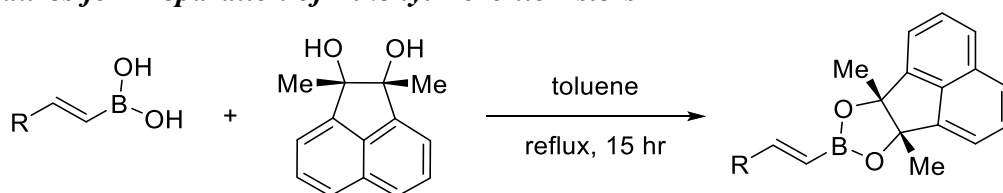

**Method A:** To a 100-mL RBF equipped with a stir bar was added alkenyl boronic acid (3.0 mmol, 1.0 equiv.) and toluene (12 mL). 1,2-Dimethylacenaphthylene-1,2-diol (3.0 mmol, 1.0 equiv.) was added and a Dean-Stark apparatus equipped with a reflux condenser was attached to the flask. The reaction was heated to reflux for 15 hours then concentrated under vacuum. The crude product was purified by silica gel chromatography to afford the desired product. *This method can be used to synthesis boronic esters containing other diol ligands.*

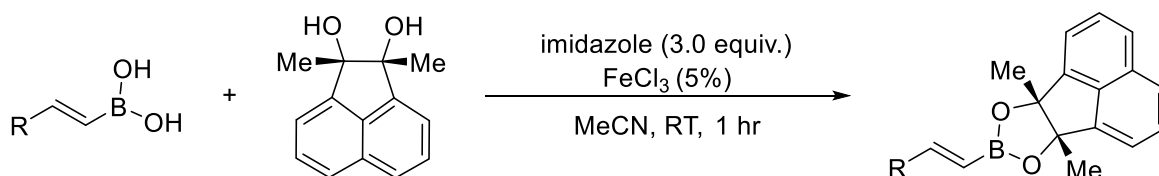

**Method B:** According to a modified literature procedure.<sup>2</sup> To a scintillation vial equipped with a stir bar was added alkenyl boronic acid (3.0 mmol, 1.0 equiv.) and MeCN (12.00 mL). To this solution was added sequentially 1,2-dimethylenaphthalene-1,2-diol (3.00 mmol, 1.0 equiv.), imidazole (9.00 mmol, 3 equiv.), and FeCl<sub>3</sub> (60.00 μmol, 0.05 equiv.). The reaction was then stirred at room temperature open to air for 1 hour before being filtered through a pad of silica gel with Et<sub>2</sub>O. The crude product was purified by silica gel chromatography to afford the desired product. *This method can be used to synthesis boronic esters containing other diol ligands.*

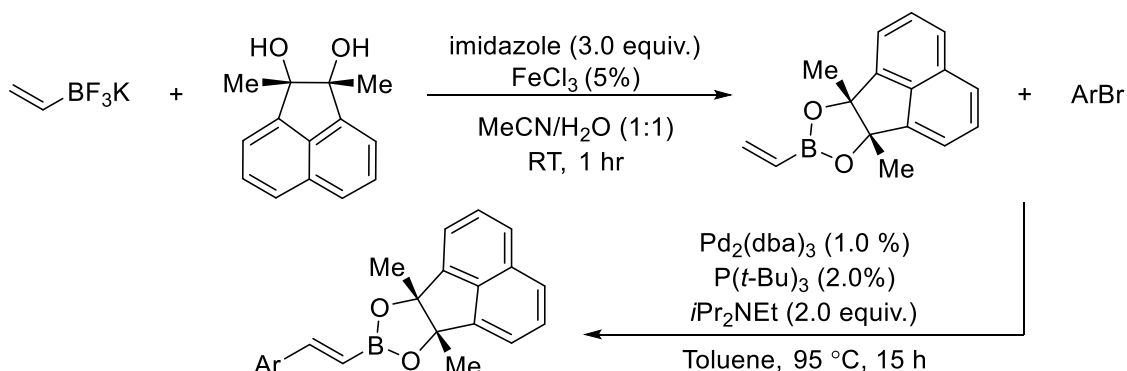

**Method C:** VinylB(mac) was prepared according to a modified literature procedure, as follows.<sup>2</sup> To a solution of vinyl potassium trifluoroborate (343.9 mg, 2.57 mmol, 1.0 equiv.) in 50% acetonitrile/water (5 mL) was added sequentially open to air at room temperature, 1,2-dimethylenaphthalene-1,2-diol (550 mg, 2.57 mmol, 1.0 equiv.), imidazole (524.3 mg, 7.70 mmol, 3.0 equiv.), and FeCl<sub>3</sub> (20.8 mg, 0.128 mmol, 0.05 equiv.). The reaction was allowed to stir 30 minutes, then filtered through a plug of silica gel with Et<sub>2</sub>O and concentrated. The crude material was purified by silica gel column chromatography to afford the desired product (typically 90% yield). The Heck reaction was carried out according to a modified literature procedure.<sup>3</sup> In an argon-filled glovebox, vinylB(mac) (750.30 mg, 3 mmol, 1.0 equiv.), aryl bromide (3.30 mmol, 1.1 equiv.), N,N-diisopropylethylamine (1.05 mL, 6.00 mmol, 2.0 equiv.), tris(dibenzylideneacetone)dipalladium(0) (27.47 mg, 30.00 μmol, 1.0 mol%), tri-*tert*-butylphosphine (10% weight in hexanes, 121.39 mg, 60.00 μmol, 2.0 mol%), and toluene (6.00 mL) were added to an oven-dried scintillation vial equipped with a stir-bar. The vial was sealed and removed from the glovebox. The reaction was then heated to 95 °C overnight, filtered through a plug of silica gel with Et<sub>2</sub>O, and concentrated. The crude product was purified by column chromatography with silica gel. *This method can be used to synthesis boronic esters containing other diol ligands.*

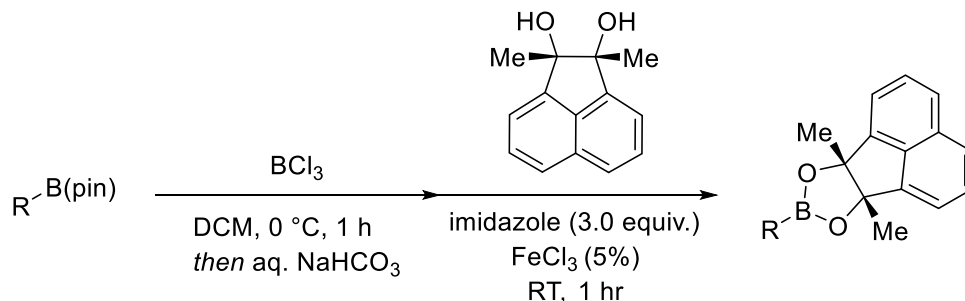

**Method D:** Boron trichloride (1 M solution in DCM, 17.5 mL, 17.5 mmol, 5.0 equiv.) was added to a solution of boronic acid pinacol ester (3.5 mmol, 1.0 equiv.) in DCM (3.50 mL) at – 78 °C.

The mixture was stirred at 0 °C for 1 hour, then quenched with saturated aqueous sodium bicarbonate solution (3.5 mL), and the reaction was warmed to room temperature. To this solution was added 1,2-dimethylnaphthalene-1,2-diol (3.5 mmol, 1.0 equiv.), imidazole (10.5 mmol, 3.0 equiv.), and FeCl<sub>3</sub> (0.18 mmol, 0.05 equiv.). The reaction was stirred for 1 hour at room temperature then filtered through a plug of silica gel with Et<sub>2</sub>O and concentrated. The crude product was purified by column chromatography with silica gel. *This method can be used to synthesis boronic esters containing other diol ligands.*

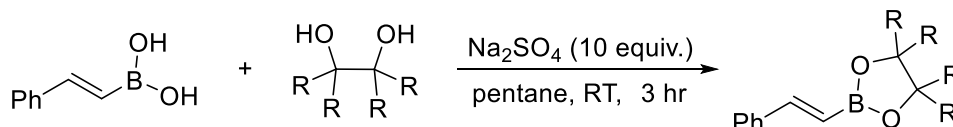

**Method E:** To a 100-mL RBF equipped with a stir bar was added alkenyl boronic acid (3.0 mmol, 1.0 equiv.) and pentane (12 mL, 0.25 M). The diol (3.0 mmol, 1.0 equiv.) was added followed by anhydrous sodium sulfate (30 mmol, 10.0 equiv.). The reaction was allowed to stir at room temperature for 3 hours, then the reaction mixture was filtered through a cotton plug with Et<sub>2</sub>O and concentrated. The crude product was purified by silica gel chromatography to afford the desired product.

#### When to Use Each Method:

In instances when boronic acids or potassium trifluoroborates are readily available, Method B is preferred due to operational simplicity, reaction efficiency, and simple product purification. However, if the substrate contains acid-sensitive functionality then Method A or Method E should be used instead. Additionally, if the resulting boronic ester is not stable to silica gel chromatography, then Method E is preferred. In instances when a pinacol boronic ester is more easily obtained than the corresponding boronic acid, Method D is utilized (this method should be avoided if the substrate contains acid-sensitive functionality). Method B is utilized for the synthesis of styrenyl boronic esters as an alternative to the hydroboration of terminal alkynes.

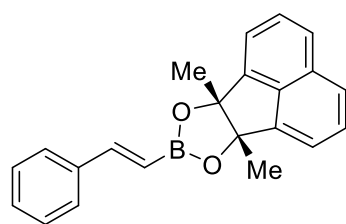

solid.

**6b,9a-dimethyl-8-((E)-styryl)-6b,9a-dihydroacenaphtho[1,2-d][1,3,2]dioxaborole (S-1).** The title compound was prepared according to Method A with [(E)-styryl]boronic acid (500 mg, 3.38 mmol, 1.0 equiv.), 1,2-dimethylnaphthalene-1,2-diol (723 mg, 3.38 mmol, 1.0 equiv.), and toluene (15 mL). The crude product was purified by silica gel chromatography with 5-10% EtOAc / hexane to yield the title compound (1.05 g, 3.21 mmol, 95% yield) as a white

The title compound was prepared according to Method B with [(E)-styryl]boronic acid (443.90 mg, 3 mmol, 1.0 equiv.), MeCN (12 mL), FeCl<sub>3</sub> (24.33 mg, 150 μmol, 0.05 equiv), imidazole (612.72 mg, 9.00 mmol, 3.0 equiv.), and 1,2-dimethylnaphthalene-1,2-diol (642.78 mg, 3.00 mmol, 1.0 equiv.). The crude product was purified by silica gel chromatography with 5-10% EtOAc / hexane to yield the title compound (881 mg, 2.70 mmol, 90% yield) as a white solid. <sup>1</sup>H

NMR (500 MHz,  $\text{CDCl}_3$ )  $\delta$  7.80 (dd,  $J$  = 6.9, 2.1 Hz, 2H), 7.67 – 7.57 (m, 4H), 7.42 (d,  $J$  = 7.2 Hz, 2H), 7.36 (d,  $J$  = 18.4 Hz, 1H), 7.33 – 7.23 (m, 3H), 6.10 (d,  $J$  = 18.4 Hz, 1H), 1.85 (s, 6H);  $^{13}\text{C}$  NMR (151 MHz,  $\text{CDCl}_3$ )  $\delta$  152.4, 147.4, 140.1, 137.4, 134.1, 131.5, 131.2, 131.2, 129.7, 128.0, 122.2, 94.7, 79.9, 79.7, 79.5, 24.8;  $^{11}\text{B}$  NMR: (160 MHz,  $\text{CDCl}_3$ )  $\delta$  30.3; IR (neat)  $\nu_{\text{max}}$  3024.6 (w), 2972.4 (w), 2932.9 (w), 1622.7 (s), 1450.0 (m), 1433.7 (m), 1313.1 (s), 1139.6 (s), 788.5 (m), 480.5 (m)  $\text{cm}^{-1}$ . HRMS (DART) for  $\text{C}_{22}\text{H}_{20}\text{BO}_2$   $[\text{M}+\text{H}]^+$  calculated: 327.1556, found: 327.1543.

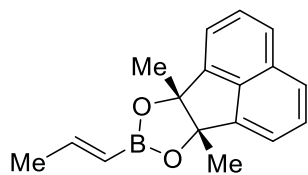

**6b,9a-dimethyl-8-((E)-prop-1-en-1-yl)-6b,9a-dihydroacenaphtho[1,2-d][1,3,2]dioxaborole (S-2).**

The title compound was prepared according to Method B with [(E)-prop-1-en-1-yl]boronic acid (379 mg, 4.41 mmol, 1.0 equiv.), MeCN (11 mL), 1,2-dimethylacenaphthylene-1,2-diol (1.35 g, 4.41 mmol, 1.0 equiv.), imidazole (901 mg, 13.2 mmol, 3.0 equiv.), and  $\text{FeCl}_3$  (36 mg, 221  $\mu\text{mol}$ , 0.05 equiv.). The crude product was purified by silica gel chromatography with 5-10% EtOAc / hexane to yield the title compound (1.12 g, 4.24 mmol, 96% yield) as a white solid.  $^1\text{H}$  NMR (500 MHz,  $\text{CDCl}_3$ )  $\delta$  7.79 (d,  $J$  = 8.1 Hz, 2H), 7.65 – 7.52 (m, 4H), 6.69 – 6.56 (m, 1H), 5.40 (d,  $J$  = 17.8 Hz, 1H), 1.84 – 1.74 (m, 9H).  $^{13}\text{C}$  NMR (126 MHz,  $\text{CDCl}_3$ )  $\delta$  149.98, 144.8, 134.7, 131.3, 128.4, 125.2, 119.4, 91.7, 22.1, 21.6.  $^{11}\text{B}$  NMR: (160 MHz,  $\text{CDCl}_3$ )  $\delta$  29.9; IR (neat)  $\nu_{\text{max}}$  3044.5 (w), 2973.6 (m), 2933.7 (w), 1639.4 (s), 1347.6 (m), 1214.4 (m), 1077.7 (m), 777.8 (m)  $\text{cm}^{-1}$ . HRMS (DART) for  $\text{C}_{17}\text{H}_{18}\text{BO}_2$   $[\text{M}+\text{H}]^+$  calculated: 265.1400, found: 265.1393.

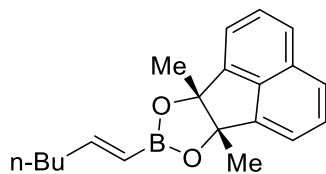

**8-((E)-hex-1-en-1-yl)-6b,9a-dimethyl-6b,9a-dihydroacenaphtho[1,2-d][1,3,2]dioxaborole (S-3).**

The title compound was prepared according to Method B with [(E)-hex-1-en-1-yl]boronic acid (213 mg, 1.67 mmol, 1.0 equiv.), MeCN (6.7 mL), 1,2-dimethylacenaphthylene-1,2-diol (357 g, 1.67 mmol, 1.0 equiv.), imidazole (340 mg, 5.00 mmol, 3.0 equiv.), and  $\text{FeCl}_3$  (13.5 mg, 83  $\mu\text{mol}$ , 0.05 equiv.). The crude product was purified by silica gel chromatography with 5-10% EtOAc / hexane to yield the title compound (465 mg, 1.52 mmol, 91% yield) as a yellow oil which solidified upon standing.  $^1\text{H}$  NMR (500 MHz,  $\text{CDCl}_3$ )  $\delta$  7.79 (dd,  $J$  = 7.9, 1.1 Hz, 2H), 7.65 – 7.51 (m, 4H), 6.61 (dt,  $J$  = 18.0, 6.5 Hz, 1H), 5.38 (d,  $J$  = 17.9 Hz, 1H), 2.14 – 2.06 (m, 2H), 1.81 (s, 6H), 1.41 – 1.21 (m, 4H), 0.85 (t,  $J$  = 7.2 Hz, 3H);  $^{13}\text{C}$  NMR (126 MHz,  $\text{CDCl}_3$ )  $\delta$  155.0, 144.9, 134.7, 131.3, 128.4, 125.2, 119.4, 91.7, 35.4, 30.3, 22.2, 22.1, 13.9.  $^{11}\text{B}$  NMR: (160 MHz,  $\text{CDCl}_3$ )  $\delta$  30.0; IR (neat)  $\nu_{\text{max}}$  3045.2 (w), 2956.9 (m), 2928.2 (m), 2856.8 (w), 1638.0 (m), 1355.2 (m), 1310.6 (m), 1116.4 (m), 1078.4 (m), 805.8  $\text{cm}^{-1}$ . HRMS (DART) for  $\text{C}_{20}\text{H}_{24}\text{BO}_2$   $[\text{M}+\text{H}]^+$  calculated: 307.1869, found: 307.1882.

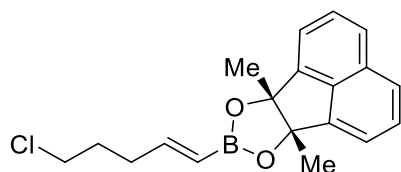

**8-((E)-5-chloropent-1-en-1-yl)-6b,9a-dimethyl-6b,9a-dihydroacenaphtho[1,2-d][1,3,2]dioxaborole (S-4).**

The title compound was prepared according to Method B with (E)-(5-chloropent-1-en-1-yl) boronic acid (367 mg, 2.46 mmol, 1.0 equiv.), MeCN (13 mL), 1,2-dimethylacenaphthylene-1,2-diol (527 mg, 2.46 mmol, 1.0 equiv.), imidazole (503 mg, 7.39 mmol, 3.0 equiv.), and  $\text{FeCl}_3$  (20 mg, 123  $\mu\text{mol}$ , 0.05 equiv.). The crude product was purified by silica gel chromatography with 5-10% EtOAc / hexane to yield the title compound (530 mg, 1.62 mmol, 66% yield) as a white solid.  $^1\text{H}$  NMR (500 MHz,  $\text{CDCl}_3$ )  $\delta$  7.79 (dt,  $J$  = 8.0, 1.1 Hz, 2H), 7.63 –

7.53 (m, 4H), 6.59 – 6.50 (m, 1H), 5.42 (dq,  $J = 17.9, 1.5$  Hz, 1H), 3.50 – 3.45 (m, 2H), 2.28 – 2.21 (m, 2H), 1.88 – 1.81 (m, 2H), 1.80 (s, 6H).  $^{13}\text{C}$  NMR (151 MHz,  $\text{CDCl}_3$ )  $\delta$  152.5, 144.9, 134.8, 131.5, 128.6, 125.4, 119.6, 91.9, 44.4, 32.8, 31.0, 22.2.  $^{11}\text{B}$  NMR: (160 MHz,  $\text{CDCl}_3$ )  $\delta$  29.73; IR (neat)  $\nu_{\text{max}}$  3042.8 (w), 2975.0 (w), 2933.3 (w), 1637.7 (m), 1347.5 (m), 1311.14 (m), 1114.9 (m), 1076.1 (m), 825.3 (m), 777.6 (s), 640.4 (m)  $\text{cm}^{-1}$ . HRMS (DART) for  $\text{C}_{19}\text{H}_{20}\text{BClO}_2$   $[\text{M}+\text{H}]^+$  calculated: 327.1323, found: 327.1334.

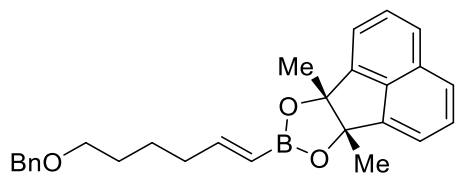

**8-((E)-6-(benzyloxy)hex-1-en-1-yl)-6b,9a-dimethyl-6b,9a-dihydroacenaphtho[1,2-d][1,3,2]dioxaborole (S-5).**

The title compound was prepared according to Method B with (E)-(6-(benzyloxy)hex-1-en-1-yl)boronic acid (497 mg, 2.12 mmol, 1.0 equiv.), MeCN (13 ml), 1,2-dimethylacenaphthylene-1,2-diol (453 mg, 2.12 mmol, 1.0 equiv.), imidazole (433 mg, 6.37 mmol, 3.0 equiv.) and  $\text{FeCl}_3$  (17.2 mg, 106  $\mu\text{mol}$ , 0.05 equiv.). The crude product was purified by silica gel chromatography with 5-10% EtOAc / hexane to yield the title compound (629 mg, 1.53 mmol, 72% yield) as a thick, colorless oil.  $^1\text{H}$  NMR (500 MHz,  $\text{CDCl}_3$ )  $\delta$  7.82 – 7.76 (m, 2H), 7.63 – 7.54 (m, 4H), 7.39 – 7.26 (m, 5H), 6.65 – 6.55 (m, 1H), 5.42 – 5.35 (m, 1H), 4.47 (s, 2H), 3.46 – 3.40 (m, 2H), 2.16 – 2.07 (m, 2H), 1.81 (s, 6H), 1.64 – 1.53 (m, 2H), 1.51 – 1.42 (m, 2H).  $^{13}\text{C}$  NMR (151 MHz,  $\text{CDCl}_3$ )  $\delta$  154.5, 144.9, 138.7, 134.7, 131.4, 128.5, 128.4, 127.6, 127.5, 125.3, 119.5, 91.7, 72.9, 70.2, 35.5, 29.3, 24.8, 22.2.  $^{11}\text{B}$  NMR: (160 MHz,  $\text{CDCl}_3$ )  $\delta$  29.94; IR (neat)  $\nu_{\text{max}}$  3031.0 (w), 2972.4 (w), 2932.6 (w), 2855.4 (w), 1637.1 (m), 1354.9 (m), 1339.4 (m), 1114.4 (m), 1076.0 (m), 805.8 (m), 777.9 (m), 733.4 (m), 696.6 (m), 641.8 (m)  $\text{cm}^{-1}$ . HRMS (DART) for  $\text{C}_{27}\text{H}_{29}\text{BO}_3$   $[\text{M}+\text{H}]^+$  calculated: 413.2288, found: 413.2304.

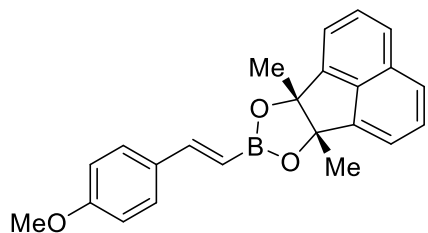

**8-((E)-4-methoxystyryl)-6b,9a-dimethyl-6b,9a-dihydroacenaphtho[1,2-d][1,3,2]dioxaborole (S-6).**

The title compound was prepared according to Method B with [(E)-2-(4-methoxyphenyl)vinyl]boronic acid (186 mg, 1.04 mmol, 1.0 equiv.), MeCN (4.2 mL), 1,2-dimethylacenaphthylene-1,2-diol (223.49 mg, 1.04 mmol, 1.0 equiv.), imidazole (213 mg, 3.13 mmol, 3.0 equiv.), and  $\text{FeCl}_3$  (8.5 mg, 52.2  $\mu\text{mol}$ , 0.05 equiv.). The crude product was purified by silica gel chromatography with 5-10% EtOAc / hexane to yield the title compound (353 mg, 0.99 mmol, 95% yield) as a white solid.  $^1\text{H}$  NMR (500 MHz,  $\text{CDCl}_3$ )  $\delta$  7.80 (dd,  $J = 6.7, 2.2$  Hz, 2H), 7.65 – 7.56 (m, 4H), 7.40 – 7.35 (m, 2H), 7.32 (d,  $J = 18.4$  Hz, 1H), 6.83 (d,  $J = 8.5$  Hz, 2H), 5.95 (d,  $J = 18.3$  Hz, 1H), 3.79 (s, 3H), 1.85 (s, 6H).;  $^{13}\text{C}$  NMR (126 MHz,  $\text{CDCl}_3$ )  $\delta$  160.2, 149.2, 144.78, 134.7, 131.4, 130.3, 128.5, 128.4, 125.3, 119.4, 113.9, 91.9, 55.2, 22.1.  $^{11}\text{B}$  NMR: (160 MHz,  $\text{CDCl}_3$ )  $\delta$  31.0.; IR (neat)  $\nu_{\text{max}}$  3041.3 (w), 2972.0 (w), 2932.7 (w), 2836.1 (w), 1623.7 (m), 1603.1 (m), 1509.4 (m), 1312.9 (m), 1252.7 (m), 1116.0 (m), 1077.2 (m), 815.7 (m)  $\text{cm}^{-1}$ . HRMS (DART) for  $\text{C}_{23}\text{H}_{22}\text{BO}_3$   $[\text{M}+\text{H}]^+$  calculated: 357.1662, found: 357.1664.

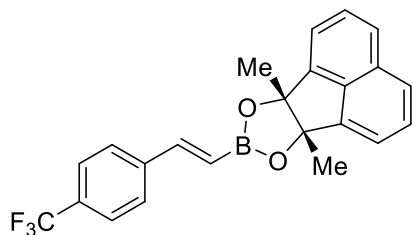

**6b,9a-dimethyl-8-((E)-4-(trifluoromethyl)styryl)-6b,9a-dihydroacenaphtho[1,2-d][1,3,2]dioxaborole (S-7).** The title compound was prepared according to Method B with [(E)-2-[4-(trifluoromethyl)phenyl]vinyl]boronic acid (164 mg, 0.76 mmol, 1.0 equiv.), MeCN (3.0 mL), 1,2-dimethylacenaphthylene-1,2-diol (163 mg, 0.76 mmol, 1.0 equiv.), imidazole (155 mg, 2.28 mmol, 3.0 equiv.), and FeCl<sub>3</sub> (6.2 mg, 38 μmol). The crude product was purified by silica gel chromatography with 5-10% EtOAc / hexane to yield the title compound (276 mg, 0.70 mmol, 92% yield) as a white solid. <sup>1</sup>H NMR (500 MHz, CDCl<sub>3</sub>) δ 7.82 (dt, J = 7.2, 1.6 Hz, 2H), 7.70 – 7.59 (m, 4H), 7.56 (d, J = 8.1 Hz, 2H), 7.50 (d, J = 8.2 Hz, 2H), 7.37 (d, J = 18.3 Hz, 1H), 6.20 (d, J = 18.4 Hz, 1H), 1.87 (s, 6H).; <sup>13</sup>C NMR (126 MHz, CDCl<sub>3</sub>) δ 147.8, 144.5, 140.7, 134.7, 131.4, 130.4 (q, <sup>2</sup>J<sub>C-F</sub> = 32.4 Hz), 128.5, 127.1, 125.5 (q, <sup>3</sup>J<sub>C-F</sub> = 3.8 Hz), 125.4, 124.1 (partially buried, q, <sup>1</sup>J<sub>C-F</sub> = 271.8 Hz), 119.5, 92.2, 29.7, 22.1. <sup>11</sup>B NMR: (160 MHz, CDCl<sub>3</sub>) δ 30.3.; <sup>19</sup>F NMR (470 MHz, CDCl<sub>3</sub>) δ 62.7.; IR (neat) ν<sub>max</sub> 3045.7 (w), 2974.7 (w), 2929.0 (w), 1626.9 (m), 1457.6 (m), 1415.8 (m), 1263.2 (m), 1210.6 (m), 825.1 (m), 778.6 (m) cm<sup>-1</sup>. HRMS (DART) for C<sub>23</sub>H<sub>19</sub>BO<sub>2</sub>F<sub>3</sub> [M+H]<sup>+</sup>: calculated: 395.1430, found: 395.1441.

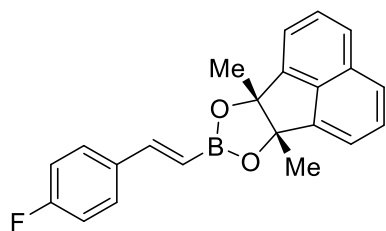

**8-((E)-4-fluorostyryl)-6b,9a-dimethyl-6b,9a-dihydroacenaphtho[1,2-d][1,3,2]dioxaborole (S-8).** The title compound was prepared according to Method B with [(E)-2-(4-fluorophenyl)vinyl]boronic acid (277 mg, 1.67 mmol, 1.0 equiv.), MeCN (6.67 mL), 1,2-dimethylacenaphthylene-1,2-diol (357 mg, 1.67 mmol, 1.0 equiv.), imidazole (304 mg, 5.00 mmol, 3.0 equiv.), and FeCl<sub>3</sub> (14 mg, 83.3 μmol, 0.05 equiv.). The crude product was purified by silica gel chromatography with 5-10% EtOAc / hexane to yield the title compound (535 mg, 1.55 mmol, 93% yield) as a white solid. <sup>1</sup>H NMR (500 MHz, CDCl<sub>3</sub>) δ 7.81 (dd, J = 7.1, 1.8 Hz, 2H), 7.66 – 7.56 (m, 4H), 7.46 – 7.36 (m, 2H), 7.32 (d, J = 18.4 Hz, 1H), 7.05 – 6.92 (m, 2H), 6.01 (d, J = 18.4 Hz, 1H), 1.85 (s, 6H).; <sup>13</sup>C NMR (126 MHz, CDCl<sub>3</sub>) δ 163.1 (d, <sup>1</sup>J<sub>C-F</sub> = 248.5 Hz), 148.3, 144.7, 134.7, 133.7, 133.6, 131.4, 128.6 (d, <sup>3</sup>J<sub>C-F</sub> = 8.2 Hz), 128.5, 125.3, 119.5, 115.5 (d, <sup>2</sup>J<sub>C-F</sub> = 21.6 Hz), 92.0, 22.1. <sup>11</sup>B NMR: (160 MHz, CDCl<sub>3</sub>) δ 30.1; <sup>19</sup>F NMR: (470 MHz, CDCl<sub>3</sub>) δ -112.41; IR (neat) ν<sub>max</sub> 3045.2 (w), 2976.5 (m), 2933.9 (w), 1620.8 (m), 1506.5 (m), 1415.7 (m), 1156.6 (m), 904.0 (m), 778.7 (m) cm<sup>-1</sup>. HRMS (DART) for C<sub>22</sub>H<sub>19</sub>BO<sub>2</sub>F [M+H]<sup>+</sup>: calculated: 345.1462, found: 345.1470.

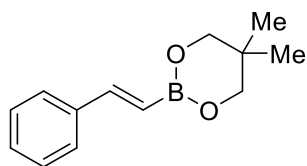

**(E)-5,5-dimethyl-2-styryl-1,3,2-dioxaborinane (S-9).** The title compound was prepared according to Method E using neopentyl glycol (208 mg, 2.00 mmol, 1 equiv.), (E)-styrylboronic acid (296 mg, 2.00 mmol, 1.0 equiv.), and pentane (20 mL). The crude product was purified by silica gel chromatography with 10% EtOAc / hexanes to yield the title compound (278 mg, 1.29 mmol, 64% yield) as a white solid. Spectral data are in accordance with the literature.<sup>4</sup>



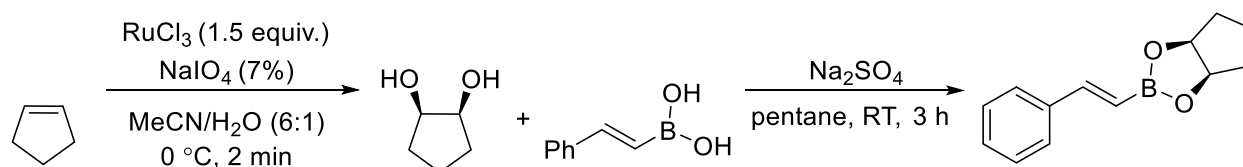

**(E)-2-styryltetrahydro-4H-cyclopenta[d][1,3,2]dioxaborole (S-10).** The title compound was prepared according to Method E using *syn*-cyclopentane-1,2-diol (prepared using a literature procedure<sup>5</sup>) (109 mg, 1.07 mmol, 1 equiv.) with (E)-styrylboronic acid (158.3 mg, 1.07 mmol, 1 equiv.) and pentane (4 mL). The mixture was allowed to stir overnight in a sealed vial at room temperature. The crude product was purified by silica gel chromatography with 10% EtOAc: hexanes to yield the title compound (174 mg, 0.812 mmol, 76%) as a colorless oil. <sup>1</sup>H NMR (500 MHz, CDCl<sub>3</sub>) δ 7.52 – 7.47 (m, 2H), 7.40 (d, *J* = 18.5 Hz, 1H), 7.37 – 7.32 (m, 2H), 7.32 – 7.28 (m, 1H), 6.17 (d, *J* = 18.5 Hz, 1H), 4.97 – 4.86 (m, 2H), 2.03 – 1.94 (m, 2H), 1.74 – 1.55 (m, 4H). <sup>13</sup>C NMR (126 MHz, CDCl<sub>3</sub>) δ 149.9, 137.6, 129.1, 128.7, 127.2, 82.5, 34.9, 21.7. <sup>11</sup>B NMR (160 MHz, CDCl<sub>3</sub>) δ 30.2.; IR (neat)  $\nu_{\text{max}}$  3025.0 (w), 2960.5 (w), 1622.4 (m), 1357.7 (s), 1032.5 (m), 746.8 (s) cm<sup>-1</sup>. HRMS (DART) for C<sub>13</sub>H<sub>16</sub>BO<sub>2</sub> [M+H]<sup>+</sup> calculated: 215.1243, found: 215.1252.

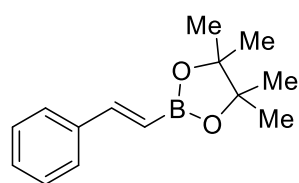

**(E)-4,4,5,5-tetramethyl-2-styryl-1,3,2-dioxaborolane (S-11).** The title compound was prepared according to a literature procedure<sup>6</sup> using phenylacetylene (2.14 mg, 21.00 mmol, 1.05 equiv.), pinacolborane (2.56 g, 20.0 mmol, 1.0 equiv.) and Bis(cyclopentadienyl)zirconium(IV) chloride hydride (258 mg, 1 mmol, 0.05 equiv.). The crude product was purified by silica gel chromatography with 5-10% EtOAc / hexanes to yield the title compound (4.25 mg, 18.4 μmol, 92% yield) as a white solid. Spectral data are in accordance with the literature.<sup>7</sup>

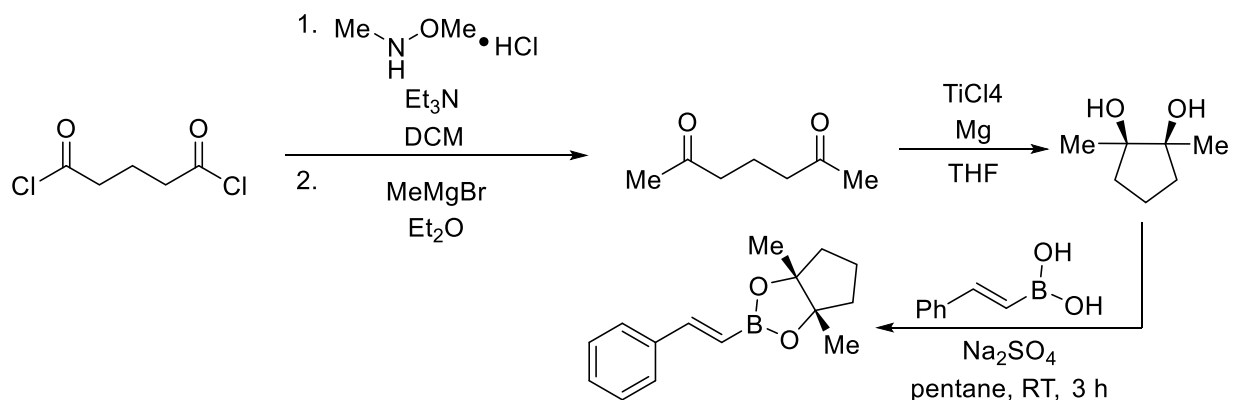

**(E)-3a,6a-dimethyl-2-styryltetrahydro-4H-cyclopenta[d][1,3,2]dioxaborole (S-12).** The title compound was prepared according to a series of literature reactions<sup>8,9</sup>, then Method E using the *cis*-1,2-dimethylcyclopentane-1,2-diol (38.6 mg, 296 μmol, 1.0 equiv.) with (E)-styrylboronic acid (43.9 mg, 296 μmol, 1.0 equiv.), and pentane (1 mL). The crude product was purified by silica gel chromatography with 10% EtOAc / hexanes to yield the title compound as a colorless oil. <sup>1</sup>H NMR (600 MHz, CDCl<sub>3</sub>) δ 7.51 – 7.46 (m, 2H), 7.40 – 7.27 (m, 4H), 6.15 (d, *J* = 18.4 Hz, 1H), 2.05 (dd, *J* = 12.9, 5.5 Hz, 2H), 1.69 – 1.50 (m, 4H), 1.37 (s, 6H). <sup>13</sup>C NMR (151 MHz, CDCl<sub>3</sub>) δ 149.4, 137.7, 129.0, 128.7, 127.2, 90.6, 42.0, 23.4, 21.4. <sup>11</sup>B NMR (160 MHz, CDCl<sub>3</sub>) δ 29.7.; IR (neat)  $\nu_{\text{max}}$  2966.4 (w), 1623.2 (m), 1353.0 (s). HRMS (DART) for C<sub>15</sub>H<sub>19</sub>BO<sub>2</sub> [M+H]<sup>+</sup> calculated: 243.1556, found: 243.1563.

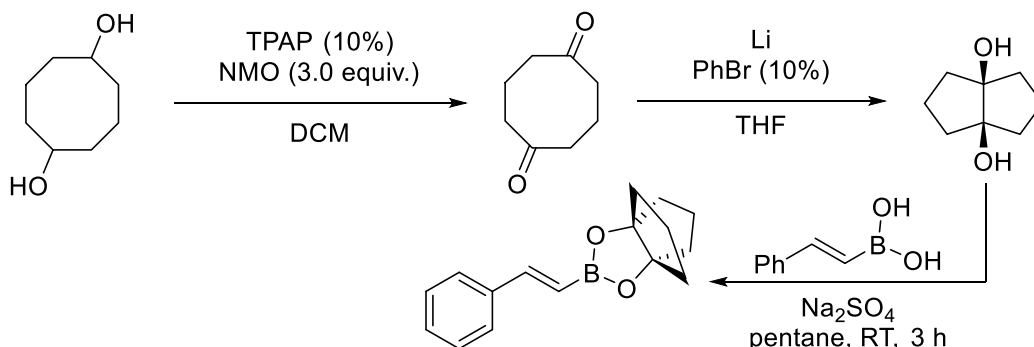

**8-((E)-styryl)tetrahydro-1H,4H-3a,6a-(epoxyboranooxy)pentalene (S-13).** The title compound was prepared according to Method E with (E)-styrylboronic acid (70.5 mg, 477  $\mu$ mol, 1.0 equiv.), tetrahydropentalene-3a,6a(1H,4H)-diol (67 mg, 477  $\mu$ mol, 1.0 equiv.) and 1 mL of pentane. The crude product was purified by silica gel chromatography with 5% EtOAc / hexanes to the yield the title compound (121.1 mg, 338  $\mu$ mol, 71% yield) as a colorless oil.  $^1\text{H}$  NMR (600 MHz,  $\text{CDCl}_3$ )  $\delta$  7.51 – 7.47 (m, 2H), 7.39 (d,  $J$  = 18.4 Hz, 1H), 7.34 (t,  $J$  = 7.5 Hz, 2H), 7.29 (t,  $J$  = 7.3 Hz, 1H), 6.15 (d,  $J$  = 18.4 Hz, 1H), 2.02 – 1.96 (m, 4H), 1.87 – 1.78 (m, 2H), 1.75 – 1.61 (m, 6H).  $^{13}\text{C}$  NMR (126 MHz,  $\text{CDCl}_3$ )  $\delta$  149.6, 137.6, 129.0, 128.7, 127.2, 99.8, 39.0, 25.0.  $^{11}\text{B}$  NMR (160 MHz,  $\text{CDCl}_3$ )  $\delta$  30.7.; IR (neat)  $\nu_{\text{max}}$  3025.0 (w), 2960.5 (w), 1622.4 (m), 1357.7 (s), 1032.5 (m), 746.8 (m). HRMS (DART) for  $\text{C}_{16}\text{H}_{19}\text{BO}_2$   $[\text{M}+\text{H}]^+$  calculated: 255.1556 found: 255.1552.

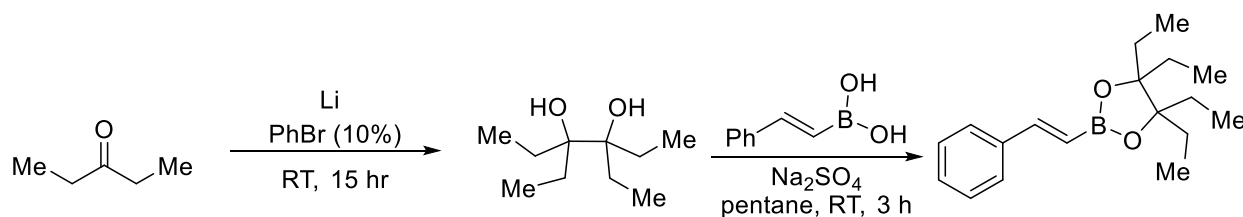

**(E)-4,4,5,5-tetraethyl-2-styryl-1,3,2-dioxaborolane (S-14).** The title compound was prepared according to Method E using 3,4-diethylhexane-3,4-diol (prepared according to a literature procedure<sup>10</sup>) (79.5 mg, 0.46 mmol, 1.0 equiv.), (E)-styrylboronic acid (67.5 mg, 0.46 mmol, 1.0 equiv.) and pentane (1.5 mL). The crude product was purified by silica gel chromatography with 10% EtOAc / hexanes to yield the title compound (115 mg, 0.40 mmol, 88%) as a white solid.  $^1\text{H}$  NMR (600 MHz,  $\text{CDCl}_3$ )  $\delta$  7.53 – 7.48 (m, 2H), 7.41 (d,  $J$  = 18.4 Hz, 1H), 7.36 – 7.32 (m, 2H), 7.31 – 7.27 (m, 1H), 6.20 (d,  $J$  = 18.3 Hz, 1H), 1.80 – 1.67 (m, 8H), 0.96 (t,  $J$  = 7.5 Hz, 12H).  $^{13}\text{C}$  NMR (126 MHz,  $\text{CDCl}_3$ )  $\delta$  149.4, 137.8, 128.9, 128.7, 127.2, 88.5, 26.6, 9.0.  $^{11}\text{B}$  NMR (192 MHz,  $\text{CDCl}_3$ )  $\delta$  29.1.; IR (neat)  $\nu_{\text{max}}$  2975.3 (w), 2973.5 (w), 2882.9 (w), 1624.2 (m), 1346.2 (s)  $\text{cm}^{-1}$ . HRMS (DART) for  $\text{C}_{18}\text{H}_{27}\text{BO}_2$   $[\text{M}+\text{H}]^+$  calculated: 287.2182, found: 287.2189.

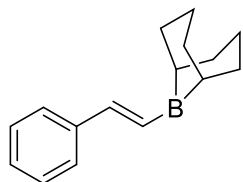

**(E)-9-styryl-9-borabicyclo[3.3.1]nonane (S-15).** In an argon-filled glovebox, to an oven-dried scintillation vial was added phenylacetylene (102.13 mg, 1 mmol, 1.0 equiv.), followed by 9-borabicyclo[3.3.1]nonane (0.5 M solution in THF, 2.00 mL, 1.0 mmol, 1.0 equiv.). The solution was allowed to stir for 3 hours at room temperature then used without further purification as a ~0.5 M solution in THF.

### III. Procedure for boron 'ate' complex NMR studies

In an argon-filled glovebox, boronic ester (0.2 mmol, 1.0 equiv.) and THF (0.4 mL) were added to an oven-dried 2-dram vial equipped with a stir bar. The vial was sealed with a septum cap and removed from the glovebox, then cooled to 0 °C. The organolithium reagent (0.2 mmol, 1.0 equiv; in hexanes for *n*-BuLi or dibutyl ether for PhLi) was added dropwise and reaction was allowed to stir at room temperature for 15 minutes before the solvent was carefully removed under vacuum. The vial was brought back into the glovebox and the 'ate' complex was dissolved in THF-*d*8 and transferred to an oven-dried NMR tube. The NMR tube was sealed and a <sup>1</sup>H NMR spectrum was obtained. The NMR tube was then heated to 60 °C for 12 hours before another <sup>1</sup>H NMR spectrum was obtained.

<sup>1</sup>H NMR (500 MHz, THF-*d*8)

nBuB(mac) + PhLi, RT, 30 min

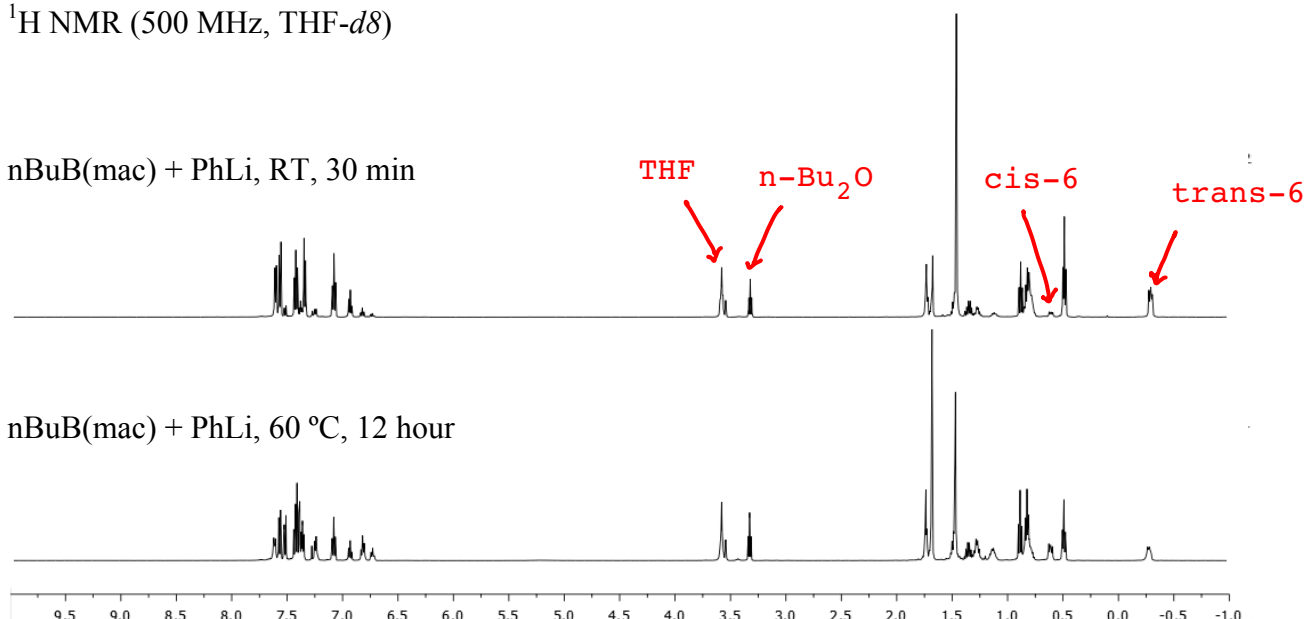

nBuB(mac) + PhLi, 60 °C, 12 hour

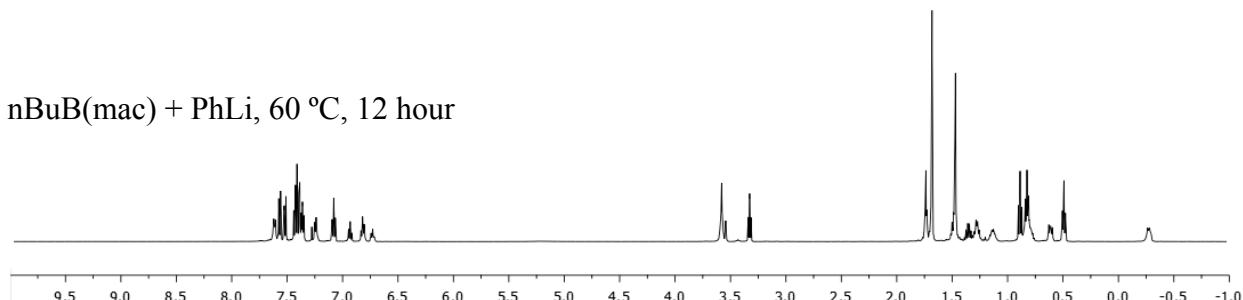

PhB(mac) + nBuLi, RT, 30 min

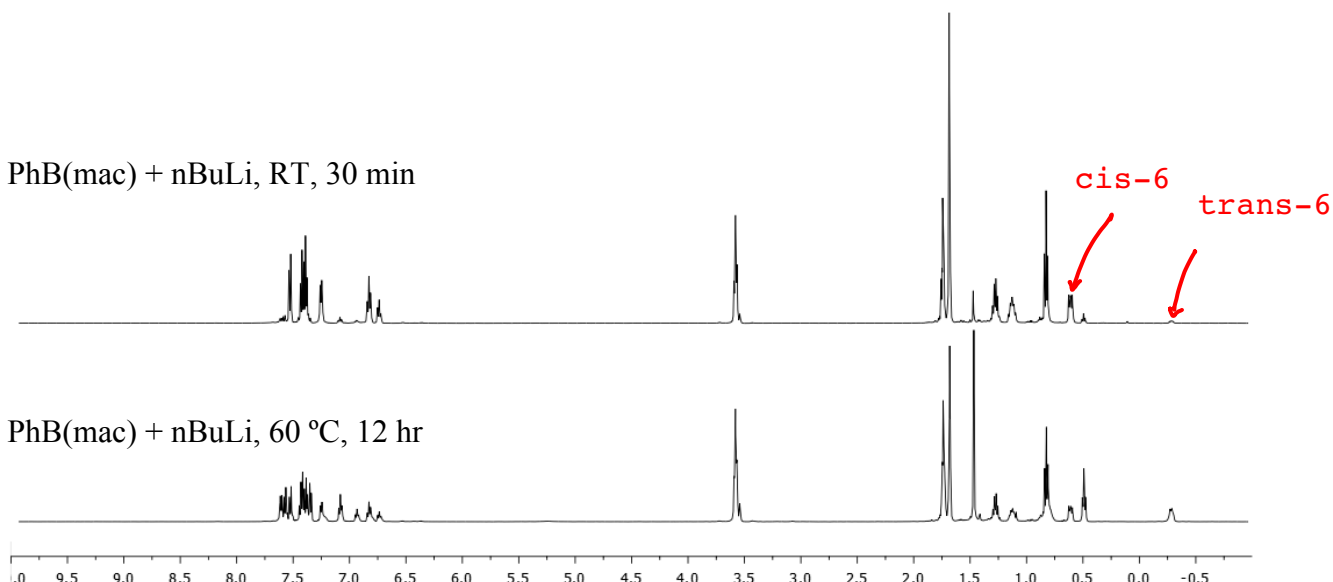

PhB(mac) + nBuLi, 60 °C, 12 hr

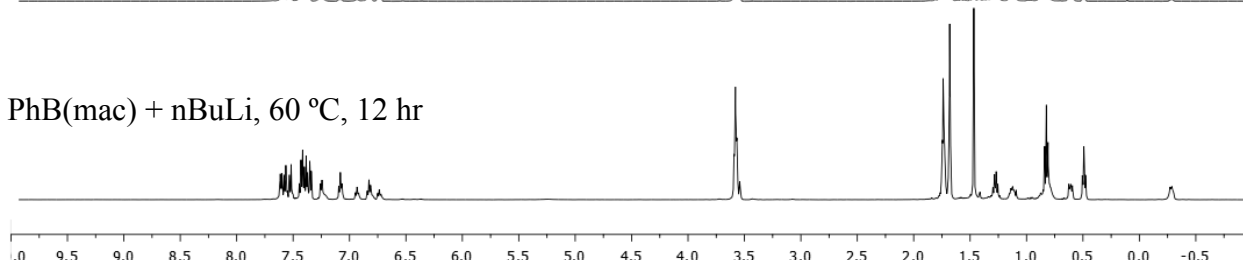

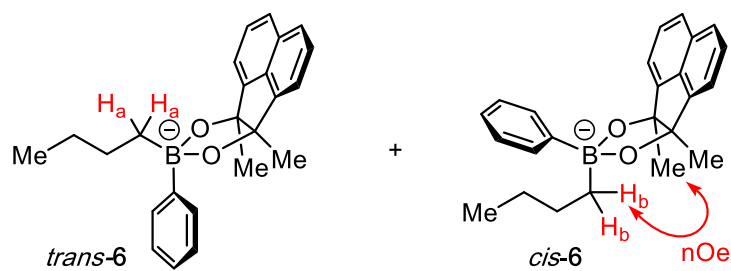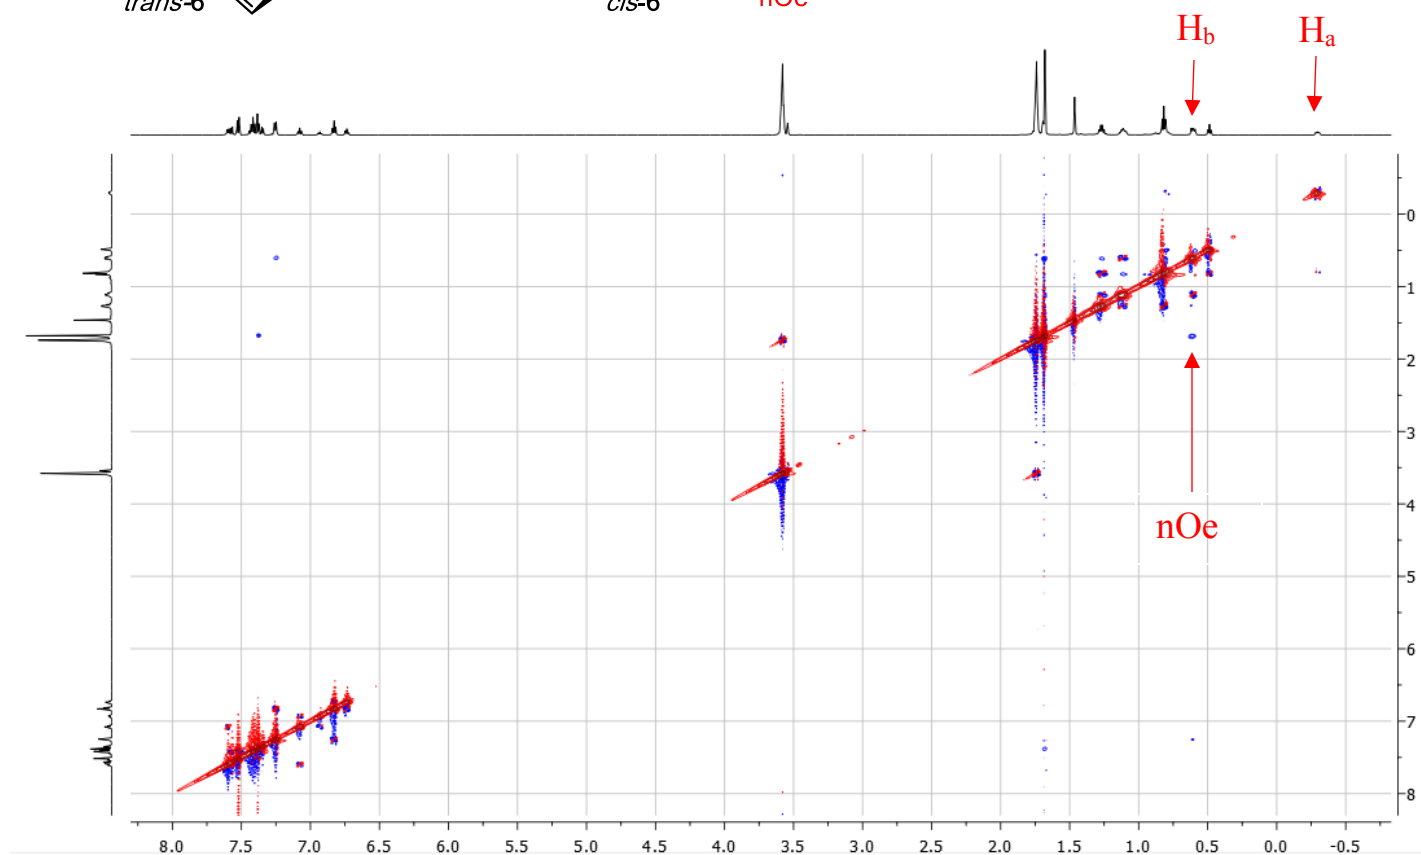

**IV. Representative procedure for Conjunctive Cross-Coupling****Method A:**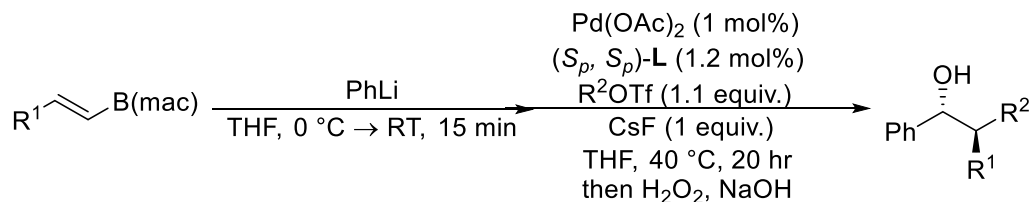

To an oven-dried 2-dram vial equipped with a magnetic stir bar in an Ar-filled glovebox was added alkenyl boronic acid “mac” ester (0.20 mmol, 1.00 equiv.) and THF (0.4 mL). The vial was sealed with a septum cap, and removed from the glovebox. The reaction vial was cooled to 0 °C, and a phenyllithium solution (1.9 M in dibutyl ether, 0.20 mmol, 1.0 equiv.) was added at 0 °C. The reaction vial was allowed to warm to room temperature and stirred for 15 minutes, then the solvent was carefully removed under reduced pressure, and the reaction vial was brought back into the glovebox. Cesium fluoride (0.20 mmol, 1.0 equiv.) was added to the reaction vial, followed by THF (0.6 mL), and the vial was stirred at room temperature for 5 minutes. To a separate oven-dried 2-dram vial equipped with a magnetic stir bar in the glovebox was added Pd(OAc)<sub>2</sub> (0.002 mmol, 0.01 equiv.), (S<sub>p</sub>, S<sub>p</sub>)-L (0.0024 mmol, 0.012 equiv.), and THF (0.2 mL). The Pd(OAc)<sub>2</sub>/(S<sub>p</sub>, S<sub>p</sub>)-L solution was allowed to stir for 15 minutes at room temperature, then it was transferred into the reaction vial, followed by aryl triflate (0.22 mmol, 1.10 equiv.). The reaction vial was sealed with a polypropylene cap, taped, and brought out of the glovebox where it was allowed to stir at 40 °C for 20 hours. The resulting mixture was cooled to room temperature, filtered through a celite plug with diethyl ether, and concentrated under reduced pressure. The crude product was diluted with THF (3 mL) and cooled to 0 °C before 3M NaOH (2 mL) was added, followed by 30% H<sub>2</sub>O<sub>2</sub> (1.0 mL) dropwise. The reaction was allowed to warm to room temperature and stirred for 4 hours, then quenched at 0 °C by dropwise addition of saturated aq. Na<sub>2</sub>S<sub>2</sub>O<sub>3</sub> solution (3 mL). This solution was allowed to stir at room temperature for 10 minutes. The mixture was diluted with Et<sub>2</sub>O and transferred to a separatory funnel, and the aqueous layer was washed with Et<sub>2</sub>O three times. The combined organic layers were washed with brine then dried over Na<sub>2</sub>SO<sub>4</sub>, filtered, and concentrated under reduced pressure. The crude material was subsequently purified via silica gel (treated with 2% triethylamine / hexanes prior to use) column chromatography to afford the desired product.

**Method B:**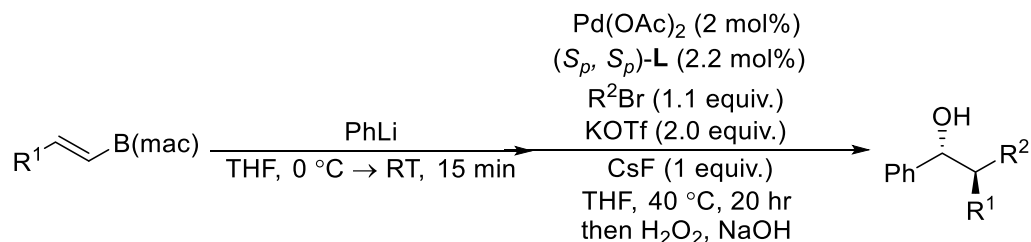

To an oven-dried 2-dram vial equipped with a magnetic stir bar in an Ar-filled glovebox was added alkenyl boronic acid “mac” ester (0.20 mmol, 1.00 equiv.) and THF (0.4 mL), sealed with a septum cap, and removed from the glovebox. The reaction vial was cooled to 0 °C, and a phenyllithium solution (1.9M in dibutyl ether, 0.20 mmol, 1.0 equiv.) was added at 0 °C. The reaction vial was allowed to warm to room temperature and stirred for 15 minutes. Then, the solvent was carefully removed under reduced pressure, and the reaction vial was brought back into

the glovebox. Cesium fluoride (0.20 mmol, 1.0 equiv.) was added to the reaction vial, followed by THF (0.4 mL), and the vial was stirred at room temperature for 5 minutes, then potassium trifluoromethanesulfonate (0.40 mmol, 2.0 equiv) was added. To a separate oven-dried 2-dram vial equipped with a magnetic stirbar in the glovebox was added Pd(OAc)<sub>2</sub> (0.004 mmol, 0.020 equiv.), (*S<sub>p</sub>*, *S<sub>p</sub>*)-**L** (0.0044 mmol, 0.022 equiv.), and THF (0.4 mL). The Pd(OAc)<sub>2</sub>/*(S<sub>p</sub>*, *S<sub>p</sub>*)-**L** solution was allowed to stir for 15 minutes at room temperature, then transferred into the reaction vial, followed by aryl/alkenyl bromide (0.22 mmol, 1.10 equiv.). The reaction vial was sealed with a polypropylene cap, taped, and brought out of the glovebox where it was allowed to stir at 40 °C for 20 hours. The same oxidation and purification procedure was done as in Method A.

### Method C:

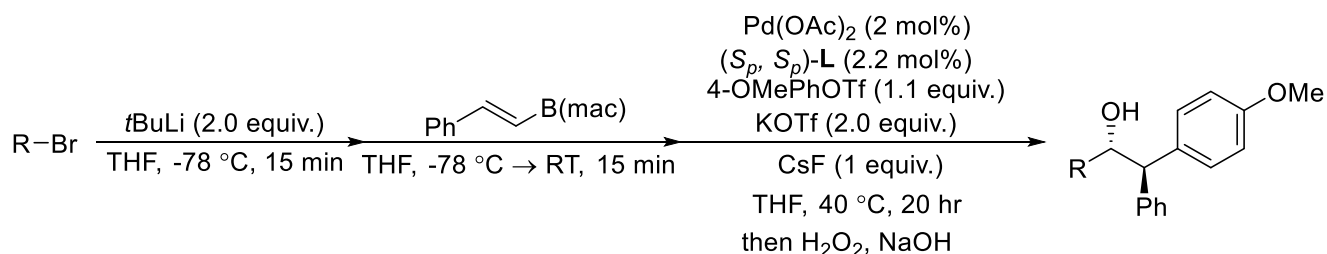

To an oven-dried 2-dram vial equipped with a magnetic stir bar in an Ar-filled glovebox was added aryl/alkenyl bromide (0.20 mmol, 1.00 equiv.) and THF (0.2 mL), and sealed with a septum cap. To a separate oven-dried 1-dram vial was added styrenyl B(mac) (**S-1**) (0.2 mmol, 1.0 equiv.) and THF (0.4 mL). Both vials were removed from the glove box. The 2-dram reaction vial was cooled to -78 °C, and a *tert*-butyllithium solution (0.40 mmol, 2.0 equiv.) was added dropwise at -78 °C and the reaction was allowed to stir at that temperature for 15 minutes. The solution of styrenyl B(mac) (**S-1**) from the 1-dram vial was then added to the reaction vial slowly, and the reaction was warmed to room temperature and stirred for 15 minutes, then the solvent was carefully removed under reduced pressure, and the reaction vial was brought back into the glovebox. Cesium fluoride (0.20 mmol, 1.0 equiv.) was added to the reaction vial, followed by THF (0.4 mL), and the vial was stirred at room temperature for 5 minutes, then potassium trifluoromethanesulfonate (0.40 mmol, 2.0 equiv) was added. To a separate oven-dried 2-dram vial equipped with a magnetic stir bar in the glovebox was added Pd(OAc)<sub>2</sub> (0.004 mmol, 0.02 equiv.), (*S<sub>p</sub>*, *S<sub>p</sub>*)-**L** (0.0044 mmol, 0.022 equiv.), and THF (0.4 mL). The Pd(OAc)<sub>2</sub>/*(S<sub>p</sub>*, *S<sub>p</sub>*)-**L** solution was allowed to stir for 15 minutes at room temperature then transferred into the reaction vial, followed by and 4-methoxyphenyl trifluoromethanesulfonate (0.22 mmol, 1.10 equiv.). The reaction vial was sealed with a polypropylene cap, taped, and brought out of the glovebox where it was allowed to stir at 40 °C for 20 hours. The same oxidation and purification procedure was done as in Method A.

## V. Characterization of Conjunctive Cross Coupling Products and Analysis of Stereochemistry

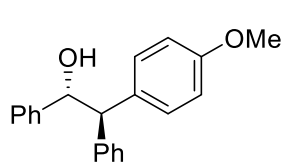

**(1R,2R)-2-(4-methoxyphenyl)-1,2-diphenylethan-1-ol (2b).** The reaction was performed according to the general procedure (*Method A*) with styrenyl B(mac) (S-1) (65.2 mg, 0.20 mmol, 1.0 equiv.), phenyllithium (1.9 M in dibutyl ether, 0.11 mL, .20 mmol, 1.0 equiv.), 4-methoxyphenyl trifluoromethanesulfonate (56.4 mg, 0.22 mmol, 1.1 equiv.), palladium (II) acetate (0.45 mg, 2.0  $\mu$ mol, 0.010 equiv.), (*S<sub>p</sub>*, *S<sub>p</sub>*)-**L** (2.5 mg, 2.4  $\mu$ mol), 0.012 equiv.), and cesium fluoride (30.4 mg, 0.2 mmol, 1.0 equiv.) in THF (0.80 mL, 0.25 M). The crude mixture was purified by silica gel chromatography (5-20% EtOAc in hexanes, stain in magic stain) to afford a white solid (46 mg, 76% yield). <sup>1</sup>H NMR (500 MHz, CDCl<sub>3</sub>)  $\delta$  (d, J = 8.2 Hz, 2H), 7.29 – 7.05 (m, 10H), 6.89 (d, J = 8.2 Hz, 2H), 5.36 (d, J = 8.5 Hz, 1H), 4.22 (d, J = 8.5 Hz, 1H), 3.80 (s, 3H), 2.16 (br, 1H).; <sup>13</sup>C NMR (126 MHz, CDCl<sub>3</sub>):  $\delta$  158.5, 142.3, 141.9, 132.8, 130.0, 128.5, 128.2, 128.0, 127.5, 126.9, 126.3, 114.2, 76.9, 59.4, 55.2.; IR (neat):  $\nu_{\text{max}}$  3385.3 (br), 3060.4 (w), 3028.0 (m), 2906.4 (m), 2834.7 (w), 1609.2 (m), 1509.4 (s), 1245.9 (s), 1075.1 (s), 785.0 (m), 697.3 (s), 596.5 (m) cm<sup>-1</sup>. HRMS (DART) for C<sub>21</sub>H<sub>19</sub>O [M+H-H<sub>2</sub>O]<sup>+</sup>: calculated: 287.1436, found: 287.1431. [ $\alpha$ ]<sub>D</sub><sup>20</sup>: -43.242 (c = 1.200, CHCl<sub>3</sub>, l = 50 mm).

**Analysis of Stereochemistry:**

Diastereomer ratio was determined by <sup>1</sup>H NMR analysis of the crude reaction mixture. Racemic compound was prepared according to the procedure described above with Pd(OAc)<sub>2</sub> (2 mol%) and 1,3-Bis(diphenylphosphino)propane (2.4 mol%) as the catalyst. Absolute stereochemistry was assigned by analogy (see compounds 26, 31).

*Chiral SFC (OD-H, 12% IPA, 4 mL/min, 100 bar, 35 °C, 210-270 nm) – analysis of (1R,2R)-2-(4-methoxyphenyl)-1,2-diphenylethan-1-ol.*

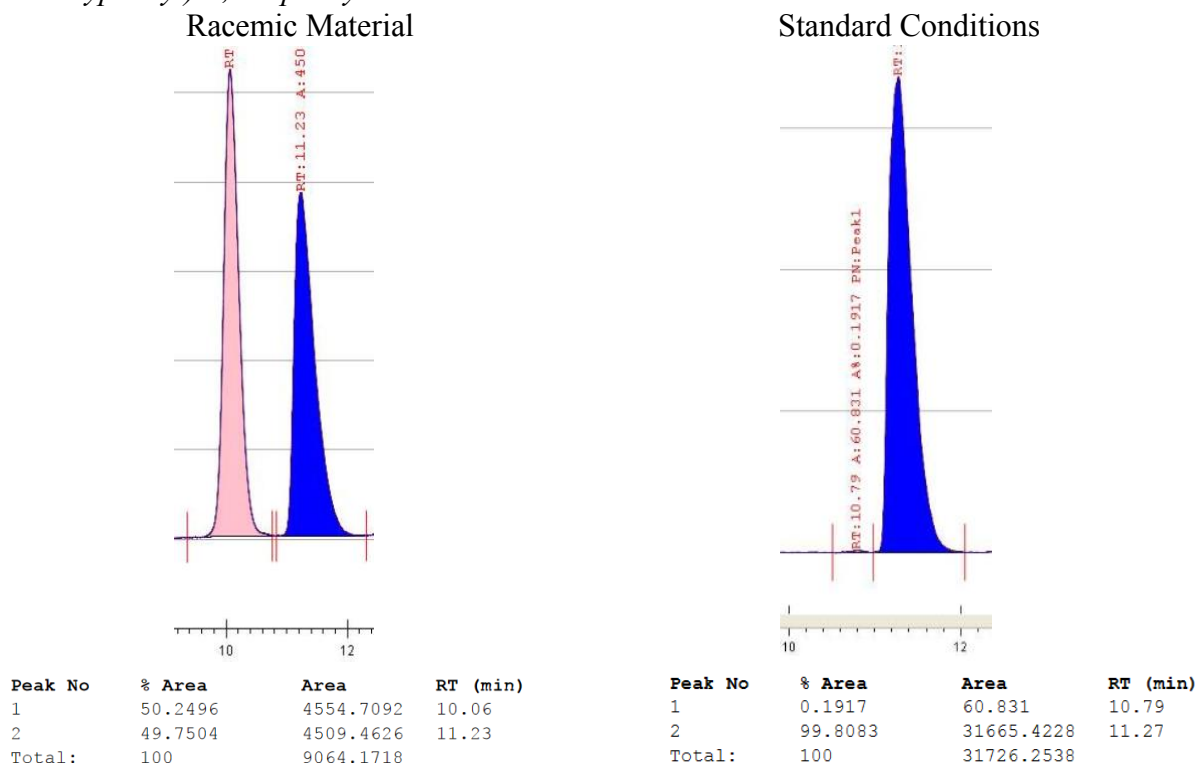

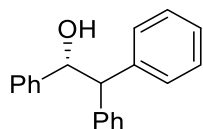

**(R)-1,2,2-triphenylethan-1-ol (7).** The reaction was performed according to the general procedure (*Method A*) with styrenyl B(mac) (S-1) (65.2 mg, 0.20 mmol, 1.0 equiv.), phenyllithium (1.9 M in dibutyl ether, 0.11 mL, .20 mmol, 1.0 equiv.), phenyl trifluoromethanesulfonate (49.8 mg, 0.22 mmol, 1.1 equiv.), palladium (II) acetate (0.45 mg, 2.0  $\mu$ mol, 0.010 equiv.), (*S<sub>p</sub>*, *S<sub>p</sub>*)-**L** (2.5 mg, 2.4  $\mu$ mol), 0.012 equiv.), cesium fluoride (30.4 mg, 0.2 mmol, 1.0 equiv.) in THF (0.80 mL, 0.25 M). The crude mixture was purified by silica gel chromatography (2-10% EtOAc in hexanes, stain in magic stain) to afford a white solid (47 mg, 86% yield).  $^1\text{H}$  NMR (600 MHz,  $\text{CDCl}_3$ )  $\delta$  7.43 (d,  $J$  = 7.3 Hz, 2H), 7.36 (t,  $J$  = 7.6 Hz, 2H), 7.31 – 7.19 (m, 6H), 7.19 – 7.08 (m, 5H), 5.41 (dd,  $J$  = 8.8, 2.7 Hz, 1H), 4.27 (d,  $J$  = 8.8 Hz, 1H), 2.13 (d,  $J$  = 2.9 Hz, 1H).;  $^{13}\text{C}$  NMR (126 MHz,  $\text{CDCl}_3$ ):  $\delta$  142.2, 141.5, 140.9, 128.9, 128.8, 128.6, 128.2, 128.0, 127.6, 127.0, 126.9, 126.4, 76.8, 60.3.; IR (neat):  $\nu_{\text{max}}$  3341.8 (br), 3060.0 (m), 3027.2 (m), 2908.2 (w), 1598.9 (m), 1493.5 (m), 1451.3 (m), 1301.2 (m), 743.9 (s), 697.0 (s), 598.8 (s)  $\text{cm}^{-1}$ . HRMS (DART) for  $\text{C}_{20}\text{H}_{17}$   $[\text{M}+\text{H}-\text{H}_2\text{O}]^+$ : calculated: 257.1325, found: 257.1324.  $[\alpha]_{\text{D}}^{20}$ : -63.355 ( $c$  = 0.960,  $\text{CHCl}_3$ ,  $l$  = 50 mm).

### Analysis of Stereochemistry:

Racemic compound was prepared according to the procedure described above with  $\text{Pd}(\text{OAc})_2$  (2 mol%) and 1,3-Bis(diphenylphosphino)propane (2.4 mol%) as the catalyst. Absolute stereochemistry was assigned by analogy (see compounds 26, 31).

Chiral SFC (Chiralcel OD-H, 10% IPA, 4 mL/min, 100 bar, 35  $^\circ\text{C}$ , 210-270 nm) – analysis of (R)-1,2,2-triphenylethan-1-ol.

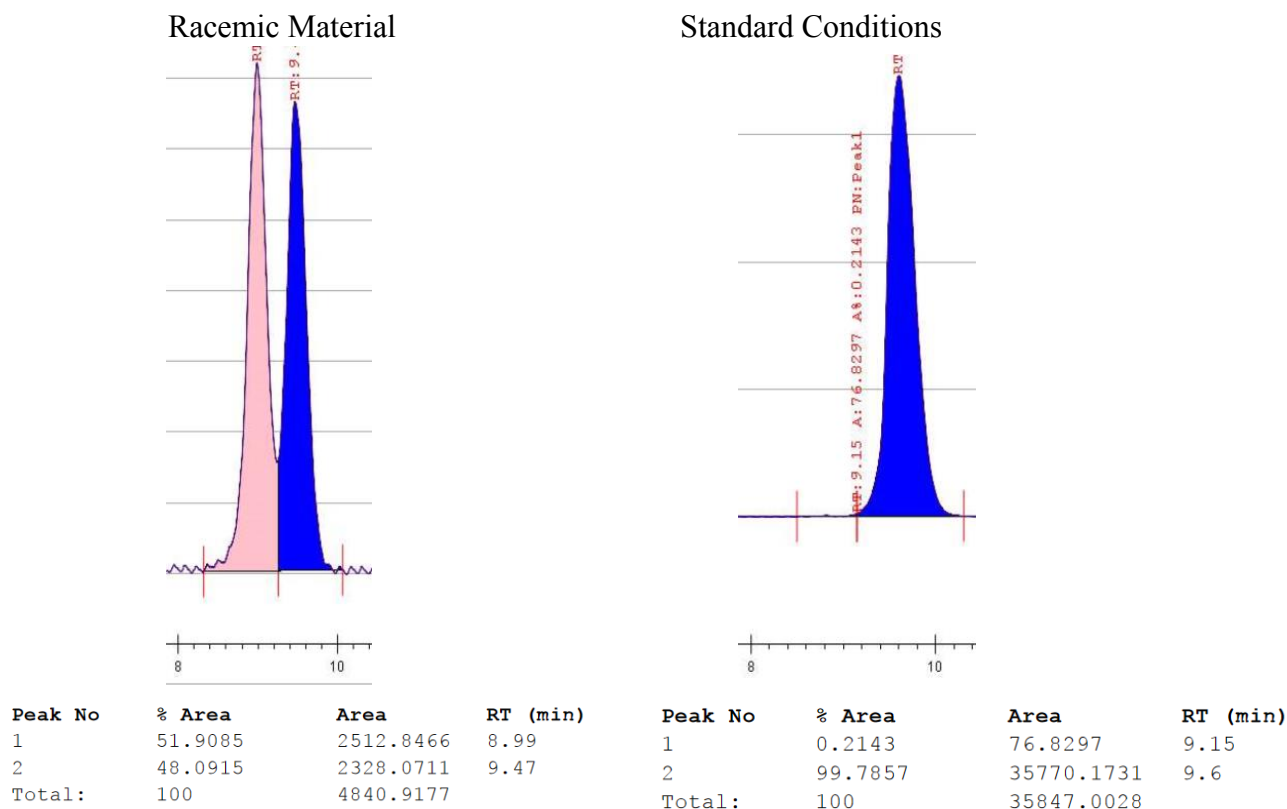



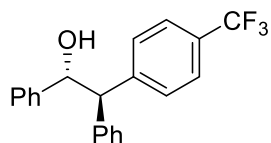**(1R,2R)-1,2-diphenyl-2-(4-(trifluoromethyl)phenyl)ethan-1-ol (8).**

The reaction was performed according to the general procedure (**Method B**) with styrenyl B(mac) (S-1) (65.2 mg, 0.20 mmol, 1.0 equiv.), phenyllithium (1.9 M in dibutyl ether, 0.11 mL, .20 mmol, 1.0 equiv.), 1-bromo-4-(trifluoromethyl)benzene (49.5 mg, 0.22 mmol, 1.1 equiv.), palladium (II) acetate (0.90 mg, 4.0  $\mu$ mol, 0.020 equiv.), (*S<sub>p</sub>*, *S<sub>p</sub>*)-**L** (5.0 mg, 4.8  $\mu$ mol), 0.024 equiv.), cesium fluoride (30.4 mg, 0.2 mmol, 1.0 equiv.), and potassium trifluoromethanesulfonate (75.3 mg, 0.40 mmol, 2.0 equiv.) in THF (0.80 mL, 0.25 M). The crude mixture was purified by silica gel chromatography (2-10% EtOAc in hexanes, stain in magic stain) to afford a pale yellow oil (30 mg, 44% yield). <sup>1</sup>H NMR (600 MHz, CDCl<sub>3</sub>)  $\delta$  7.58 (d, *J* = 8.0 Hz, 2H), 7.52 (d, *J* = 8.0 Hz, 2H), 7.28 – 7.08 (m, 10H), 5.44 (d, *J* = 8.3 Hz, 1H), 4.33 (d, *J* = 8.3 Hz, 1H), 2.06 (br, 1H).; <sup>13</sup>C NMR (151 MHz, CDCl<sub>3</sub>):  $\delta$  147.9, 144.8, 143.5, 132.1, 131.6 (q, <sup>2</sup>*J*<sub>C-F</sub> = 32.4 Hz), 131.2, 131.09, 131.06, 130.9, 130.5, 129.4, 129.3, 128.0 (q, <sup>3</sup>*J*<sub>C-F</sub> = 3.7 Hz), 126.9 (partially buried, q, <sup>1</sup>*J*<sub>C-F</sub> = 271.8 Hz), 79.3, 62.3, 33.0.; <sup>19</sup>F NMR (470 MHz, CDCl<sub>3</sub>):  $\delta$  -62.4.; IR (neat):  $\nu_{\text{max}}$  3359.1 (br), 3063.1 (w), 3029.7 (m), 2924.1 (w), 1618.8 (m), 1324.7 (s), 1163.9 (m), 1113.7 (m), 1068.7 (m), 746.9 (m) cm<sup>-1</sup>. HRMS (DART) for C<sub>21</sub>H<sub>16</sub>F<sub>3</sub> [M+H-H<sub>2</sub>O]<sup>+</sup>: calculated: 325.1204, found: 325.1211. [ $\alpha$ ]<sub>D</sub><sup>20</sup>: -50.989 (c = 1.055, CHCl<sub>3</sub>, *l* = 50 mm).

**Analysis of Stereochemistry:**

Diastereomer ratio was determined by <sup>1</sup>H NMR analysis of the crude reaction mixture. Racemic compound was prepared according to the procedure described above with Pd(OAc)<sub>2</sub> (2 mol%) and 1,3-Bis(diphenylphosphino)propane (2.4 mol%) as the catalyst. Absolute stereochemistry was assigned by analogy (see compounds 26, 31).

*Chiral SFC (Chiralcel OD-H, 10% IPA, 3 mL/min, 100 bar, 35 °C, 210-270 nm) – analysis of (1R,2R)-1,2-diphenyl-2-(4-(trifluoromethyl)phenyl)ethan-1-ol.*

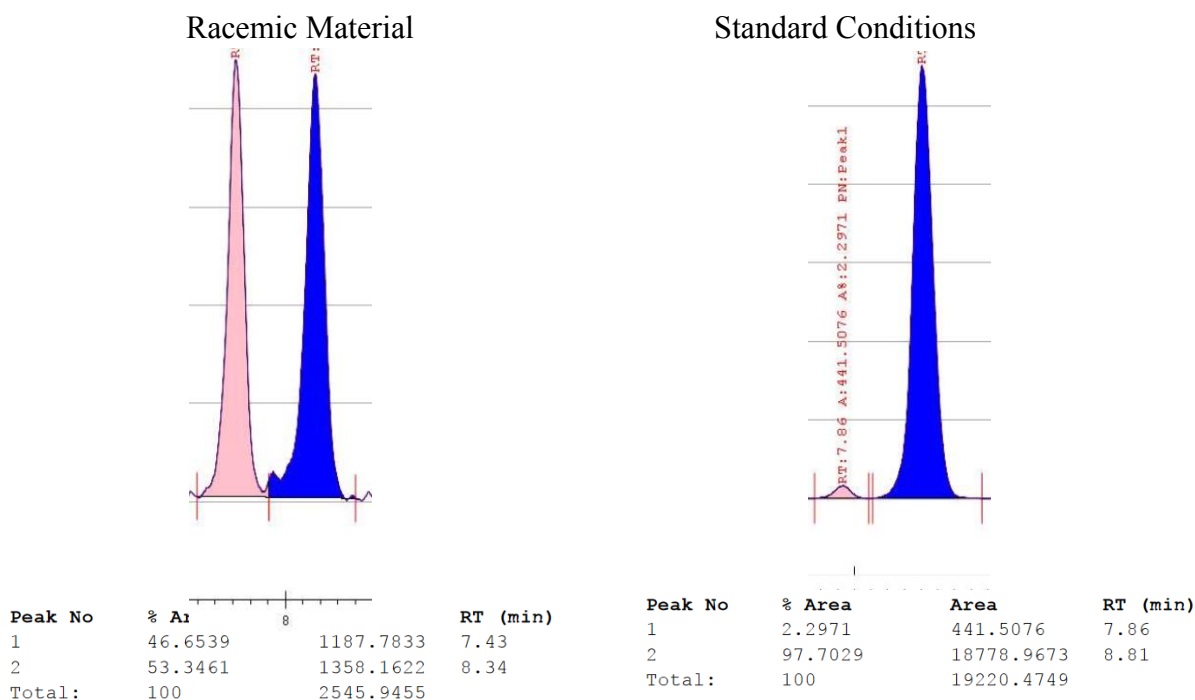

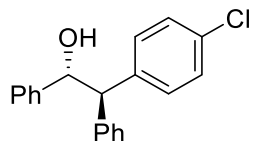

**(1R,2R)-2-(4-chlorophenyl)-1,2-diphenylethan-1-ol (9).** The reaction was performed according to the general procedure (**Method B**) with styrenyl B(mac) (S-1) (65.2 mg, 0.20 mmol, 1.0 equiv.), phenyllithium (1.9 M in dibutyl ether, 0.11 mL, .20 mmol, 1.0 equiv.), 1-bromo-4-chlorobenzene (42.1 mg, 0.22 mmol, 1.1 equiv.), palladium (II) acetate (0.90 mg, 4.0  $\mu$ mol, 0.020 equiv.), (*S<sub>p</sub>*, *S<sub>p</sub>*)-**L** (5.0 mg, 4.8  $\mu$ mol), 0.024 equiv.), cesium fluoride (30.4 mg, 0.2 mmol, 1.0 equiv.), and potassium trifluoromethanesulfonate (75.3 mg, 0.40 mmol, 2.0 equiv.) in THF (0.80 mL, 0.25 M). The crude mixture was purified by silica gel chromatography (2-10% EtOAc in hexanes, stain in magic stain) to afford a pale yellow oil (29 mg, 47% yield).  $^1\text{H}$  NMR (500 MHz,  $\text{CDCl}_3$ )  $\delta$  7.47 – 7.06 (m, 14H), 5.38 (d,  $J$  = 8.2 Hz, 1H), 4.24 (d,  $J$  = 8.2 Hz, 1H), 2.05 (br, 1H).;  $^{13}\text{C}$  NMR (126 MHz,  $\text{CDCl}_3$ ):  $\delta$  142.4, 141.4, 139.6, 132.8, 130.6, 128.9, 128.7, 128.54, 128.53, 128.3, 127.9, 126.9, 126.8, 76.9, 59.4.; IR (neat):  $\nu_{\text{max}}$  3350.5, 3061.4, 3028.4, 2920.9, 1491.2, 1453.2, 1014.8, 799.1, 734.8, 698.5  $\text{cm}^{-1}$ . HRMS (DART) for  $\text{C}_{20}\text{H}_{16}\text{Cl}$  [ $\text{M}+\text{H}-\text{H}_2\text{O}$ ] $^{+}$ : calculated: 291.0941, found: 291.0930.  $[\alpha]_{\text{D}}^{20}$ : -32.43 ( $c$  = 1.00,  $\text{CHCl}_3$ ,  $l$  = 50 mm).

### Analysis of Stereochemistry:

Diastereomer ratio was determined by  $^1\text{H}$  NMR analysis of the crude reaction mixture. Racemic compound was prepared according to the procedure described above with  $\text{Pd}(\text{OAc})_2$  (2 mol%) and 1,3-Bis(diphenylphosphino)propane (2.4 mol%) as the catalyst. Absolute stereochemistry was assigned by analogy (see compounds 26, 31).

Chiral SFC (Chiralcel OD-H, 10% IPA, 4 mL/min, 100 bar, 35  $^{\circ}\text{C}$ , 210-270 nm) – analysis of (1R,2R)-2-(4-chlorophenyl)-1,2-diphenylethan-1-ol.

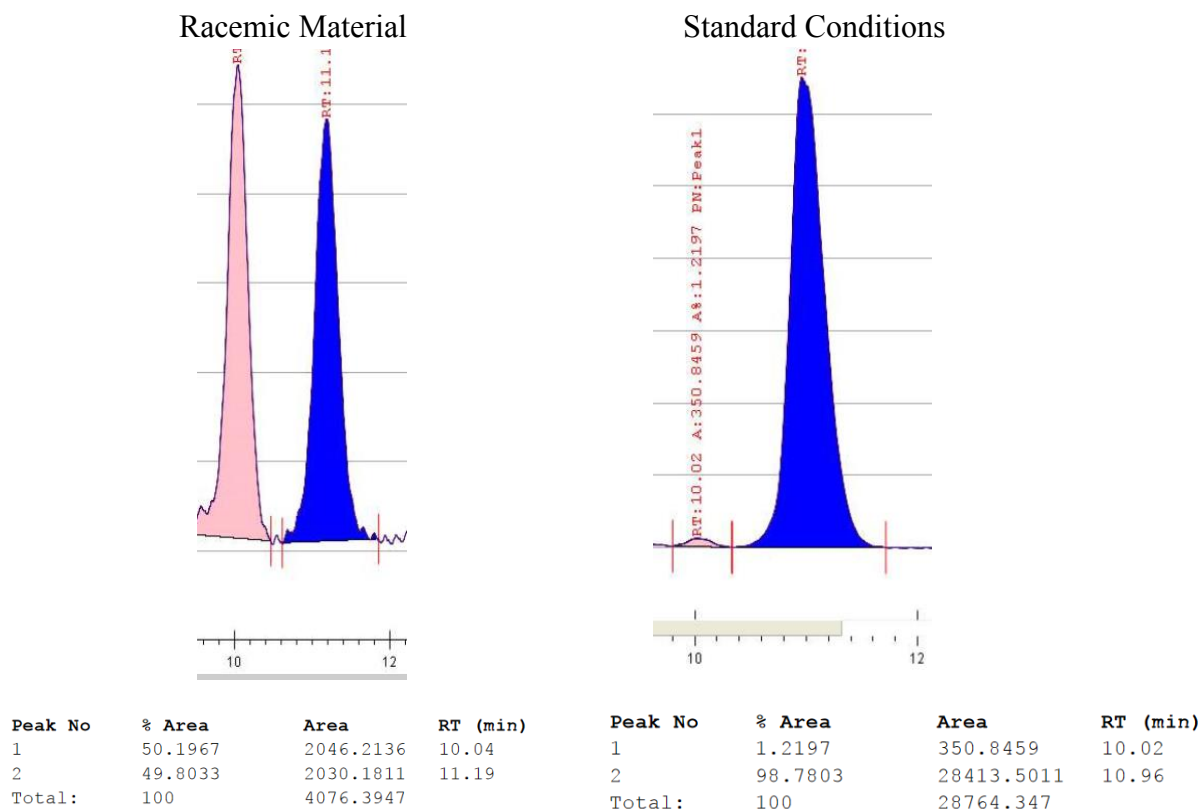

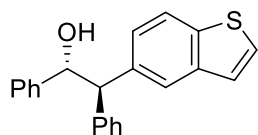

**(1R,2R)-2-(benzo[b]thiophen-5-yl)-1,2-diphenylethan-1-ol (10).** The reaction was performed according to the general procedure (**Method B**) with styrenyl B(mac) (S-1) (65.2 mg, 0.2 mmol, 1 equiv.), phenyllithium in dibutyl ether solution (1.9 M) (0.105 mL, 0.2 mmol, 1 equiv.), 5-

bromobenzothiophene (46.9 mg, 0.22 mmol, 1.10 equiv.), palladium (II) acetate (0.45 mg, 0.002 mmol, 0.010 equiv.), (*S<sub>p</sub>*, *S<sub>p</sub>*)-**L** (2.30 mg, 0.0022 mmol, 0.011 equiv.), potassium triflate (75.3 mg, 0.4 mmol, 2 equiv.), and cesium fluoride (30.4 mg, 0.2 mmol, 1 equiv.) in THF (0.8 mL, 0.25 M). The crude mixture was purified by silica gel chromatography (5-20% EtOAc in hexanes, stain in magic stain) to afford a white solid (28.4 mg, 43% yield). <sup>1</sup>H NMR (600 MHz, CDCl<sub>3</sub>) δ 7.89 (s, 1H), 7.84 (d, *J* = 8.4 Hz, 1H), 7.44 (d, *J* = 5.4 Hz, 1H), 7.38 (d, *J* = 8.4 Hz, 1H), 7.32 (d, *J* = 5.4 Hz, 1H), 7.25 – 7.03 (m, 10H), 5.48 (d, *J* = 8.7 Hz, 1H), 4.40 (d, *J* = 8.6 Hz, 1H), 2.16 (s, 1H). <sup>13</sup>C NMR (151 MHz, CDCl<sub>3</sub>) δ 142.4, 141.8, 140.2, 138.6, 137.2, 128.7, 128.4, 128.2, 127.7, 127.1, 127.0, 126.5, 125.7, 124.0, 123.8, 122.9, 77.0, 60.3. IR (neat): ν<sub>max</sub> 3356.7 (bm), 3062.1 (m), 3027.3 (m), 2921.4 (m), 2855.0 (w), 1728.2 (w), 1600.1 (m), 1551.5 (m), 1491.9 (m), 1049.7 (m), 753.0 (s), 696.9 (s), 553.5 (m) cm<sup>-1</sup>. HRMS (DART) for C<sub>22</sub>H<sub>18</sub>OS [M+H-H<sub>2</sub>O]<sup>+</sup>: calculated: 313.1051, found: 313.1049. [α]<sub>D</sub><sup>20</sup>: -38.828 (c = 0.855, CHCl<sub>3</sub>, *l* = 50 mm).

#### Analysis of Stereochemistry:

Diastereomer ratio was determined by <sup>1</sup>H NMR analysis of the crude reaction mixture. Racemic compound was prepared according to the procedure described above with styrenyl B(mac), and Pd(OAc)<sub>2</sub> (2 mol%) and a mixture of (*R<sub>p</sub>*, *R<sub>p</sub>*)-**L** and (*S<sub>p</sub>*, *S<sub>p</sub>*)-**L** (2.4 mol%) as the catalyst as the catalyst. Absolute stereochemistry was assigned by analogy (see compounds 26, 31).

*Chiral SFC (Chiralcel ODR-H, 15% IPA, 3 mL/min, 100 bar, 35 °C, 210-270 nm) – analysis of (1R,2R)-2-(benzo[b]thiophen-5-yl)-1,2-diphenylethan-1-ol*

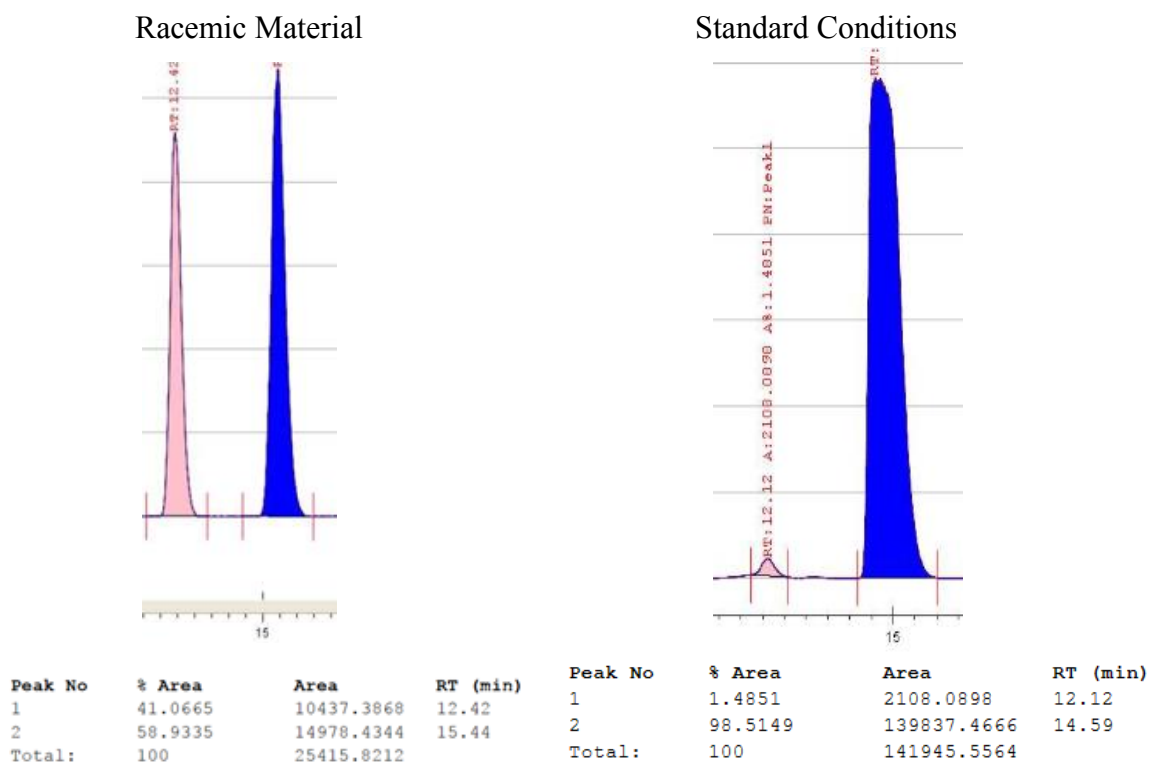

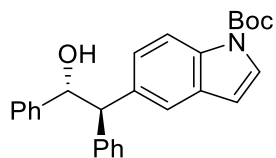

**tert-butyl 5-((1R,2R)-2-hydroxy-1,2-diphenylethyl)-1H-indole-1-carboxylate (11).** The reaction was performed according to the general procedure (*Method B*) with styrenyl B(mac) (S-1) (65.2 mg, 0.20 mmol, 1.0 equiv.), phenyllithium (1.9 M in dibutyl ether, 0.11 mL, .20 mmol, 1.0 equiv.), tert-butyl 5-bromoindole-1-carboxylate (65.2 mg, 0.22 mmol, 1.1 equiv.), palladium (II) acetate (0.90 mg, 4.0  $\mu$ mol, 0.020 equiv.), (*S<sub>p</sub>*, *S<sub>p</sub>*)-**L** (5.0 mg, 4.8  $\mu$ mol), 0.024 equiv.), cesium fluoride (30.4 mg, 0.2 mmol, 1.0 equiv.), and potassium trifluoromethanesulfonate (75.3 mg, 0.40 mmol, 2.0 equiv.) in THF (0.80 mL, 0.25 M). The crude mixture was purified by silica gel chromatography (2-20% EtOAc in hexanes, stain in magic stain) to afford a white solid (49 mg, 59% yield).  $^1\text{H}$  NMR (600 MHz,  $\text{CDCl}_3$ )  $\delta$  8.11 (d,  $J$  = 8.0 Hz, 1H), 7.68 – 7.56 (m, 2H), 7.37 (d,  $J$  = 8.4 Hz, 1H), 7.31 – 7.04 (m, 10H), 6.55 (d,  $J$  = 3.7 Hz, 1H), 5.46 (d,  $J$  = 8.6 Hz, 1H), 4.37 (d,  $J$  = 8.6 Hz, 1H), 2.23 (s, 1H), 1.68 (s, 9H).;  $^{13}\text{C}$  NMR (151 MHz,  $\text{CDCl}_3$ ):  $\delta$  149.9, 142.5, 142.1, 135.3, 134.4, 131.2, 128.7, 128.4, 128.2, 127.7, 127.1, 126.5, 126.4, 125.4, 121.3, 115.6, 107.5, 83.9, 77.1, 60.4, 28.4.; IR (neat):  $\nu_{\text{max}}$  3412.5 (br), 3061.8 (m), 2978.7 (m), 1730.4 (s), 1492.63 (m), 1371.9 (s), 1163.0 (s), 1083.6 (m), 754.3 (s), 698.7 (s)  $\text{cm}^{-1}$ . HRMS (DART) for  $\text{C}_{27}\text{H}_{26}\text{NO}_2$  [ $\text{M}+\text{H}-\text{H}_2\text{O}$ ] $^+$ : calculated: 396.1964, found: 396.1953.  $[\alpha]_{\text{D}}^{20}$ : -45.59 ( $c$  = 1.033,  $\text{CHCl}_3$ ,  $l$  = 50 mm).

### Analysis of Stereochemistry:

Diastereomer ratio was determined by  $^1\text{H}$  NMR analysis of the crude reaction mixture. Racemic compound was prepared according to the procedure described above with  $\text{Pd}(\text{OAc})_2$  (2 mol%) and a 1:1 mixture of (*R<sub>p</sub>*, *R<sub>p</sub>*)-**L** and (*S<sub>p</sub>*, *S<sub>p</sub>*)-**L** (2.4 mol%) as the catalyst. Absolute stereochemistry was assigned by analogy (see compounds 26, 31).

*Chiral SFC (Chiralcel OD-H, 10% IPA, 3 mL/min, 100 bar, 35 °C, 210-270 nm) – analysis of tert-butyl 5-((1R,2R)-2-hydroxy-1,2-diphenylethyl)-1H-indole-1-carboxylate.*

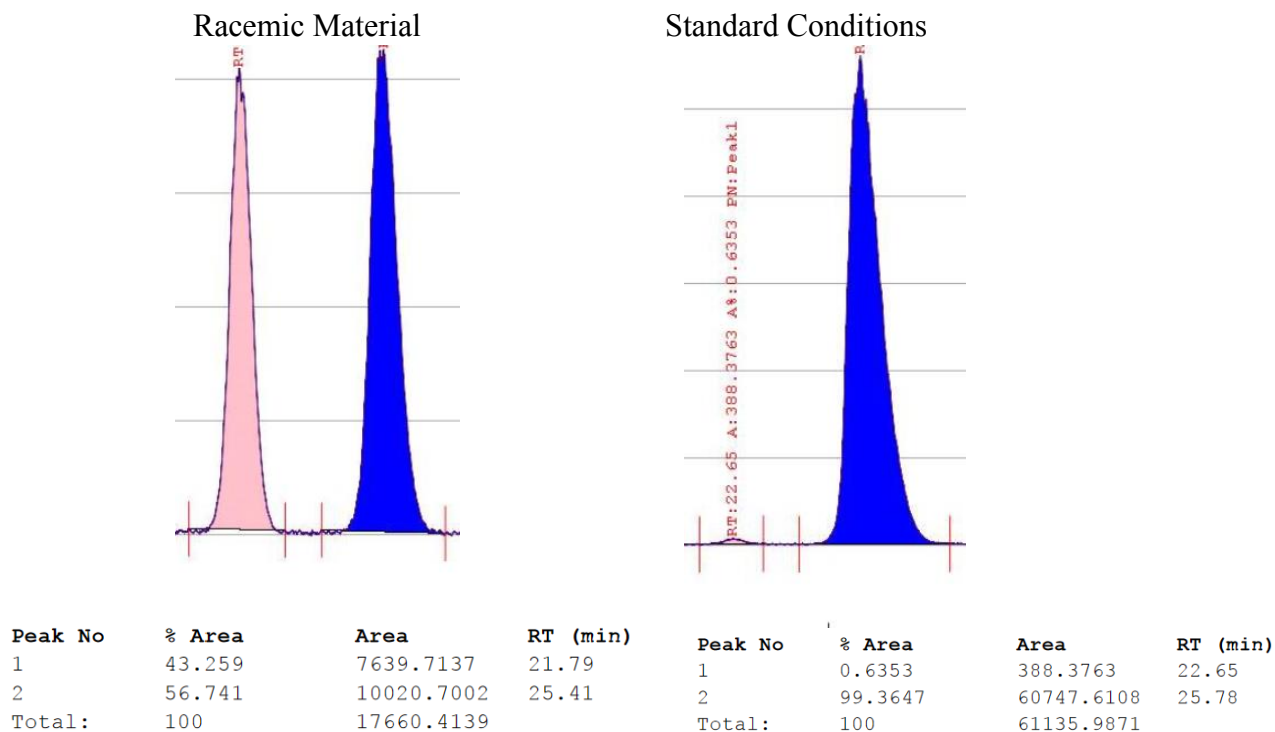

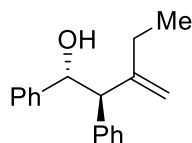

**(1R,2S)-3-methylene-1,2-diphenylpentan-1-ol (12).** The reaction was performed according to the general procedure (**Method B**) with styrenyl B(mac) (S-1) (65.2 mg, 0.20 mmol, 1.0 equiv.), phenyllithium (1.9 M in dibutyl ether, 0.11 mL, .20 mmol, 1.0 equiv.), 2-bromo-1-butene (29.7 mg, 0.22 mmol, 1.1 equiv.), palladium (II) acetate (0.90 mg, 4.0  $\mu$ mol, 0.020 equiv.), (*S<sub>p</sub>*, *S<sub>p</sub>*)-**L** (5.0 mg, 4.8  $\mu$ mol), 0.024 equiv.), cesium fluoride (30.4 mg, 0.2 mmol, 1.0 equiv.), and potassium trifluoromethanesulfonate (75.3 mg, 0.40 mmol, 2.0 equiv.) in THF (0.80 mL, 0.25 M). The crude mixture was purified by silica gel chromatography (2-10% EtOAc in hexanes, stain in magic stain) to afford a pale yellow oil (32 mg, 63% yield). <sup>1</sup>H NMR (600 MHz, CDCl<sub>3</sub>)  $\delta$  7.21 – 7.04 (m, 8H), 6.97 (dt, *J* = 7.5, 1.4 Hz, 2H), 5.37 (s, 1H), 5.22 (s, 1H), 5.06 (d, *J* = 9.8 Hz, 1H), 3.54 (d, *J* = 9.9 Hz, 1H), 2.64 (s, 1H), 2.11 – 1.95 (m, 2H), 1.03 (td, *J* = 7.4, 1.2 Hz, 3H).; <sup>13</sup>C NMR (151 MHz, CDCl<sub>3</sub>):  $\delta$  154.4, 144.4, 142.2, 131.3, 130.6, 130.5, 130.0, 129.6, 129.2, 111.9, 78.6, 64.0, 31.7, 14.8.; IR (neat):  $\nu_{\text{max}}$  3440.4 (br), 3062.1 (w), 3028.4 (m), 2964.4 (m), 1641.4 (w), 1492.4 (m), 1453.0 (m), 1218.9 (m), 1074.2 (m), 755.3 (s), 696.9 (s) cm<sup>-1</sup>. HRMS (DART) for C<sub>18</sub>H<sub>19</sub> [M+H-H<sub>2</sub>O]<sup>+</sup>: calculated: 235.1487, found: 235.1481. [ $\alpha$ ]<sub>D</sub><sup>20</sup>: -209.087 (*c* = 1.020, CHCl<sub>3</sub>, *l* = 50 mm).

### Analysis of Stereochemistry:

Diastereomer ratio was determined by <sup>1</sup>H NMR analysis of the crude reaction mixture. Racemic compound was prepared according to the procedure described above with Pd(OAc)<sub>2</sub> (2 mol%) and a 1:1 mixture of (*R<sub>p</sub>*, *R<sub>p</sub>*)-**L** and (*S<sub>p</sub>*, *S<sub>p</sub>*)-**L** (2.4 mol%) as the catalyst. Absolute stereochemistry was assigned by analogy (see compounds 26, 31).

*Chiral SFC (Chiralcel OJ-H, 5% IPA, 3 mL/min, 100 bar, 35 °C, 210-270 nm) – analysis of (1R,2S)-3-methylene-1,2-diphenylpentan-1-ol.*

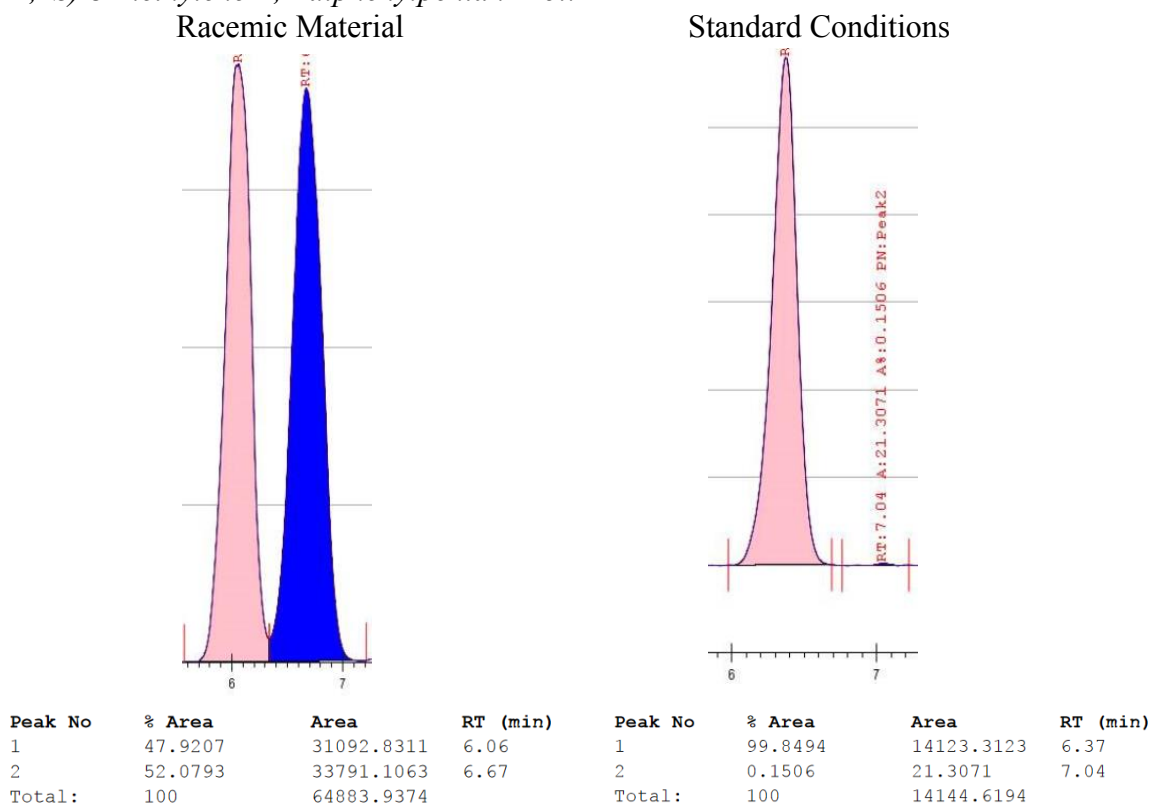

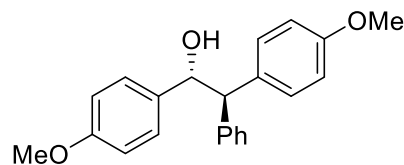**(1R,2R)-1,2-bis(4-methoxyphenyl)-2-phenylethan-1-ol (13).**

The reaction was performed according to the general procedure (**Method C**) with styrenyl B(mac) (S-1) (65.2 mg, 0.20 mmol, 1.0 equiv.), 4-bromoanisole (37.4 mg, 0.20 mmol, 1.0 equiv.), *tert*-butyllithium (1.7 M in pentane, 0.24 mL, 0.40 mmol, 2.0 equiv.), 4-methoxyphenyl trifluoromethanesulfonate (56.4 mg, 0.22 mmol, 1.1 equiv.), palladium (II) acetate (0.90 mg, 4.0  $\mu$ mol, 0.020 equiv.), (*S<sub>p</sub>*, *S<sub>p</sub>*)-**L** (5.0 mg, 4.8  $\mu$ mol), 0.024 equiv.), cesium fluoride (30.4 mg, 0.2 mmol, 1.0 equiv.), and potassium trifluoromethanesulfonate (75.3 mg, 0.40 mmol, 2.0 equiv.) in THF (0.80 mL, 0.25 M). The crude mixture was purified by silica gel chromatography (5-20% EtOAc in hexanes, stain in magic stain) to afford a white solid (52 mg, 79% yield). <sup>1</sup>H NMR (500 MHz, CDCl<sub>3</sub>)  $\delta$  7.33 (d, *J* = 8.6 Hz, 2H), 7.19 – 7.03 (m, 6H), 6.89 (d, *J* = 8.6 Hz, 2H), 6.82 – 6.69 (m, 3H), 5.31 (d, *J* = 8.7 Hz, 1H), 4.18 (d, *J* = 8.8 Hz, 1H), 3.79 (s, 3H), 3.75 (s, 3H), 2.08 (br s, 1H).; <sup>13</sup>C NMR (126 MHz, CDCl<sub>3</sub>):  $\delta$  158.9, 158.5, 142.0, 134.5, 133.1, 129.9, 128.5, 128.2, 128.0, 126.2, 116.0, 114.8, 114.2, 113.4, 76.5, 59.5, 55.8, 55.24, 55.16.; IR (neat):  $\nu_{\text{max}}$  3389.0 (b), 3028.0 (w), 3000.8 (m), 2931.9 (m), 2835.0 (m), 1610.7 (m), 1584.3 (s), 1301.9 (w), 1246.2 (s), 1176.8 (m), 1302.9 (m), 828.5 (m), 699.9 (m) cm<sup>-1</sup>. HRMS (DART) for C<sub>22</sub>H<sub>21</sub>O<sub>2</sub> [M+H-H<sub>2</sub>O]<sup>+</sup>: calculated: 317.152, found: 317.1547. [ $\alpha$ ]<sub>D</sub><sup>20</sup>: -37.908 (c = 0.633, CHCl<sub>3</sub>, *l* = 50 mm).

**Analysis of Stereochemistry:**

Diastereomer ratio was determined by <sup>1</sup>H NMR analysis of the crude reaction mixture. Racemic compound was prepared according to the procedure described above with Pd(OAc)<sub>2</sub> (2 mol%) and 1,3-Bis(diphenylphosphino)propane (2.4 mol%) as the catalyst. Absolute stereochemistry was assigned by analogy (see compounds 26, 31).

*Chiral SFC (Chiralcel OD-H, 15% IPA, 3 mL/min, 100 bar, 35 °C, 210-270 nm) – analysis of (1R,2R)-1,2-bis(4-methoxyphenyl)-2-phenylethan-1-ol.*

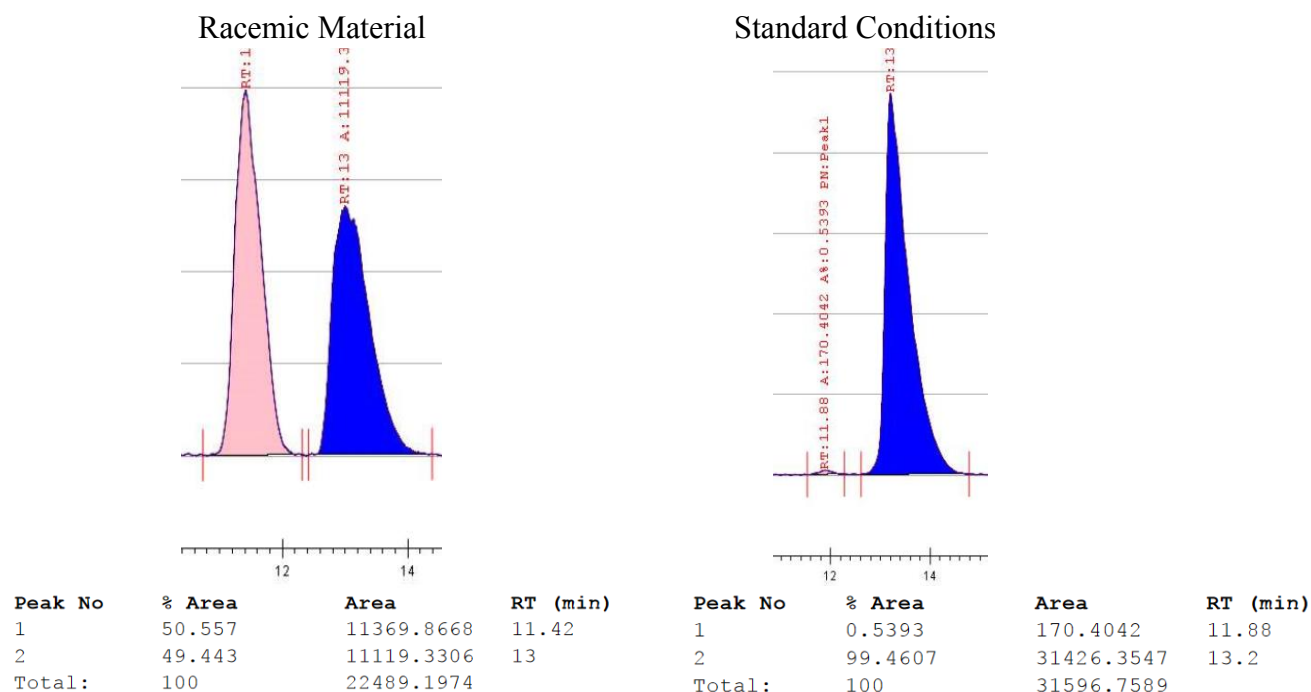



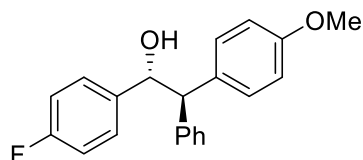

**(1R,2R)-1-(4-fluorophenyl)-2-(4-methoxyphenyl)-2-phenylethan-1-ol (14).**

The reaction was performed according to the general procedure (*Method C*) with styrenyl B(mac) (S-1) (65.2 mg, 0.20 mmol, 1.0 equiv.), 1-bromo-4-fluorobenzene (35.0 mg, 0.20 mmol, 1.0 equiv.), *tert*-butyllithium (1.7 M in pentane, 0.24 mL, 0.40 mmol, 2.0 equiv.), 4-methoxyphenyl trifluoromethanesulfonate (56.4 mg, 0.22 mmol, 1.1 equiv.), palladium (II) acetate (0.90 mg, 4.0  $\mu$ mol, 0.020 equiv.), (*S<sub>p</sub>*, *S<sub>p</sub>*)-**L** (5.0 mg, 4.8  $\mu$ mol), 0.024 equiv.), cesium fluoride (30.4 mg, 0.2 mmol, 1.0 equiv.), and potassium trifluoromethanesulfonate (75.3 mg, 0.40 mmol, 2.0 equiv.) in THF (0.80 mL, 0.25 M). The crude mixture was purified by silica gel chromatography (5-20% EtOAc in hexanes, stain in magic stain) to afford a white solid (45 mg, 70% yield). <sup>1</sup>H NMR (500 MHz, CDCl<sub>3</sub>)  $\delta$  7.32 (d, J = 8.6 Hz, 2H), 7.23 – 7.13 (m, 4H), 7.13 – 7.05 (m, 3H), 6.96 – 6.86 (m, 4H), 5.33 (d, J = 8.8 Hz, 1H), 4.14 (d, J = 8.8 Hz, 1H), 3.80 (s, 3H), 2.16 (br, 1H); <sup>13</sup>C NMR (126 MHz, CDCl<sub>3</sub>):  $\delta$  162.1 (d, <sup>1</sup>J<sub>C-F</sub> = 245.3 Hz), 158.6, 141.6, 138.01, 137.99, 132.5, 129.9, 128.4 (d, <sup>3</sup>J<sub>C-F</sub> = 8.3 Hz), 128.4, 128.3, 126.4, 114.8 (d, <sup>2</sup>J<sub>C-F</sub> = 21.4 Hz), 114.7, 114.3, 76.3, 59.8, 55.2; <sup>19</sup>F NMR (470 MHz, CDCl<sub>3</sub>)  $\delta$  -115.0; IR (neat):  $\nu_{\text{max}}$  3378.7 (br), 3060.3 (w), 3029.1 (m), 2908.1 (m), 2835.9 (m), 1605.9 (m), 1508.8 (s), 1220.3 (m), 1178.9 (m), 1033.6 (m), 699.4 (m), 567.7 (m) cm<sup>-1</sup>. HRMS (DART) for C<sub>21</sub>H<sub>18</sub>FO [M+H-H<sub>2</sub>O]<sup>+</sup>: calculated: 305.1342, found: 305.1342. [ $\alpha$ ]<sub>D</sub><sup>20</sup>: -58.335 (c = 0.813, CHCl<sub>3</sub>, l = 50 mm).

**Analysis of Stereochemistry:**

Diastereomer ratio was determined by <sup>1</sup>H NMR analysis of the crude reaction mixture. Racemic compound was prepared according to the procedure described above with Pd(OAc)<sub>2</sub> (2 mol%) and 1,3-Bis(diphenylphosphino)propane (2.4 mol%) as the catalyst. Absolute stereochemistry was assigned by analogy (see compounds 26, 31).

*Chiral SFC (Chiralcel OD-H, 12% IPA, 3 mL/min, 100 bar, 35 °C, 210-270 nm) – analysis of (1R,2R)-1-(4-fluorophenyl)-2-(4-methoxyphenyl)-2-phenylethan-1-ol.*

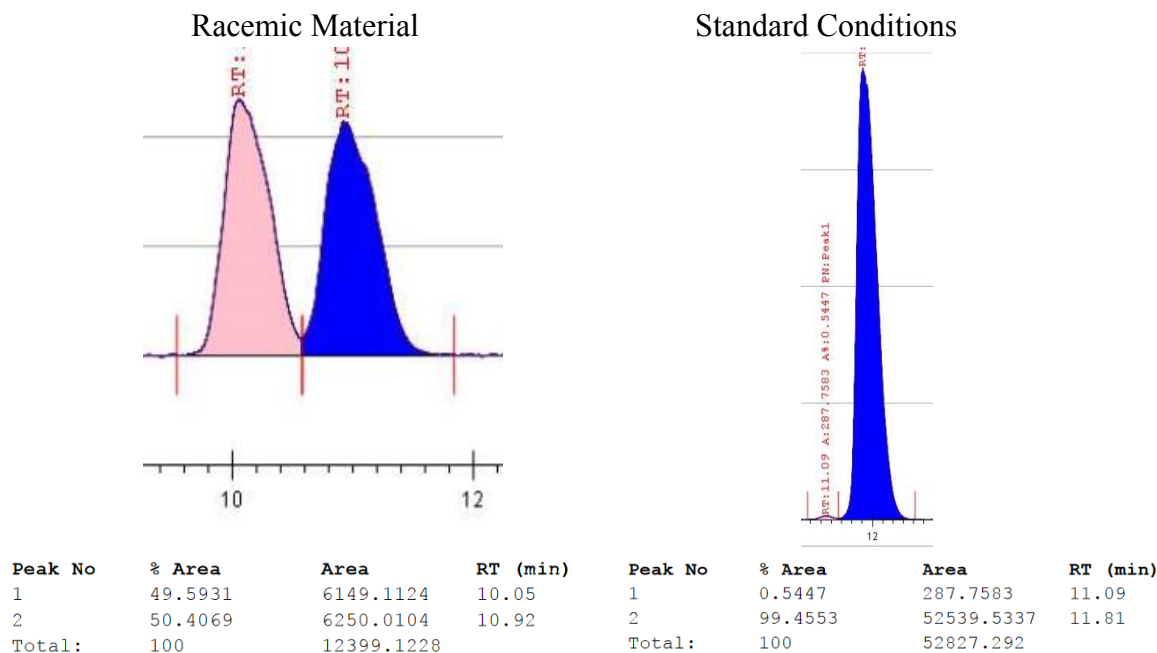

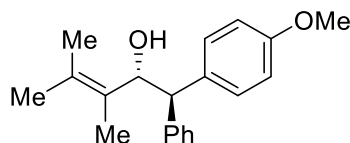**(1R,2R)-1-(4-methoxyphenyl)-3,4-dimethyl-1-phenylpent-3-en-2-ol (15).**

The reaction was performed according to the general procedure (**Method C**) with styrenyl B(mac) (S-1) (65.2 mg, 0.20 mmol, 1.0 equiv.), 2-bromo-3-methyl-but-2-ene (29.8 mg, 0.20 mmol, 1.0 equiv.), *tert*-butyllithium (1.7 M in pentane, 0.24 mL, 0.40 mmol, 2.0 equiv.), 4-methoxyphenyl trifluoromethanesulfonate (56.4 mg, 0.22 mmol, 1.1 equiv.), palladium (II) acetate (0.90 mg, 4.0  $\mu$ mol, 0.020 equiv.), (*S<sub>p</sub>*, *S<sub>p</sub>*)-**L** (5.0 mg, 4.8  $\mu$ mol), 0.024 equiv.), cesium fluoride (30.4 mg, 0.2 mmol, 1.0 equiv.), and potassium trifluoromethanesulfonate (75.3 mg, 0.40 mmol, 2.0 equiv.) in THF (0.80 mL, 0.25 M). The crude mixture was purified by silica gel chromatography (5-20% EtOAc in hexanes, stain in magic stain) to afford a white solid (33 mg, 56% yield). <sup>1</sup>H NMR (500 MHz, CDCl<sub>3</sub>)  $\delta$  7.37 (d, J = 8.6 Hz, 2H), 7.23 – 7.15 (m, 4H), 7.15 – 7.10 (m, 1H), 6.90 (d, J = 8.7 Hz, 2H), 5.28 (d, J = 10.2 Hz, 1H), 4.06 (d, J = 10.1 Hz, 1H), 3.79 (s, 3H), 1.66 (s, 3H), 1.60 (s, 1H), 1.54 (s, 3H), 1.51 (s, 3H); <sup>13</sup>C NMR (126 MHz, CDCl<sub>3</sub>):  $\delta$  158.5, 142.1, 133.7, 129.8, 129.7, 128.1, 127.9, 126.8, 126.2, 114.3, 73.1, 55.7, 55.2, 21.0, 20.1, 12.3; IR (neat):  $\nu_{\text{max}}$  3448.0 (br), 3027.5 (w), 2993.8 (m), 2928.2 (m), 2858.4 (m), 1609.7 (m), 1510.4 (s), 1248.5 (s), 1178.1 (m), 1034.7 (m), 699.5 (m) cm<sup>-1</sup>. HRMS (DART) for C<sub>20</sub>H<sub>23</sub>O [M+H-H<sub>2</sub>O]<sup>+</sup>: calculated: 279.1749, found: 279.1751. [ $\alpha$ ]<sub>D</sub><sup>20</sup>: -8.766 (c = 0.920, CHCl<sub>3</sub>, l = 50 mm).

**Analysis of Stereochemistry:**

Diastereomer ratio was determined by <sup>1</sup>H NMR analysis of the crude reaction mixture. Racemic compound was prepared according to the procedure described above with Pd(OAc)<sub>2</sub> (2 mol%) and 1,3-Bis(diphenylphosphino)propane (2.4 mol%) as the catalyst. Absolute stereochemistry was assigned by analogy (see compounds 26, 31).

*Chiral SFC (Chiralcel ODR-H, 5% IPA, 3 mL/min, 100 bar, 35 °C, 210-270 nm) – analysis of (1R,2R)-1-(4-methoxyphenyl)-3,4-dimethyl-1-phenylpent-3-en-2-ol.*

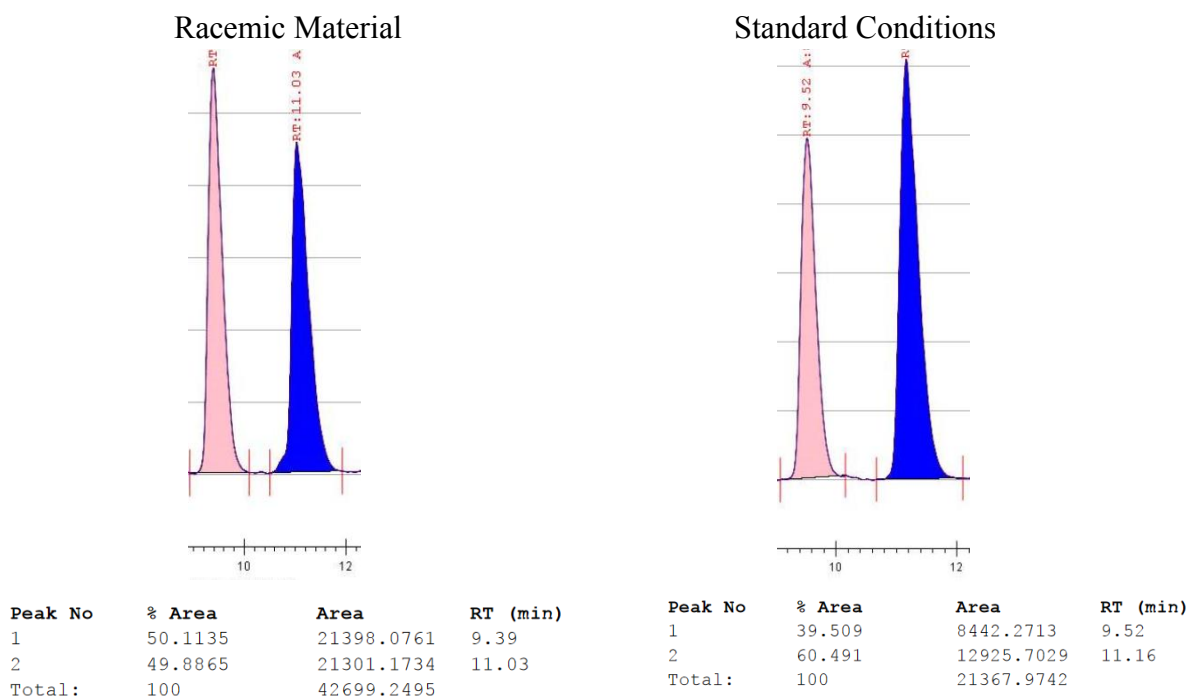



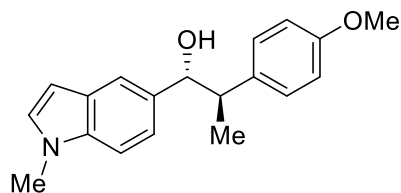

**(1R,2R)-2-(4-methoxyphenyl)-1-(1-methyl-1H-indol-5-yl)propan-1-ol (16).** The reaction was performed according to the general procedure (*Method C*) with (E)-propenyl B(mac) (S-2) (52.8 mg, 0.2 mmol, 1 equiv.), *tert*-butyllithium (1.7 M in pentane, 0.24 mL, 0.40 mmol, 2 equiv.), 5-bromo-1-methylindole (42.0 mg, 0.20 mmol, 1.0 equiv.), palladium (II) acetate (0.90 mg, 0.004 mmol, 0.020 equiv.), (*S<sub>p</sub>*, *S<sub>p</sub>*)-**L** (5.0 mg, 0.0048 mmol, 0.024 equiv.), potassium triflate (75.3 mg, 0.4 mmol, 2 equiv.), and cesium fluoride (30.4 mg, 0.2 mmol, 1 equiv.) in THF (0.8 mL, 0.25 M). The crude mixture was purified by silica gel chromatography (5-20% EtOAc in hexanes, stain in magic stain) to afford a white solid (37.8 mg, 64% yield). <sup>1</sup>H NMR (500 MHz, CDCl<sub>3</sub>) δ 7.62 (d, *J* = 1.5 Hz, 1H), 7.32 (d, *J* = 8.5 Hz, 1H), 7.30 – 7.24 (m, 3H), 7.07 (d, *J* = 3.1 Hz, 1H), 6.92 (d, *J* = 8.6 Hz, 2H), 6.49 (d, *J* = 3.0 Hz, 1H), 4.72 – 4.67 (m, 1H), 3.82 (s, 3H), 3.81 (s, 3H), 3.07 (dq, *J* = 8.9, 7.1 Hz, 1H), 1.86 (d, *J* = 2.1 Hz, 1H), 1.03 (d, *J* = 7.0 Hz, 3H). <sup>13</sup>C NMR (126 MHz, CDCl<sub>3</sub>) δ 158.5, 136.7, 136.2, 133.9, 129.3, 129.1, 128.4, 120.7, 119.7, 114.2, 109.3, 101.2, 80.7, 77.4, 77.2, 76.9, 55.4, 47.7, 33.1, 19.0.; IR (neat): ν<sub>max</sub> 3435.4 (br), 2956.7 (m), 2923.9 (m), 2852.4 (m), 1610.4 (w), 1582.3 (w), 1511.8 (s), 1245.0 (s), 770.3 (m) cm<sup>-1</sup>. HRMS (DART) for C<sub>19</sub>H<sub>21</sub>NO<sub>2</sub> [M+H]<sup>+</sup>: calculated: 296.1645, found: 296.1639. [α]<sub>D</sub><sup>20</sup>: +95.6726 (c = 1.09, CHCl<sub>3</sub>, *l* = 50 mm).

#### Analysis of Stereochemistry:

Diastereomer ratio was determined by <sup>1</sup>H NMR analysis of the crude reaction mixture. Racemic compound was prepared according to the procedure described above with (E)-propenyl B(mac) and Pd(OAc)<sub>2</sub> (2 mol%) and a mixture of (*R<sub>p</sub>*, *R<sub>p</sub>*)-**L** and (*S<sub>p</sub>*, *S<sub>p</sub>*)-**L** (2.4 mol%) as the catalyst. Absolute stereochemistry was assigned by analogy (see compounds 26, 31).

*Chiral SFC (Chiralcel ODR-H, 10% IPA, 3 mL/min, 100 bar, 35 °C, 210-270 nm) – (1R,2R)-2-(4-methoxyphenyl)-1-(1-methyl-1H-indol-5-yl)propan-1-ol.*

Racemic Material

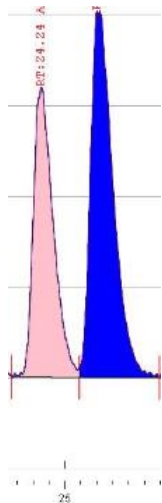

Standard Conditions

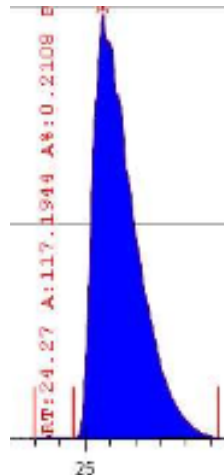

| Peak No | % Area  | Area       | RT (min) | Peak No | % Area  | Area       | RT (min) |
|---------|---------|------------|----------|---------|---------|------------|----------|
| 1       | 41.1283 | 6949.1704  | 24.24    | 1       | 0.2108  | 117.1944   | 24.27    |
| 2       | 58.8717 | 9947.1451  | 26.01    | 2       | 99.7892 | 55478.6465 | 25.36    |
| Total:  | 100     | 16896.3155 |          | Total:  | 100     | 55595.8409 |          |

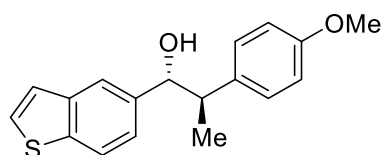

**(1R,2R)-1-(benzo[b]thiophen-5-yl)-2-(4-methoxyphenyl)propan-1-ol (17).** The reaction was performed according to the general procedure (*Method C*) with (E)-propenyl B(mac) (S-2) (52.8 mg, 0.2 mmol, 1 equiv.), *tert*-butyllithium (1.7 M in pentane, 0.24 mL, 0.40 mmol, 2 equiv.), 5-bromobenzothiophene (42.6 mg, 0.20 mmol, 1.0 equiv.), palladium (II) acetate (0.90 mg, 0.004 mmol, 0.020 equiv.), (*S<sub>p</sub>*, *S<sub>p</sub>*)-**L** (5.0 mg, 0.0048 mmol, 0.024 equiv.), potassium triflate (75.3 mg, 0.4 mmol, 2 equiv.), and cesium fluoride (30.4 mg, 0.2 mmol, 1 equiv.) in THF (0.8 mL, 0.25 M). The crude mixture was purified by silica gel chromatography (5–20% EtOAc in hexanes, stain in magic stain) to afford a white solid (35 mg, 59% yield). <sup>1</sup>H NMR (500 MHz, CDCl<sub>3</sub>) δ 7.87 (d, *J* = 8.5 Hz, 1H), 7.81 (s, 1H), 7.46 (d, *J* = 5.4 Hz, 1H), 7.41 – 7.31 (m, 2H), 7.25 (d, *J* = 8.4 Hz, 2H), 6.92 (d, *J* = 8.6 Hz, 2H), 4.72 (d, *J* = 8.7 Hz, 1H), 3.82 (s, 3H), 3.09 – 2.97 (m, 1H), 1.95 (br, 1H), 1.07 (d, *J* = 7.1 Hz, 3H); <sup>13</sup>C NMR (151 MHz, CDCl<sub>3</sub>) δ 158.7, 139.8, 139.3, 139.1, 135.4, 129.2, 126.9, 124.1, 123.5, 122.5, 122.3, 114.3, 80.1, 55.5, 47.7, 18.7; IR (neat): ν<sub>max</sub> 3416 (br), 2961 (m), 2928 (m), 1610 (m), 1583 (w), 1511 (s), 1246 (s), 787 (m) cm<sup>-1</sup>. HRMS (DART) for C<sub>18</sub>H<sub>17</sub>OS [M+H-H<sub>2</sub>O]<sup>+</sup>: calculated: 281.0995, found: 281.1002. [α]<sub>D</sub><sup>20</sup>: +52.99 (c = 1.00, CHCl<sub>3</sub>, *l* = 50 mm).

### Analysis of Stereochemistry:

Diastereomer ratio was determined by <sup>1</sup>H NMR analysis of the crude reaction mixture. Racemic compound was prepared according to the procedure described above with (E)-propenyl B(mac) and Pd(OAc)<sub>2</sub> (2 mol%) and a mixture of (*R<sub>p</sub>*, *R<sub>p</sub>*)-**L** and (*S<sub>p</sub>*, *S<sub>p</sub>*)-**L** (2.4 mol%) as the catalyst. Absolute stereochemistry was assigned by analogy (see compounds 26, 31).

*Chiral SFC (Chiralcel AS-H, 10% IPA, 3 mL/min, 100 bar, 35 °C, 210–270 nm) – (1R,2R)-1-(benzo[b]thiophen-5-yl)-2-(4-methoxyphenyl)propan-1-ol*

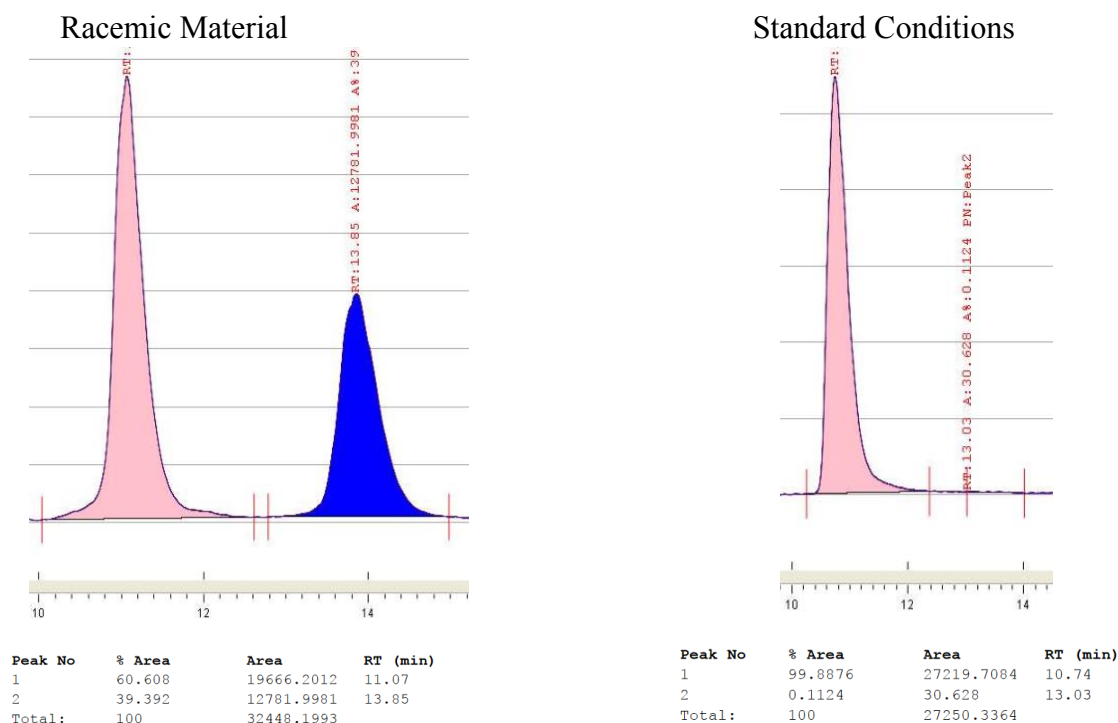

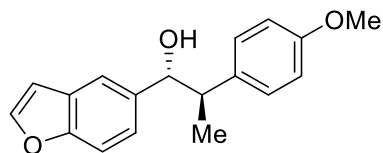

**(1R,2R)-1-(benzofuran-5-yl)-2-(4-methoxyphenyl)propan-1-ol (18).**

The reaction was performed according to the general procedure (**Method C**) with (E)-propenyl B(mac) (S-2) (52.8 mg, 0.2 mmol, 1 equiv.), *tert*-butyllithium (1.7 M in pentane, 0.24 mL, 0.40 mmol, 2 equiv.), 5-bromobenzofuran (39.4 mg, 0.20 mmol, 1.0 equiv.), palladium (II) acetate (0.90 mg, 0.004 mmol, 0.020 equiv.), (*S<sub>p</sub>*, *S<sub>p</sub>*)-**L** (5.0 mg, 0.0048 mmol, 0.024 equiv.), potassium triflate (75.3 mg, 0.4 mmol, 2 equiv.), and cesium fluoride (30.4 mg, 0.2 mmol, 1 equiv.) in THF (0.8 mL, 0.25 M). The crude mixture was purified by silica gel chromatography (5-20% EtOAc in hexanes, stain in magic stain) to afford a white solid (28 mg, 50% yield). <sup>1</sup>H NMR (500 MHz, CDCl<sub>3</sub>) δ 7.67 – 7.57 (m, 2H), 7.49 (d, *J* = 8.5 Hz, 1H), 7.31 (d, *J* = 8.4 Hz, 1H), 7.28 – 7.21 (m, 2H), 6.94 – 6.89 (m, 2H), 6.80 – 6.75 (m, 1H), 4.70 (d, *J* = 8.8 Hz, 1H), 3.82 (s, 3H), 3.08 – 2.94 (m, 1H), 1.93 (br, *J* = 2.1 Hz, 1H), 1.05 (d, *J* = 7.0 Hz, 3H); <sup>13</sup>C NMR (151 MHz, CDCl<sub>3</sub>) δ 158.7, 154.8, 145.5, 137.5, 135.5, 129.2, 127.5, 123.5, 119.8, 114.3, 111.3, 106.8, 80.2, 55.5, 47.9, 18.8; IR (neat): ν<sub>max</sub> 3441(br), 2960 (m), 2927 (m), 1610 (m), 1583 (s), 1467 (m), 1246 (s), 1179 (m), 1032 (s), 741 (m) cm<sup>-1</sup>. HRMS (DART) for C<sub>18</sub>H<sub>17</sub>O<sub>2</sub> [M+H-H<sub>2</sub>O]<sup>+</sup>: calculated: 265.1223, found: 265.1232. [α]<sub>D</sub><sup>20</sup>: +48.50 (c = 0.933, CHCl<sub>3</sub>, *l* = 50 mm).

**Analysis of Stereochemistry:**

Diastereomer ratio was determined by <sup>1</sup>H NMR analysis of the crude reaction mixture. Racemic compound was prepared according to the procedure described above with (E)-propenyl B(mac) and Pd(OAc)<sub>2</sub> (2 mol%) and a mixture of (*R<sub>p</sub>*, *R<sub>p</sub>*)-**L** and (*S<sub>p</sub>*, *S<sub>p</sub>*)-**L** (2.4 mol%) as the catalyst. Absolute stereochemistry was assigned by analogy (see compounds 26, 31).

*Chiral SFC (Chiralcel ODR-H, 8% IPA, 3 mL/min, 100 bar, 35 °C, 210-270 nm) – (1R,2R)-1-(benzofuran-5-yl)-2-(4-methoxyphenyl)propan-1-ol.*

Racemic Material

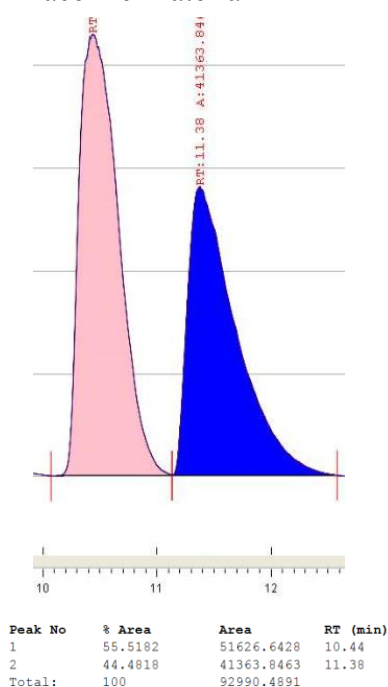

Standard Conditions

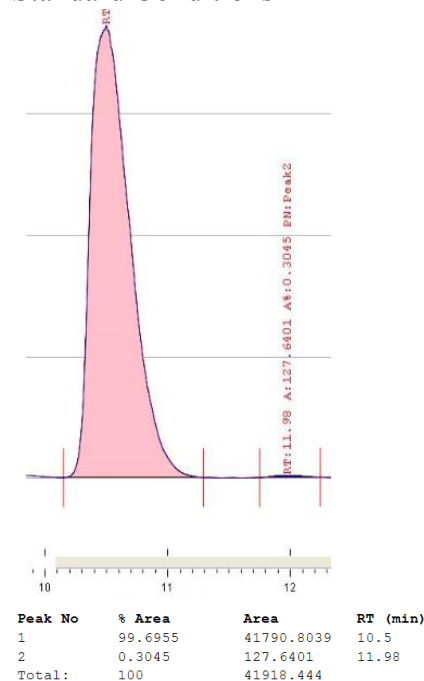

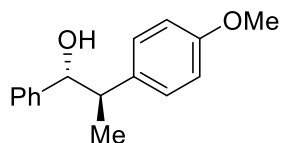

**(1R,2R)-2-(4-methoxyphenyl)-1-phenylpropan-1-ol (19).** The reaction was performed according to the general procedure (**Method A**) with (E)-propenyl B(mac) (S-2) (52.8 mg, 0.20 mmol, 1.0 equiv.), phenyllithium (1.9 M in dibutyl ether, 0.11 mL, .20 mmol, 1.0 equiv.), 4-methoxyphenyl trifluoromethanesulfonate (56.4 mg, 0.22 mmol, 1.1 equiv.), palladium (II) acetate (0.45 mg, 2.0  $\mu$ mol, 0.010 equiv.), (*Sp*, *Sp*)-L (2.5 mg, 2.4  $\mu$ mol), 0.012 equiv.), cesium fluoride (30.4 mg, 0.2 mmol, 1.0 equiv.) in THF (1.60 mL, 0.25 M). The crude mixture was purified by silica gel chromatography (2-20% EtOAc in hexanes, stain in magic stain) to afford a white solid (34 mg, 70% yield).  $^1\text{H}$  NMR (500 MHz,  $\text{CDCl}_3$ )  $\delta$  7.41 – 7.28 (m, 5H), 7.22 (d,  $J$  = 8.7 Hz, 2H), 6.91 (d,  $J$  = 8.7 Hz, 2H), 4.61 (d,  $J$  = 8.6 Hz, 1H), 3.82 (s, 3H), 3.04 – 2.92 (m, 1H), 1.88 (s, 1H), 1.07 (d,  $J$  = 7.1 Hz, 3H).;  $^{13}\text{C}$  NMR (126 MHz,  $\text{CDCl}_3$ ):  $\delta$  158.5, 142.6, 135.2, 129.0, 128.2, 127.7, 127.0, 114.1, 79.8, 55.3, 47.3, 18.4.; IR (neat):  $\nu_{\text{max}}$  3444.8 (br), 3030.4 (w), 2961.7 (m), 2931.5 (m), 2834.8 (w), 1610.5 (w), 1583.1 (s), 1245.5 (s), 1178.3 (m), 1036.7 (m), 724.3 (m)  $\text{cm}^{-1}$ . HRMS (DART) for  $\text{C}_{16}\text{H}_{17}\text{O}$  [ $\text{M}+\text{H}-\text{H}_2\text{O}$ ] $^+$ :calculated: 225.1274, found: 225.1270.  $[\alpha]_{\text{D}}^{20}$ : -69.455 ( $c$  = 1.000,  $\text{CHCl}_3$ ,  $l$  = 50 mm).

### Analysis of Stereochemistry:

Diastereomer ratio was determined by  $^1\text{H}$  NMR analysis of the crude reaction mixture. Racemic compound was prepared according to the procedure described above with (E)-propenyl B(mac), and  $\text{Pd}(\text{OAc})_2$  (2 mol%) and a mixture of (*R<sub>p</sub>*, *R<sub>p</sub>*)-L and (*S<sub>p</sub>*, *S<sub>p</sub>*)-L (2.4 mol%) as the catalyst. Absolute stereochemistry was assigned by analogy (see compounds 26, 31).

Chiral SFC (Chiralcel OJ-H, 10% IPA, 3 mL/min, 100 bar, 35  $^\circ\text{C}$ , 210-270 nm) – analysis of (1R,2R)-2-(4-methoxyphenyl)-1-phenylpropan-1-ol.

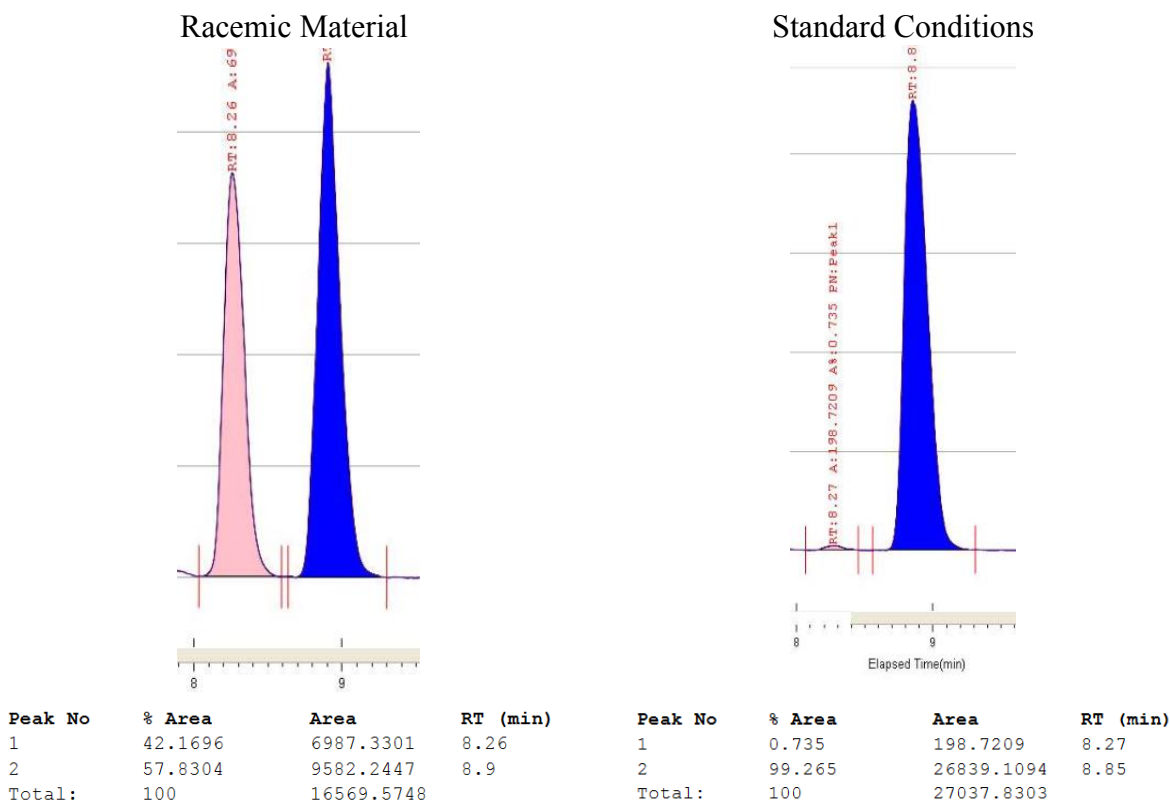

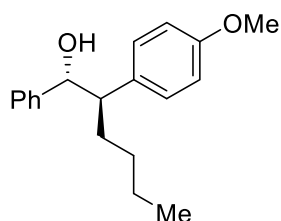

**(1R,2R)-2-(4-methoxyphenyl)-1-phenylhexan-1-ol (20).** The reaction was performed according to the general procedure (**Method A**) with (E)-hexenyl B(mac) (S-3) (61.2 mg, 0.20 mmol, 1.0 equiv.), phenyllithium (1.9 M in dibutyl ether, 0.11 mL, .20 mmol, 1.0 equiv.), 4-methoxyphenyl trifluoromethanesulfonate (56.4 mg, 0.22 mmol, 1.1 equiv.), palladium (II) acetate (0.45 mg, 2.0  $\mu$ mol, 0.010 equiv.), (*Sp*, *Sp*)-L (2.5 mg, 2.4  $\mu$ mol), 0.012 equiv.), cesium fluoride (30.4 mg, 0.2 mmol, 1.0 equiv.) in THF (0.80 mL, 0.25 M). The crude mixture was purified by silica gel chromatography (2-20% EtOAc in hexanes, stain in magic stain) to afford a white solid (36 mg, 63% yield).  $^1\text{H}$  NMR (500 MHz,  $\text{CDCl}_3$ )  $\delta$  7.41 – 7.24 (m, 5H), 7.16 (dd,  $J$  = 8.6, 1.8 Hz, 2H), 6.90 (dd,  $J$  = 8.6, 1.7 Hz, 2H), 4.66 (d,  $J$  = 8.4 Hz, 1H), 3.82 (s, 3H), 2.83 – 2.75 (m, 1H), 1.84 (br, 1H), 1.62 – 1.47 (m, 1H), 1.43 – 1.32 (m, 1H), 1.26 – 1.04 (m, 2H), 1.04 – 0.92 (m, 2H), 0.73 (td,  $J$  = 7.3, 1.6 Hz, 3H).;  $^{13}\text{C}$  NMR (126 MHz,  $\text{CDCl}_3$ ):  $\delta$  158.5, 142.9, 133.1, 129.7, 128.2, 127.6, 127.0, 114.0, 76.8, 55.2, 53.5, 31.7, 29.5, 22.5, 13.9.; IR (neat):  $\nu_{\text{max}}$  3458.4 (br), 2996.4 (m), 2954.1 (m), 2857.2 (m), 1610.0 (m), 1507.1 (s), 1244.8 (s), 1177.1 (m), 1034.9 (m), 700.2 (s)  $\text{cm}^{-1}$ . HRMS (DART) for  $\text{C}_{19}\text{H}_{23}\text{O}$   $[\text{M}+\text{H}-\text{H}_2\text{O}]^+$ : calculated: 267.1749, found: 267.1756.  $[\alpha]_D^{20}$ : +37.172 ( $c$  = 1.300,  $\text{CHCl}_3$ ,  $l$  = 50 mm).

### Analysis of Stereochemistry:

Diastereomer ratio was determined by  $^1\text{H}$  NMR analysis of the crude reaction mixture. Racemic compound was prepared according to the procedure described above with (E)-hexenyl B(mac), and  $\text{Pd}(\text{OAc})_2$  (2 mol%) and 1,3-Bis(diphenylphosphino)propane (2.4 mol%) as the catalyst. Absolute stereochemistry was assigned by analogy (see compounds 26, 31).

Chiral SFC (Chiralcel OJ-H, 5% IPA, 3 mL/min, 100 bar, 35  $^\circ\text{C}$ , 210-270 nm) – analysis of (1R,2R)-2-(4-methoxyphenyl)-1-phenylhexan-1-ol

Racemic Material

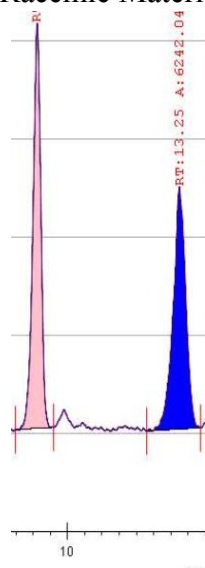

Standard Conditions

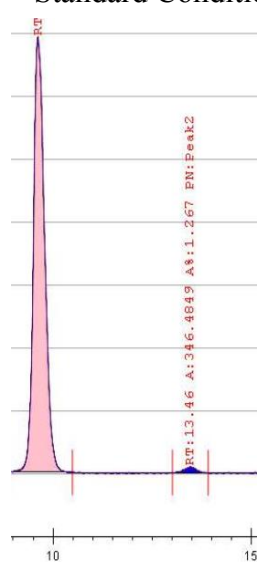

| Peak No | % Area  | Area       | RT (min) |
|---------|---------|------------|----------|
| 1       | 51.3895 | 6598.905   | 9.12     |
| 2       | 48.6105 | 6242.0449  | 13.25    |
| Total:  | 100     | 12840.9499 |          |

| Peak No | % Area | Area       | RT (min) |
|---------|--------|------------|----------|
| 1       | 98.733 | 27000.6134 | 9.62     |
| 2       | 1.267  | 346.4849   | 13.46    |
| Total:  | 100    | 27347.0983 |          |

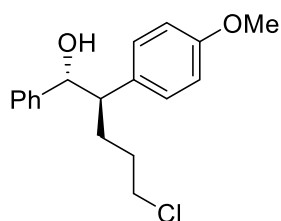**(1R,2R)-5-chloro-2-(4-methoxyphenyl)-1-phenylpentan-1-ol (21).**

The reaction was performed according to the general procedure (*Method A*) with (E)-5-chloro-pentenyl B(mac) (S-4) (65.3 mg, 0.2 mmol, 1.0 equiv.), phenyllithium in dibutyl ether solution (1.9 M) (0.105 mL, 0.2 mmol, 1.0 equiv.), (4-methoxyphenyl) trifluoromethanesulfonate (56.4 mg, 0.22 mmol, 1.10 equiv.), palladium (II) acetate (0.45 mg, 0.002 mmol, 0.010 equiv.), (*S<sub>p</sub>*, *S<sub>p</sub>*)-**L** (2.30 mg, 0.0022 mmol, 0.011 equiv.) and cesium fluoride (30.4 mg, 0.2 mmol, 1 equiv.) in THF (0.8 mL, 0.25 M). The crude mixture was purified by silica gel chromatography (5-20% EtOAc in hexanes, stain in magic stain) to afford a white solid (31.1 mg, 51% yield). <sup>1</sup>H NMR (400 MHz, CDCl<sub>3</sub>) δ 7.36 – 7.25 (m, 5H), 7.17 – 7.11 (m, 2H), 6.91 – 6.85 (m, 2H), 4.65 (d, *J* = 8.2 Hz, 1H), 3.80 (s, 3H), 3.38 – 3.25 (m, 2H), 2.83 – 2.75 (m, 1H), 1.81 (s, 1H), 1.70 – 1.43 (m, 4H). <sup>13</sup>C NMR (126 MHz, CDCl<sub>3</sub>): δ 158.7, 142.5, 132.2, 129.6, 128.3, 127.8, 126.9, 114.2, 78.8, 55.2, 52.9, 44.8, 30.5, 29.3. IR (neat): ν<sub>max</sub> 3466.9 (br), 2995.5 (w), 2953.4 (w), 1609.7 (w), 1510.6 (s), 1453.8 (w), 1301.7 (w), 1247.0 (s), 1178.4 (m), 1034.2 (m), 701.56 (m) cm<sup>-1</sup>. HRMS (DART) for C<sub>18</sub>H<sub>21</sub>ClO<sub>2</sub> [M+H-H<sub>2</sub>O]<sup>+</sup>: calculated: 287.1203, found: 287.1212. [α]<sub>D</sub><sup>20</sup>: +14.145 (c = 0.82, CHCl<sub>3</sub>, *l* = 50 mm).

**Analysis of Stereochemistry:**

Diastereomer ratio was determined by <sup>1</sup>H NMR analysis of the crude reaction mixture. Racemic compound was prepared according to the procedure described above with (E)-5-chloro-pentenyl B(mac), and Pd(OAc)<sub>2</sub> (2 mol%) and a mixture of (*R<sub>p</sub>*, *R<sub>p</sub>*)-**L** and (*S<sub>p</sub>*, *S<sub>p</sub>*)-**L** (2.4 mol%) as the catalyst. Absolute stereochemistry was assigned by analogy (see compounds 26, 31).

*Chiral SFC (Chiralcel ODR-H, 5% IPA, 3 mL/min, 100 bar, 35 °C, 210-270 nm) – analysis of (1R,2R)-5-chloro-2-(4-methoxyphenyl)-1-phenylpentan-1-ol.*

Racemic Material

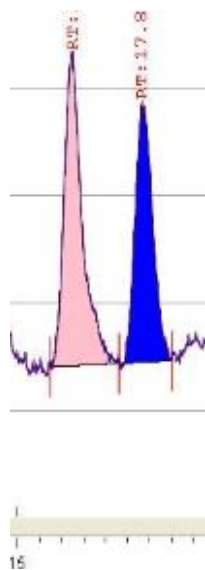

| Peak No | % Area  | Area      | RT (min) |
|---------|---------|-----------|----------|
| 1       | 55.7361 | 839.1701  | 16.25    |
| 2       | 44.2639 | 666.443   | 17.83    |
| Total:  | 100     | 1505.6131 |          |

Standard Conditions

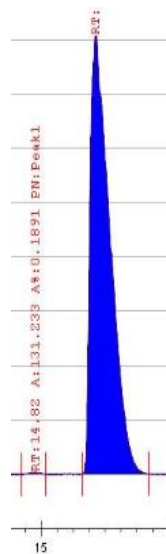

| Peak No | % Area  | Area       | RT (min) |
|---------|---------|------------|----------|
| 1       | 0.1891  | 131.233    | 14.82    |
| 2       | 99.8109 | 69250.2415 | 16.72    |
| Total:  | 100     | 69381.4745 |          |



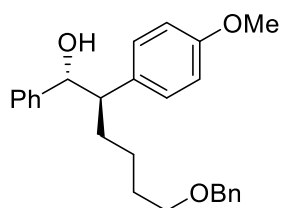**(1R,2R)-6-(benzyloxy)-2-(4-methoxyphenyl)-1-phenylhexan-1-ol (22).**

The reaction was performed according to the general procedure (*Method A*) with (E)-6-(benzyloxy)hexenyl B(mac) (S-5) (82.5 mg, 0.2 mmol, 1.0 equiv.), phenyllithium in dibutylether solution (1.9 M) (0.105 mL, 0.2 mmol, 1.0 equiv.), (4-methoxyphenyl) trifluoromethanesulfonate (56.4 mg, 0.22 mmol, 1.10 equiv.), palladium (II) acetate (0.45 mg, 0.002 mmol, 0.010 equiv.), (*S<sub>p</sub>*, *S<sub>p</sub>*)-L (2.30 mg, 0.0022 mmol, 0.011 equiv.), and cesium fluoride (30.4 mg, 0.2 mmol, 1 equiv.) in THF (0.8 mL, 0.25 M). The crude mixture was purified by silica gel chromatography (5-20% EtOAc in hexanes, stain in magic stain) to afford a white solid (39.1 mg, 50.0% yield). <sup>1</sup>H NMR (500 MHz, CDCl<sub>3</sub>) δ: 7.42 – 7.21 (m, 10H), 7.19 – 7.12 (m, 2H), 6.95 – 6.86 (m, 2H), 4.65 (d, J = 8.4, 2.4 Hz, 1H), 4.38 (s, 2H), 3.82 (s, 3H), 3.35 – 3.24 (m, 2H), 2.87 – 2.73 (m, 1H), 1.82 (s, 1H), 1.61 – 1.34 (m, 4H), 1.18 – 1.01 (m, 2H); <sup>13</sup>C NMR (151 MHz, CDCl<sub>3</sub>) δ 158.6, 142.9, 138.7, 133.0, 129.8, 128.40, 128.37, 127.8, 127.7, 127.6, 127.1, 114.2, 78.9, 72.9, 70.2, 55.3, 53.5, 31.9, 29.6, 24.0; IR (neat): ν<sub>max</sub> 3438.8 (br), 3060.1 (w), 3029.9 (w), 2932.3 (m), 2857.5 (m), 1609.6 (m), 1510 (s), 1453.3 (m), 1245.8 (s), 1177.5 (m), 1093.9 (m), 1029.1 (s), 698.4 (s) cm<sup>-1</sup>. HRMS (DART) for C<sub>26</sub>H<sub>30</sub>O<sub>3</sub> [M+H-H<sub>2</sub>O]<sup>+</sup>: calculated: 373.2168, found: 373.215. [α]<sub>D</sub><sup>20</sup>: +18.497 (c = 0.955, CHCl<sub>3</sub>, l = 50 mm).

**Analysis of Stereochemistry:**

Diastereomer ratio was determined by <sup>1</sup>H NMR analysis of the crude reaction mixture. Racemic compound was prepared according to the procedure described above with (E)-6-(benzyloxy)hexenyl B(mac), and Pd(OAc)<sub>2</sub> (2 mol%) and a mixture of (*R<sub>p</sub>*, *R<sub>p</sub>*)-L and (*S<sub>p</sub>*, *S<sub>p</sub>*)-L (2.4 mol%) as the catalyst. Absolute stereochemistry was assigned by analogy (see compounds 26, 31).

*Chiral SFC (Chiralcel ODR-H, 15% IPA, 3 mL/min, 100 bar, 35 °C, 210-270 nm) – analysis of (1R,2R)-6-(benzyloxy)-2-(4-methoxyphenyl)-1-phenylhexan-1-ol.*

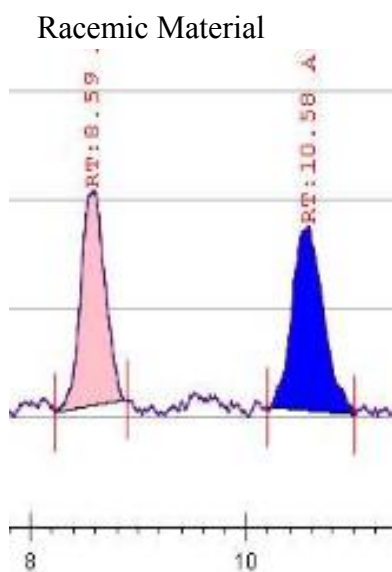

| Peak No | % Area  | Area      | RT (min) |
|---------|---------|-----------|----------|
| 1       | 47.6343 | 616.1072  | 8.59     |
| 2       | 52.3657 | 677.3049  | 10.58    |
| Total:  | 100     | 1293.4121 |          |

Standard Conditions

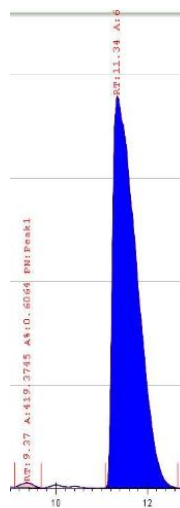

| Peak No | % Area  | Area       | RT (min) |
|---------|---------|------------|----------|
| 1       | 0.6064  | 419.3745   | 9.37     |
| 2       | 99.3936 | 68741.3181 | 11.34    |
| Total:  | 100     | 69160.6926 |          |

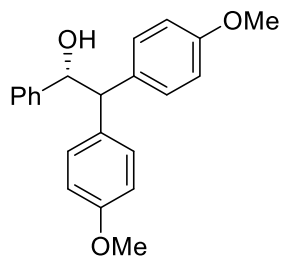

**(R)-2,2-bis(4-methoxyphenyl)-1-phenylethan-1-ol (23).** The reaction was performed according to the general procedure (**Method A**) with 4-methoxy-styrenyl B(mac) (S-6) (71.2 mg, 0.20 mmol, 1.0 equiv.), phenyllithium (1.9 M in dibutyl ether, 0.11 mL, .20 mmol, 1.0 equiv.), 4-methoxyphenyl trifluoromethanesulfonate (56.4 mg, 0.22 mmol, 1.1 equiv.), palladium (II) acetate (0.45 mg, 2.0  $\mu$ mol, 0.010 equiv.), (*Sp*, *Sp*)-L (2.5 mg, 2.4  $\mu$ mol), 0.012 equiv.), cesium fluoride (30.4 mg, 0.2 mmol, 1.0 equiv.) in THF (0.80 mL, 0.25 M). The crude mixture was purified by silica gel chromatography (2-20% EtOAc in hexanes, stain in magic stain) to afford a white solid (32 mg, 48% yield).  $^1\text{H}$  NMR (500 MHz,  $\text{CDCl}_3$ )  $\delta$  7.30 (d,  $J$  = 7.6 Hz, 2H), 7.28 – 7.17 (m, 5H), 7.02 (d,  $J$  = 8.2 Hz, 2H), 6.89 (d,  $J$  = 8.5 Hz, 2H), 6.69 (d,  $J$  = 8.4 Hz, 2H), 5.30 (d,  $J$  = 8.6 Hz, 1H), 4.17 (d,  $J$  = 8.6 Hz, 1H), 3.79 (s, 3H), 3.71 (s, 3H), 2.13 (br, 1H).;  $^{13}\text{C}$  NMR (126 MHz,  $\text{CDCl}_3$ ):  $\delta$  158.5, 157.9, 142.4, 134.1, 133.1, 129.9, 129.4, 128.0, 127.4, 126.9, 114.2, 113.6, 77.0, 58.6, 55.2, 55.1.; IR (neat):  $\nu_{\text{max}}$  3429.1 (br), 3060.9 (w), 3030.9 (w), 2932.3 (m), 2834.9 (m), 1608.3 (m), 1508.8 (s), 1245.1 (s), 1176.8 (m), 1032.8 (m), 814.5 (m), 700.5 (m)  $\text{cm}^{-1}$ . HRMS (DART) for  $\text{C}_{22}\text{H}_{21}\text{O}_2$  [ $\text{M}+\text{H}-\text{H}_2\text{O}$ ] $^+$ : calculated: 317.1536, found: 317.1535.  $[\alpha]_{\text{D}}^{20}$ : -51.455 ( $c$  = 1.105,  $\text{CHCl}_3$ ,  $l$  = 50 mm).

#### Analysis of Stereochemistry:

Racemic compound was prepared according to the procedure described above  $\text{Pd}(\text{OAc})_2$  (2 mol%) and 1,3-Bis(diphenylphosphino)propane (2.4 mol%) as the catalyst. Absolute stereochemistry was assigned by analogy (see compounds 26, 31).

Chiral SFC (Chiralcel OJ-H, 15% IPA, 3 mL/min, 100 bar, 35  $^\circ\text{C}$ , 210-270 nm) – analysis of (R)-2,2-bis(4-methoxyphenyl)-1-phenylethan-1-ol

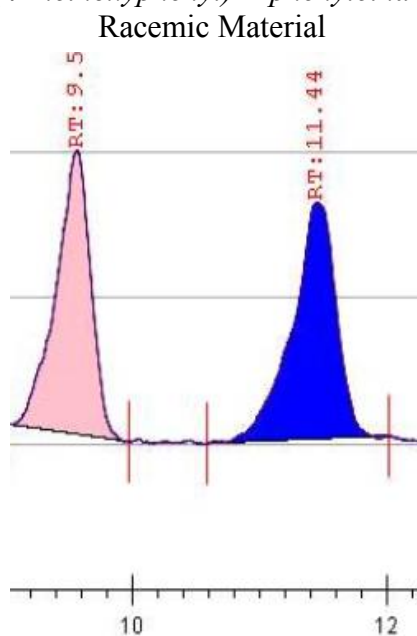

| Peak No | % Area  | Area      | RT (min) |
|---------|---------|-----------|----------|
| 1       | 48.6093 | 3676.123  | 9.57     |
| 2       | 51.3907 | 3886.4641 | 11.44    |
| Total:  | 100     | 7562.5871 |          |

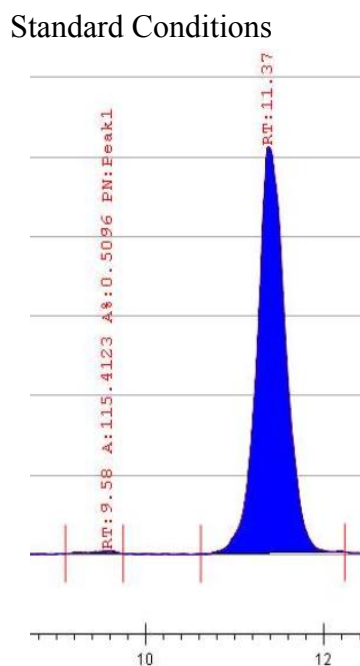

| Peak No | % Area  | Area       | RT (min) |
|---------|---------|------------|----------|
| 1       | 0.5096  | 115.4123   | 9.58     |
| 2       | 99.4904 | 22531.7318 | 11.37    |
| Total:  | 100     | 22647.1441 |          |



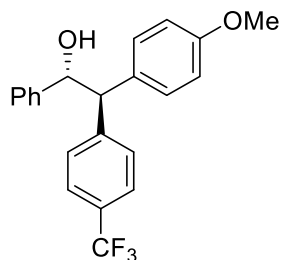

**(1R)-2-(4-methoxyphenyl)-1-phenyl-2-(4-(trifluoromethyl)phenyl)ethan-1-ol (24).** The reaction was performed according to the general procedure (**Method A**) at 60 °C with 4-trifluoromethyl-styrenyl B(mac) (S-7) (78.8 mg, 0.20 mmol, 1.0 equiv.), phenyllithium (1.9 M in dibutyl ether, 0.11 mL, .20 mmol, 1.0 equiv.), 4-methoxyphenyl trifluoromethanesulfonate (56.4 mg, 0.22 mmol, 1.1 equiv.), palladium (II) acetate (1.35 mg, 6.0  $\mu$ mol, 0.030 equiv.), (*Sp*, *Sp*)-L (6.7 mg, 6.4  $\mu$ mol) , 0.032 equiv.), cesium fluoride (30.4 mg, 0.2 mmol, 1.0 equiv.) in THF (0.80 mL, 0.25 M). The crude mixture was purified by silica gel chromatography (2-20% EtOAc in hexanes, stain in magic stain) to afford a yellow oil (51 mg, 69% yield).  $^1\text{H}$  NMR (600 MHz,  $\text{CDCl}_3$ )  $\delta$  7.40 (d,  $J$  = 8.1 Hz, 2H), 7.34 – 7.12 (m, 9H), 6.90 (d,  $J$  = 8.8 Hz, 2H), 5.35 (d,  $J$  = 8.4 Hz, 1H), 4.27 (d,  $J$  = 8.4 Hz, 1H), 3.80 (s, 3H), 2.16 (s, 1H).;  $^{13}\text{C}$  NMR (151 MHz,  $\text{CDCl}_3$ ):  $\delta$  161.4, 148.7, 144.5, 134.5, 132.6, 131.5, 131.2 (q,  $^2J_{\text{C-F}}$  = 32.4 Hz), 130.9, 130.8, 130.5, 129.5, 127.8 (q,  $^3J_{\text{C-F}}$  = 3.9 Hz), 126.8 (q,  $^1J_{\text{C-F}}$  = 271.8 Hz), 117.0, 79.3, 61.8, 57.9.;  $^{19}\text{F}$  NMR (564 MHz,  $\text{CDCl}_3$ ):  $\delta$  -62.48.; IR (neat):  $\nu_{\text{max}}$  3405.1 (br), 3033.4 (w), 2929.2 (m), 2837.9 (w), 1612.4 (m), 1510.8 (s), 1324.0 (s), 1249.5 (s), 1162.8 (s), 1115.1 (s), 1035.4 (s), 814.5 (s), 754.3 (s), 700.4 (s), 605.7 (s)  $\text{cm}^{-1}$ . HRMS (DART) for  $\text{C}_{22}\text{H}_{18}\text{F}_3\text{O}$  [ $\text{M}+\text{H}-\text{H}_2\text{O}$ ] $^+$ : calculated: 355.1310, found: 355.1311.  $[\alpha]_{\text{D}}^{20}$ : -27.50 ( $c$  = 1.115,  $\text{CHCl}_3$ ,  $l$  = 50 mm).

#### Analysis of Stereochemistry:

Diastereomer ratio was determined by  $^1\text{H}$  NMR analysis of the crude reaction mixture. Racemic compound was prepared according to the procedure described above with  $\text{Pd}(\text{OAc})_2$  (2 mol%) and 1,3-Bis(diphenylphosphino)propane (2.4 mol%) as the catalyst. Absolute stereochemistry was assigned by analogy (see compounds 26, 31).

Chiral SFC (Chiralcel OJ-H, 10% IPA, 3 mL/min, 100 bar, 35 °C, 210-270 nm) – analysis of (1R)-2-(4-methoxyphenyl)-1-phenyl-2-(4-(trifluoromethyl)phenyl)ethan-1-ol

Racemic Material

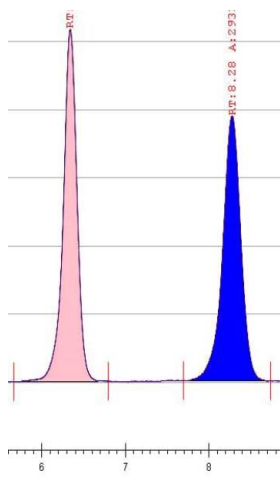

Standard Conditions

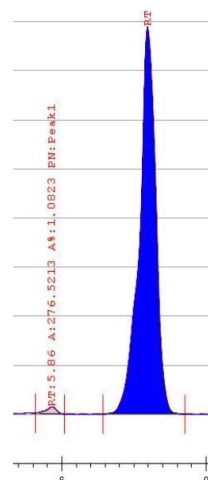

| Peak No | % Area  | Area      | RT (min) | Peak No | % Area  | Area       | RT (min) |
|---------|---------|-----------|----------|---------|---------|------------|----------|
| 1       | 50.2702 | 2965.8056 | 6.34     | 1       | 1.0823  | 276.5213   | 5.86     |
| 2       | 49.7298 | 2933.9292 | 8.28     | 2       | 98.9177 | 25273.2809 | 7.19     |
| Total:  | 100     | 5899.7348 |          | Total:  | 100     | 25549.8022 |          |

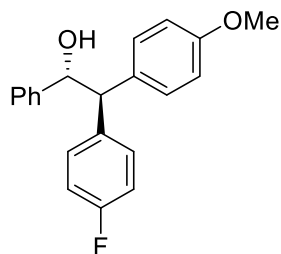

**(1R)-2-(4-fluorophenyl)-2-(4-methoxyphenyl)-1-phenylethan-1-ol (25).** The reaction was performed according to the general procedure (**Method A**) at 60 °C with 4-fluoro-styrenyl B(mac) (S-8) (68.8 mg, 0.20 mmol, 1.0 equiv.), phenyllithium (1.9 M in dibutyl ether, 0.11 mL, .20 mmol, 1.0 equiv.), 4-methoxyphenyl trifluoromethanesulfonate (56.4 mg, 0.22 mmol, 1.1 equiv.), palladium (II) acetate (0.45 mg, 2.0  $\mu$ mol, 0.010 equiv.), (*Sp, Sp*)-L (2.5 mg, 2.4  $\mu$ mol), 0.012 equiv.), cesium fluoride (30.4 mg, 0.2 mmol, 1.0 equiv.) in THF (0.80 mL, 0.25 M). The crude mixture was purified by silica gel chromatography (2-20% EtOAc in hexanes, stain in magic stain) to afford a yellow oil (38 mg, 59% yield).  $^1\text{H}$  NMR (500 MHz,  $\text{CDCl}_3$ )  $\delta$  7.30 (d,  $J$  = 8.6 Hz, 2H), 7.26 – 7.17 (m, 5H), 7.08 – 7.03 (m, 2H), 6.90 (d,  $J$  = 8.9 Hz, 2H), 6.83 (t,  $J$  = 8.6 Hz, 2H), 5.29 (d,  $J$  = 8.6 Hz, 1H), 4.19 (d,  $J$  = 8.7 Hz, 1H), 3.80 (s, 3H), 2.14 (br, 1H).;  $^{13}\text{C}$  NMR (126 MHz,  $\text{CDCl}_3$ ):  $\delta$  161.3 (d,  $^1J_{\text{C-F}}$  = 244.7 Hz), 158.6, 142.2, 137.7, 137.7, 132.6, 129.9 (d,  $^3J_{\text{C-F}}$  = 8.0 Hz), 129.8, 128.1, 127.6, 126.8, 115.0 (d,  $^2J_{\text{C-F}}$  = 21.0 Hz), 114.2, 77.0, 58.7, 55.3.;  $^{19}\text{F}$  NMR (470 MHz,  $\text{CDCl}_3$ ):  $\delta$  -116.7.; IR (neat):  $\nu_{\text{max}}$  3383.7 (br), 3062.4 (w), 3031.9 (w), 2905.6 (w), 2835.8 (w), 1605.4 (s), 1247.9 (m), 1033.8 (m), 819.4 (m), 752.9 (m), 700.4 (m), 576.7 (m)  $\text{cm}^{-1}$ . HRMS (DART) for  $\text{C}_{21}\text{H}_{18}\text{OF}$   $[\text{M}+\text{H}-\text{H}_2\text{O}]^+$ : calculated: 305.1336, found: 305.1369.  $[\alpha]_D^{20}$ : -42.020 ( $c$  = 1.315,  $\text{CHCl}_3$ ,  $l$  = 50 mm).

### Analysis of Stereochemistry:

Diastereomer ratio was determined by  $^1\text{H}$  NMR analysis of the crude reaction mixture. Racemic compound was prepared according to the procedure described above with  $\text{Pd}(\text{OAc})_2$  (2 mol%) and 1,3-Bis(diphenylphosphino)propane (2.4 mol%) as the catalyst. Absolute stereochemistry was assigned by analogy (see compounds 26, 31).

*Chiral SFC (Chiralcel OD-H, 9% IPA, 3 mL/min, 100 bar, 35 °C, 210-270 nm) – analysis of (1R)-2-(4-fluorophenyl)-2-(4-methoxyphenyl)-1-phenylethan-1-ol.*

Racemic Material

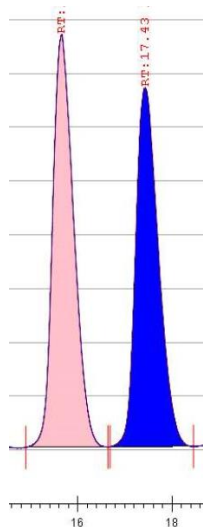

Standard Conditions

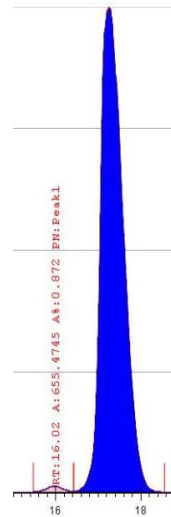

| Peak No | % Area  | Area       | RT (min) |
|---------|---------|------------|----------|
| 1       | 51.6168 | 23769.3094 | 15.65    |
| 2       | 48.3832 | 22280.2598 | 17.43    |
| Total:  | 100     | 46049.5692 |          |

| Peak No | % Area | Area       | RT (min) |
|---------|--------|------------|----------|
| 1       | 0.872  | 655.4745   | 16.02    |
| 2       | 99.128 | 74514.8681 | 17.25    |
| Total:  | 100    | 75170.3426 |          |

## VI. Gram-scale Reaction and Transformations of Products

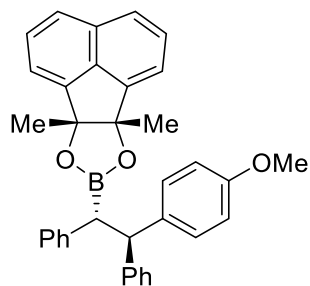

### 8-((1R,2R)-2-(4-methoxyphenyl)-1,2-diphenylethyl)-6b,9a-dimethyl-6b,9a-dihydroacenaphtho[1,2-d][1,3,2]dioxaborole (**26**).

The reaction was performed according to the general procedure (*Method A*) with styrenyl B(mac) (S-1) (1.00 g, 3.07 mmol, 1.0 equiv.), phenyllithium (1.9 M in dibutyl ether, 1.6 mL, 3.07 mmol, 1.0 equiv.), 4-methoxyphenyl trifluoromethanesulfonate (864.0 mg, 3.37 mmol, 1.1 equiv.), palladium (II) acetate (6.9 mg, 30  $\mu$ mol, 0.010 equiv.), (*S<sub>p</sub>*, *S<sub>p</sub>*)-**L** (38.7 mg, 37  $\mu$ mol), 0.012 equiv.), and cesium fluoride (465.7 mg, 3.07 mmol, 1.0 equiv.) in THF (12.3 mL, 0.25 M). The crude mixture was purified by silica gel chromatography (2–10% EtOAc in hexanes, stain in magic stain) to afford a white solid (1.1 g, 70 % yield).  $^1\text{H}$  NMR (500 MHz,  $\text{CDCl}_3$ )  $\delta$  7.72 (d, *J* = 8.1 Hz, 2H), 7.58 – 7.49 (m, 2H), 7.41 (dd, *J* = 16.5, 6.9 Hz, 2H), 7.15 (d, *J* = 7.2 Hz, 2H), 7.09 (t, *J* = 7.6 Hz, 2H), 7.05 – 6.90 (m, 8H), 6.18 (d, *J* = 8.7 Hz, 2H), 4.25 (d, *J* = 12.6 Hz, 1H), 3.61 (s, 3H), 3.15 (d, *J* = 12.6 Hz, 1H), 1.55 (d, *J* = 14.6 Hz, 6H).;  $^{13}\text{C}$  NMR (151 MHz,  $\text{CDCl}_3$ ):  $\delta$  159.9, 147.1, 146.9, 146.8, 143.4, 139.0, 137.4, 137.3, 133.9, 131.8, 131.1, 131.0, 130.84, 130.77, 130.66, 130.5, 130.4, 130.3, 128.2, 127.92, 127.89, 127.7, 127.6, 122.2, 121.8, 121.7, 115.5, 94.5, 94.4, 57.5, 56.7, 24.9, 24.40, 24.35.  $^{11}\text{B}$  NMR (160 MHz,  $\text{CDCl}_3$ )  $\delta$  33.2. IR (neat):  $\nu_{\text{max}}$  3058.3 (w), 3026.7 (w), 2972.6 (w), 2932.0 (w), 1607.0 (m), 1494.3 (m), 1316.6 (m), 1176.6 (m), 1034.5 (m), 846.8 (m), 699.6 (m)  $\text{cm}^{-1}$ . HRMS (DART)  $\text{C}_{35}\text{H}_{35}\text{BO}_3\text{N}$  [ $\text{M}+\text{H}$ ] $^+$ : calculated: 528.2716, found: 528.2725.  $[\alpha]_{\text{D}}^{20}$ : -80.816 (*c* = 0.667,  $\text{CHCl}_3$ , *l* = 50 mm).

### Analysis of Stereochemistry:

Diastereomer ratio was determined by  $^1\text{H}$  NMR analysis of the crude reaction mixture. Racemic compound was prepared according to the procedure described above with  $\text{Pd}(\text{OAc})_2$  (2 mol%) and 1,3-Bis(diphenylphosphino)propane (2.4 mol%) as the catalyst. Enantiomeric ratio was determined by chiral SFC analysis of the corresponding alcohol (see Compound 2b). Absolute stereochemistry was determined by single crystal X-ray diffraction.

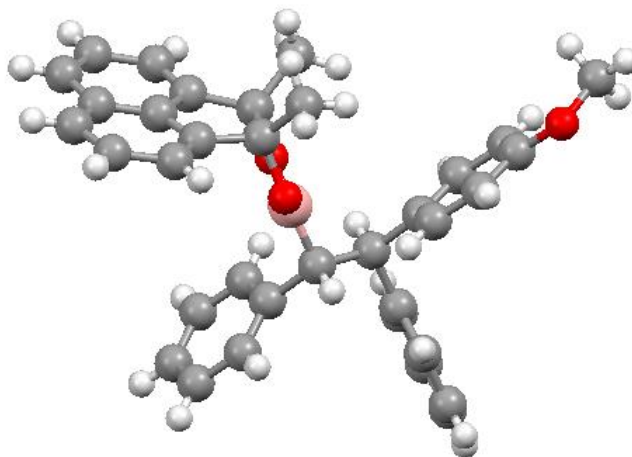

## Oxidation

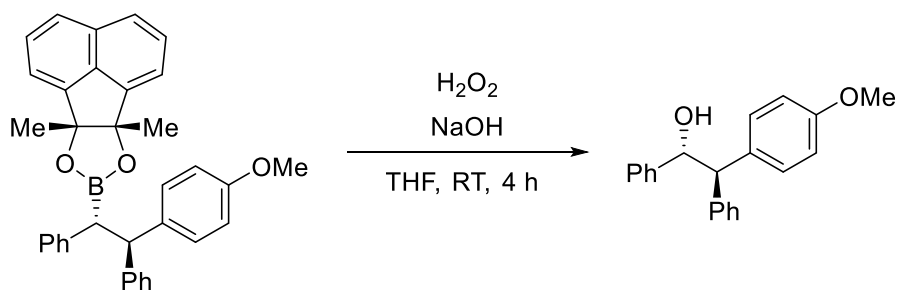

**(1R,2R)-2-(4-methoxyphenyl)-1,2-diphenylethan-1-ol (2b).** 8-((1R,2R)-2-(4-methoxyphenyl)-1,2-diphenylethyl)-6b,9a-dimethyl-6b,9a-dihydroacenaphtho[1,2-d][1,3,2]dioxaborole (26) (51.0 mg, 0.1 mmol, 1.0 equiv.) was dissolved in THF (2 mL) and cooled to 0 °C. 3M NaOH (1.0 mL) was added, followed by 30% H<sub>2</sub>O<sub>2</sub> (0.5 mL), dropwise. The reaction mixture was allowed to stir at room temperature for 4 hours. The reaction mixture was cooled to 0 °C and saturated aq. Na<sub>2</sub>S<sub>2</sub>O<sub>3</sub> solution (3 mL) was added dropwise. After stirring at room temperature for 10 minutes, the reaction mixture was poured into a separatory funnel and the aqueous layer was washed three times with Et<sub>2</sub>O. The combined organic layers were dried over Na<sub>2</sub>SO<sub>4</sub>, filtered, and concentrated under reduced pressure. The crude product was purified by column chromatography with silica gel (silica gel was treated with 2% triethylamine / hexanes prior to use.) (2%-20% EtOAc / hexane, stain in magic stain) to afford the desired product as a white solid (28.0 mg, 92.0% yield).

## Amination

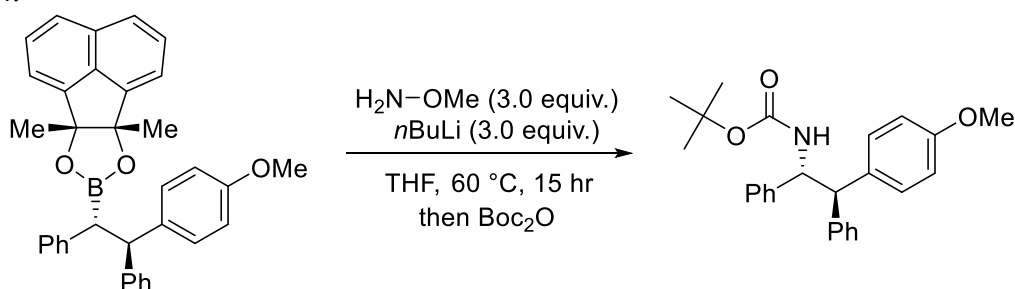

**tert-butyl ((1R,2R)-2-(4-methoxyphenyl)-1,2-diphenylethyl)carbamate (27).** The title compound was prepared according to a literature procedure<sup>11</sup>. A flame-dried, 2-dram vial equipped with a magnetic stir bar and septum was purged with N<sub>2</sub>. After 5 minutes, O-methylhydroxylamine (2 M in THF, 150.00 uL, 0.3 mmol, 3.0 equiv.) was added and diluted with THF (1 mL). The reaction flask was cooled to -78 °C. A solution of n-butyllithium (2.5 M in hexanes, 120.00 uL, 0.3 mmol, 3.0 equiv.) was added dropwise and the reaction was allowed to stir at -78 °C for 30 min. A separate flame-dried 1-dram vial was charged with 8-((1R,2R)-2-(4-methoxyphenyl)-1,2-diphenylethyl)-6b,9a-dimethyl-6b,9a-dihydroacenaphtho[1,2-d][1,3,2]dioxaborole (26) (51.0 mg, .1 mmol, 1.0 equiv.) and diluted with THF (0.5 mL) under N<sub>2</sub>. The solution of boronic ester was then added dropwise to the solution of deprotonated O-methylhydroxylamine dropwise via syringe. The reaction vial was warmed to room temperature and then heated to 60 °C. After stirring at 60 °C for 12 h, the reaction flask was cooled to room temperature and tert-butoxycarbonyl tert-butyl carbonate (1 M in THF, 320.00 uL, 0.32 mmol, 3.2 equiv.) was added and reaction was allowed to stir for 2 h at room temperature. The reaction was filtered through a plug of celite with Et<sub>2</sub>O and concentrated in vacuo to give the crude reaction mixture and subsequently purified by silica gel column chromatography (silica gel was treated

with 2% triethylamine / hexanes prior to use) (5%-20% EtOAc / hexane, stain in magic stain) to afford the desired product as a white solid (36.0 mg, 89.2% yield).  $^1\text{H}$  NMR (500 MHz,  $\text{CDCl}_3$ )  $\delta$  7.23 – 7.01 (m, 12H), 6.87 – 6.80 (m, 2H), 5.35 (br,  $J$  = 59.7 Hz, 1H), 4.86 (br, 1H), 4.17 (d,  $J$  = 9.3 Hz, 1H), 3.78 (s, 3H), 1.32 (s, 9H).  $^{13}\text{C}$  NMR (126 MHz,  $\text{CDCl}_3$ ):  $\delta$  158.4, 155.0, 142.0, 129.8, 128.4, 128.2, 128.0, 127.0, 126.9, 126.3, 113.9, 57.3, 55.2, 28.3.; IR (neat):  $\nu_{\text{max}}$  3402.9 (m), 3029.3 (w), 2975.3 (m), 2934.1 (w), 1682.8 (s), 1511.6 (s), 1248.6 (m), 1169.4 (m), 1015.3 (m), 696.5 (m)  $\text{cm}^{-1}$ . HRMS (DART) for  $\text{C}_{26}\text{H}_{30}\text{NO}_3$   $[\text{M}+\text{H}]^+$ : calculated: 404.2226, found: 404.2226.  $[\alpha]^{20}_{\text{D}}$ : -66.337 ( $c$  = 1.150,  $\text{CHCl}_3$ ,  $l$  = 50 mm).

#### Analysis of Stereochemistry:

The enantiospecificity was determined by the diastereomer ratio (>20:1) as detected by  $^1\text{H}$  NMR.

#### Homologation

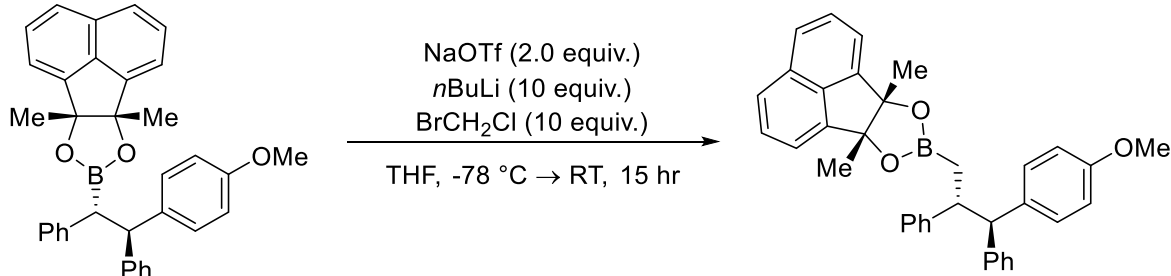

**8-((2R,3R)-3-(4-methoxyphenyl)-2,3-diphenylpropyl)-6b,9a-dimethyl-6b,9a-dihydroacenaphtho[1,2-d][1,3,2]dioxaborole (28).** The title compound was prepared according to a literature procedure with slight modification.<sup>12</sup> In an argon-filled glovebox, an oven-dried 2-dram equipped with magnetic stir bar was charged with 8-((1R,2R)-2-(4-methoxyphenyl)-1,2-diphenylethyl)-6b,9a-dimethyl-6b,9a-dihydroacenaphtho[1,2-d][1,3,2]dioxaborole (26) (51.0 mg, 0.1 mmol, 1.0 equiv.), sodium triflate (34.4 mg, 0.2 mmol, 2.0 equiv.), bromo(chloro)methane (129.4 mg, 1.0 mmol, 10 equiv.), and THF (0.75 mL). The vial was sealed with a septum cap and removed from glovebox. The reaction was cooled to  $-78\text{ }^\circ\text{C}$  and *n*-butyllithium (2.5 M in hexane, 400.00  $\mu\text{L}$ , 1.0 mmol, 10 equiv.) was added dropwise. The resulting mixture was stirred for 1 hour at  $-78\text{ }^\circ\text{C}$ , then allowed to slowly warm to room temperature and stirred overnight. The reaction was filtered through a plug of celite with  $\text{Et}_2\text{O}$  and concentrated in vacuo. The crude product was purified by silica gel column chromatography (2%-5% EtOAc / hexane, stain in magic stain) to afford the desired product as a white solid (44.0 mg, 83.9% yield).  $^1\text{H}$  NMR (600 MHz,  $\text{CDCl}_3$ )  $\delta$  7.76 (dd,  $J$  = 5.1, 3.1 Hz, 2H), 7.56 (dt,  $J$  = 8.2, 7.1 Hz, 2H), 7.46 (ddd,  $J$  = 11.0, 6.9, 0.8 Hz, 2H), 7.32 – 7.23 (m, 2H), 7.17 – 7.08 (m, 2H), 7.08 – 7.00 (m, 4H), 6.98 – 6.90 (m, 1H), 6.90 – 6.78 (m, 3H), 6.75 (dd,  $J$  = 204.7, 8.8 Hz, 2H), 4.04 (d,  $J$  = 11.4 Hz, 1H), 3.72 (s, 3H), 3.62 (td,  $J$  = 11.1, 4.6 Hz, 1H), 1.54 (s, 3H), 1.48 (s, 3H), 1.11 (dd,  $J$  = 15.0, 4.6 Hz, 1H), 0.99 (dd,  $J$  = 15.1, 11.1 Hz, 1H).;  $^{13}\text{C}$  NMR (151 MHz,  $\text{CDCl}_3$ ):  $\delta$  160.5, 147.40, 147.37, 147.32, 146.8, 139.0, 137.2, 134.0, 132.0, 131.0, 130.9, 130.6, 130.5, 130.1, 128.1, 128.1, 127.7, 121.88, 121.85, 116.5, 94.2, 94.1, 79.9, 79.7, 79.5, 61.8, 57.8, 48.7, 24.5, 24.3.; IR (neat):  $\nu_{\text{max}}$  3059.9 (m), 3027.5 (m), 2970.5 (m), 2931.8 (m), 1608.9 (s), 1582.9 (s), 1357.0 (s), 1250.1 (s), 1175.5 (m), 1077.3 (m), 806.8 (m), 724.7 (s), 667.3 (s)  $\text{cm}^{-1}$ . HRMS (DART) for  $\text{C}_{36}\text{H}_{37}\text{BO}_3\text{N}$   $[\text{M}+\text{NH}_4]^+$ : calculated: 542.2866, found: 542.2894.  $[\alpha]^{20}_{\text{D}}$ : +20.029 ( $c$  = 1.000,  $\text{CHCl}_3$ ,  $l$  = 50 mm).

#### Analysis of Stereochemistry:

The enantiospecificity was determined by the diastereomer ratio (>20:1) as detected by  $^1\text{H}$  NMR.

## VII. Synthesis of (+)-Obtusafuran (31)

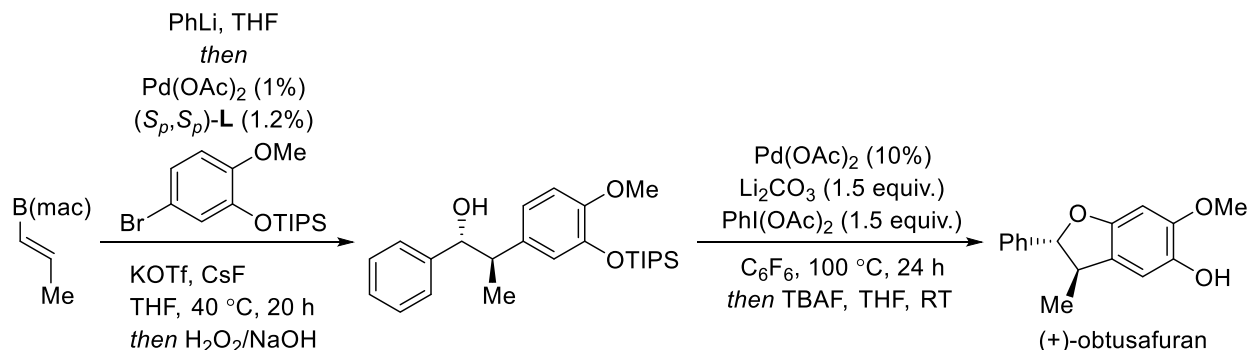

**(1R,2R)-2-(4-methoxy-3-((triisopropylsilyl)oxy)phenyl)-1-phenylpropan-1-ol (30).** The reaction was performed according to the general procedure (**Method B**) with (E)-propenyl B(mac) (S-2) (52.8 mg, 0.2 mmol, 1.0 equiv.), phenyllithium (1.9 M in dibutyl ether, 0.11 mL, 0.20 mmol, 1.0 equiv.), (5-bromo-2-methoxyphenoxy)triisopropylsilane (79.1 mg, 0.22 mmol, 1.1 equiv.), palladium (II) acetate (0.45 mg, 0.002 mmol, 0.010 equiv.), (S<sub>p</sub>, S<sub>p</sub>)-L (2.5 mg, 0.0024 mmol, 0.012 equiv.), potassium triflate (37.6 mg, 0.2 mmol, 1.0 equiv.), and cesium fluoride (30.4 mg, 0.2 mmol, 1.0 equiv.) in THF (0.8 mL, 0.25 M). The crude mixture was purified by silica gel chromatography (5-20% EtOAc in hexanes, stain in magic stain) to afford a white solid (56 mg, 68% yield). <sup>1</sup>H NMR (600 MHz, CDCl<sub>3</sub>) δ 7.40 – 7.31 (m, 4H), 7.31 – 7.23 (m, 1H), 6.86 – 6.76 (m, 3H), 4.57 (d, *J* = 8.3 Hz, 1H), 3.80 (s, 3H), 2.91 (q, *J* = 7.4 Hz, 1H), 1.90 (br, 1H), 1.35 – 1.18 (m, 3H), 1.18 – 0.98 (m, 21H). <sup>13</sup>C NMR (151 MHz, CDCl<sub>3</sub>) δ 150.1, 145.8, 142.6, 135.5, 128.4, 127.8, 127.13, 121.07, 120.3, 112.4, 79.8, 55.7, 47.7, 18.4, 18.11, 18.08, 18.05, 13.1. IR (neat): ν<sub>max</sub> 2943, 2866, 1509, 1443, 1278, 1165, 1029, 883, 700 cm<sup>-1</sup>. HRMS (DART) for C<sub>25</sub>H<sub>39</sub>O<sub>3</sub>Si [M+H]<sup>+</sup>: calculated: 415.2663, found: 415.2659. [α]<sub>D</sub><sup>20</sup>: +37.25 (c = 1.02, CHCl<sub>3</sub>, *l* = 50 mm).

**Analysis of Stereochemistry:**

Diastereomer ratio was determined by <sup>1</sup>H NMR analysis of the crude reaction mixture. Absolute stereochemistry was assigned by analogy (see compounds 26, 31).

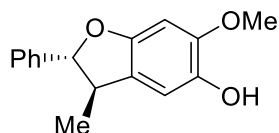

**(2R,3R)-6-methoxy-3-methyl-2-phenyl-2,3-dihydrobenzofuran-5-ol ((+)-obtusafuran) (31).** The reaction was performed according to a literature procedure.<sup>13</sup> In an argon-filled glovebox, to an oven-dried 1-dram vial was added 2-(4-methoxy-3-triisopropylsilyloxy-phenyl)-1-phenyl-propan-1-ol (56 mg, 135  $\mu$ mol, 1.0 equiv.), lithium carbonate (14.97 mg, 203  $\mu$ mol, 1.5 equiv.), diacetoxyiodobenzene (64.84 mg, 203  $\mu$ mol, 1.5 equiv.), palladium (II) acetate (3mg, 14  $\mu$ mol, 0.10 equiv.), and hexafluorobenzene (0.14 mL, 1 M). The vial was sealed with a screwcap and placed in a 100 °C oil bath. After stirring at this temperature for 24 hours, the reaction was cooled down to room temperature and filtered through a plug of silica gel with Et<sub>2</sub>O. The crude mixture was concentrated, then dissolved in THF (0.54 mL). Tetrabutylammonium fluoride hydrate (53 mg, 203  $\mu$ mol, 1.5 equiv.) was added and the reaction was stirred at room temperature for 24 hours then filtered through a plug of silica gel with Et<sub>2</sub>O. The solvent was evaporated and the crude product was purified by silica gel chromatography (5-20% EtOAc in hexanes, stain in magic stain) to afford a white solid (14 mg, 54  $\mu$ mol, 40% yield). <sup>1</sup>H NMR (500 MHz, CDCl<sub>3</sub>)  $\delta$  7.48 – 7.29 (m, 5H), 6.73 (s, 1H), 6.51 (s, 1H), 5.28 (s, 1H), 5.12 (d,  $J$  = 8.5 Hz, 1H), 3.87 (s, 3H), 3.45 – 3.32 (m, 1H), 1.39 (d,  $J$  = 6.8 Hz, 3H). <sup>13</sup>C NMR (126 MHz, CDCl<sub>3</sub>)  $\delta$  152.6, 146.4, 141.2, 140.1, 128.8, 128.7, 128.3, 126.3, 126.2, 123.1, 109.7, 94.4, 93.0, 56.4, 45.9, 18.6. [ $\alpha$ ]<sub>D</sub><sup>20</sup>: +56.2 ( $c$  = 0.90, MeOH,  $l$  = 50 mm).

#### Analysis of Stereochemistry:

Racemic compound was prepared according to a literature procedure.<sup>14</sup> Absolute stereochemistry was determined by comparison of optical rotation to the literature<sup>15</sup> (Measured: [ $\alpha$ ]<sub>D</sub><sup>20</sup>: +56.2 ( $c$  = 0.90, MeOH,  $l$  = 50 mm), literature: [ $\alpha$ ]<sub>D</sub><sup>20</sup>: +50 ( $c$  = 0.33, MeOH), 99:1 *er* for (2R,3R)-6-methoxy-3-methyl-2-phenyl-2,3-dihydrobenzofuran-5-ol), and the absolute stereochemistry was assigned to be (2R,3R)-6-methoxy-3-methyl-2-phenyl-2,3-dihydrobenzofuran-5-ol.

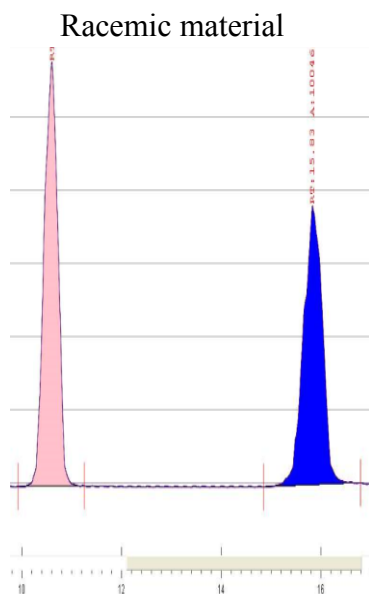

| Peak No | % Area | Area       | RT (min) |
|---------|--------|------------|----------|
| 1       | 52.64  | 11166.1069 | 10.61    |
| 2       | 47.36  | 10046.088  | 15.83    |
| Total:  | 100    | 21212.1949 |          |

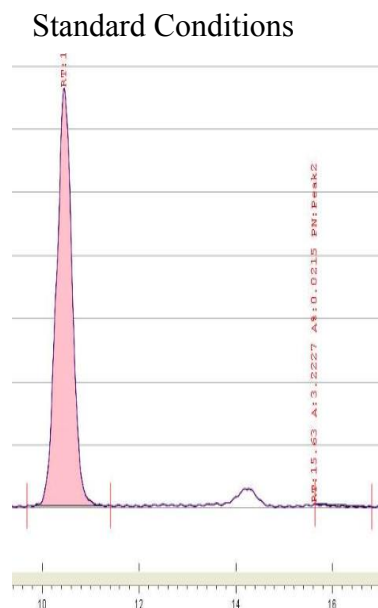

| Peak No | % Area  | Area       | RT (min) |
|---------|---------|------------|----------|
| 1       | 99.9785 | 14956.6731 | 10.45    |
| 2       | 0.0215  | 3.2227     | 15.63    |
| Total:  | 100     | 14959.8958 |          |

## References

- (1) Holt, D.; Gaunt, M. J. Copper-Catalyzed Oxy-Alkenylation of Homoallylic Alcohols to Generate Functional syn-1,3-Diol Derivatives. *Angew. Chem. Int. Ed.* **2015**, *54*, 7857.
- (2) Wood, J. L.; Marciasini, L. D.; Vaultier, M.; Pucheault, M. Iron Catalysis and Water: A Synergy for Refunctionalization of Boron. *Synlett* **2014**, *25*, 551.
- (3) Liu, Z.; Wei, W.; Xiong, L.; Feng, Q.; Shi, Y.; Wang, N.; Yu, L. Selective and Efficient Synthesis of *trans*-Arylvinylboronates and *trans*-Hetarylvinylboronates Using Palladium Catalyzed Cross-Coupling. *New J. Chem.*, **2017**, *41*, 3172.
- (4) Kobayashi, Y.; Nakayama, Y.; Mizojiri, R. Nickel-Catalyzed Coupling Reaction of Sterically Congested *cis* Bromides and Lithium Alkenylborates. *Tetrahedron* **1998**, *54*, 1053.
- (5) Shing, T. K. M.; Tam, E. K. W.; Tai, V. W.-F.; Chung, I. H. F.; Jiang, Q. Ruthenium-Catalyzed *cis*-Dihydroxylation of Alkenes: Scope and Limitations. *Chem. Eur. J.*, **1996**, *2*, 50.
- (6) Pereira, S.; Srebnik, M. Hydroboration of Alkynes with Pinacolborane Catalyzed by HZrCp<sub>2</sub>Cl. *Organometallics* **1995**, *14*, 3127.
- (7) Tucker, C. E.; Davidson, J.; Knochel, P. Mild and Stereoselective Hydroborations of Functionalized Alkynes and Alkenes Using Pinacolborane. *J. Org. Chem.* **1992**, *57*, 3482.
- (8) Doi, R.; Shibuya, M.; Murayama, T.; Yamamoto, Y.; Iwabuchi, Y. Development of an Azanoradamantane-Type Nitroxyl Radical Catalyst for Class-Selective Oxidation of Alcohols. *J. Org. Chem.* **2015**, *80*, 401.
- (9) Chanteau, S. H.; Tour, J. M. Synthesis of Anthropomorphic Molecules: The NanoPutians. *J. Org. Chem.*, **2003**, *68*, 8750.
- (10) Zhao, H.; Li, D.-J.; Deng, L. Liu, L.; Guo, Q.-X. A Novel, Solventless Reductive Coupling of Carbonyl Compounds by Alkali Metals, Catalysed by Bromobenzene. *Chem. Commun.*, **2003**, 506.
- (11) Mlynarski, S. N.; Karns, A. S.; Morken, J. P. Direct Stereospecific Amination of Alkyl and Aryl Pinacol Boronates. *J. Am. Chem. Soc.*, **2012**, *134*, 16449.
- (12) Sonawane, R. P.; Jheengut, V.; Rabalakos, C.; Larouche-Gauthier, R.; Scott, H. K.; Aggarwal, V. K. Enantioselective Construction of Quaternary Stereogenic Centers from Tertiary Boronic Esters: Methodology and Applications. *Angew. Chem. Int. Ed.* **2011**, *50*, 3760.
- (13) (a) Wang, X.; Lu, Y.; Dai, H.-X.; Yu, J.-Q. Pd(II)-Catalyzed Hydroxyl-Directed C–H Activation/C–O Cyclization: Expedient Construction of Dihydrobenzofurans. *J. Am. Chem. Soc.*, **2010**, *132*, 12203. (b) Wang, H.; Li, G.; Engle, K. M.; Yu, J.-Q.; Davies, H. M. L. Sequential C–H Functionalization Reactions for the Enantioselective Synthesis of Highly Functionalized 2,3-Dihydrobenzofurans. *J. Am. Chem. Soc.*, **2013**, *135*, 6774.
- (14) Engler, T. A.; Combrink, K. D.; Letavic, M. A.; Lynch Jr., K. O.; Ray, J. E. Stereospecific Lewis Acid-Promoted Reactions of Styrenyl Systems with 2-Alkoxy-(6-Alkyl)-1,4-Benzoquinones: Scope, Limitations, and Synthetic Applications. *J. Org. Chem.* **1994**, *59*, 6567.
- (15) Chen, C.; Weisel, M. Concise Asymmetric Synthesis of (+)-Conocarpan and Obtusafuran. *Synlett* **2013**, 189.



<sup>1</sup>H NMR (CDCl<sub>3</sub>, 600 MHz)

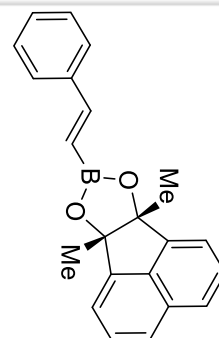

S-1

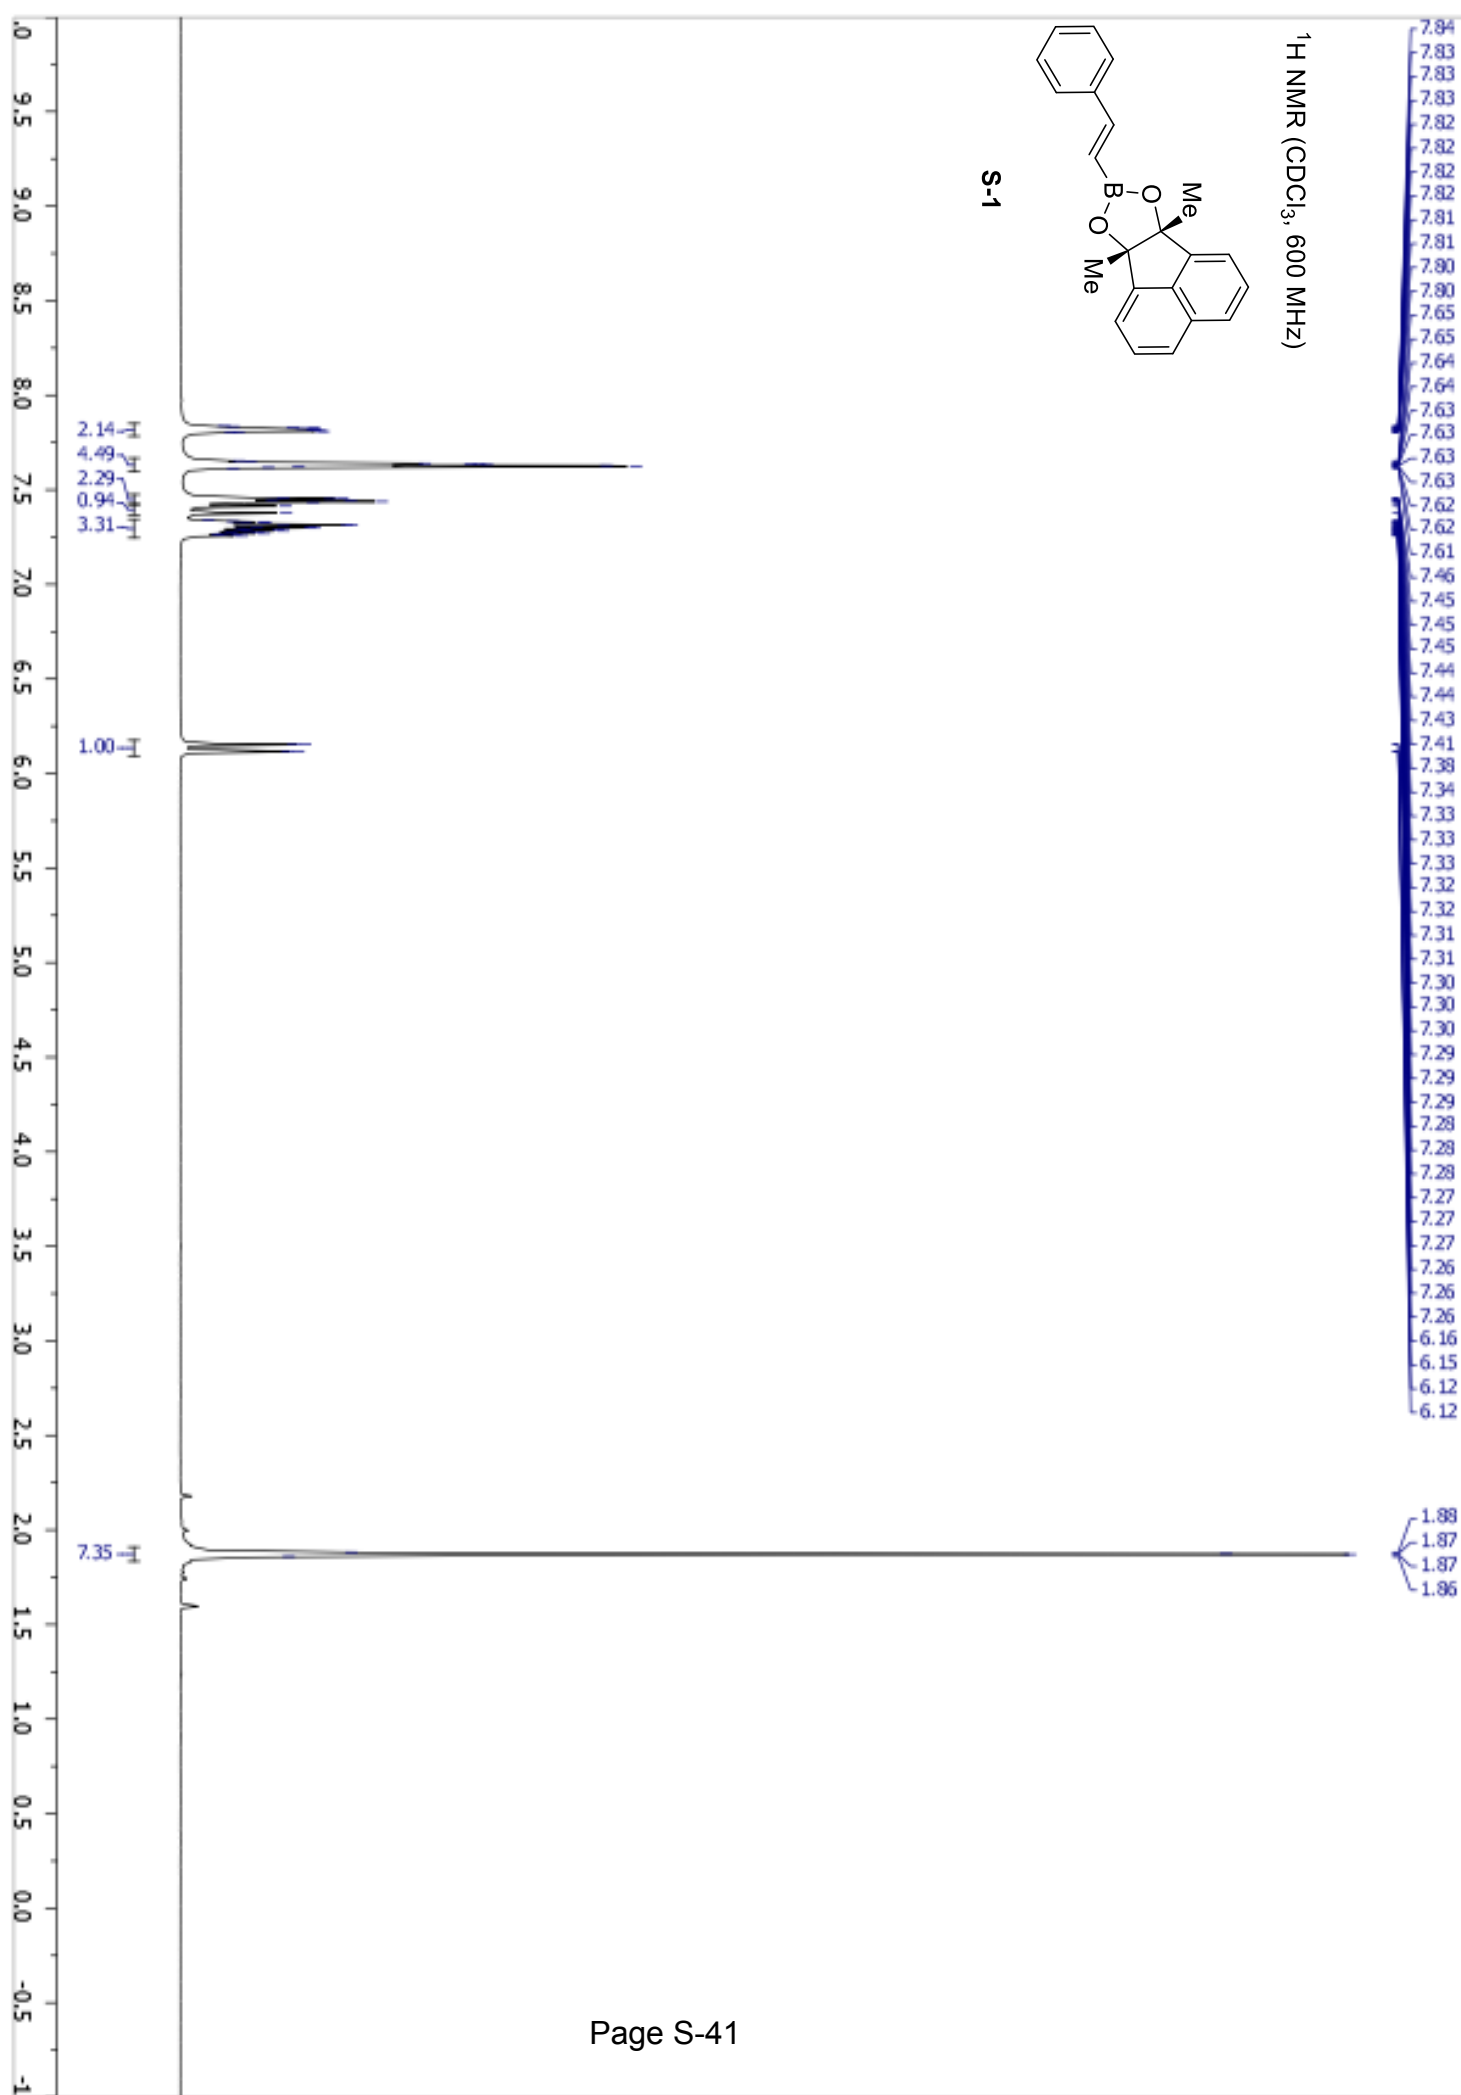

<sup>13</sup>C NMR (CDCl<sub>3</sub>, 151 MHz)

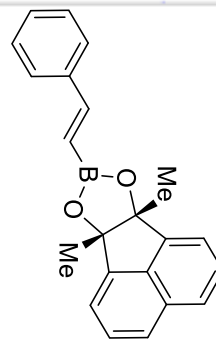

S-1

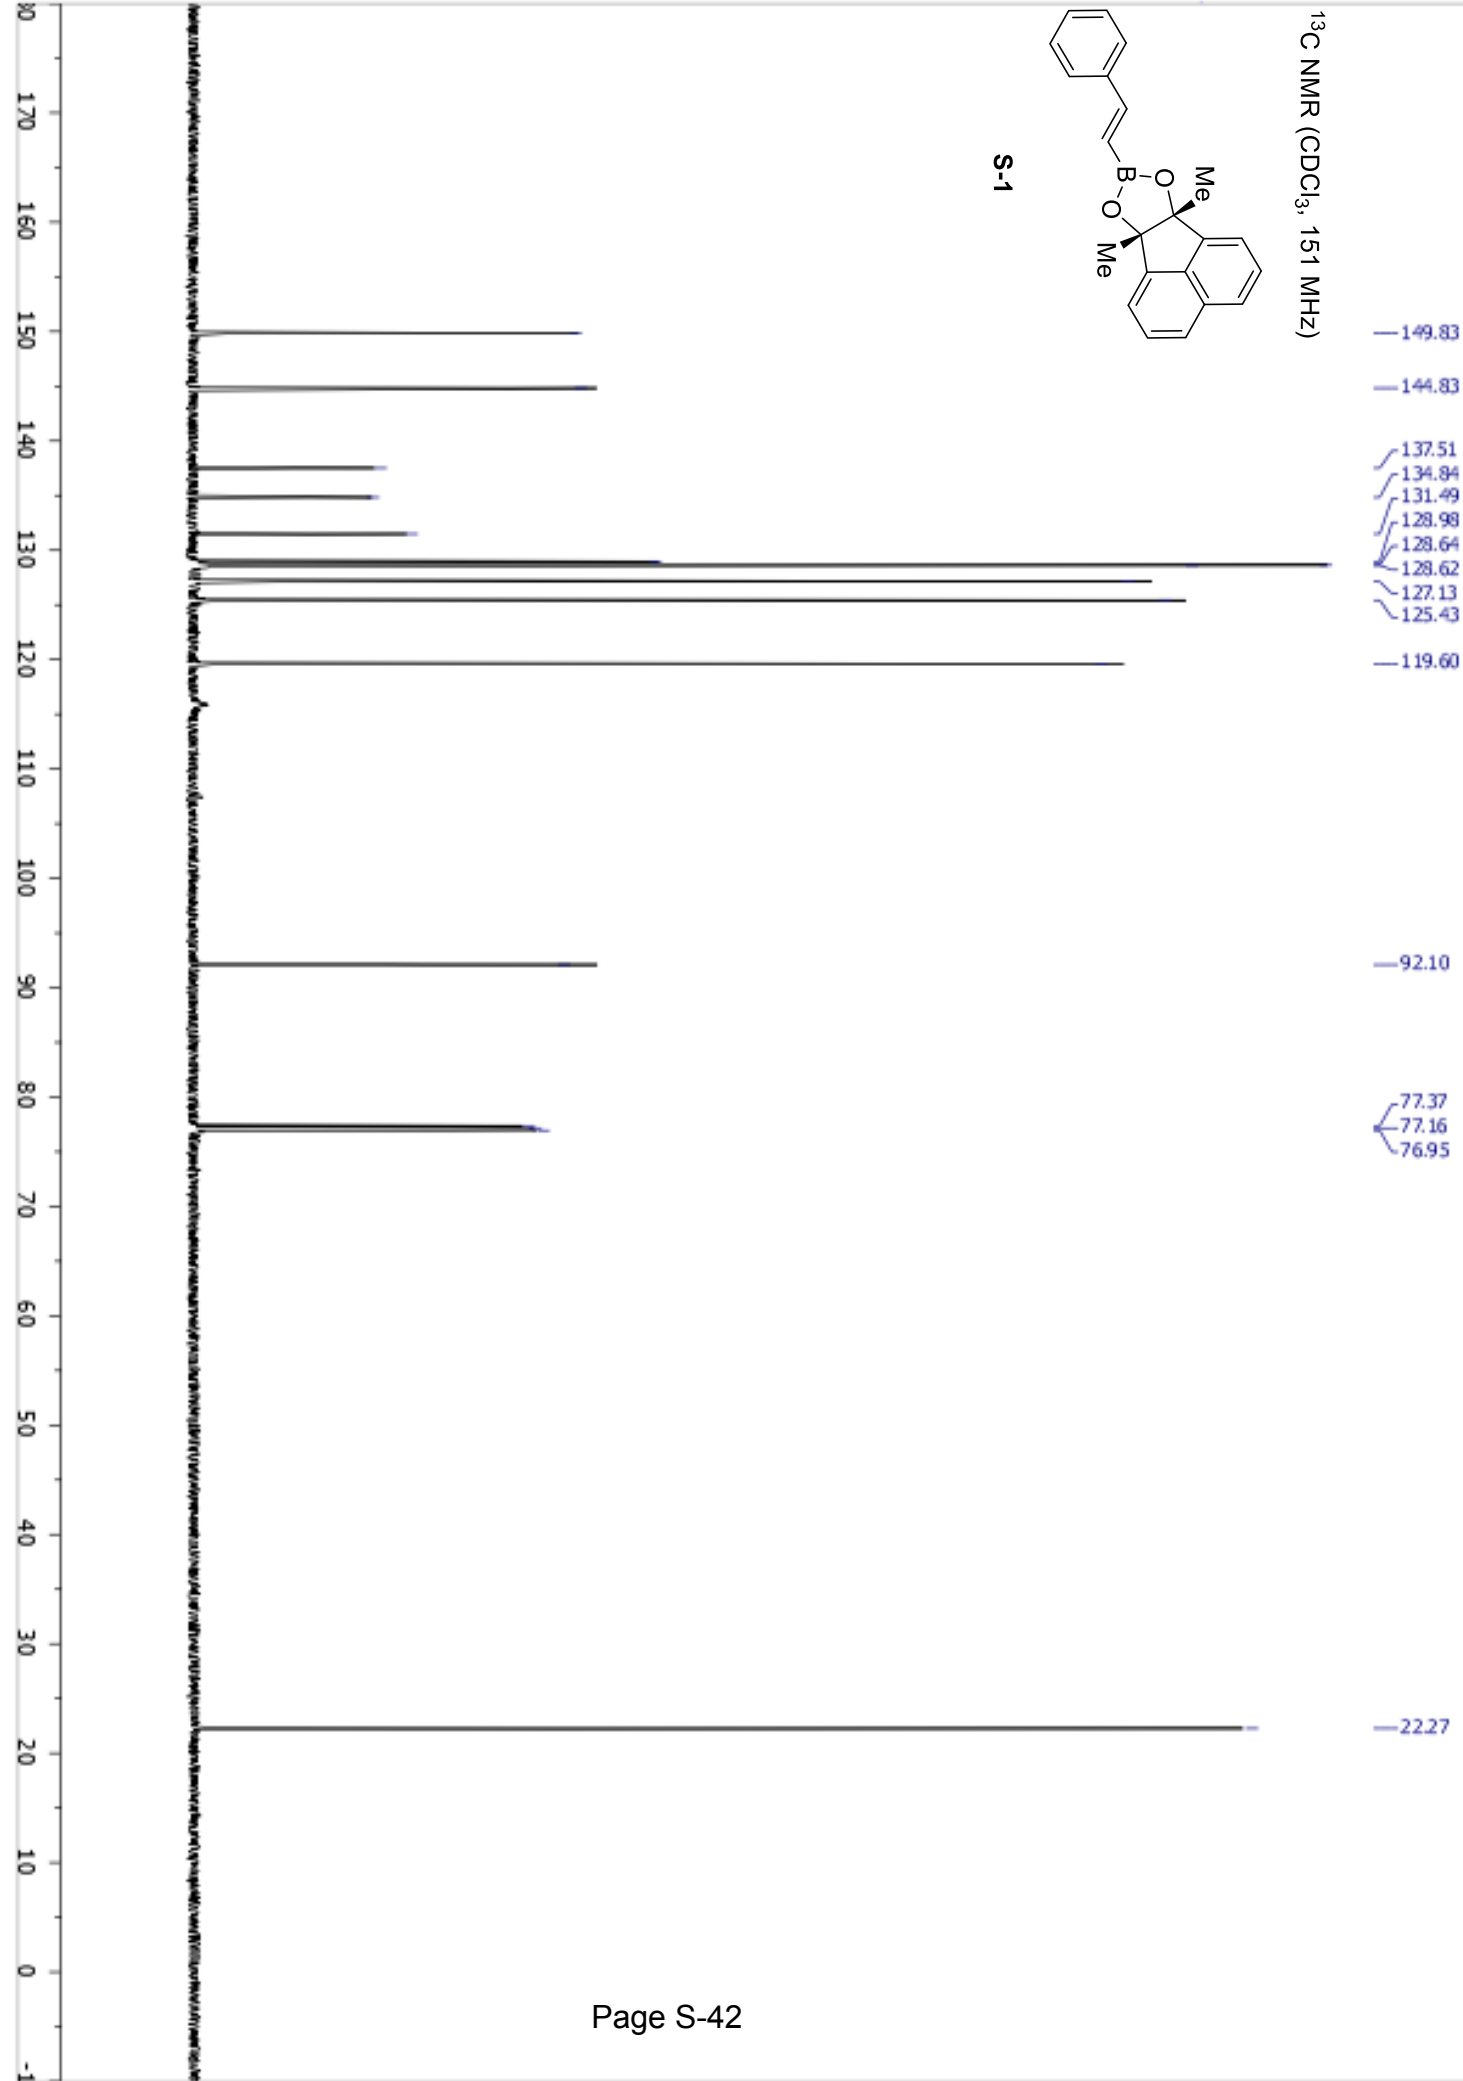

$^1\text{H}$  NMR ( $\text{CDCl}_3$ , 500 MHz)

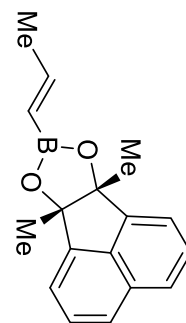

S-2

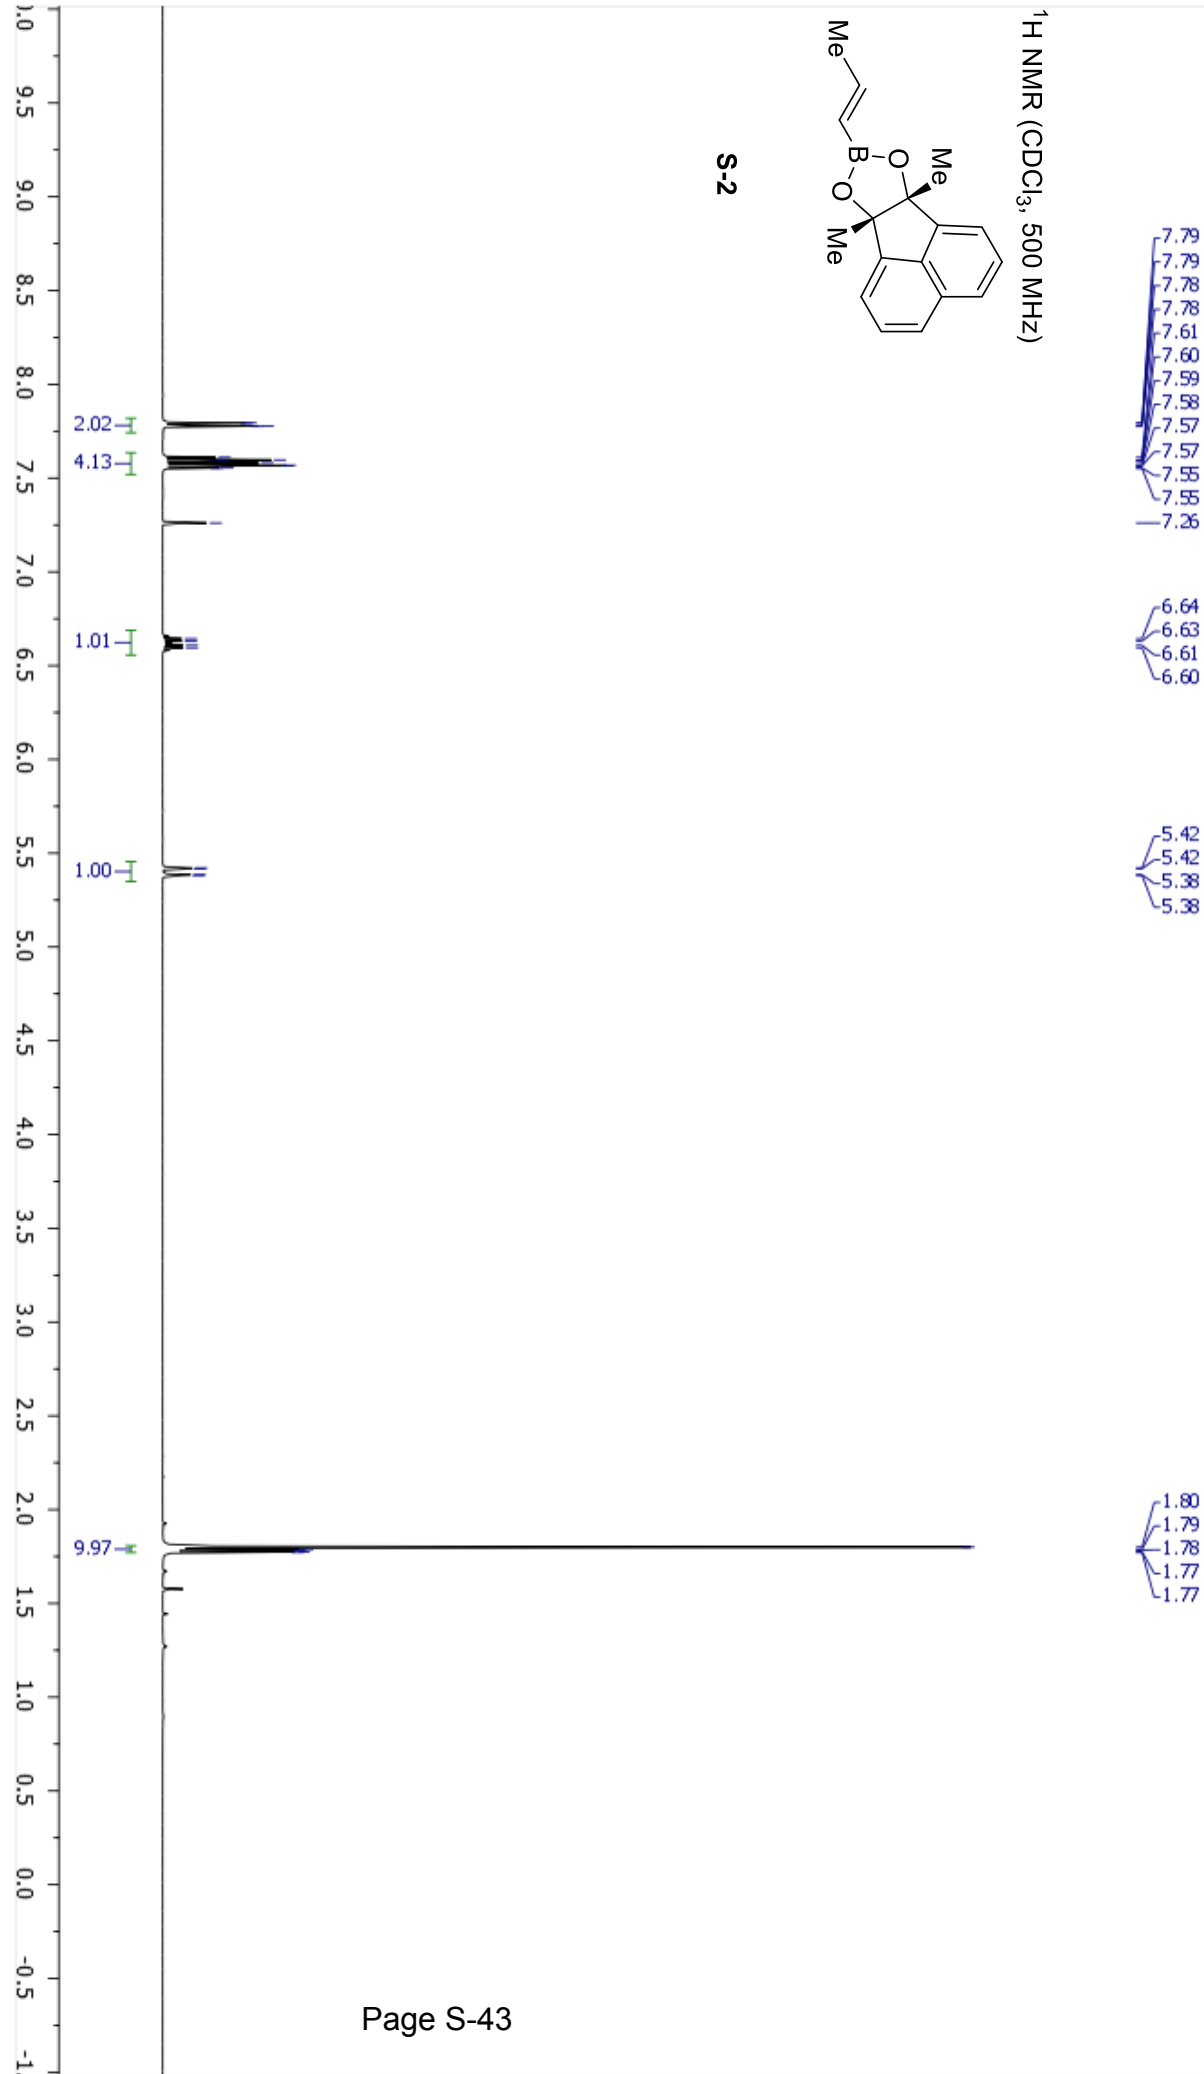

$^{13}\text{C}$  NMR ( $\text{CDCl}_3$ , 126 MHz)

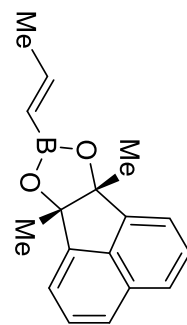

S-2

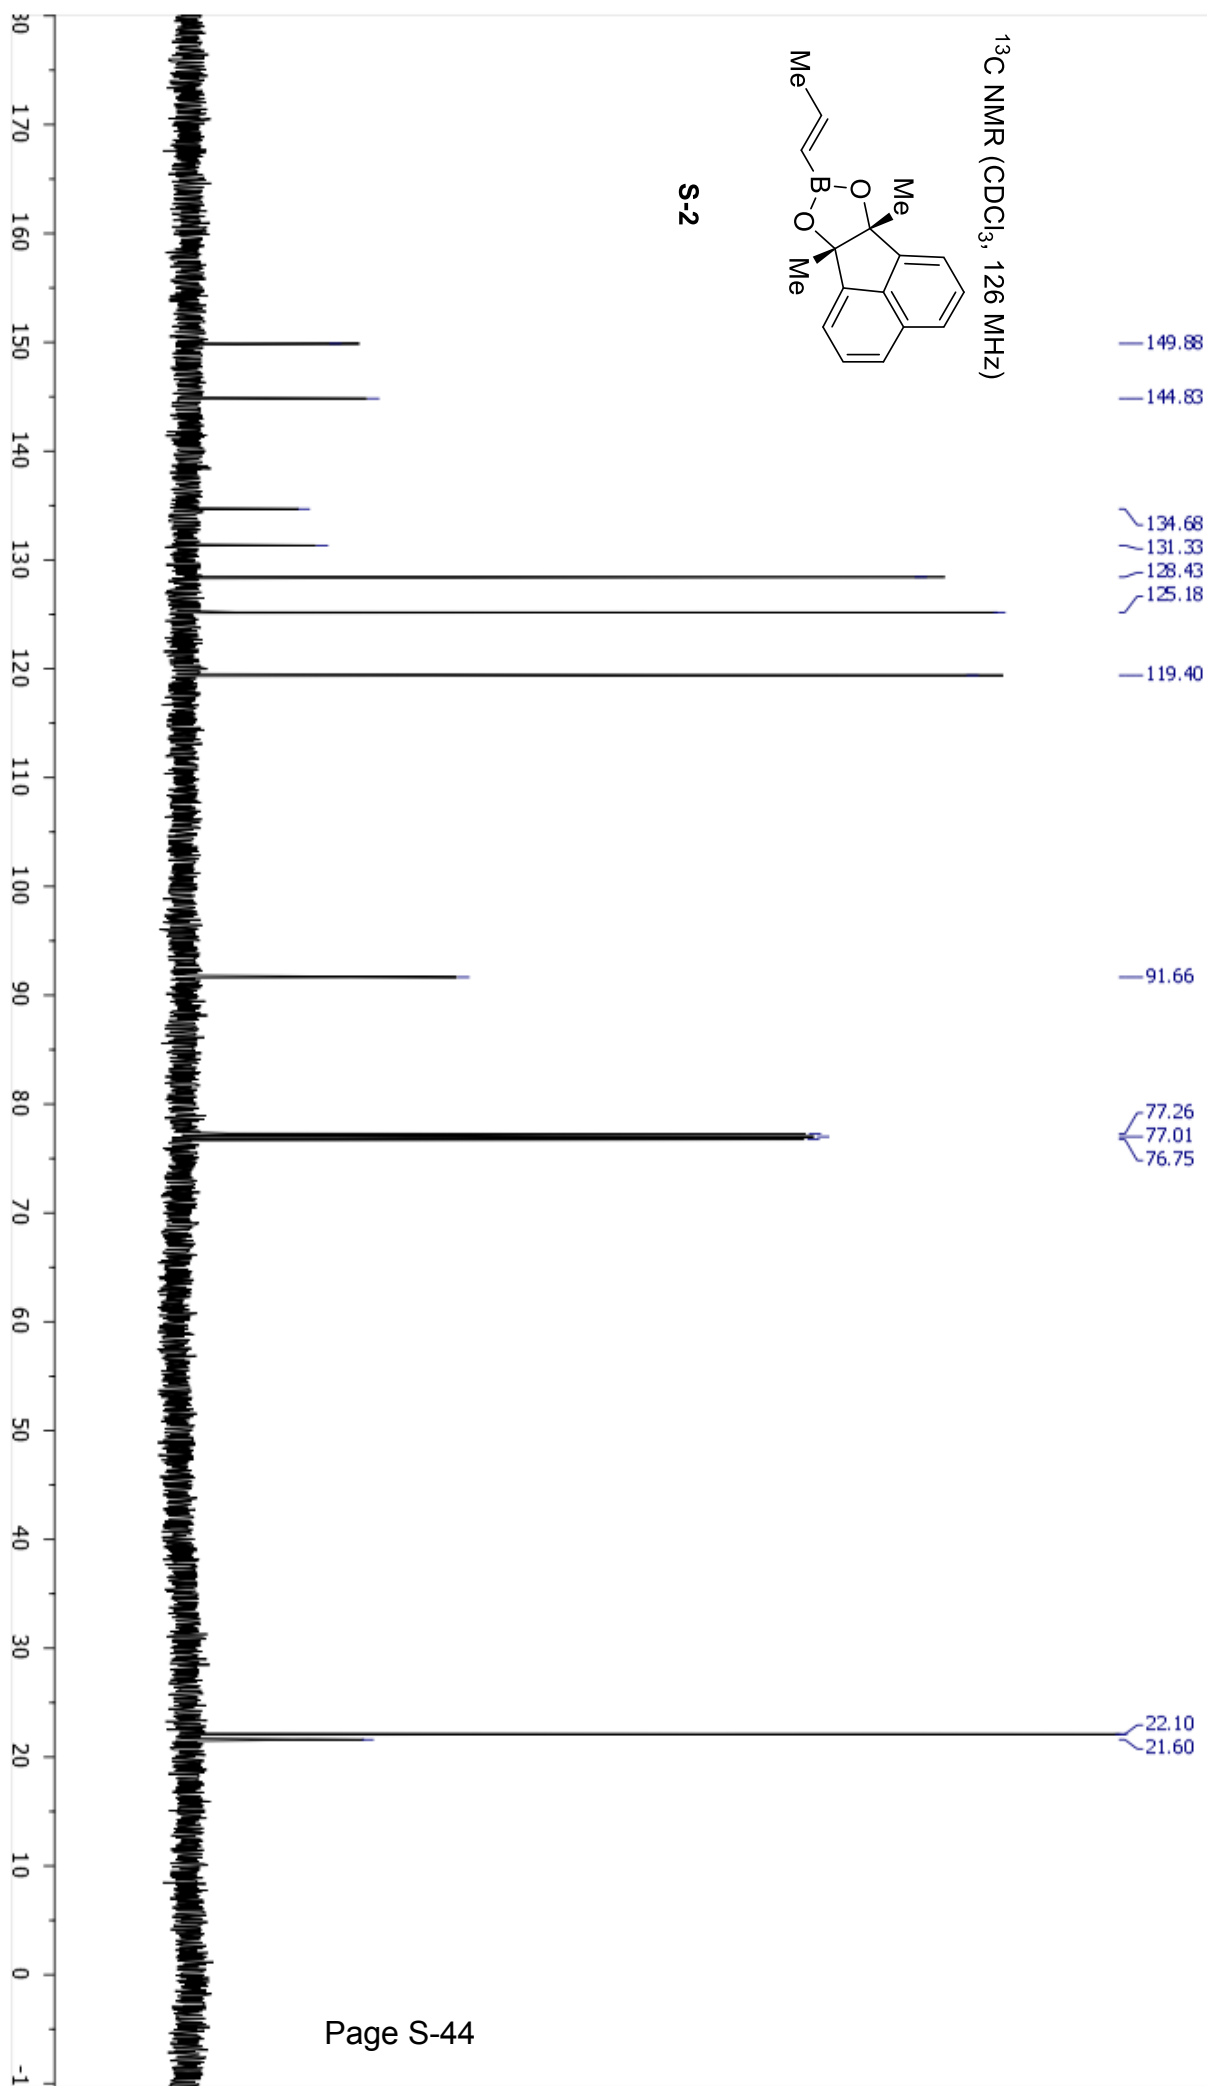



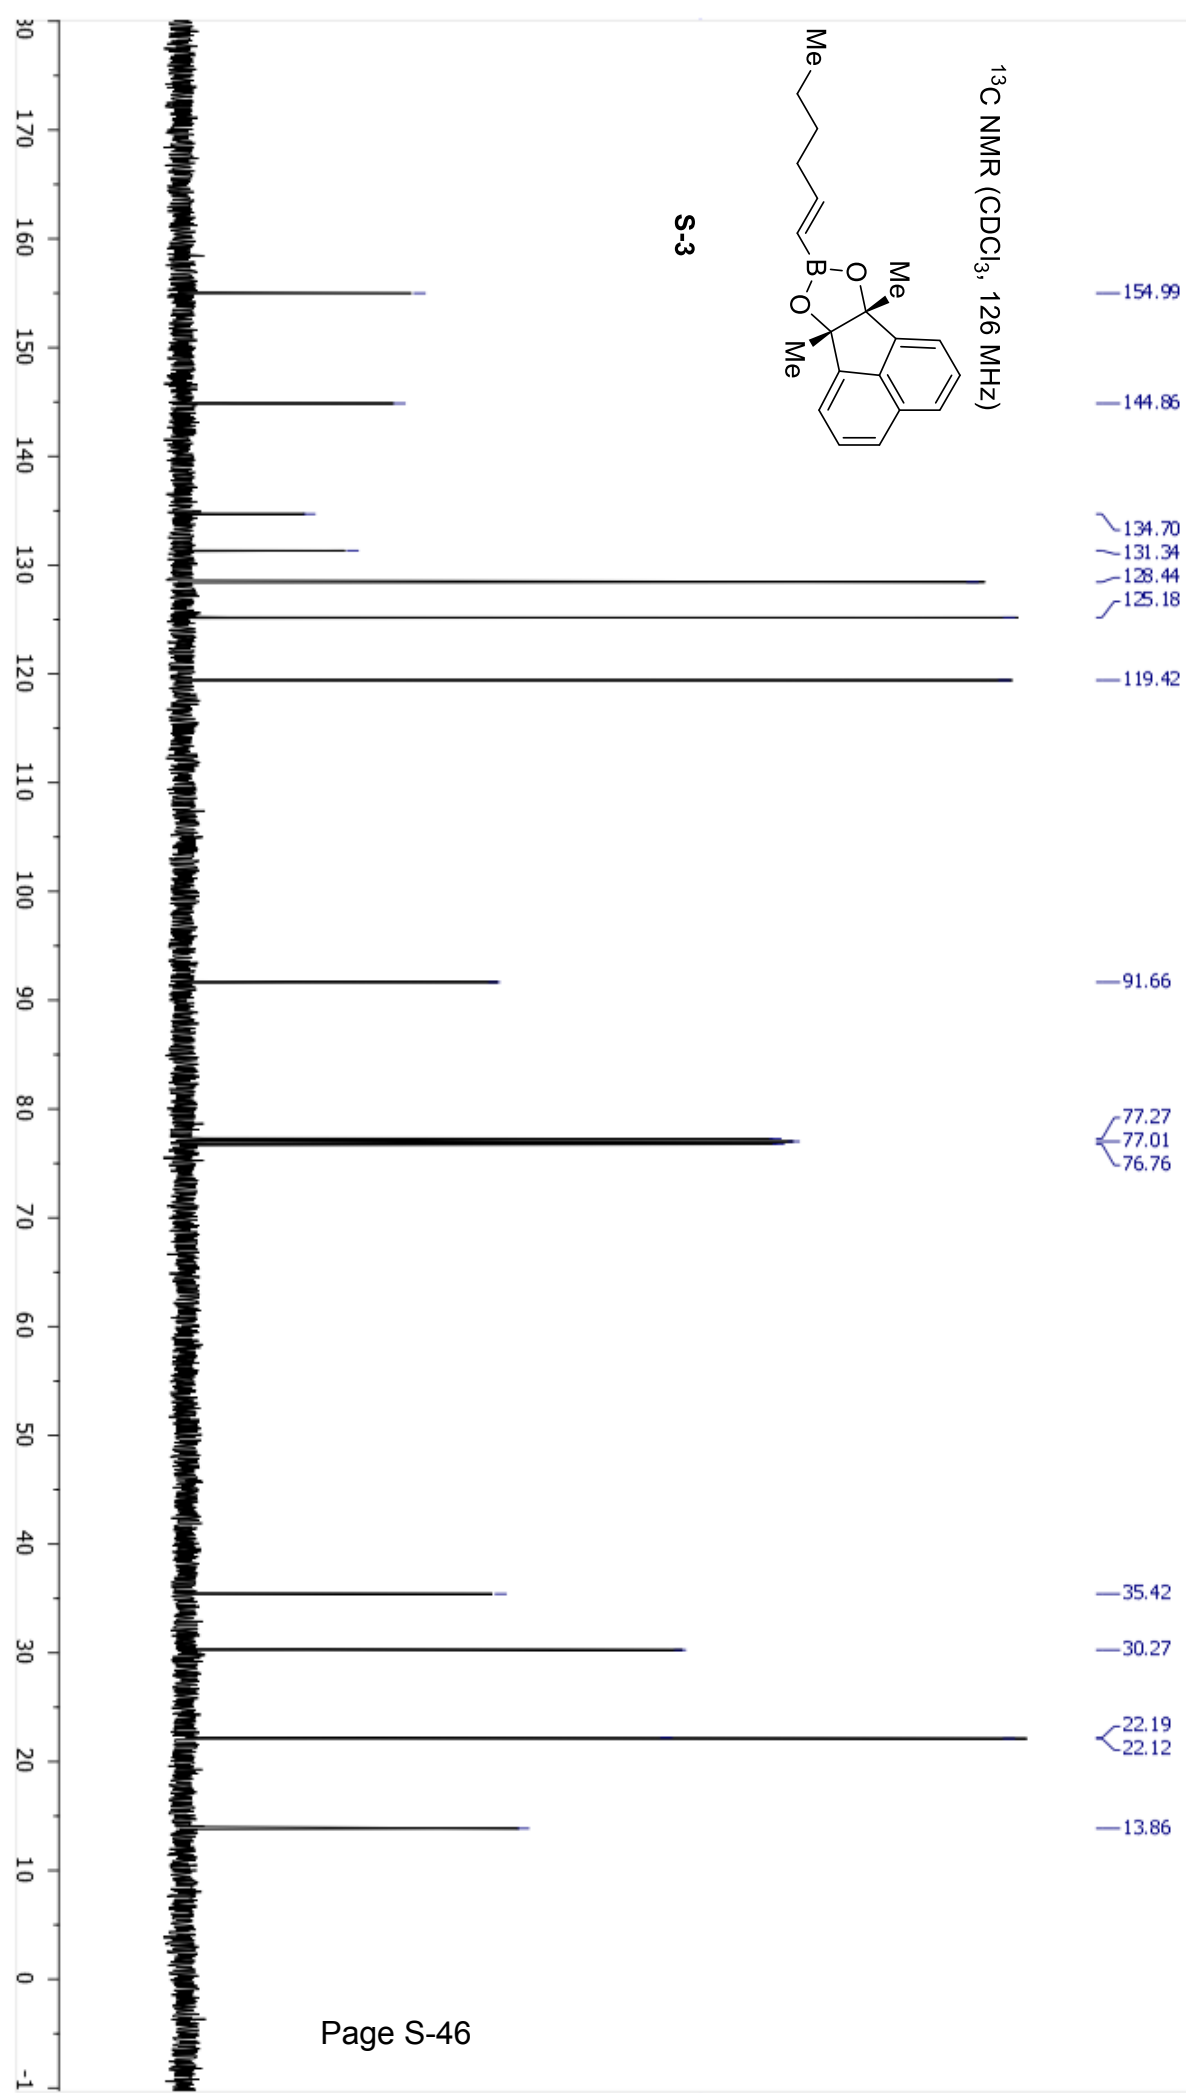

<sup>1</sup>H NMR (CDCl<sub>3</sub>, 500 MHz)

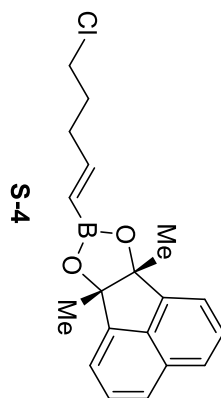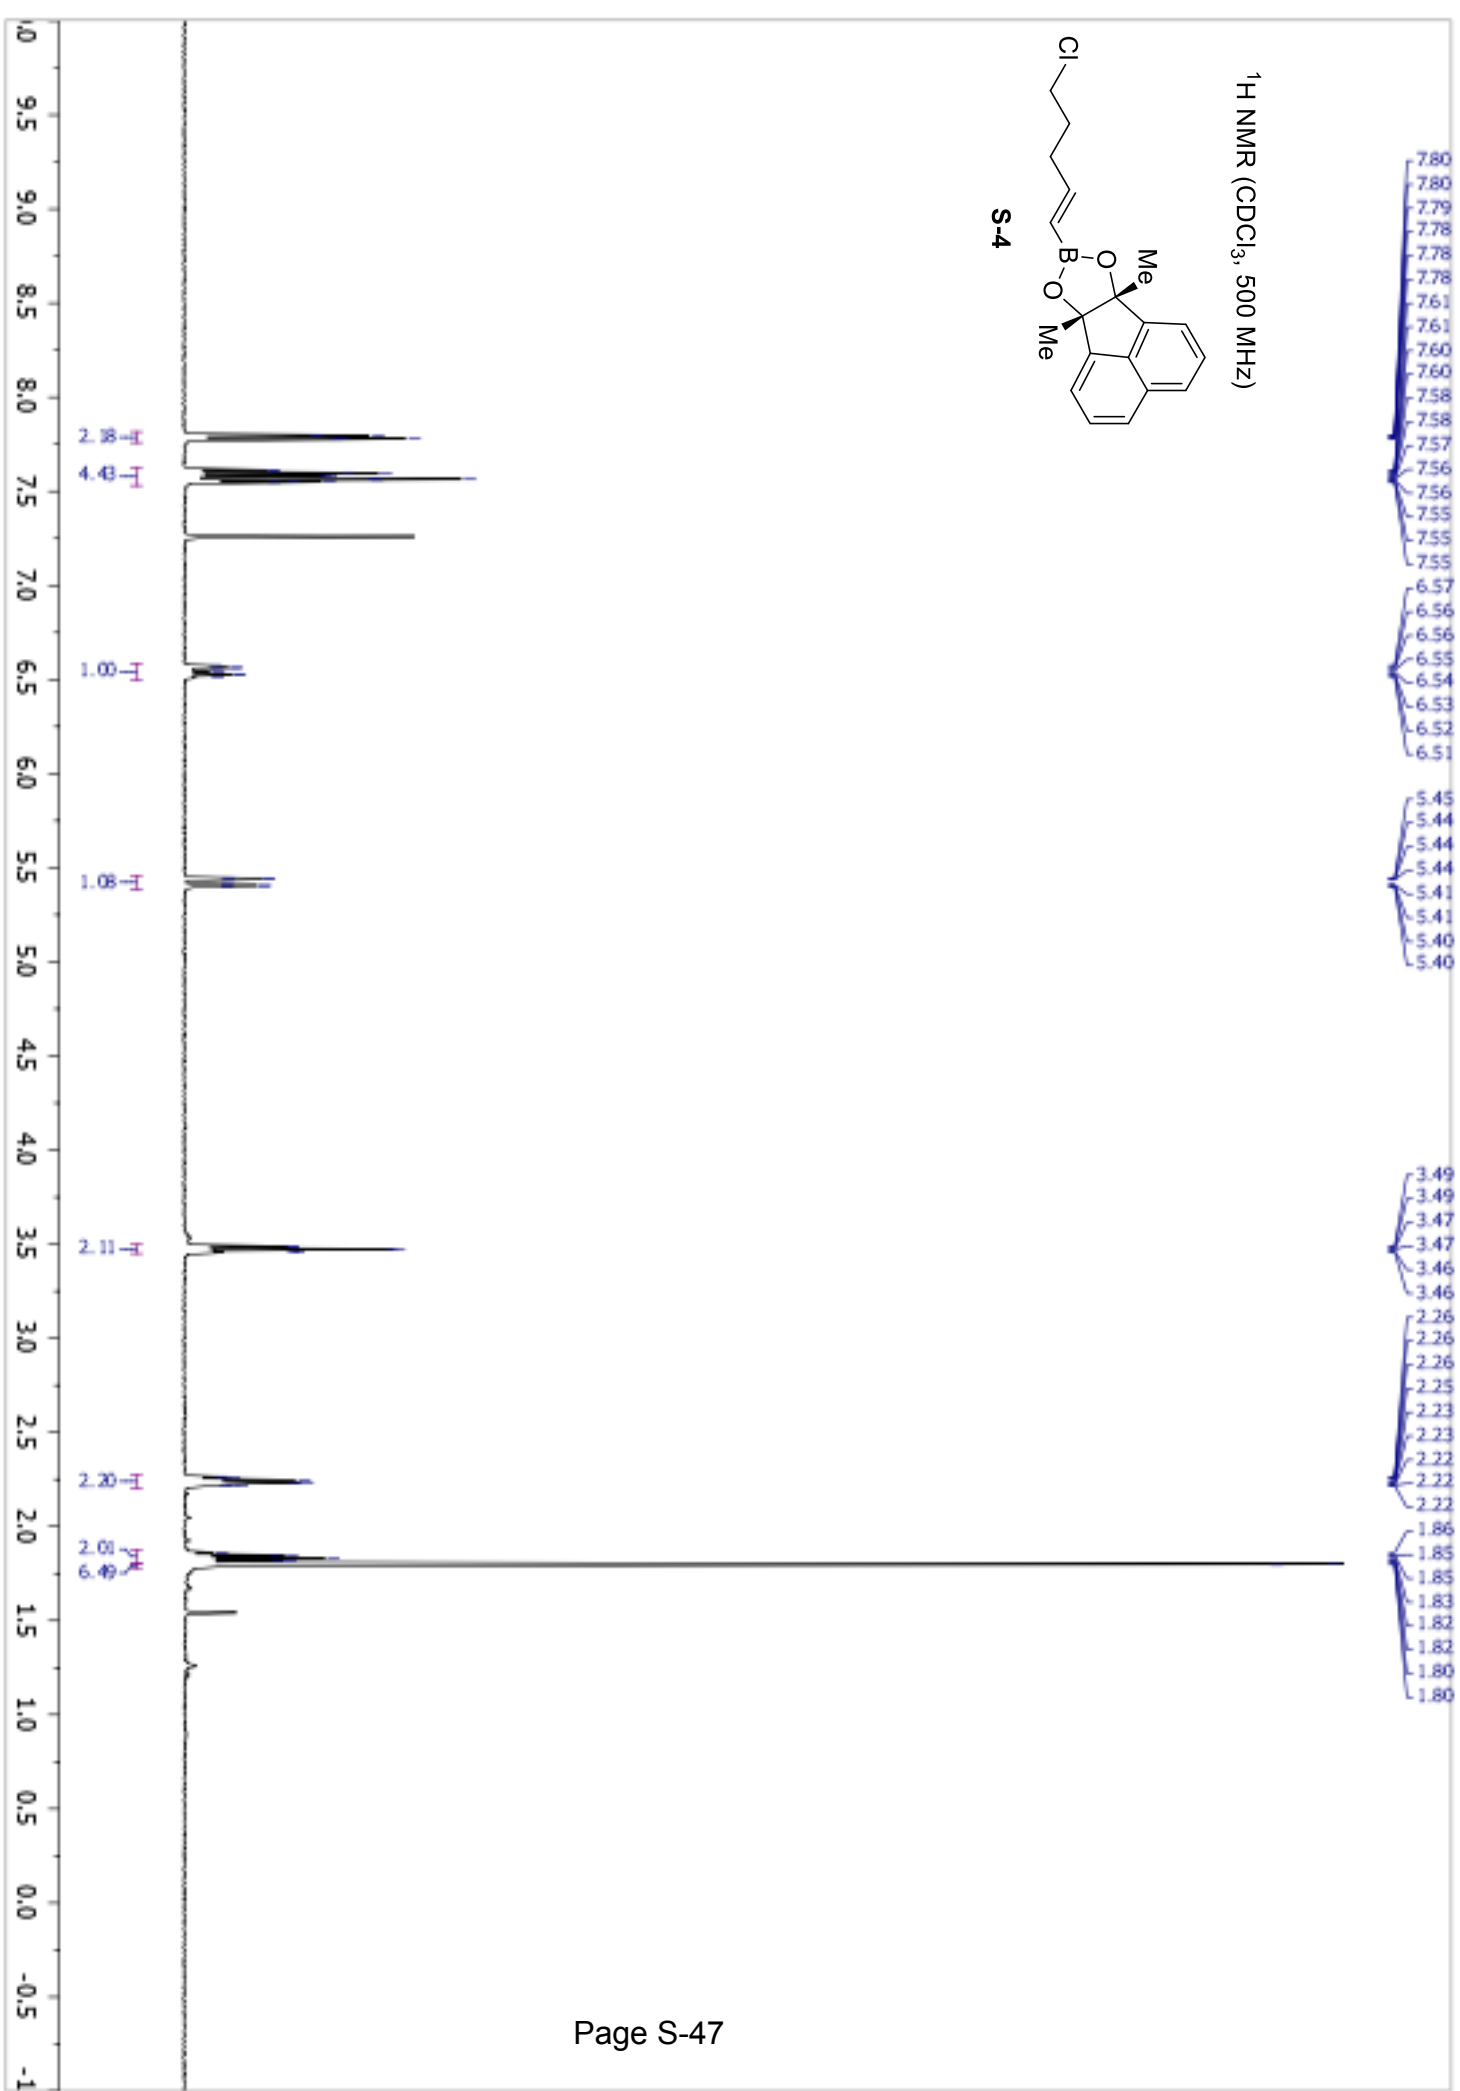

<sup>13</sup>C NMR (CDCl<sub>3</sub>, 151 MHz)

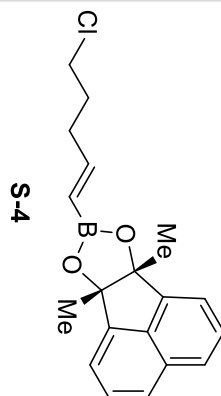

152.46  
144.86  
134.81  
131.47  
128.60  
125.39  
119.58  
91.93  
77.37  
77.16  
76.95  
44.40  
32.76  
31.03  
22.24

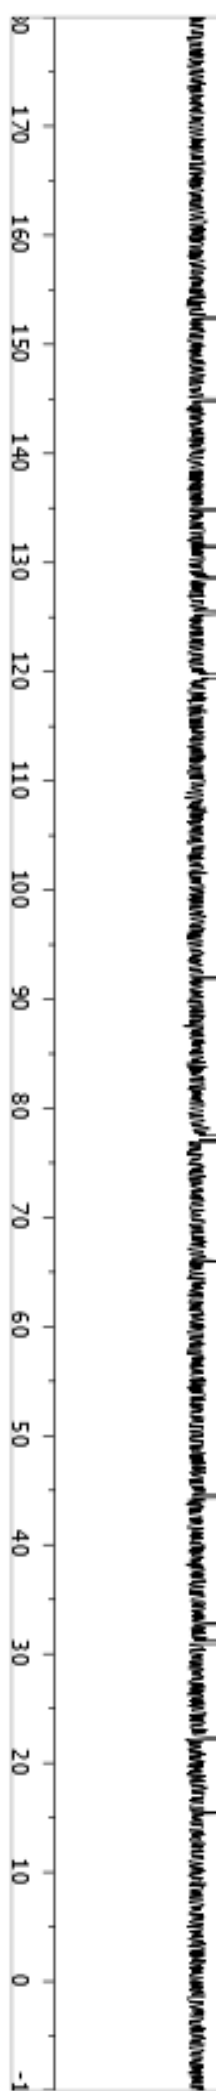



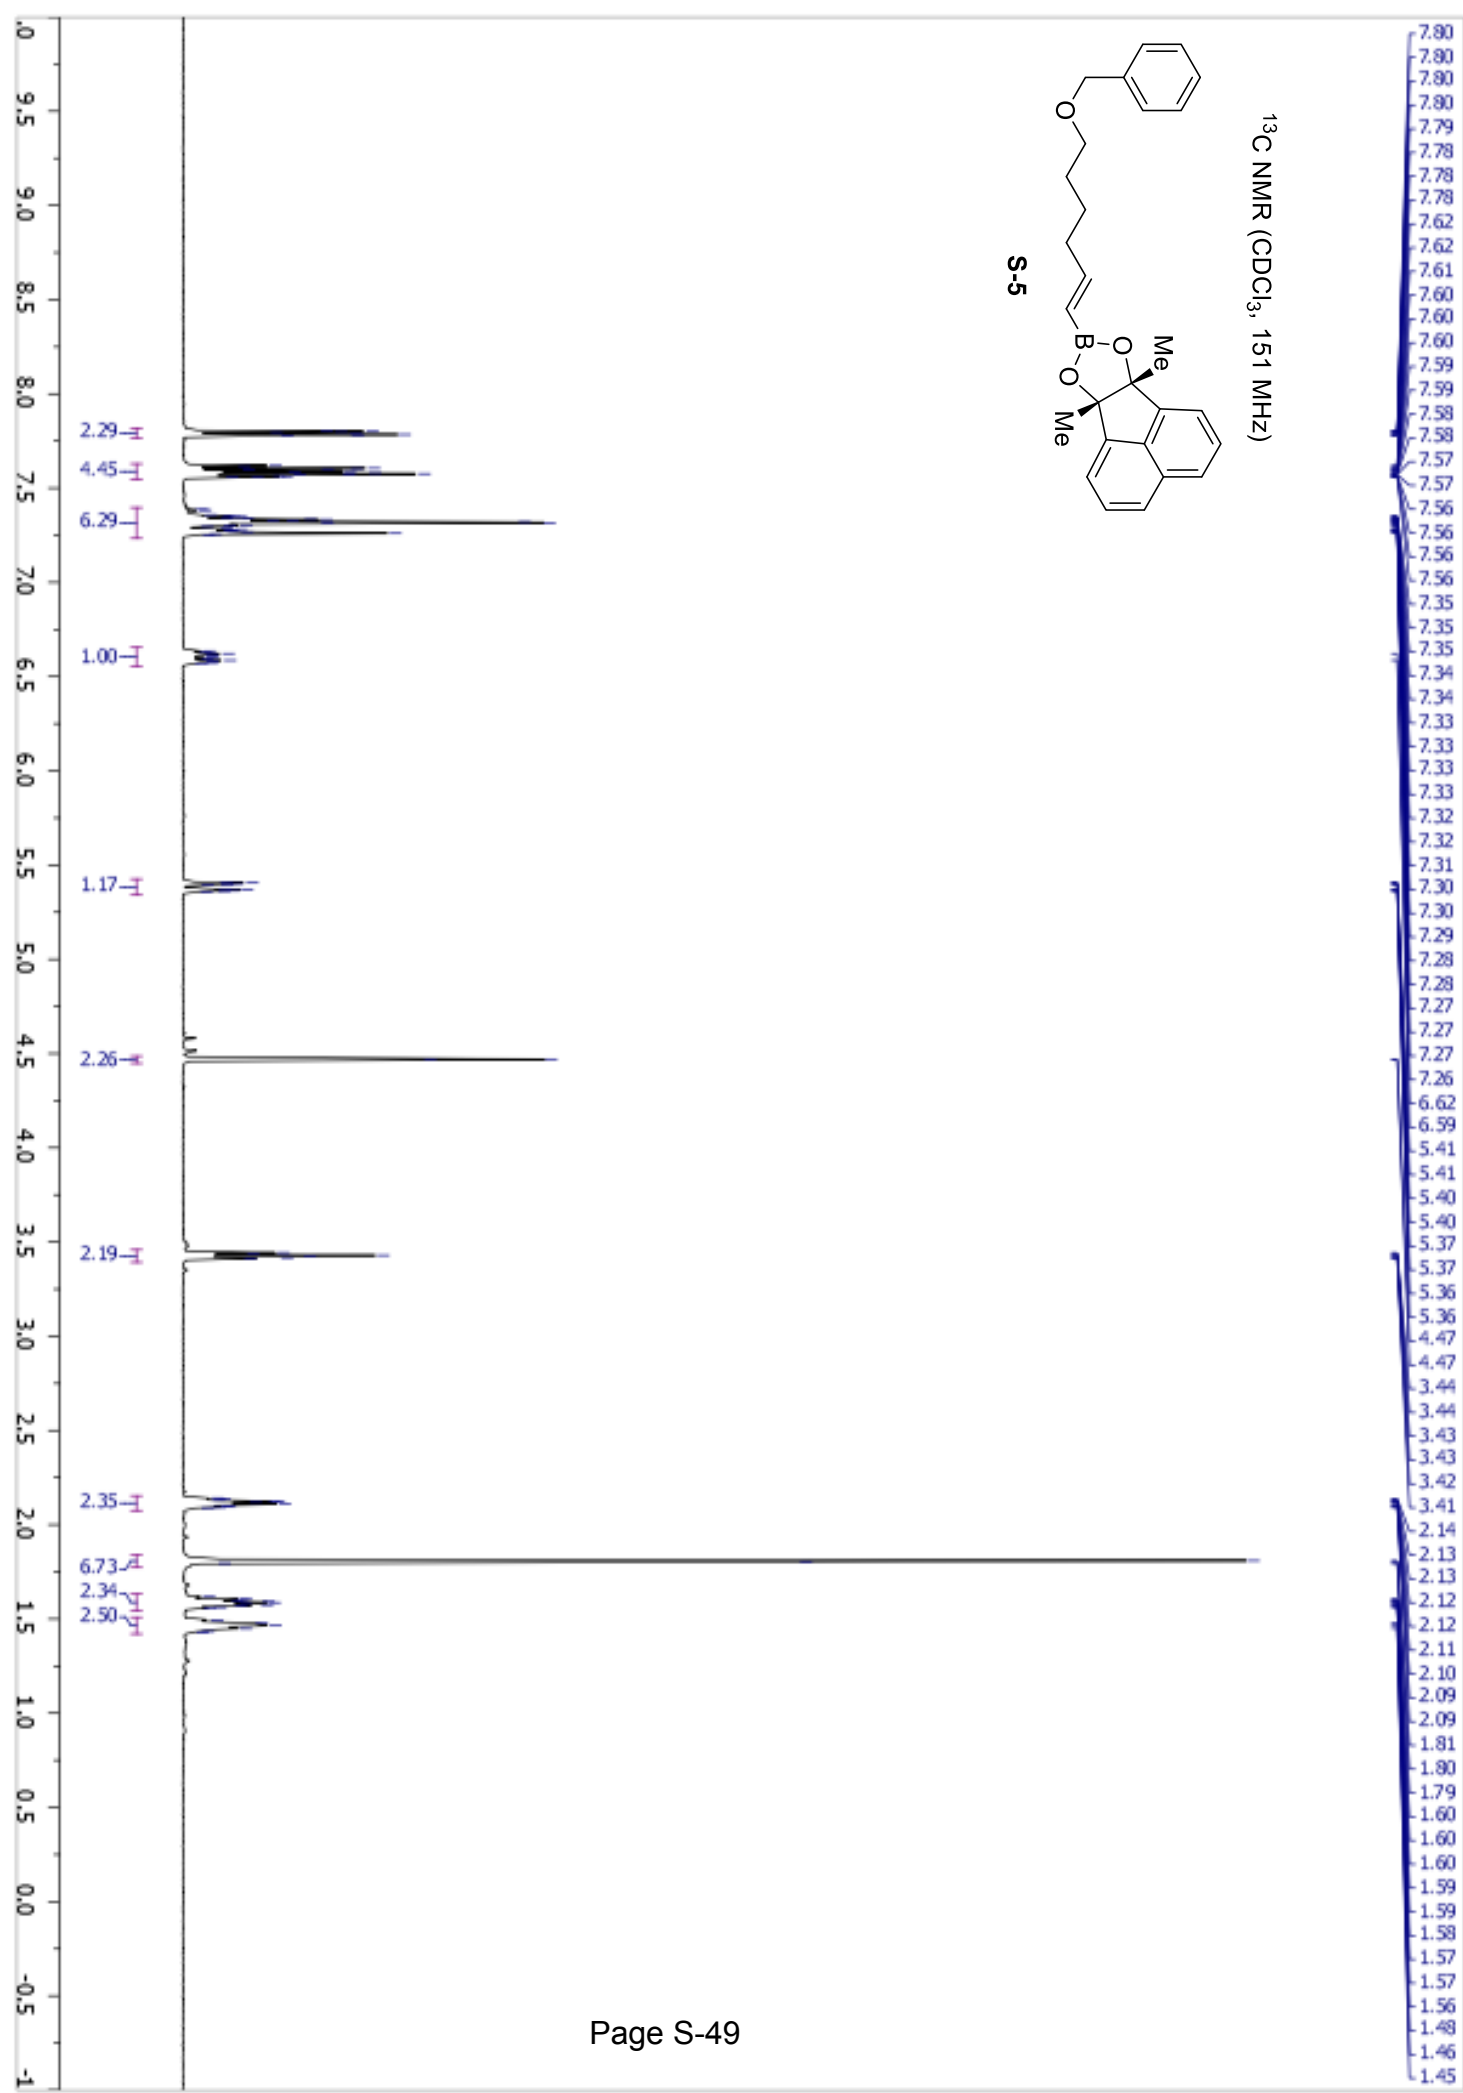

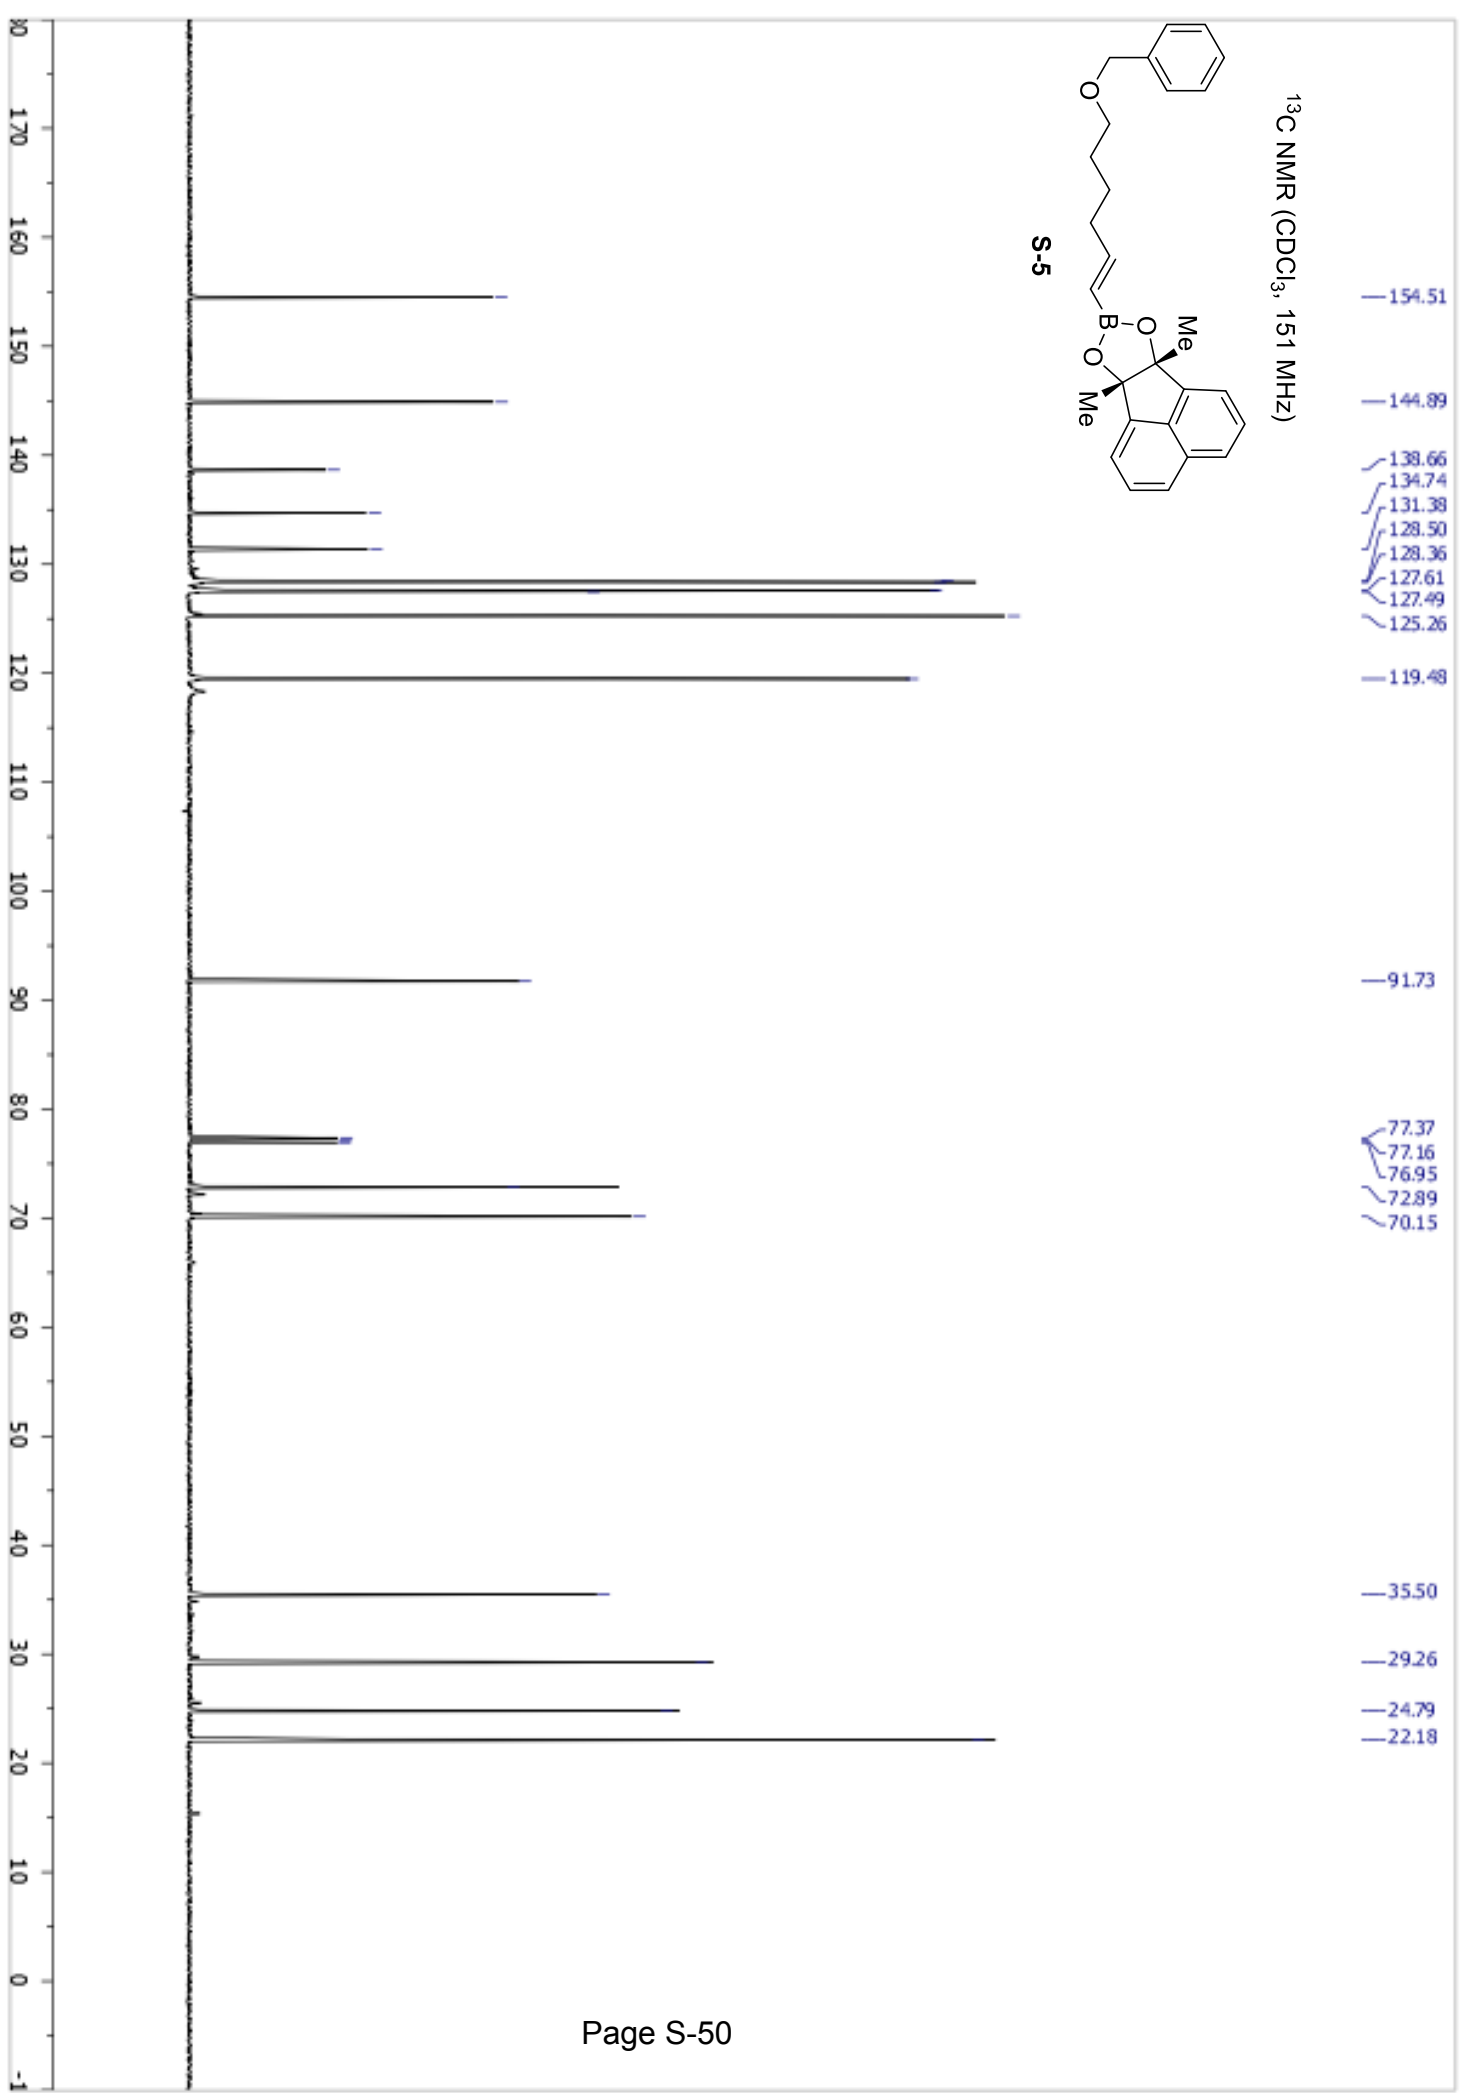

7.81  
7.80  
7.79  
7.79  
7.63  
7.62  
7.61  
7.60  
7.60  
7.59  
7.38  
7.38  
7.37  
7.37  
7.34  
7.30  
7.26  
7.26  
6.84  
6.83  
6.83  
6.82

5.97  
5.93

3.79  
3.79

1.85

<sup>1</sup>H NMR (CDCl<sub>3</sub>, 500 MHz)

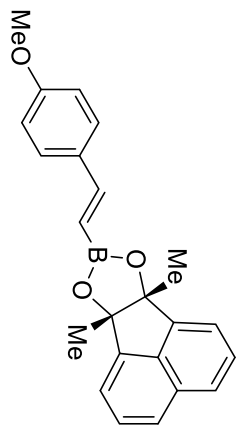

S-6

9.5  
9.0  
8.5  
8.0  
7.5  
7.0  
6.5  
6.0  
5.5  
5.0  
4.5  
4.0  
3.5  
3.0  
2.5  
2.0  
1.5  
1.0  
0.5  
0.0  
-0.5  
-1

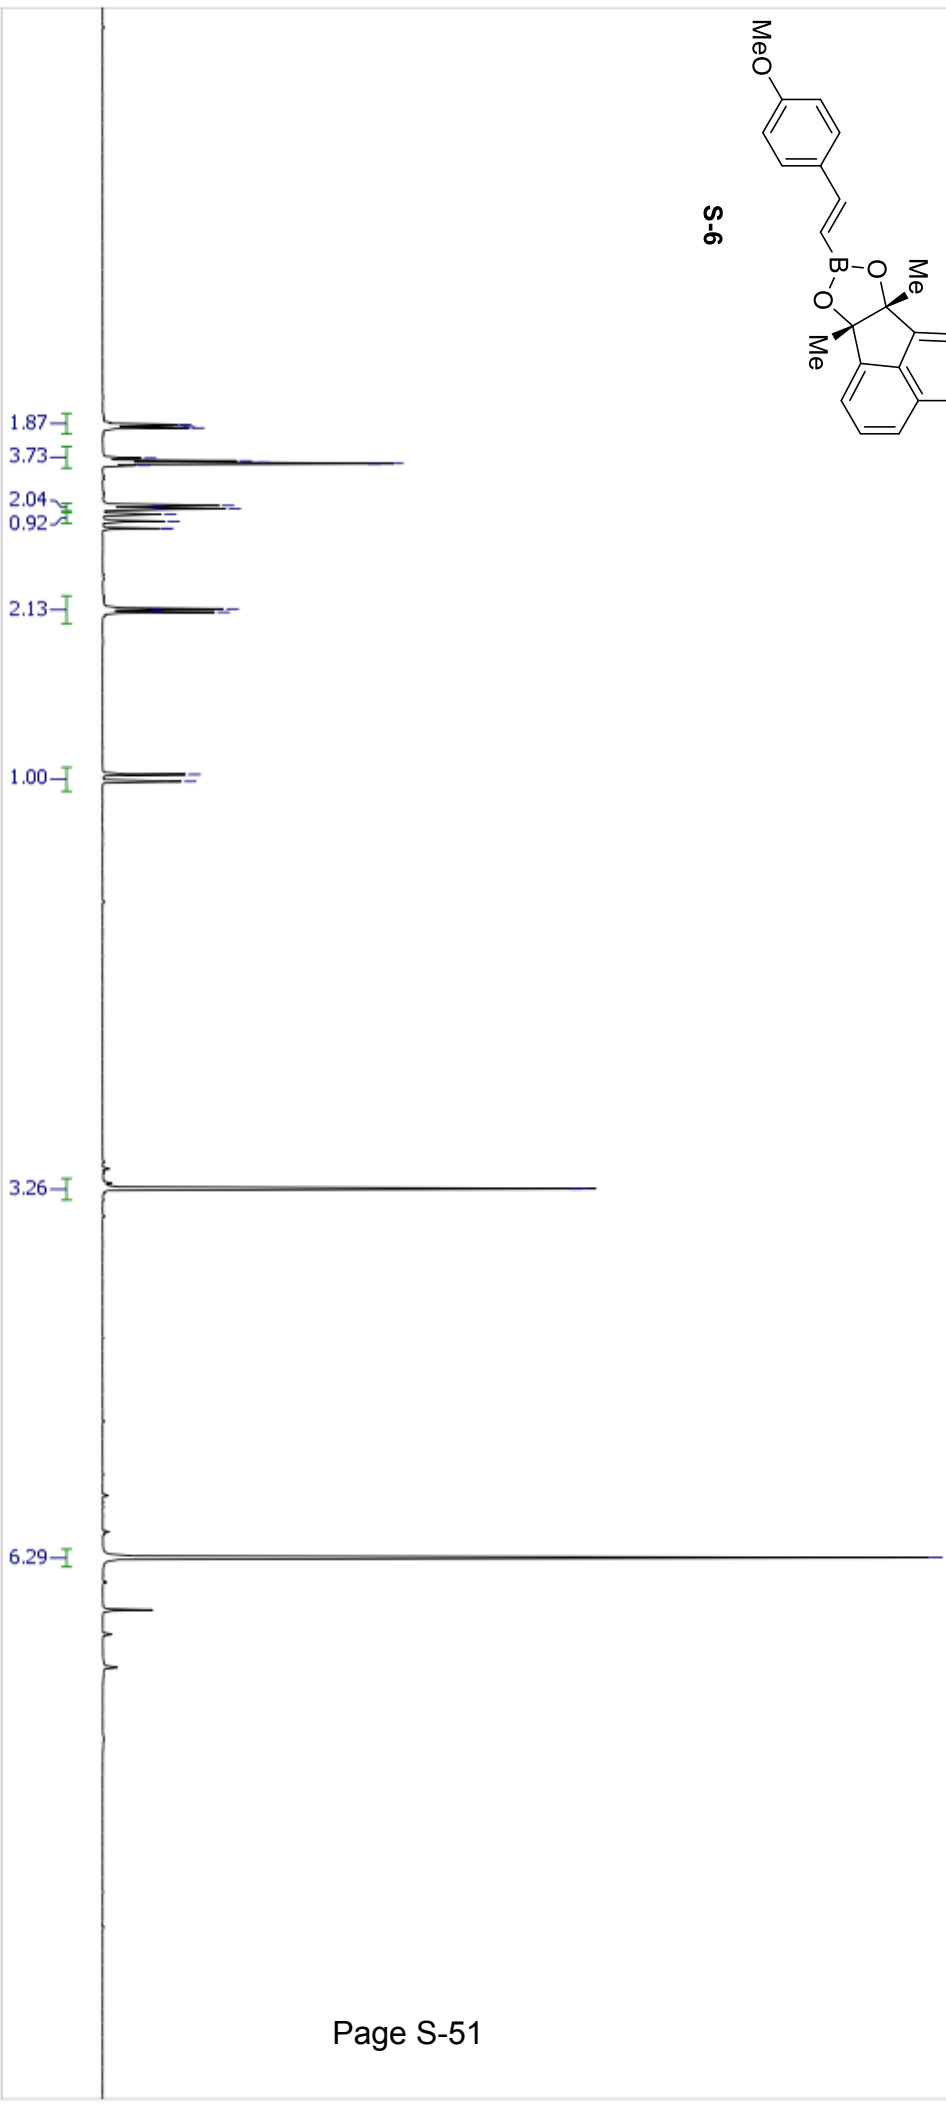

<sup>13</sup>C NMR (CDCl<sub>3</sub>, 126 MHz)

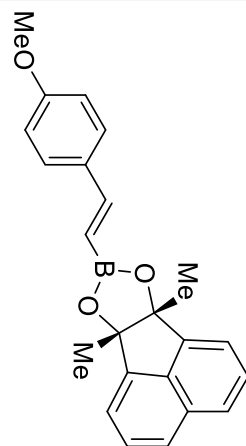

S-6

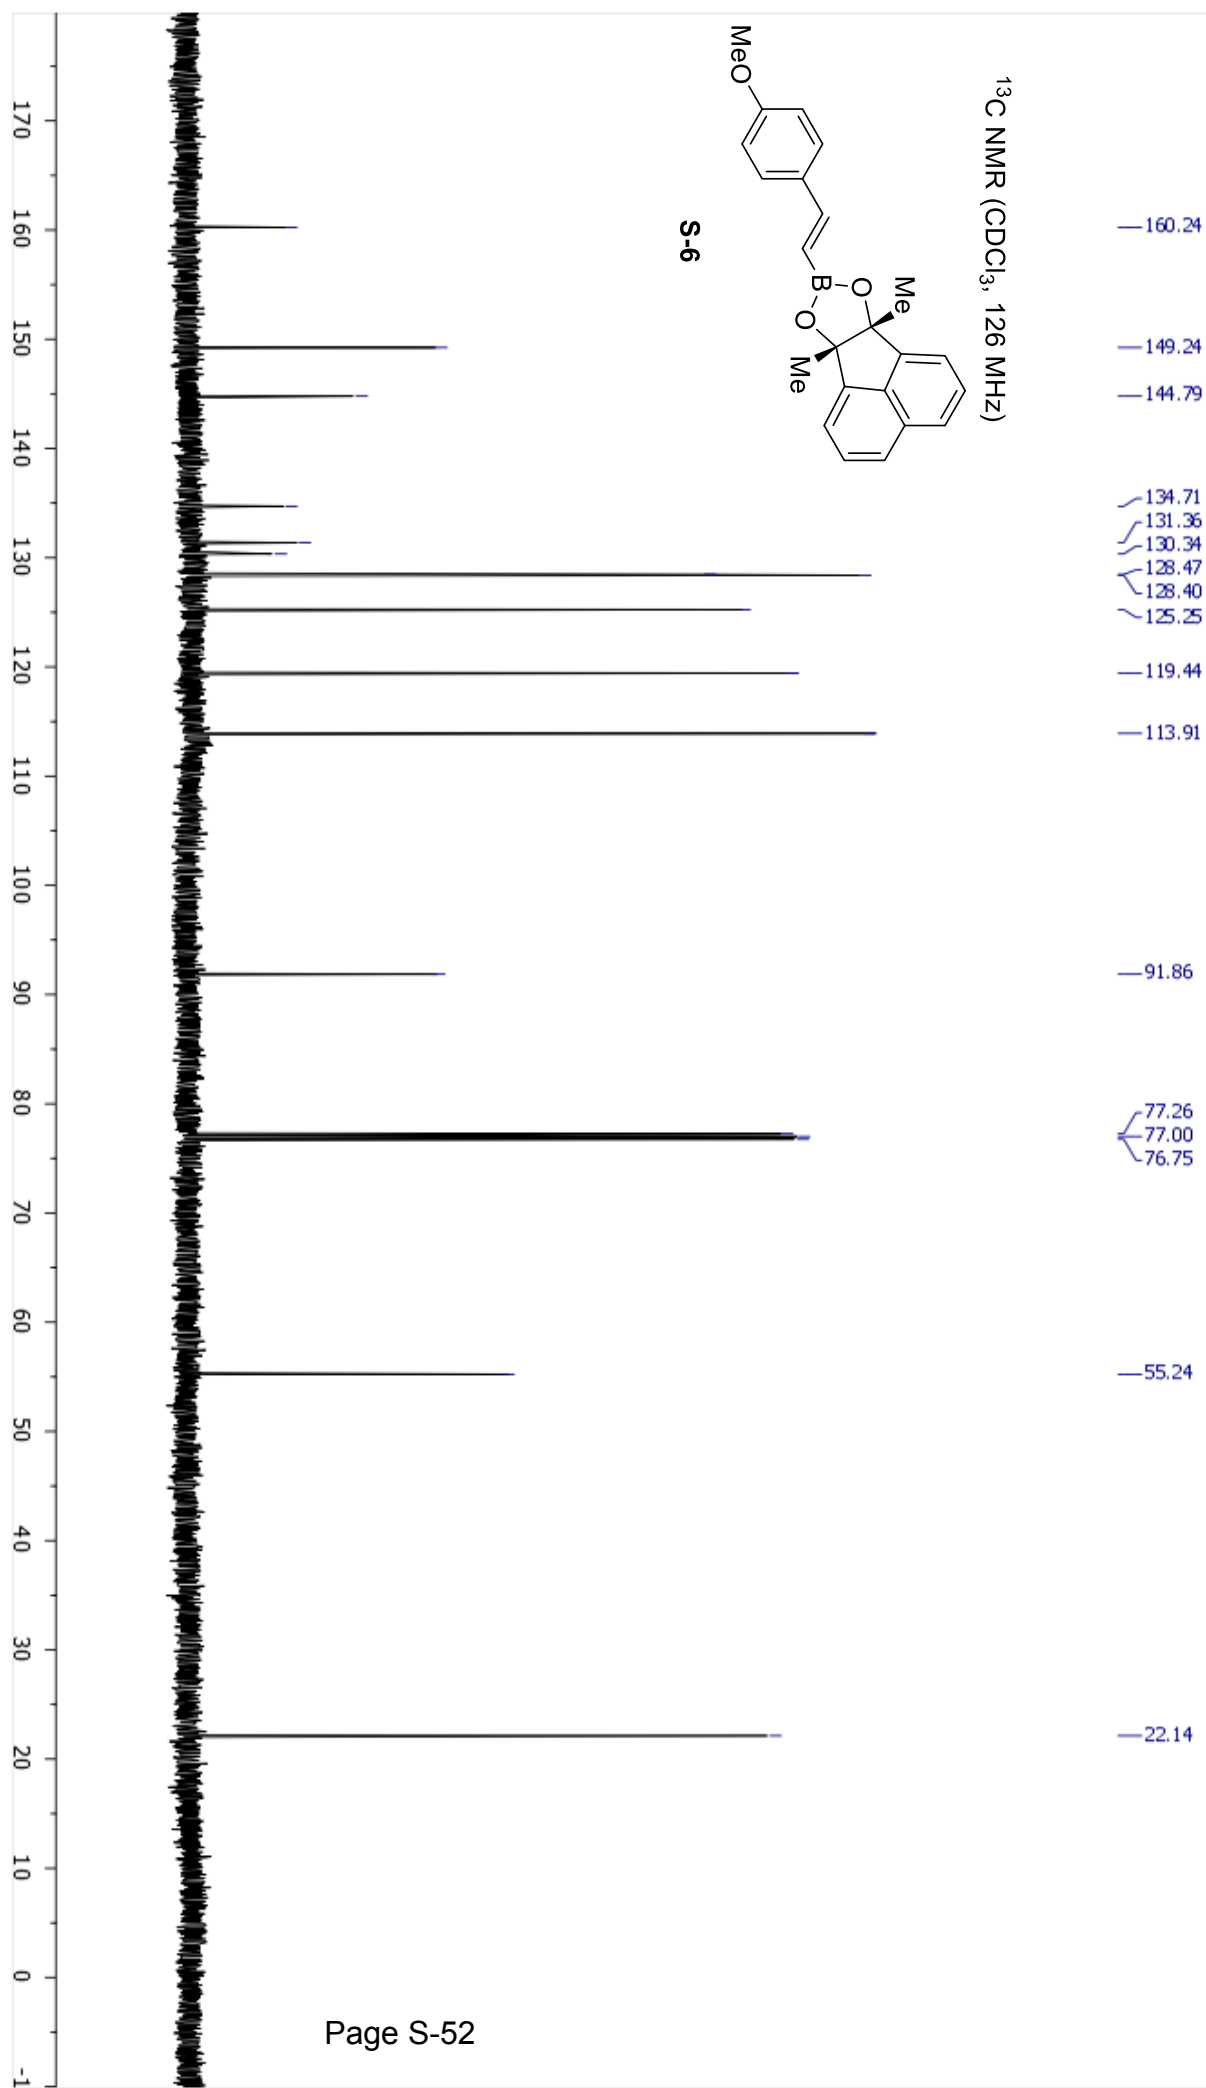

7.83  
7.82  
7.82  
7.81  
7.81  
7.66  
7.64  
7.63  
7.63  
7.62  
7.60  
7.57  
7.55  
7.51  
7.50  
7.39  
7.35  
7.26  
7.26  
6.22  
6.22  
6.18  
6.18

1.87  
1.86

<sup>1</sup>H NMR (CDCl<sub>3</sub>, 500 MHz)

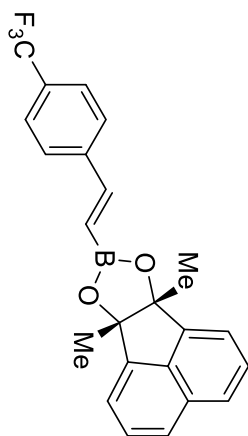

S-7

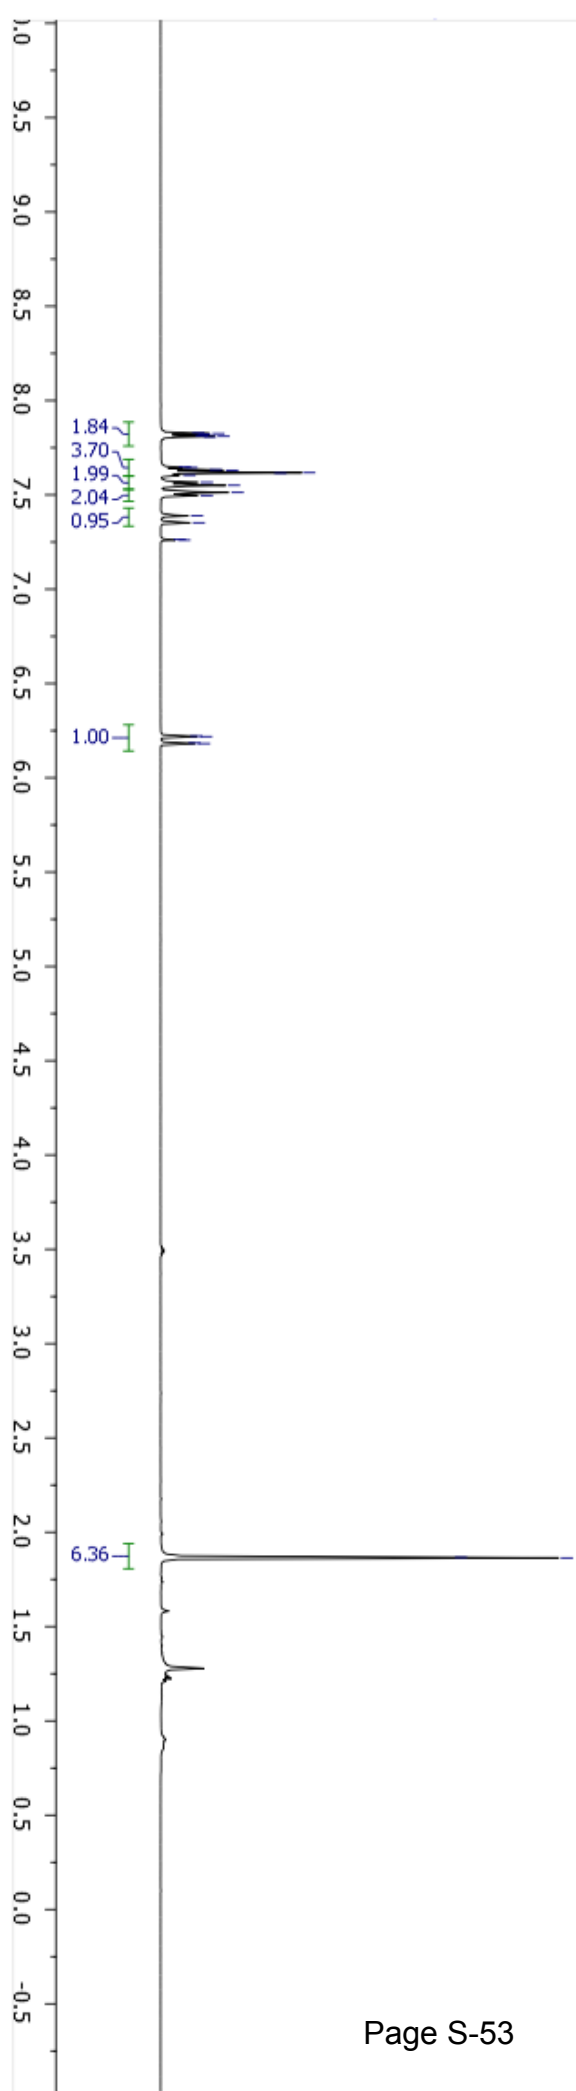

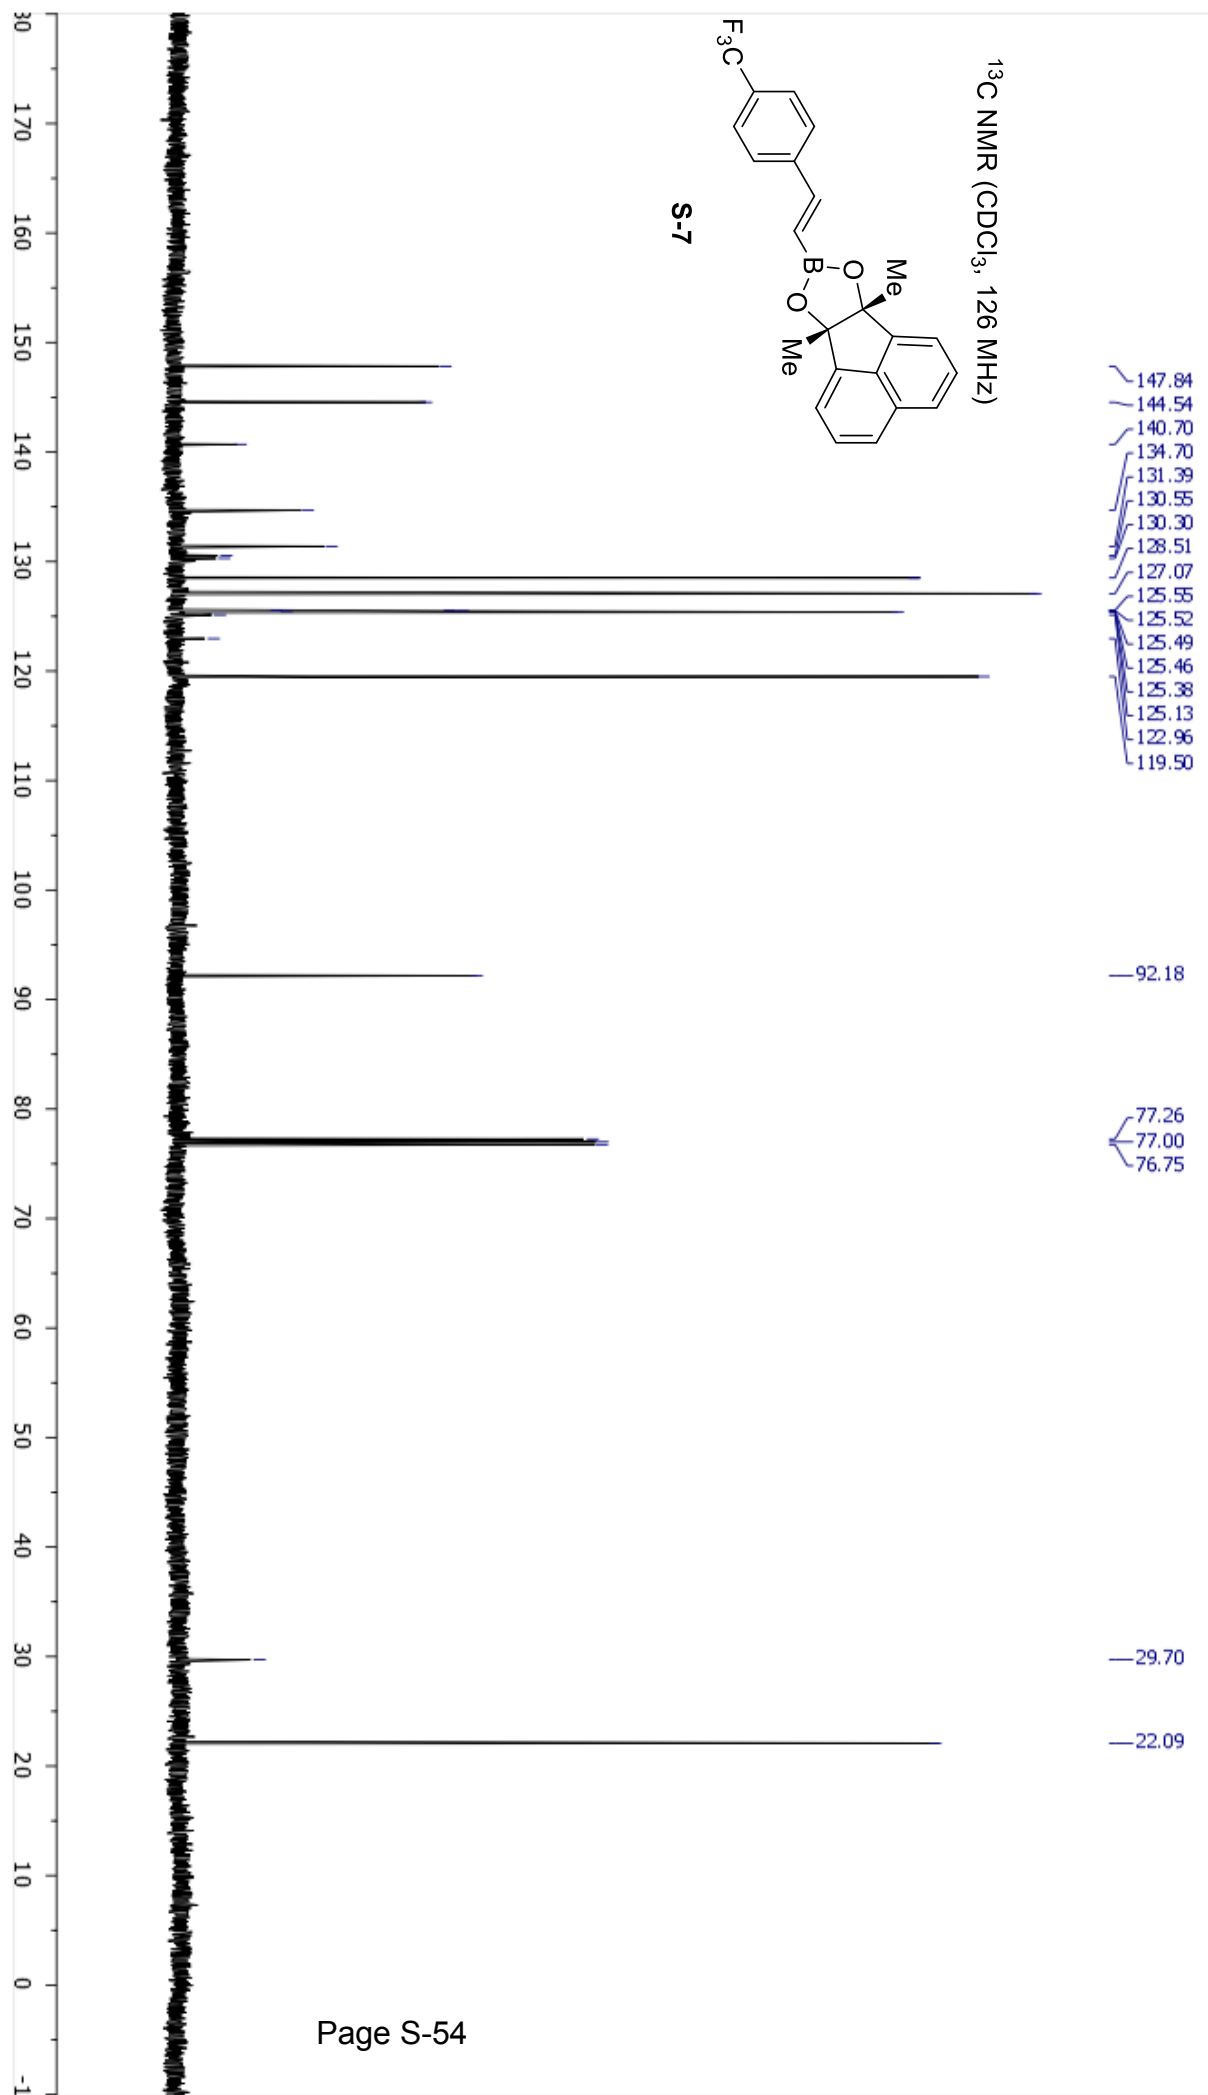

7.82  
7.81  
7.80  
7.80  
7.64  
7.62  
7.61  
7.61  
7.60  
7.41  
7.40  
7.39  
7.38  
7.34  
7.30  
7.26  
7.00  
6.98  
6.97

6.03  
5.99

1.85

<sup>1</sup>H NMR (CDCl<sub>3</sub>, 500 MHz)

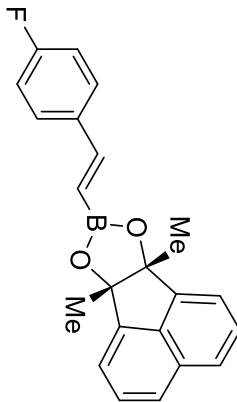

S-8

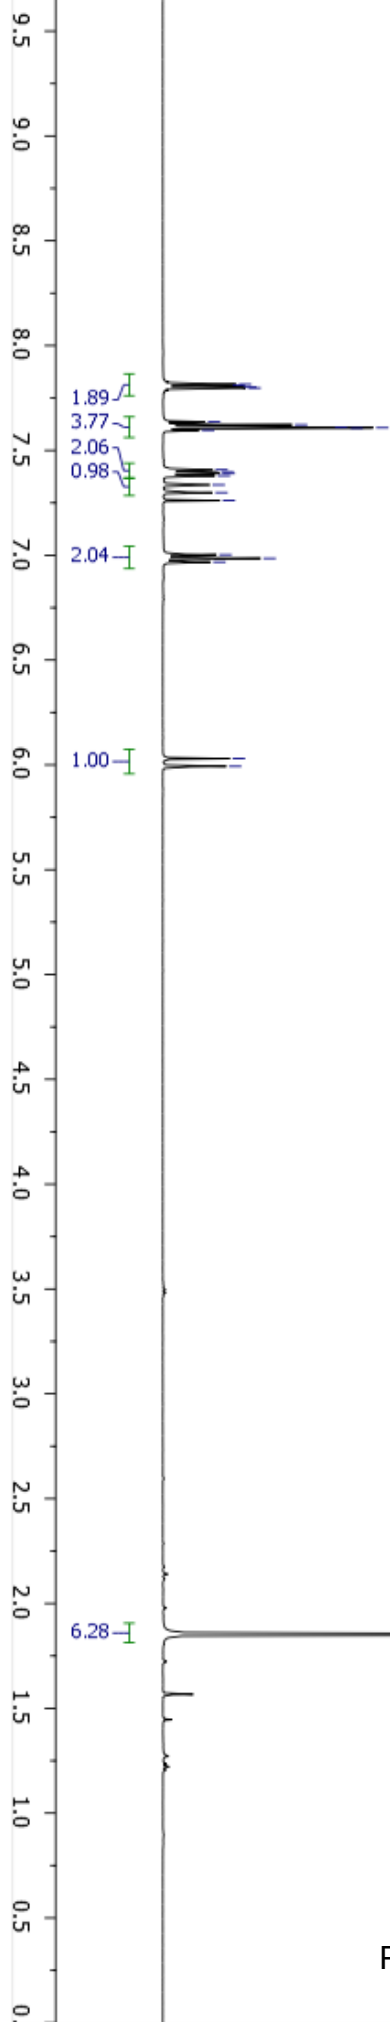

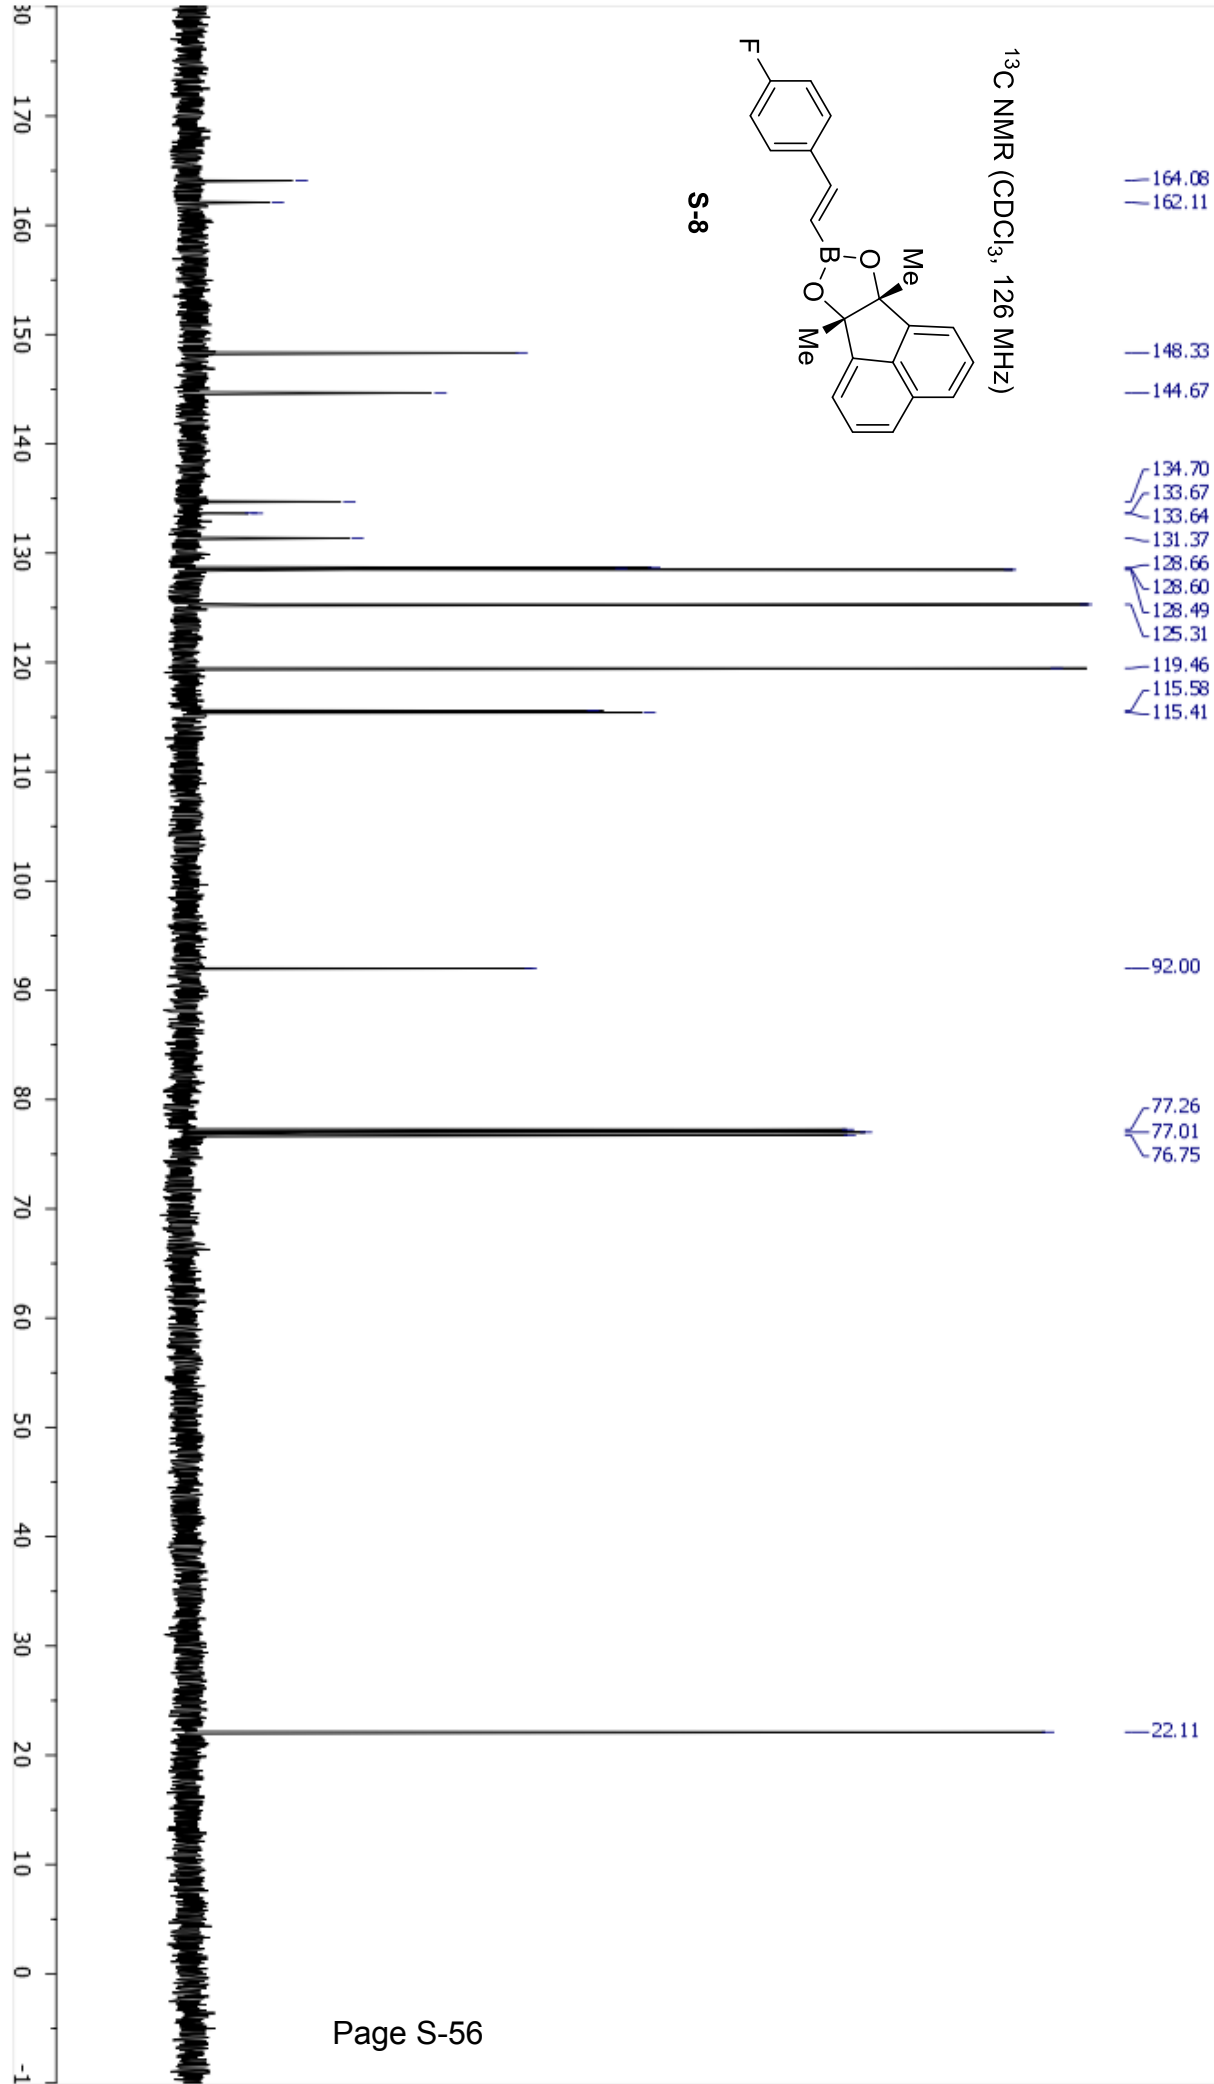



<sup>1</sup>H NMR (CDCl<sub>3</sub>, 500 MHz)

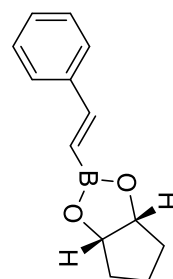

S-10

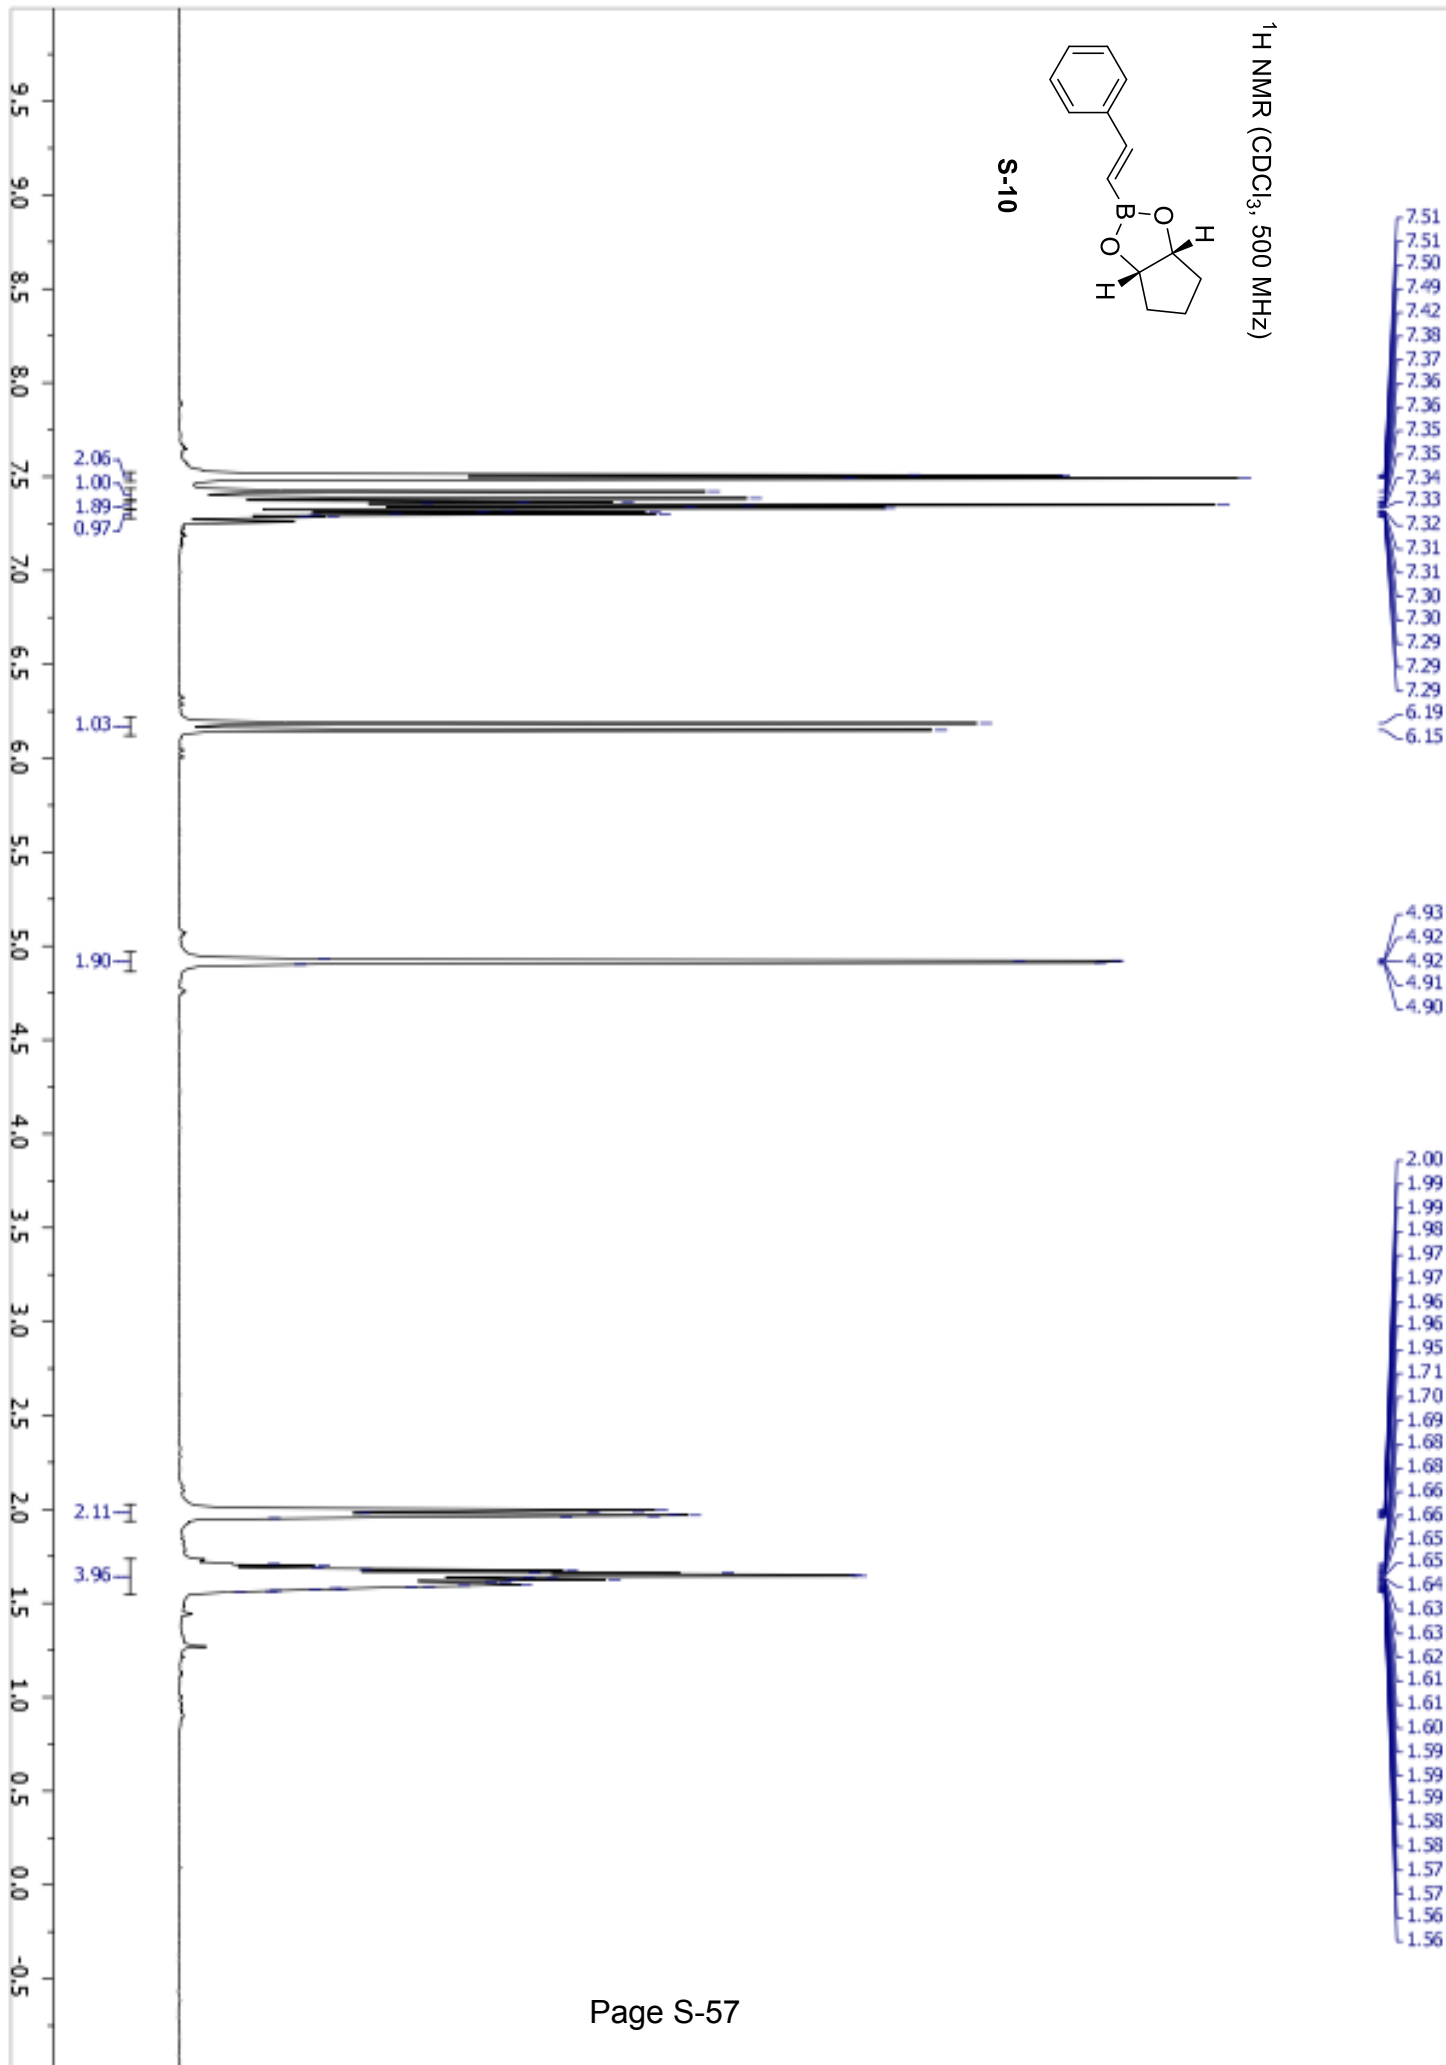

$^{13}\text{C}$  NMR ( $\text{CDCl}_3$ , 151 MHz)

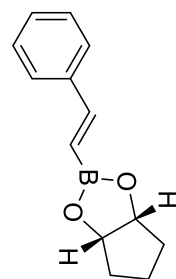

S-10

— 149.91

— 137.99

129.07  
128.71  
127.21

— 82.51

77.41  
77.16  
76.91

— 34.85

— 21.69

<sup>1</sup>H NMR (CDCl<sub>3</sub>, 600 MHz)

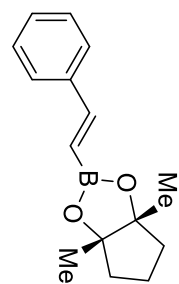

S-12

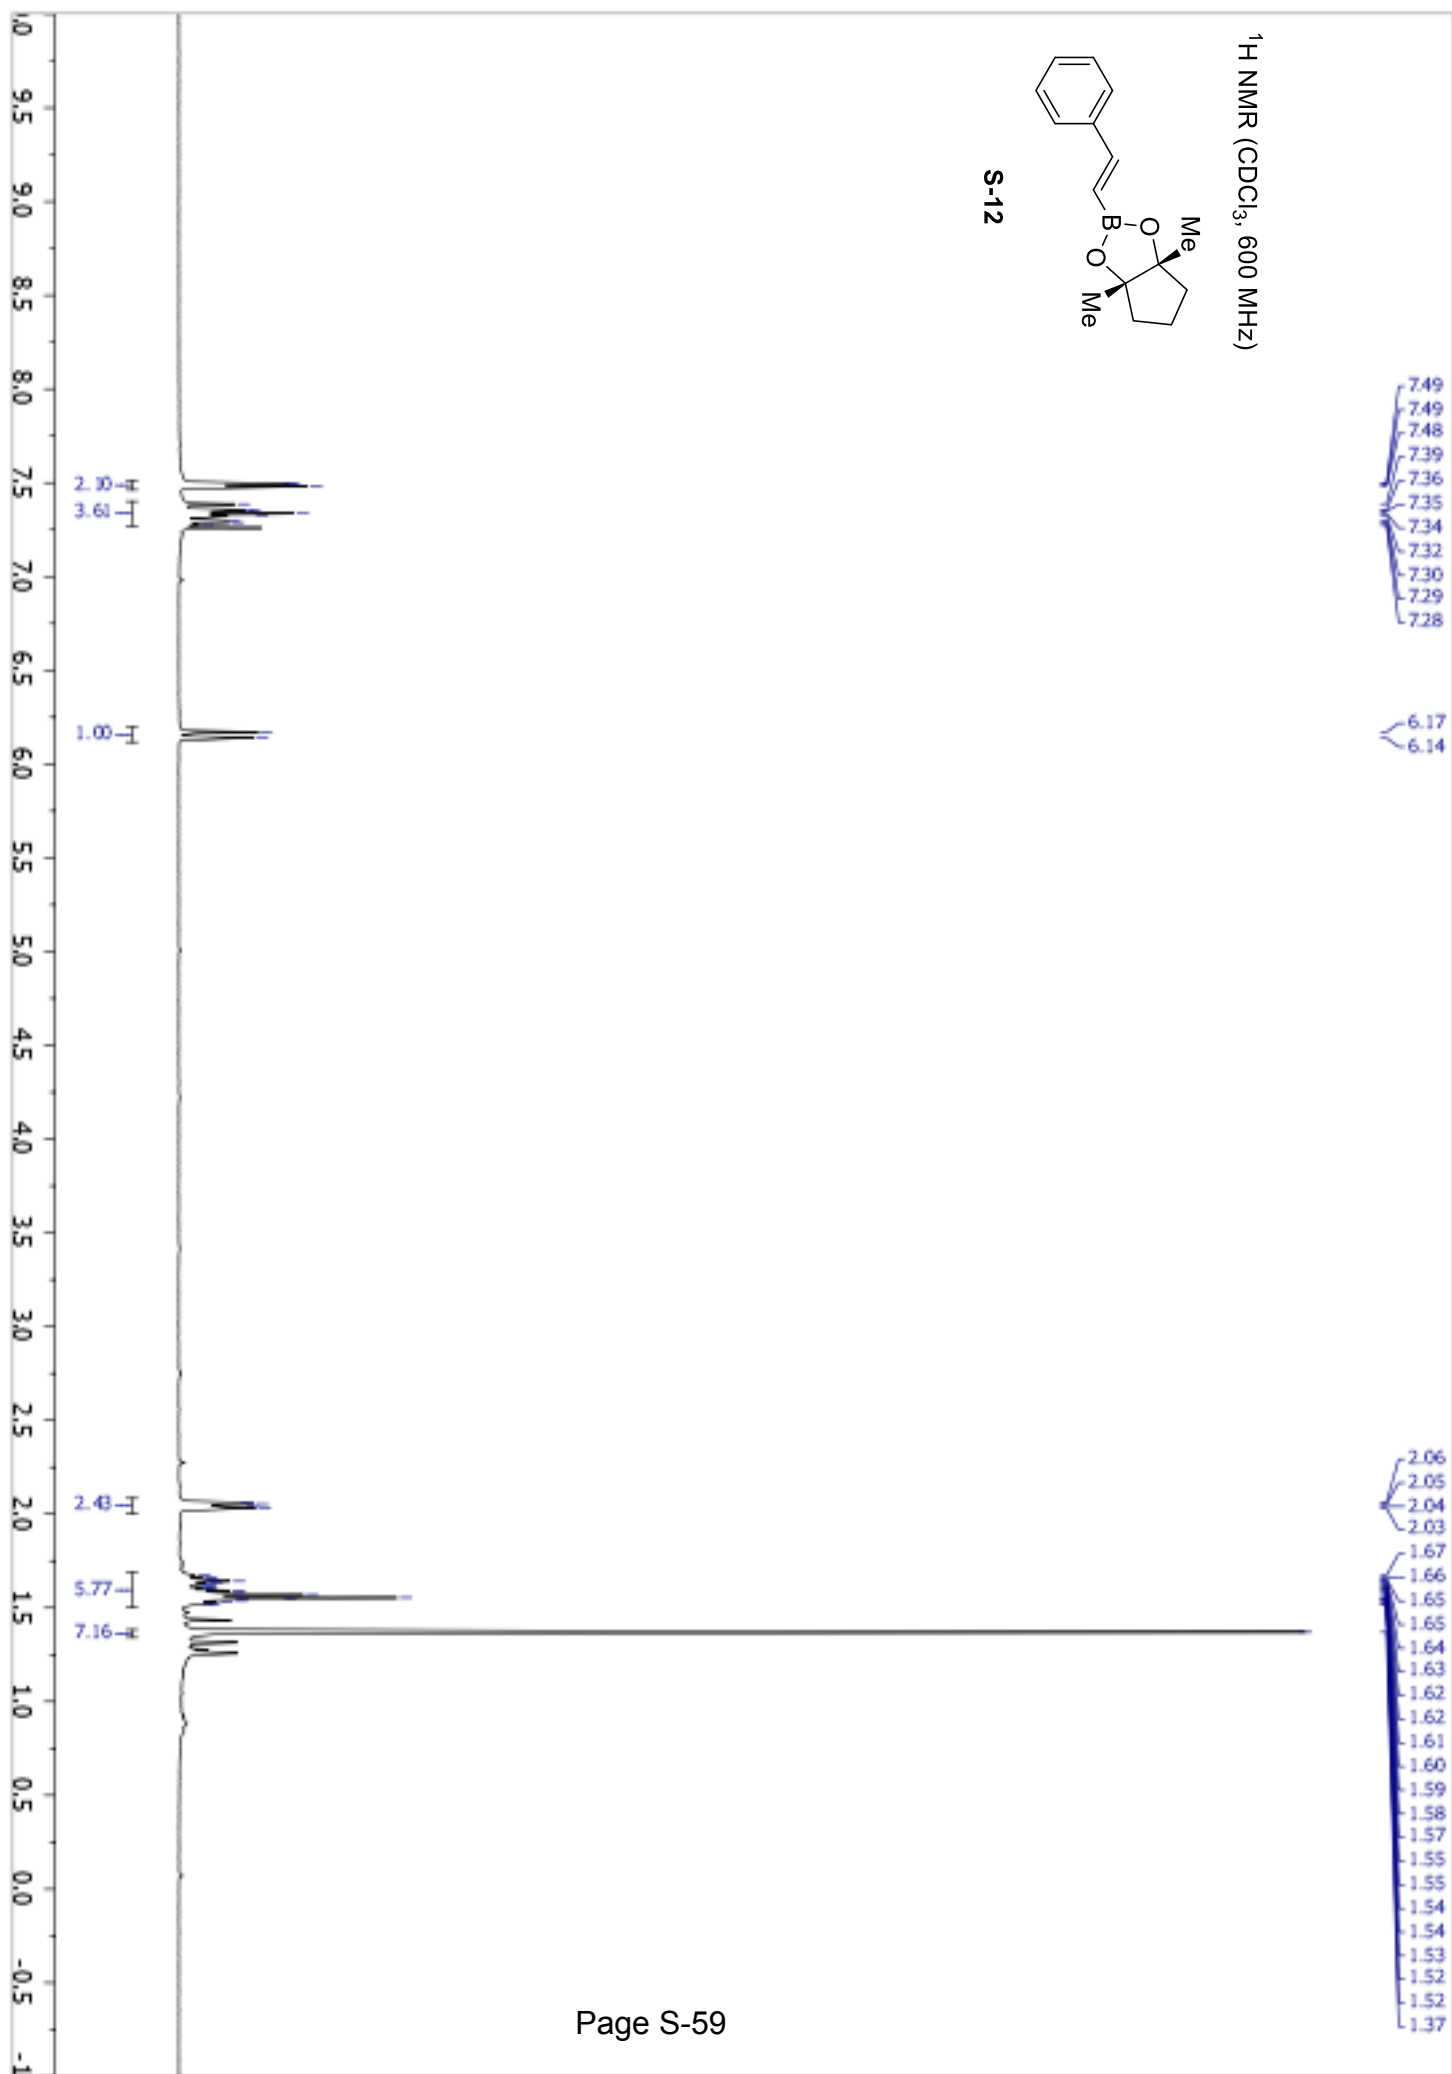

$^{13}\text{C}$  NMR ( $\text{CDCl}_3$ , 151 MHz)

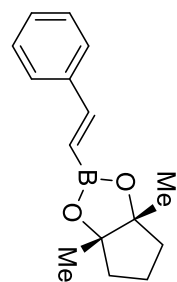

S-12

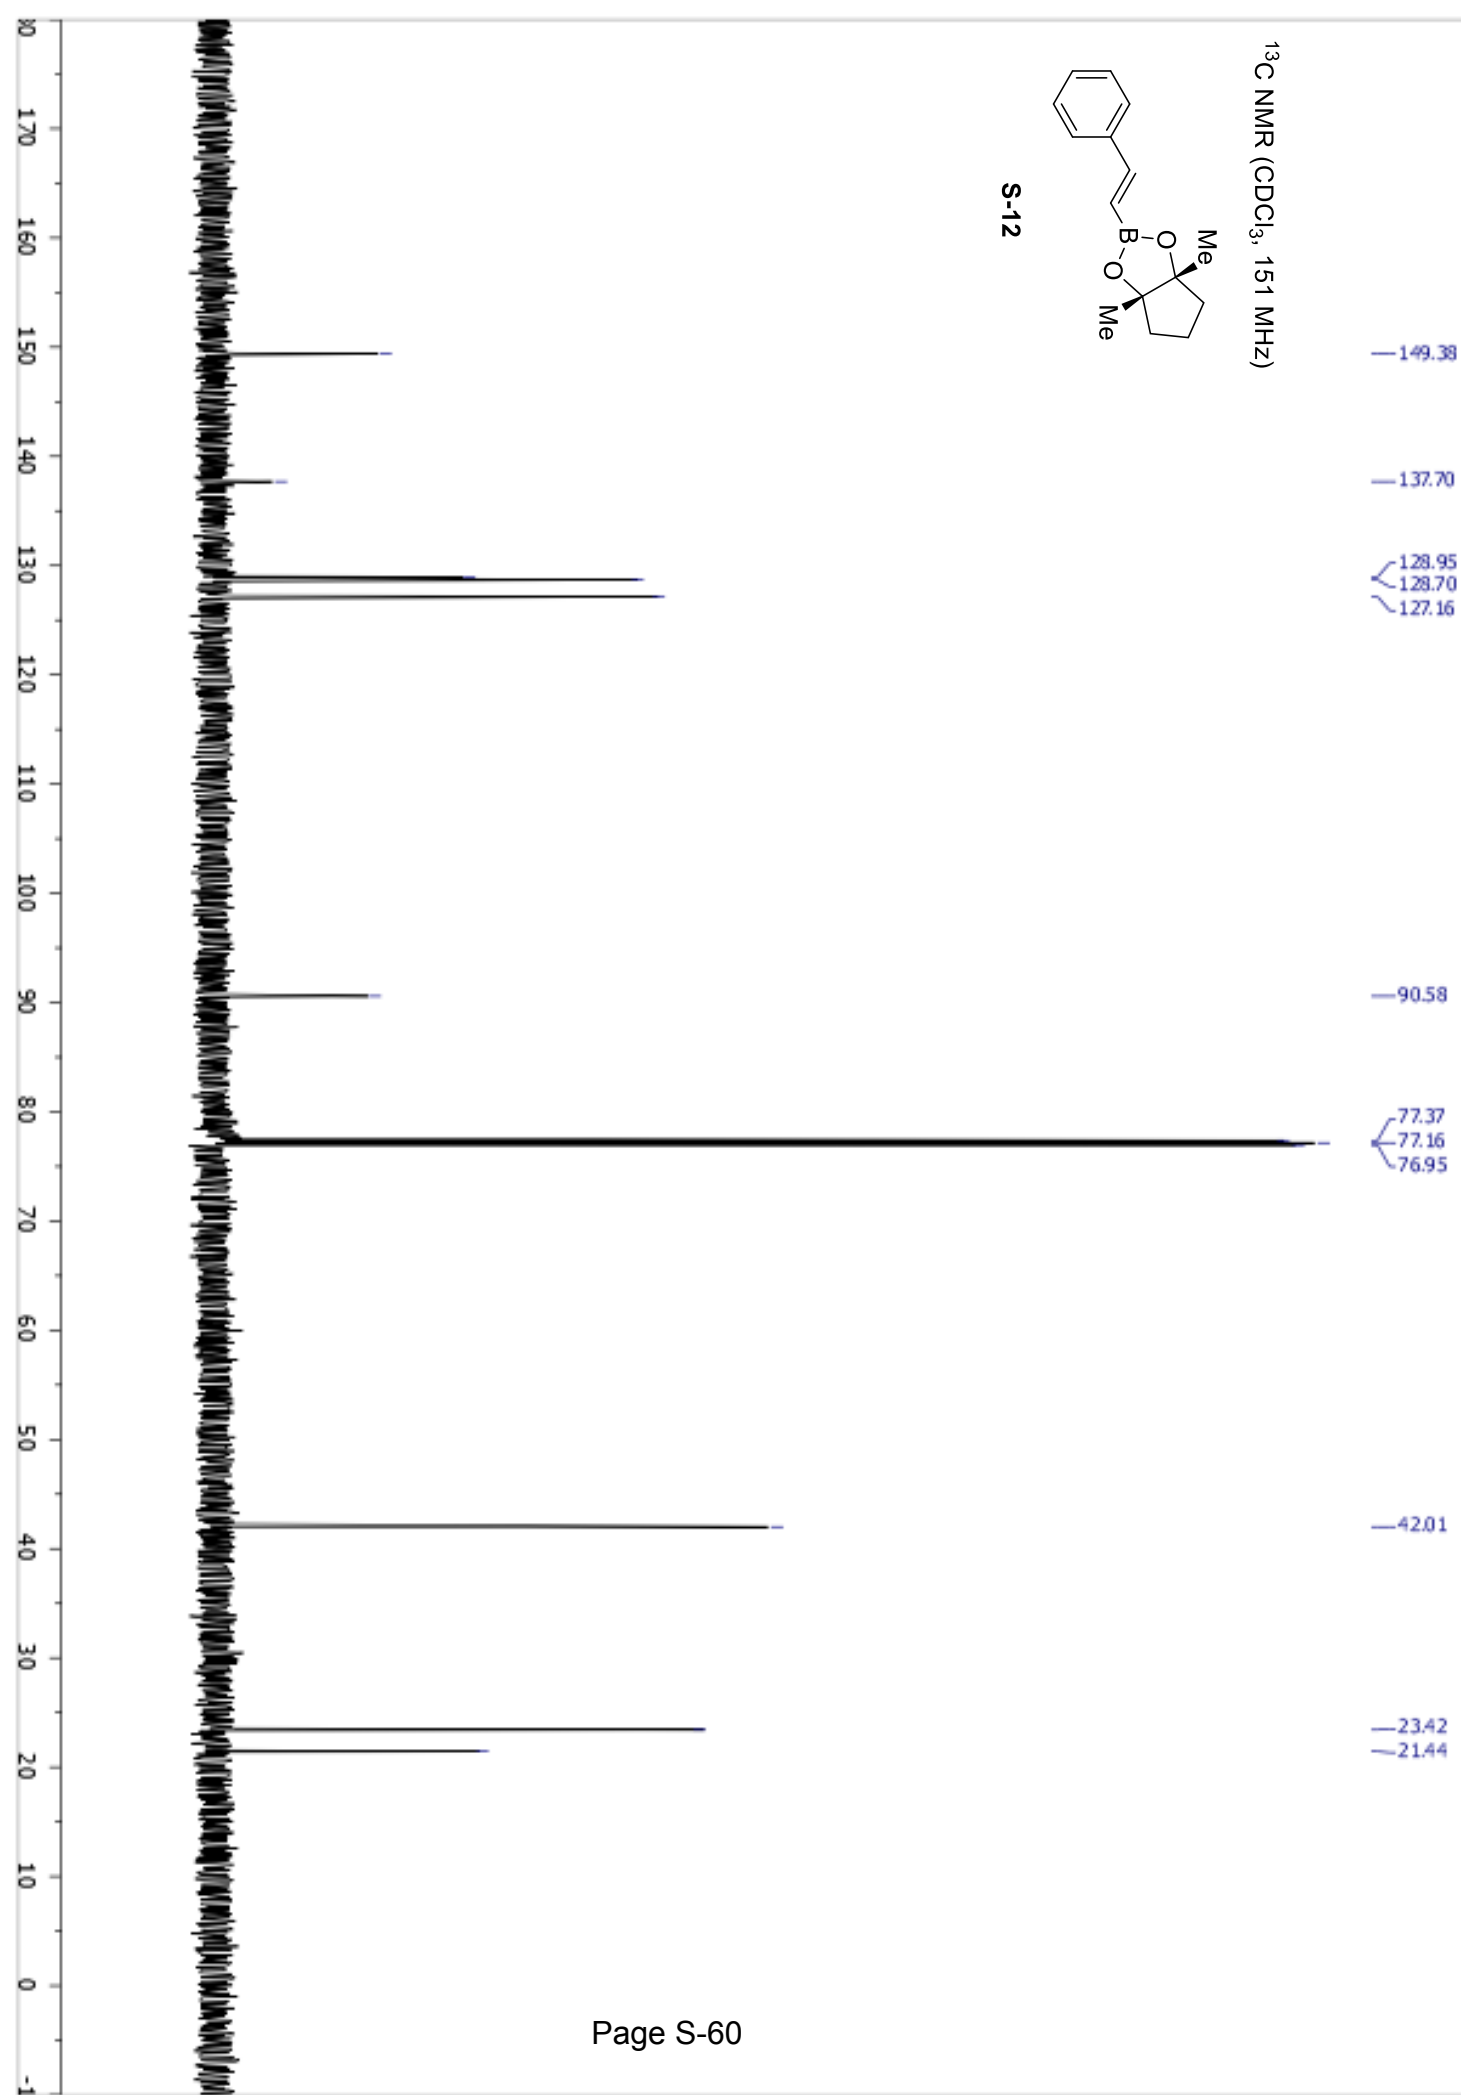

<sup>1</sup>H NMR (CDCl<sub>3</sub>, 500 MHz)

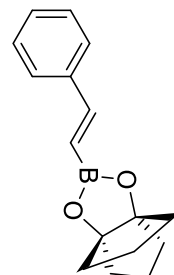

S-13

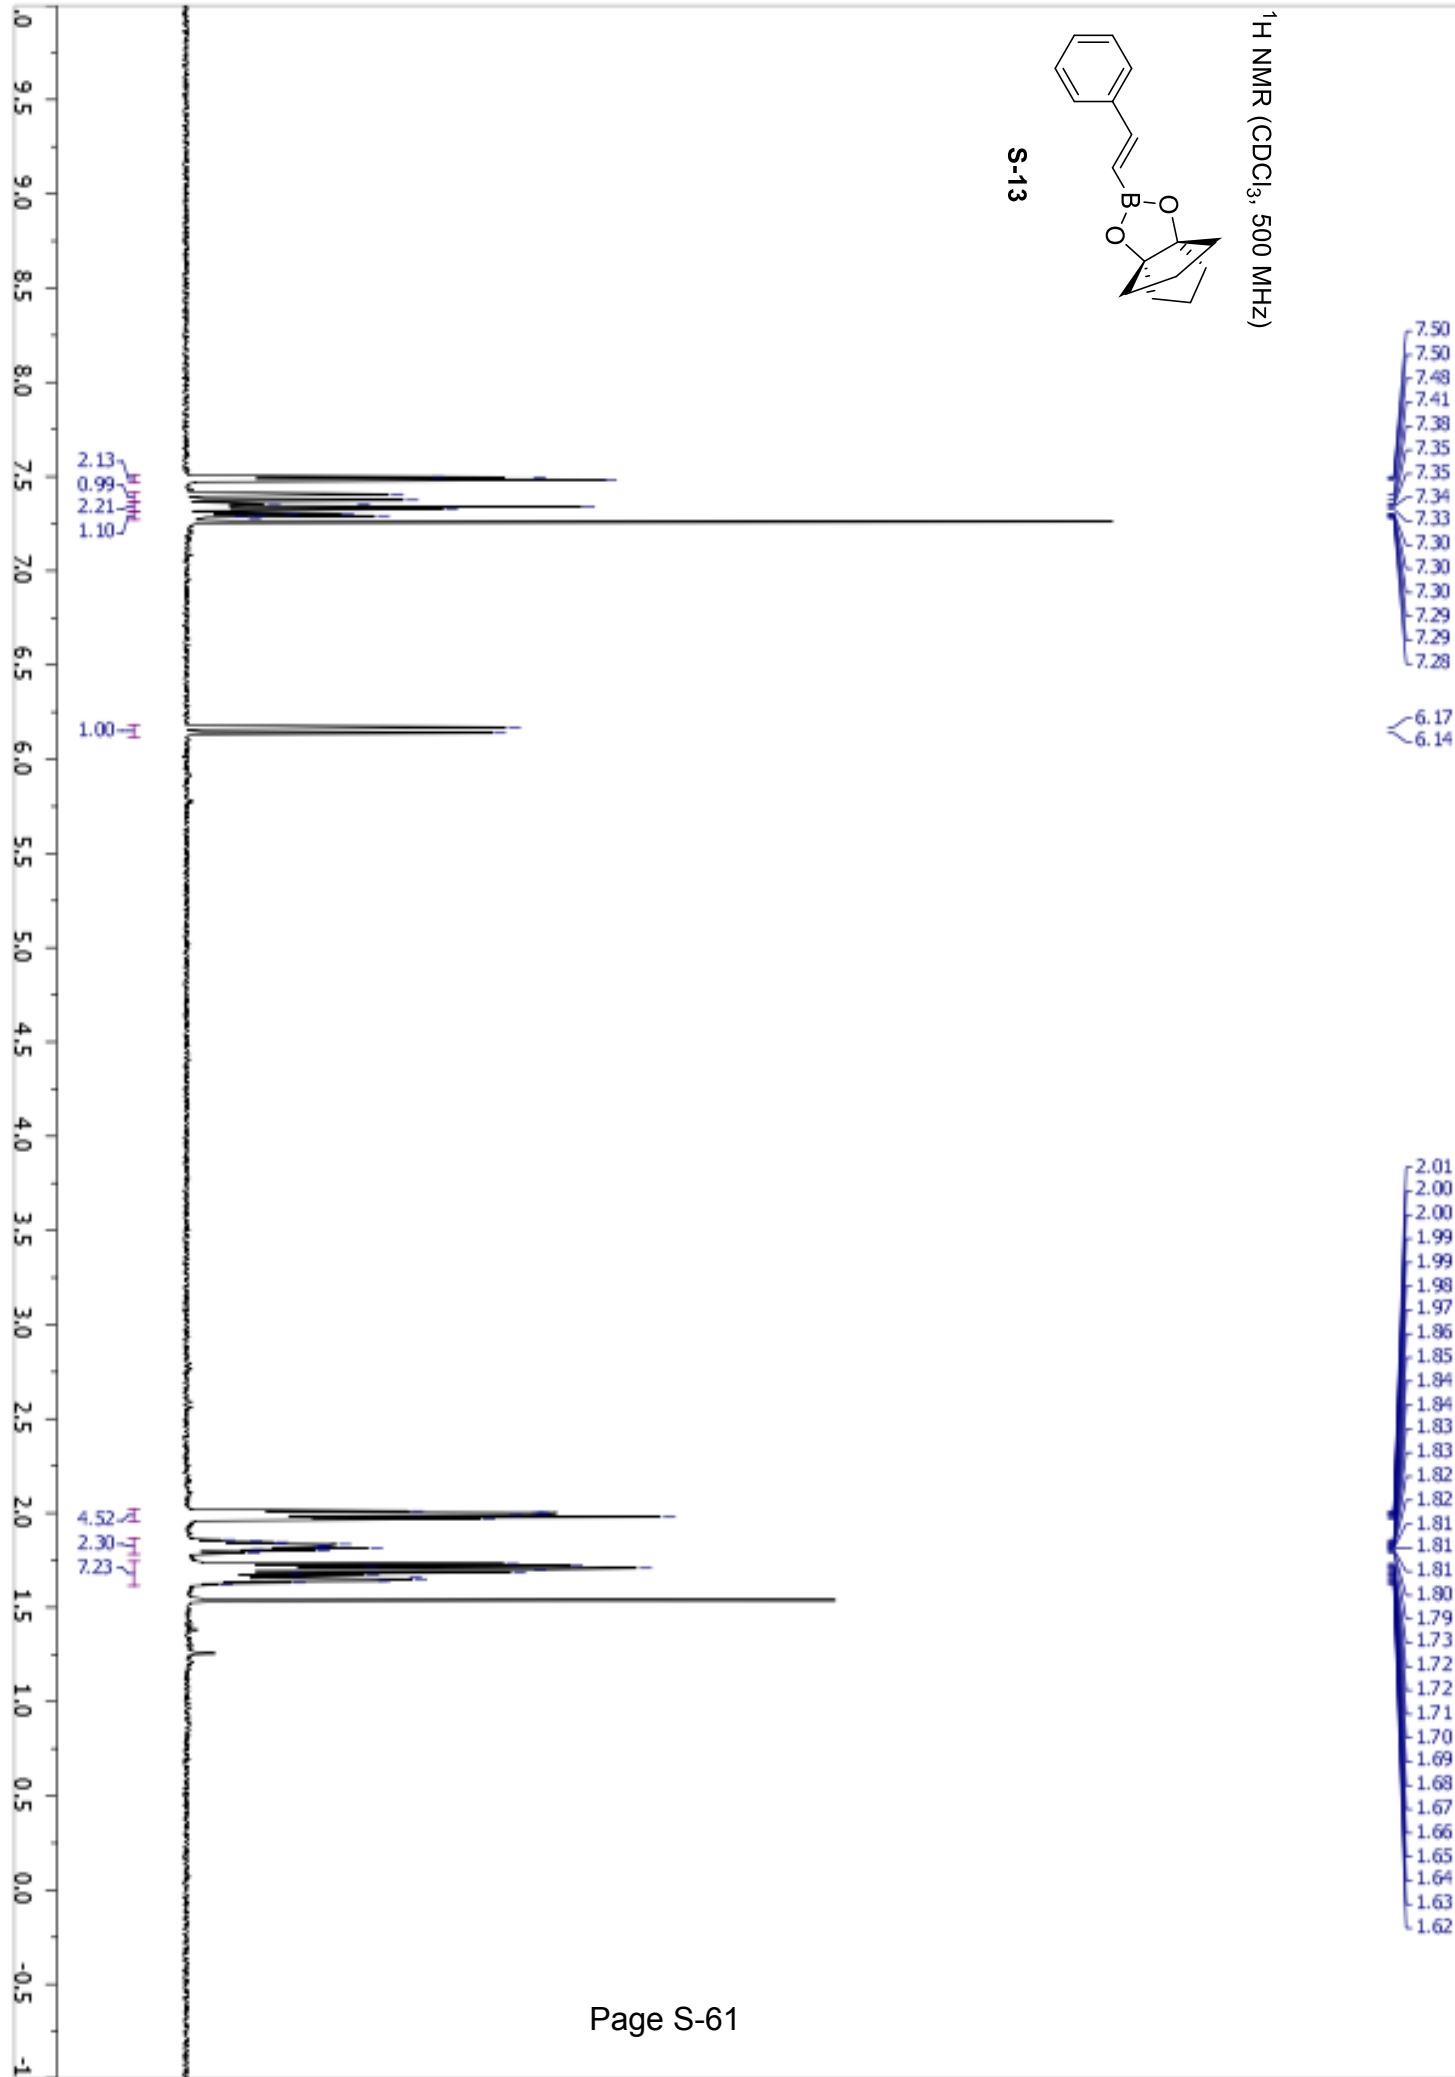

$^{13}\text{C}$  NMR ( $\text{CDCl}_3$ , 126 MHz)

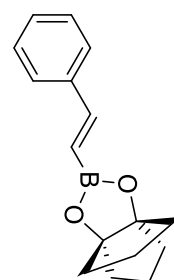

S-13

— 149.59

— 137.62

128.99  
128.69  
127.15

— 99.83

77.41  
77.16  
76.91

— 39.01

— 25.04

7.51  
7.50  
7.50  
7.49  
7.49  
7.42  
7.39  
7.35  
7.35  
7.34  
7.33  
7.33  
7.32  
7.30  
7.30  
7.30  
7.29  
7.29  
7.28  
7.28  
7.27  
7.27  
6.22  
6.19

<sup>1</sup>H NMR (CDCl<sub>3</sub>, 600 MHz)

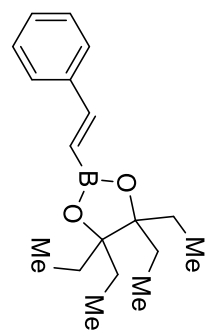

S-14

1.79  
1.78  
1.77  
1.76  
1.74  
1.73  
1.73  
1.72  
1.71  
1.70  
1.68  
1.67  
0.98  
0.96  
0.95

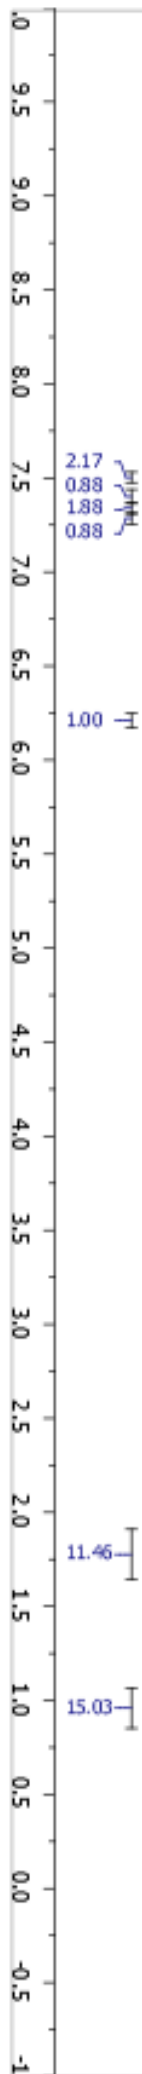

$^{13}\text{C}$  NMR ( $\text{CDCl}_3$ , 126 MHz)

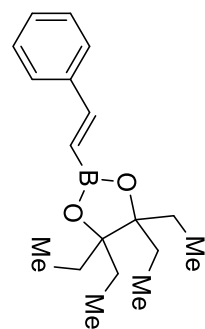

S-14

— 149.39

— 137.75

128.90  
128.67  
127.18

— 88.51

77.41  
77.16  
76.91

— 26.58

— 9.01



$^1\text{H}$  NMR ( $\text{CDCl}_3$ , 600 MHz)

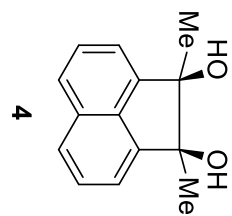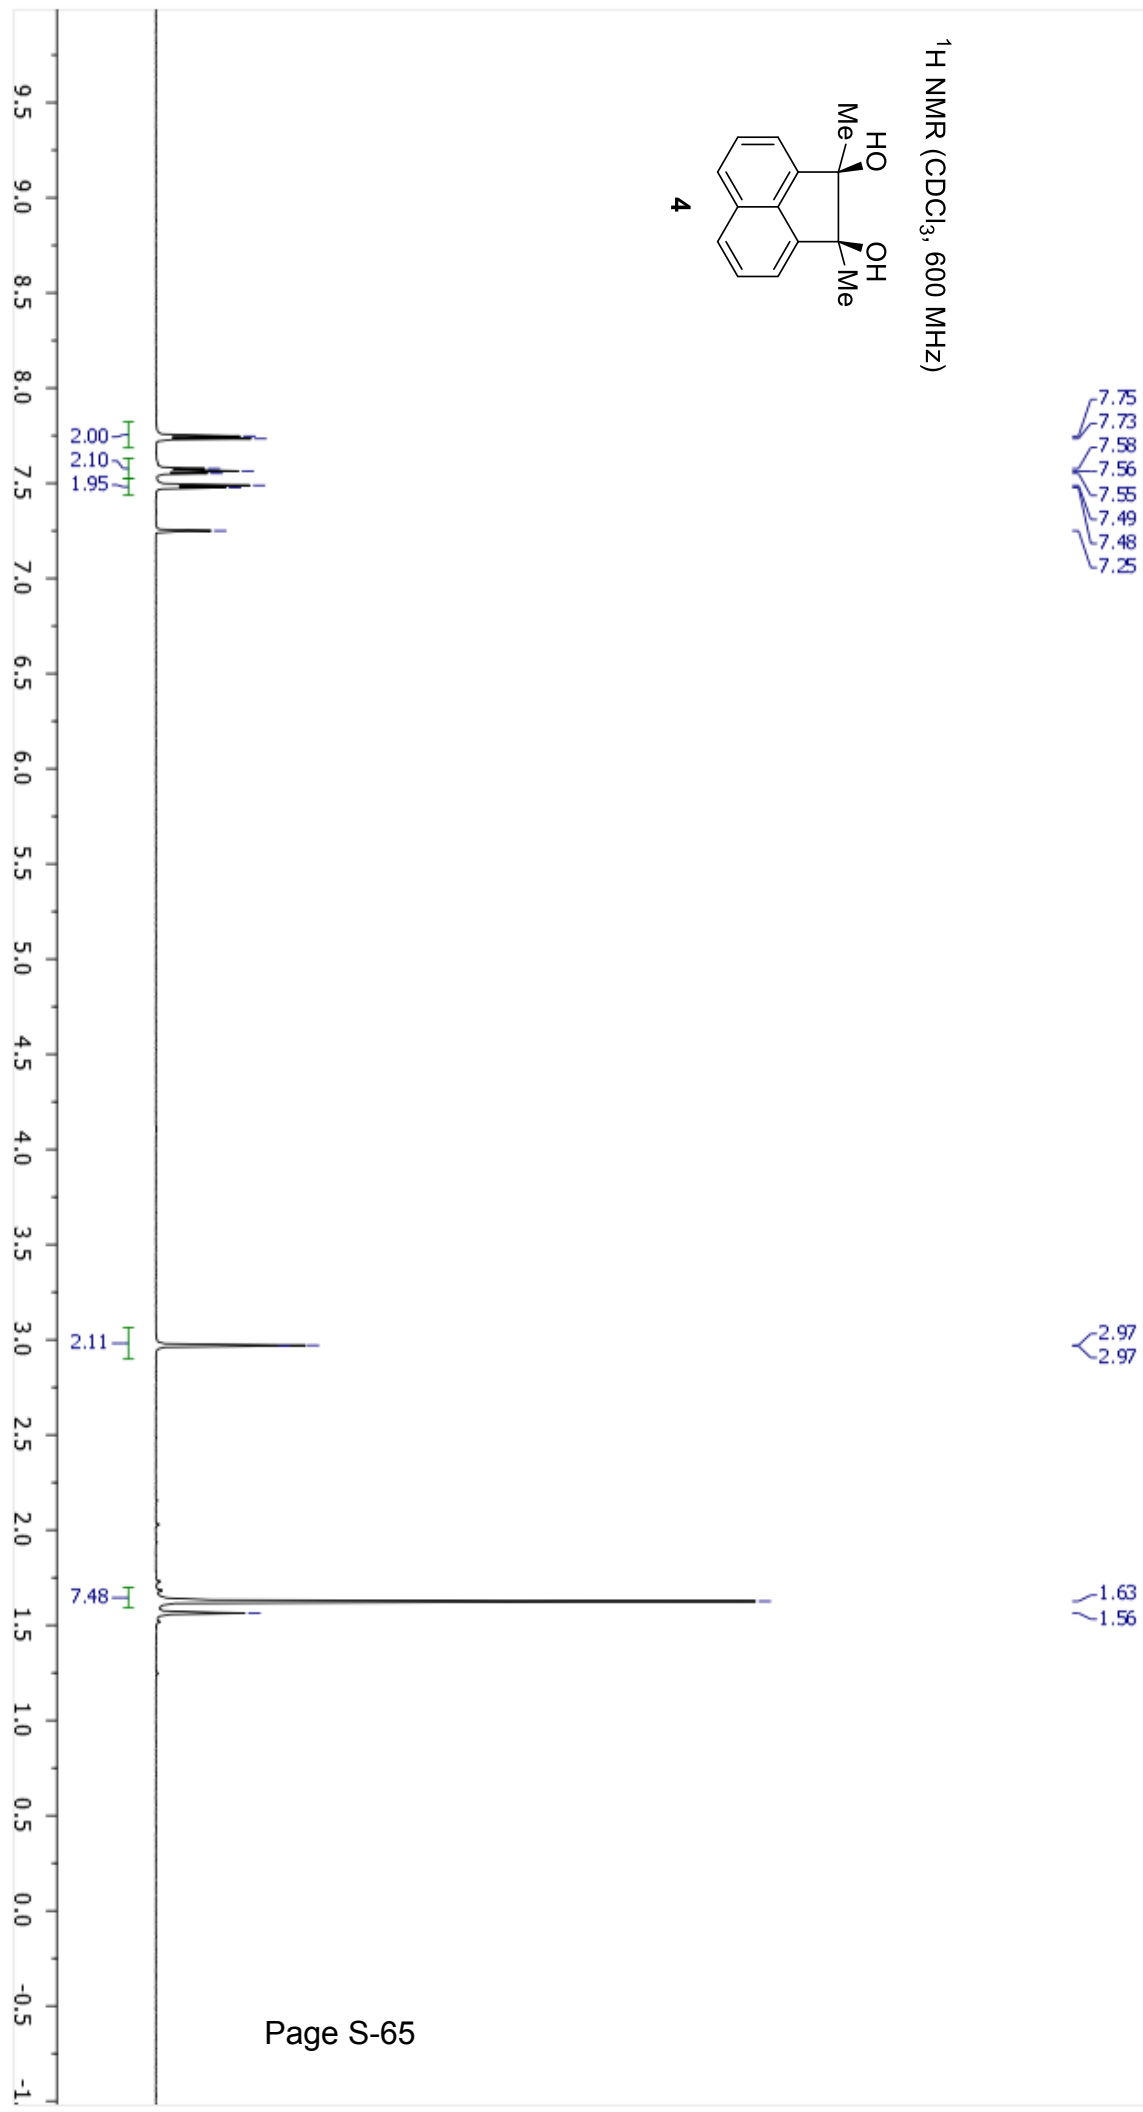

$^{13}\text{C}$  NMR ( $\text{CDCl}_3$ , 151 MHz)

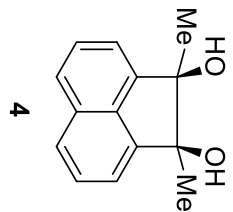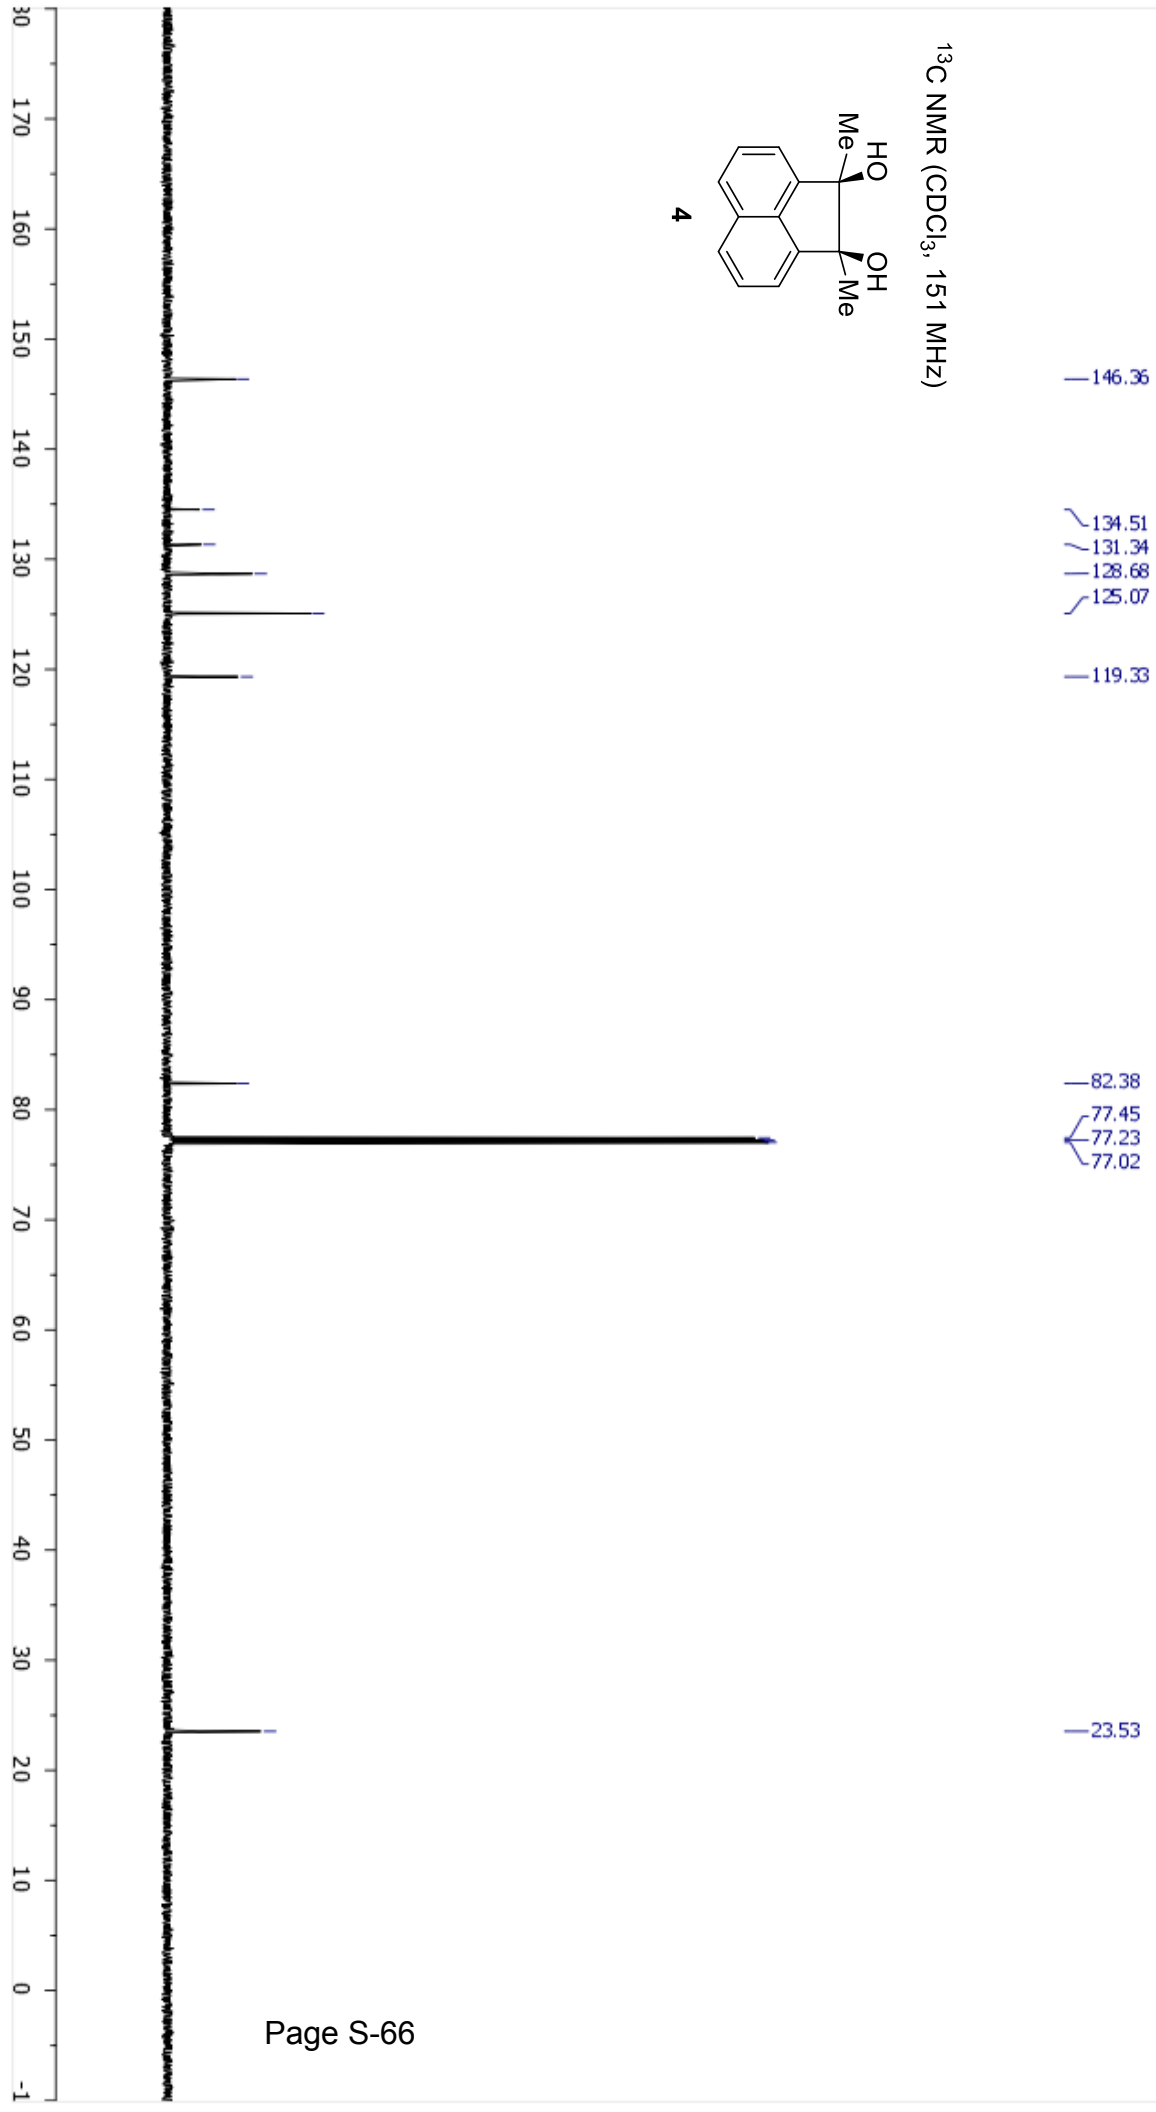

<sup>1</sup>H NMR (CDCl<sub>3</sub>, 500 MHz)

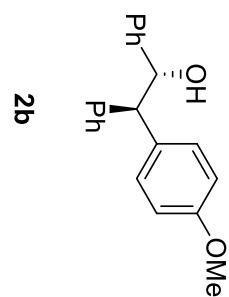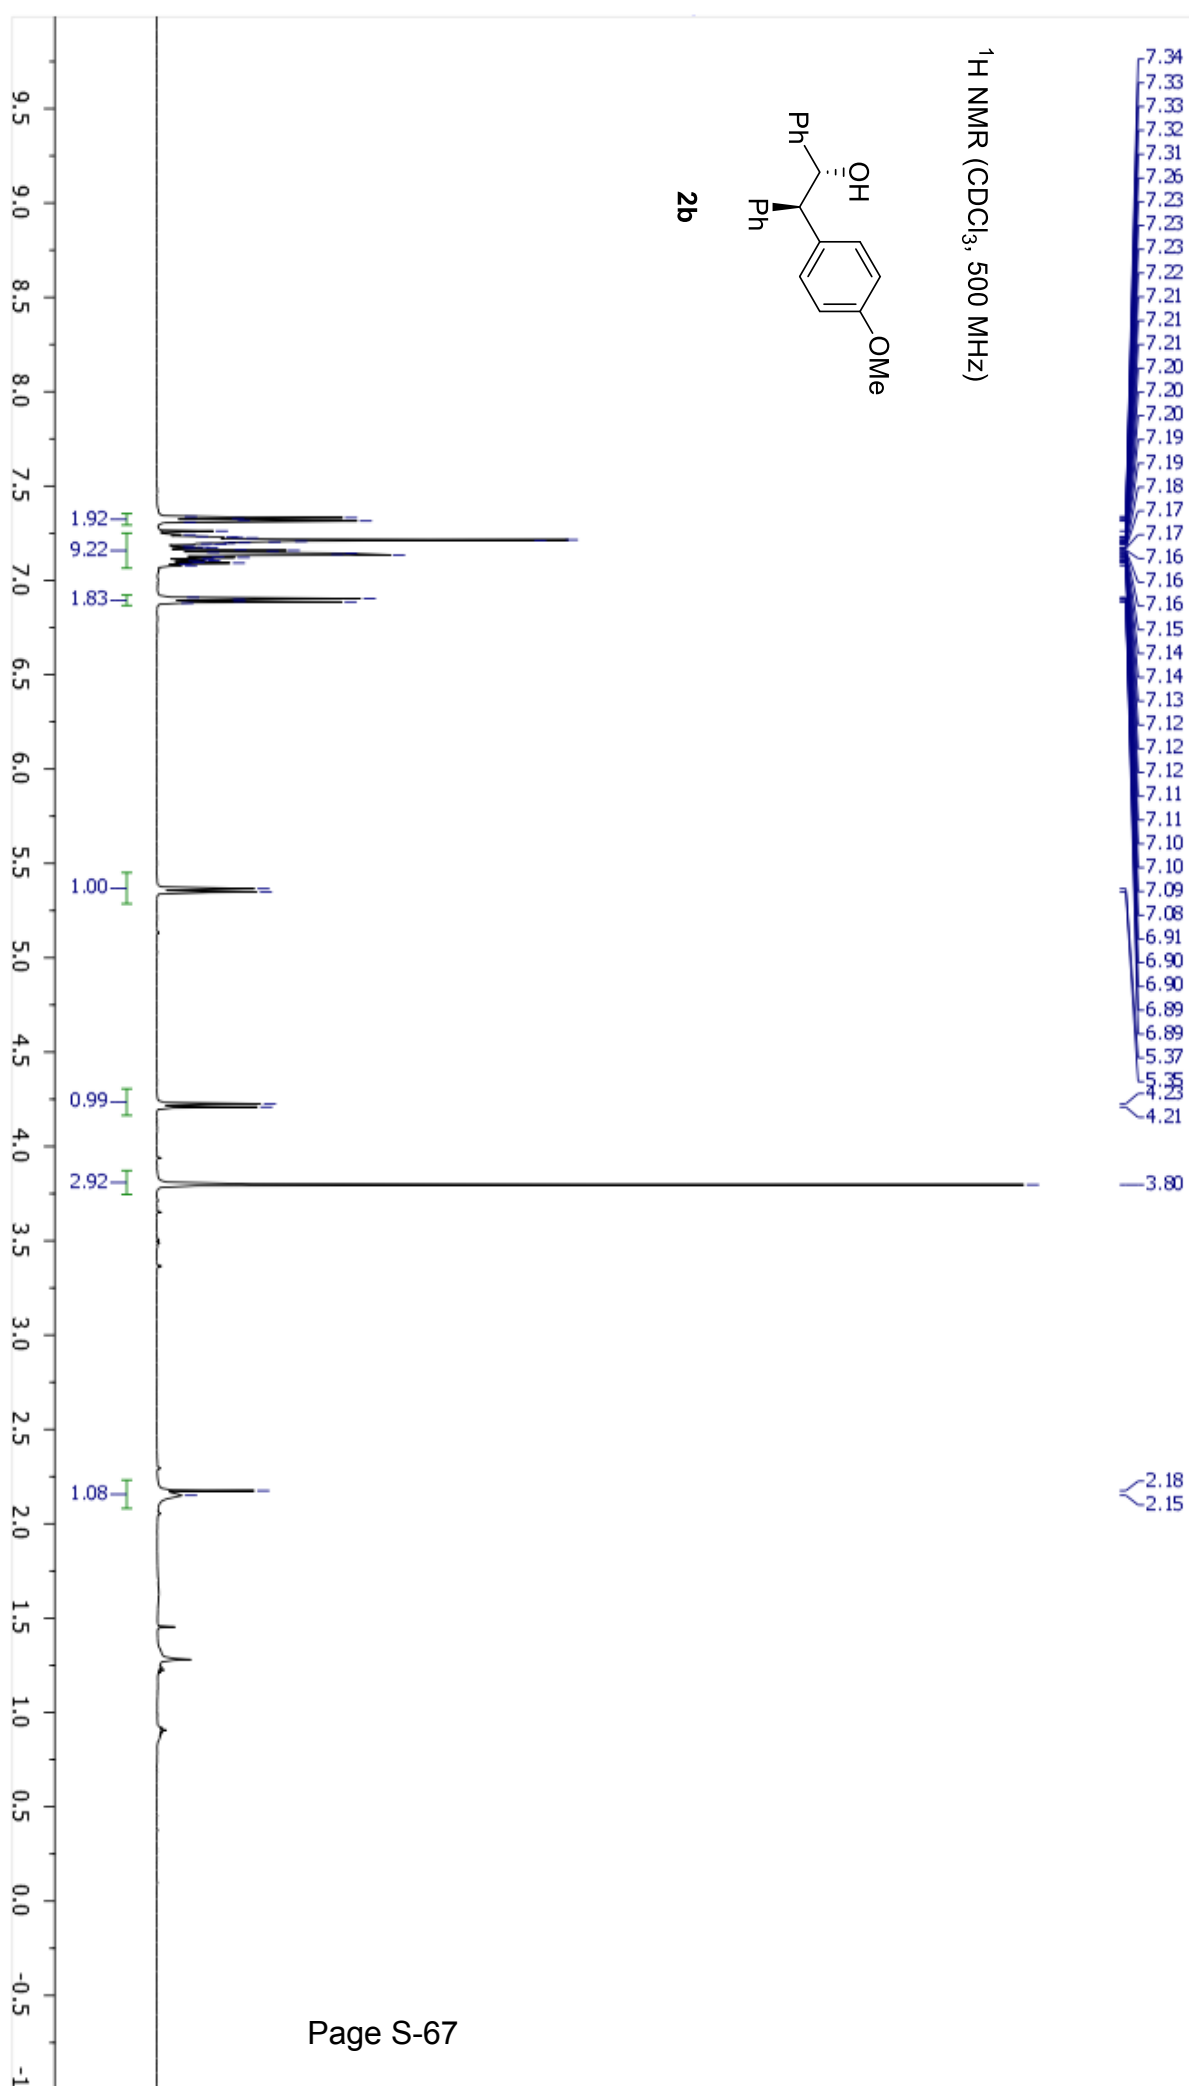

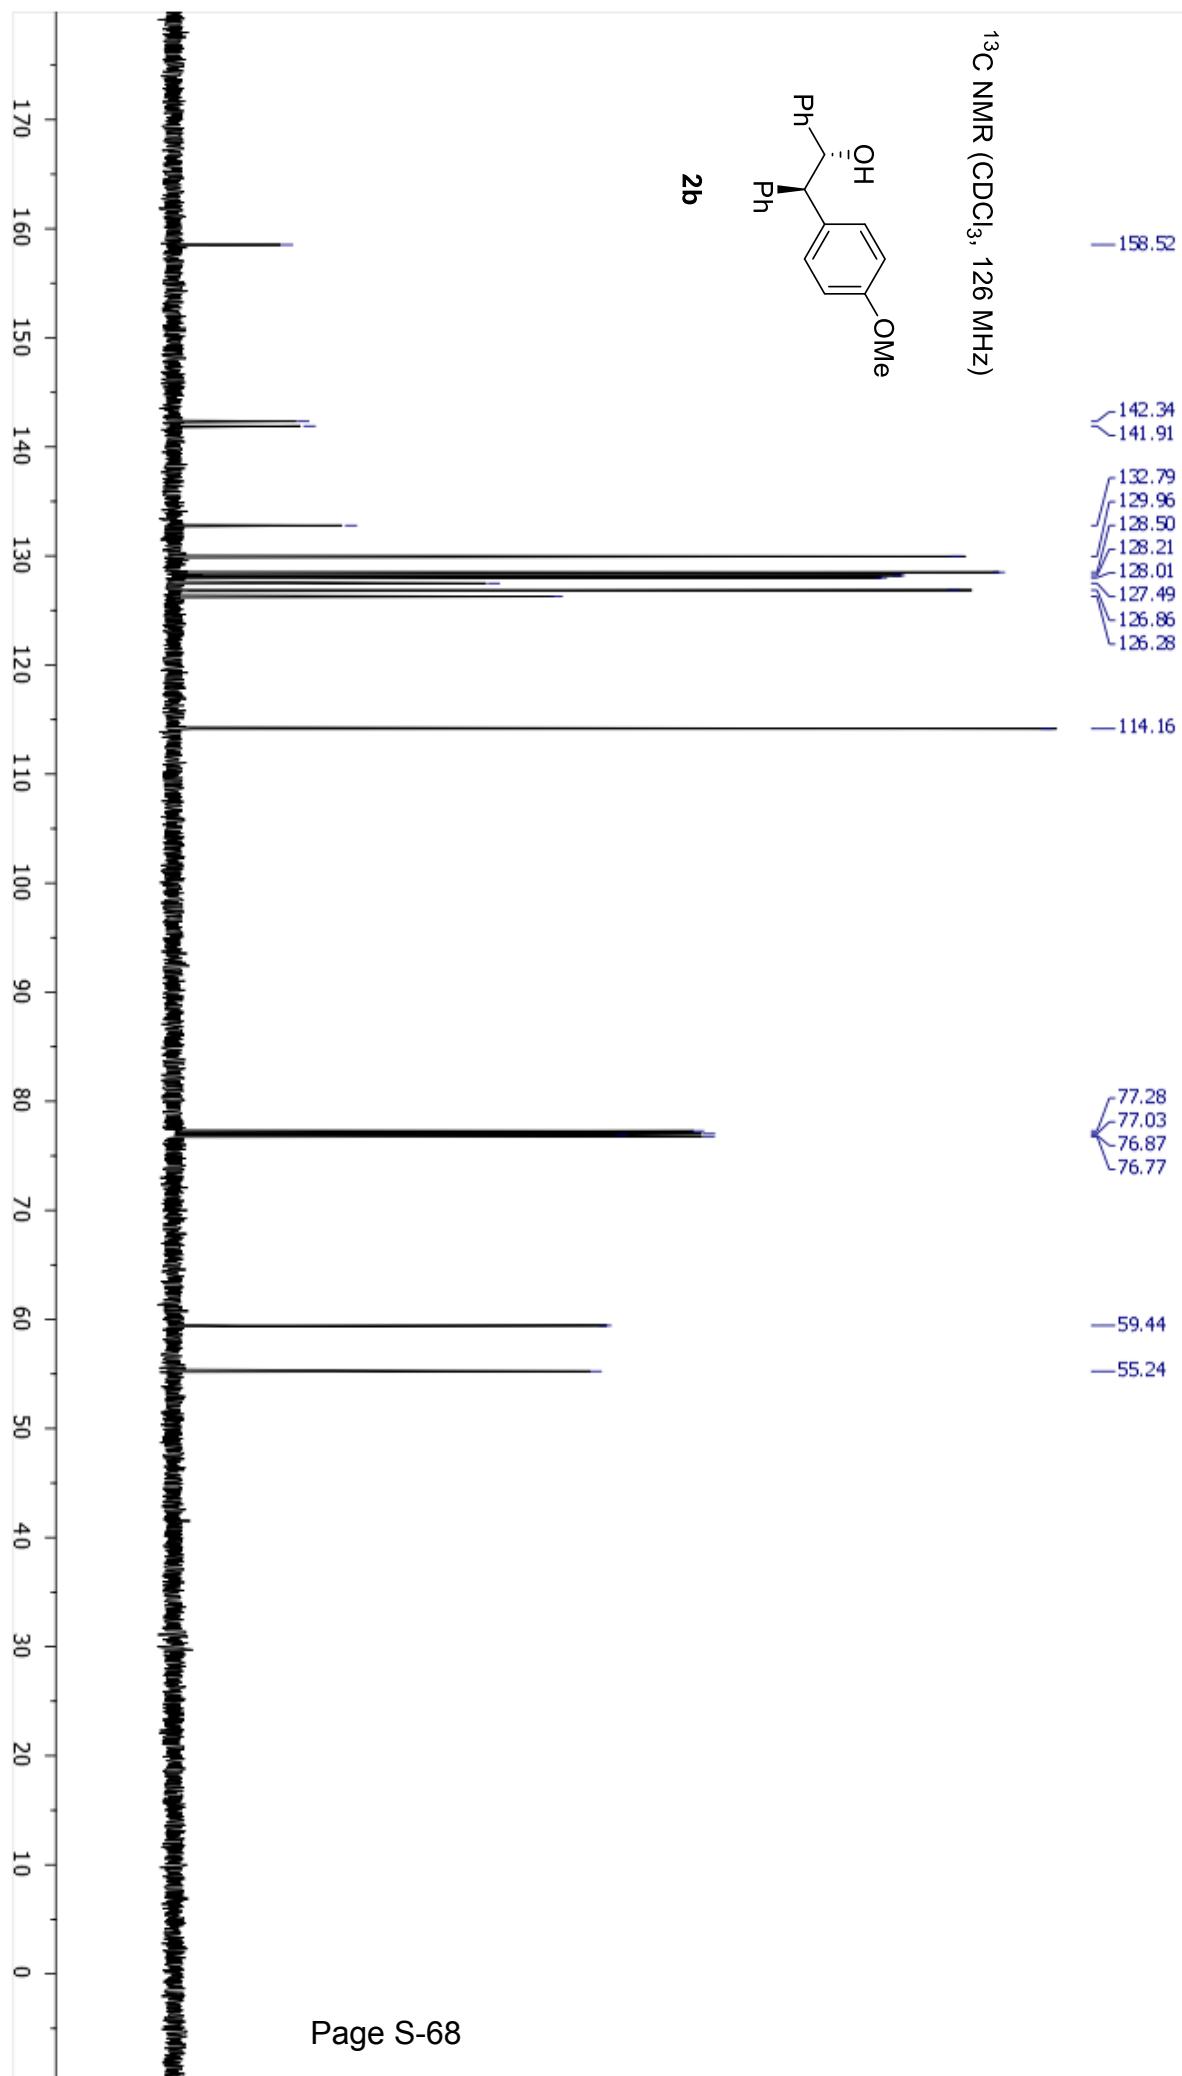

<sup>1</sup>H NMR (CDCl<sub>3</sub>, 600 MHz)

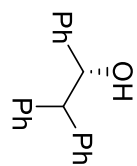

7

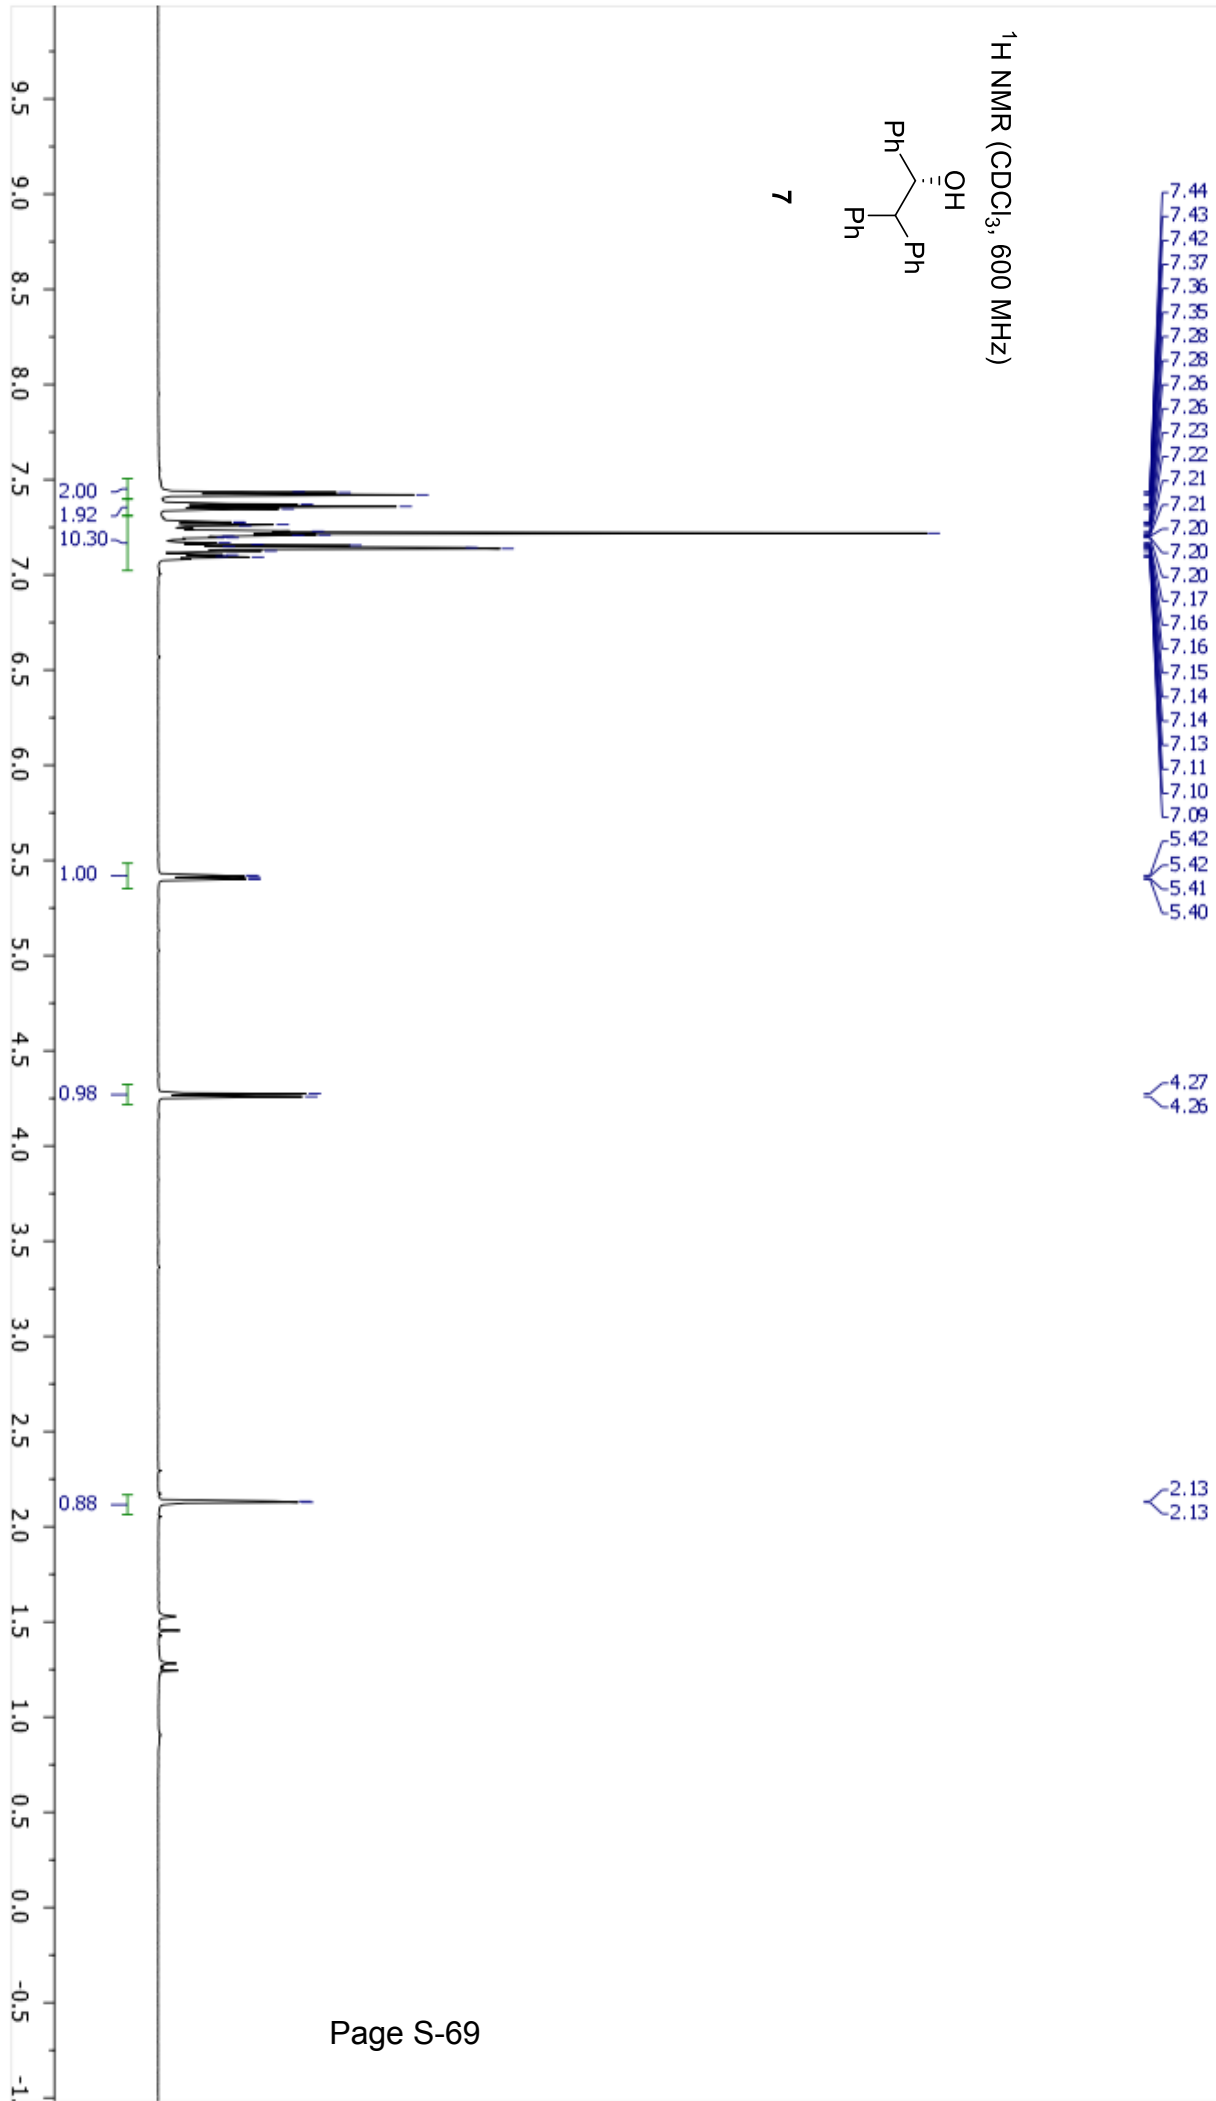

<sup>13</sup>C NMR (CDCl<sub>3</sub>, 126 MHz)

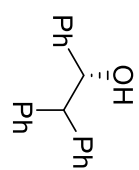

7

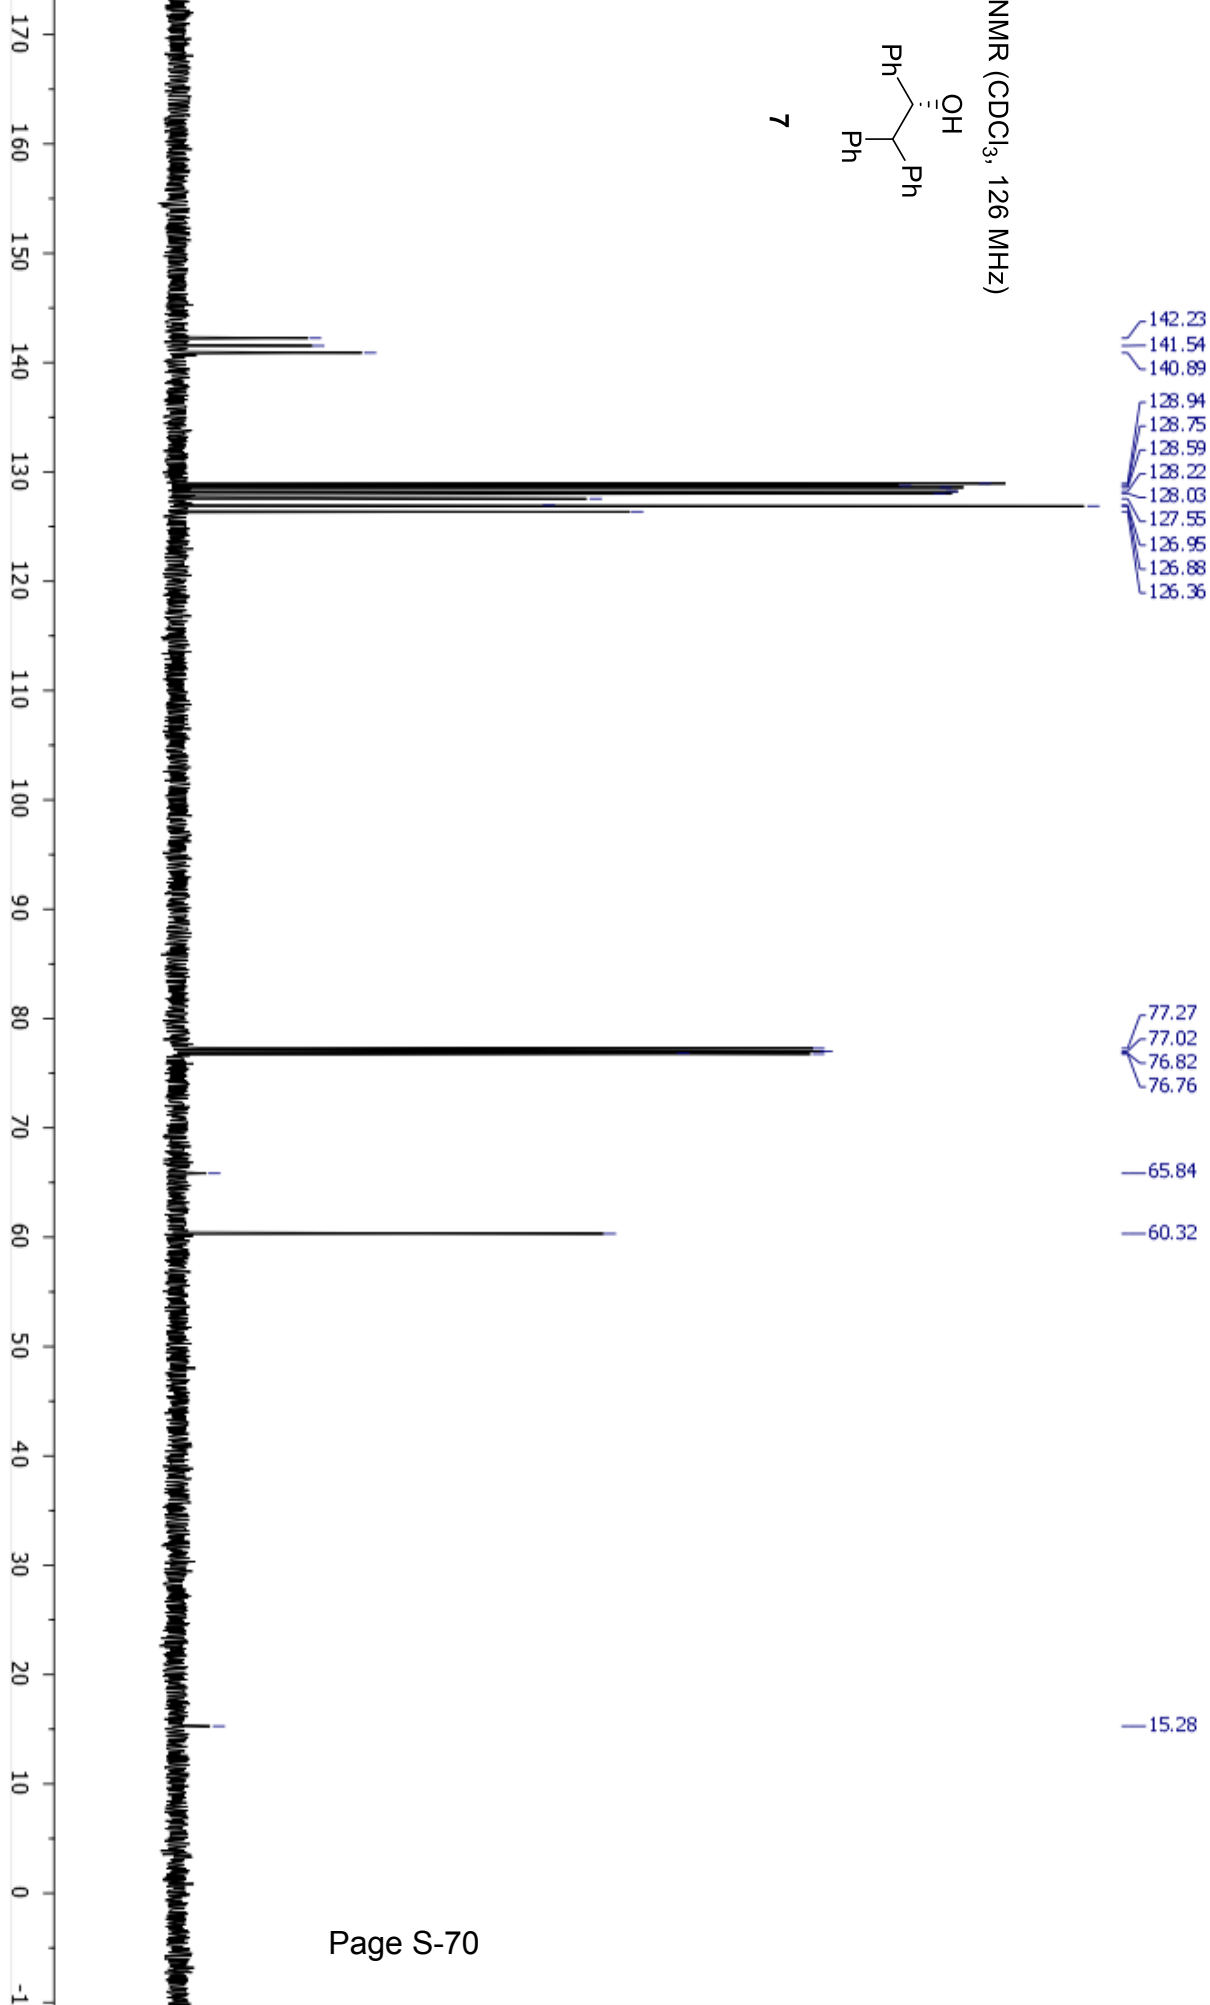

<sup>1</sup>H NMR (CDCl<sub>3</sub>, 600 MHz)

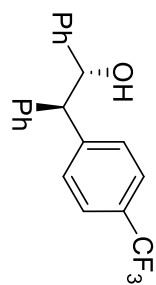

8

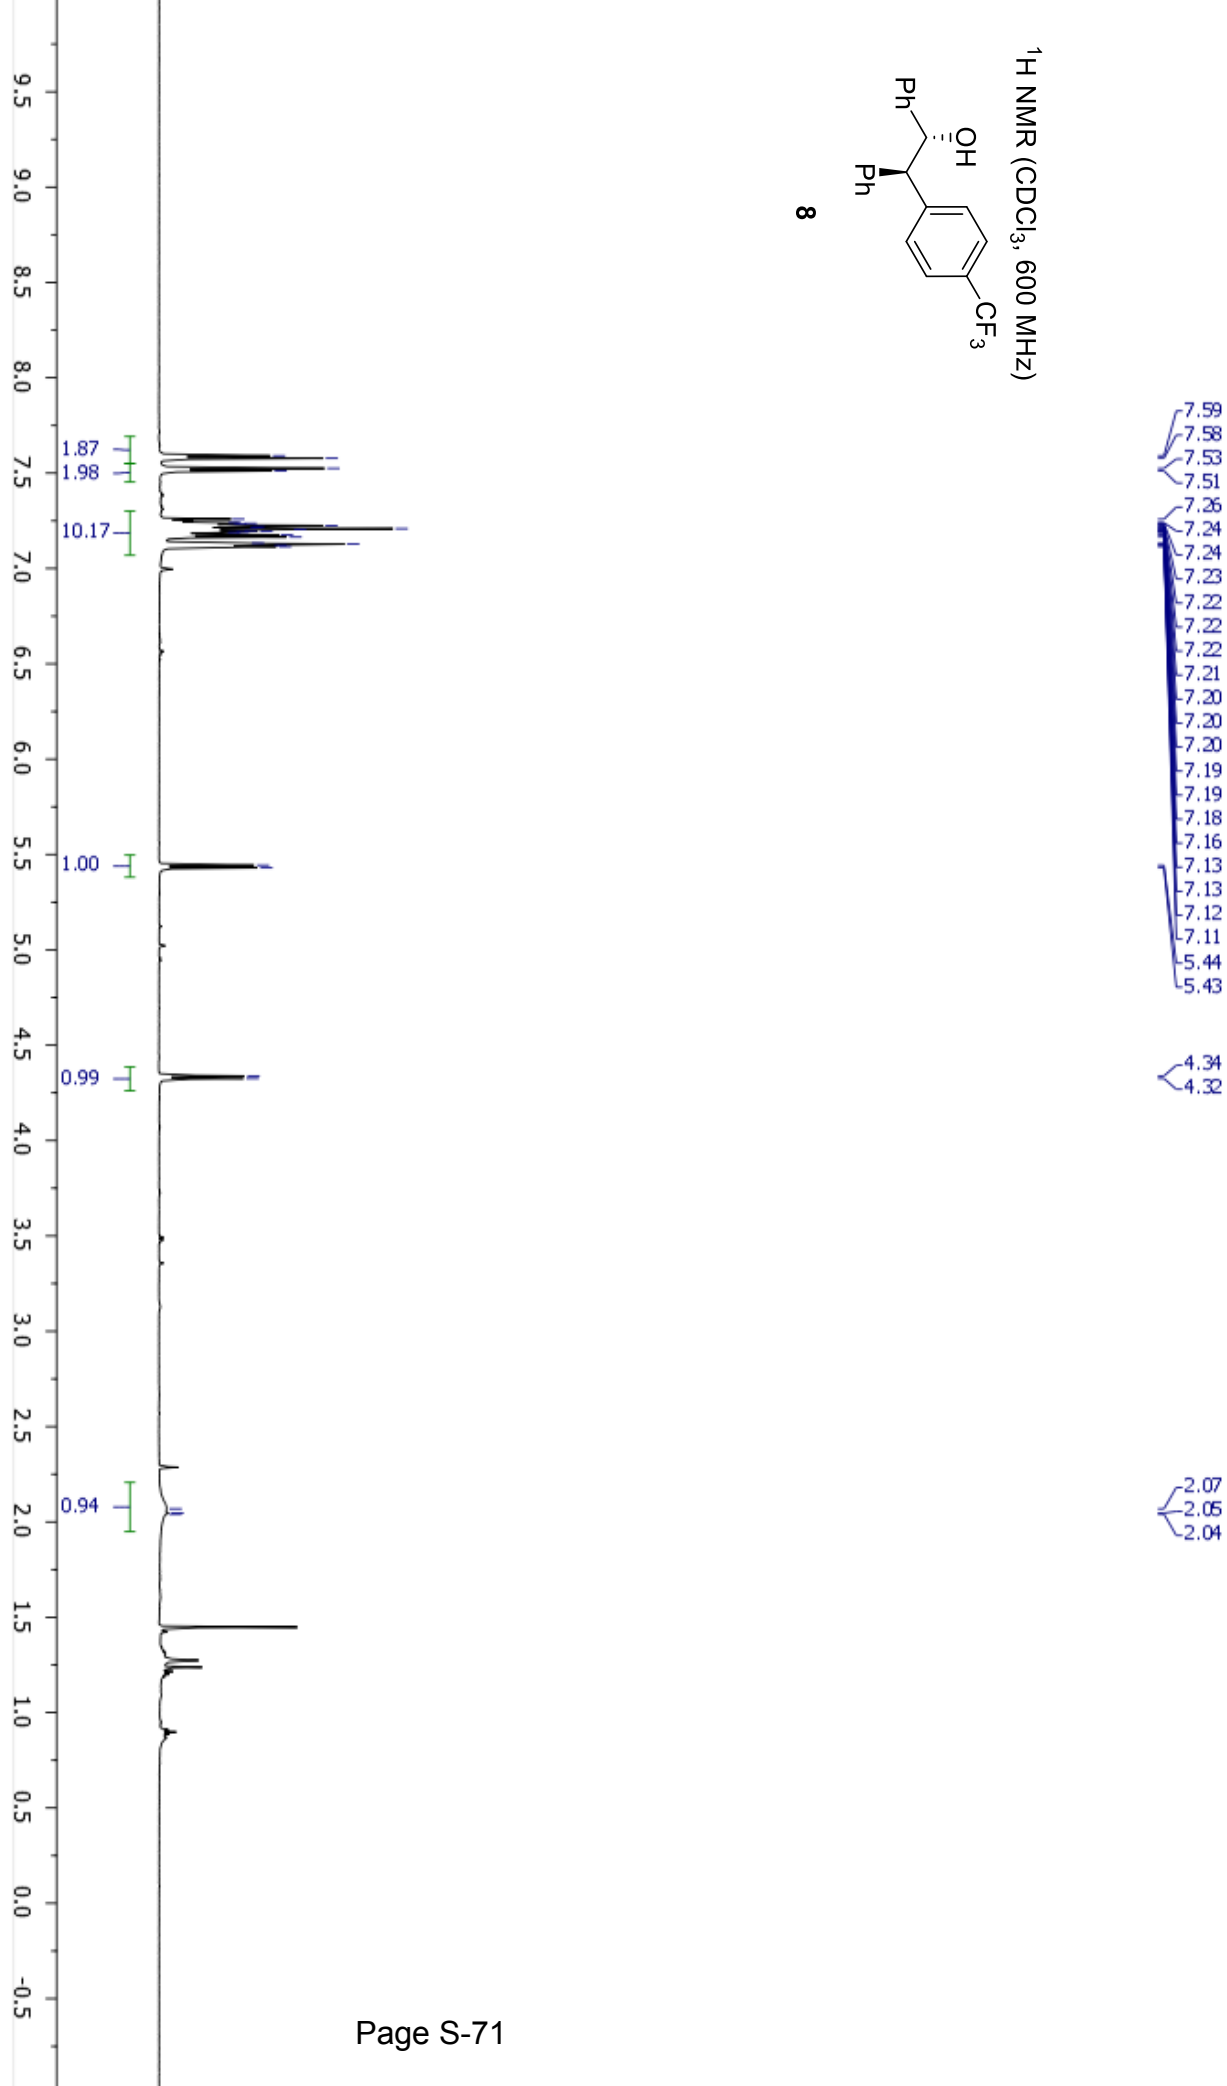

<sup>13</sup>C NMR (CDCl<sub>3</sub>, 151 MHz)

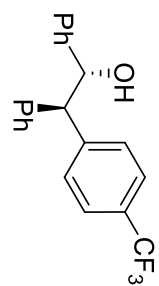

8

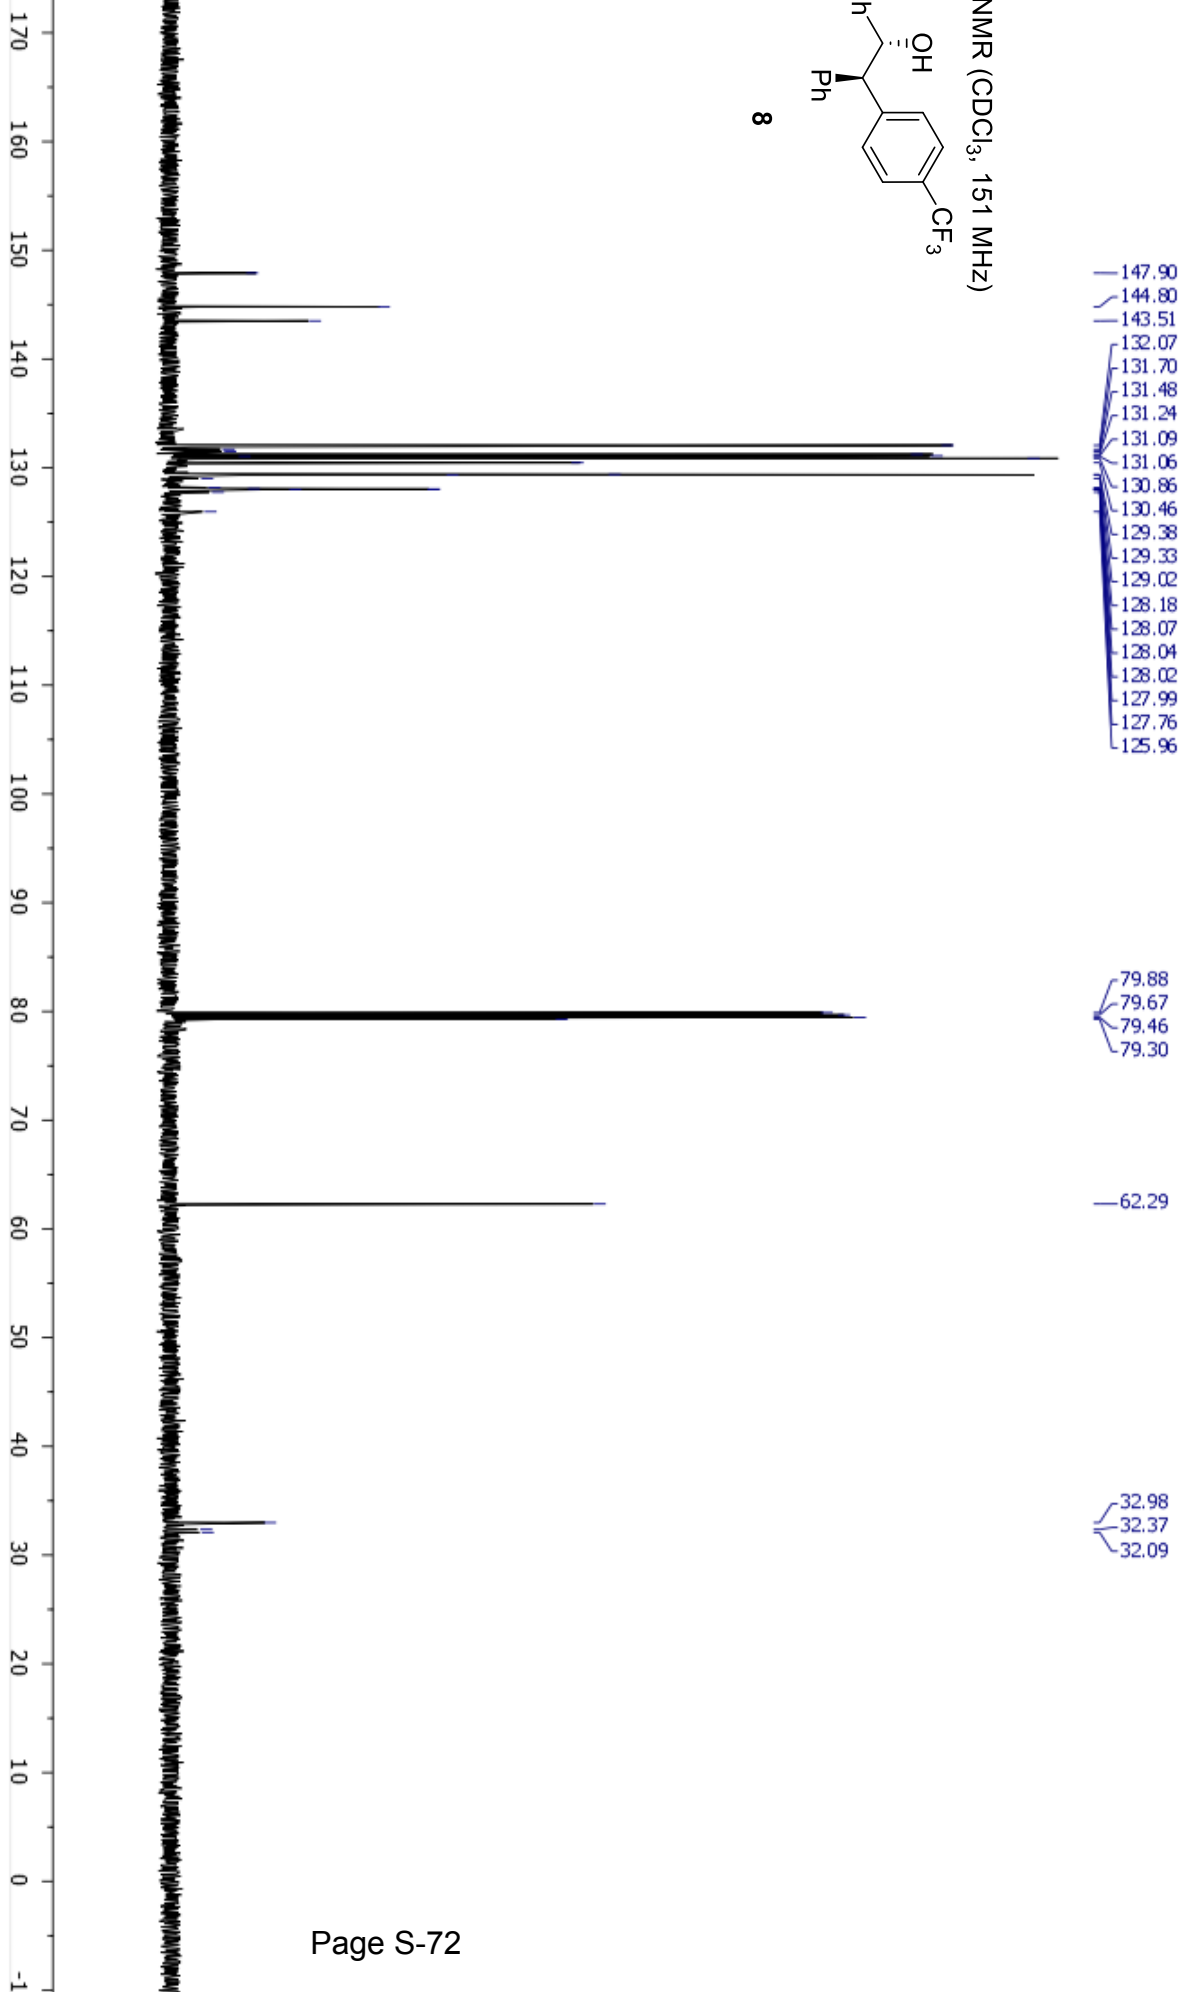



<sup>1</sup>H NMR (CDCl<sub>3</sub>, 500 MHz)

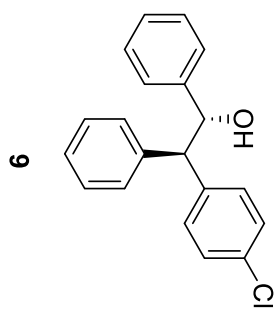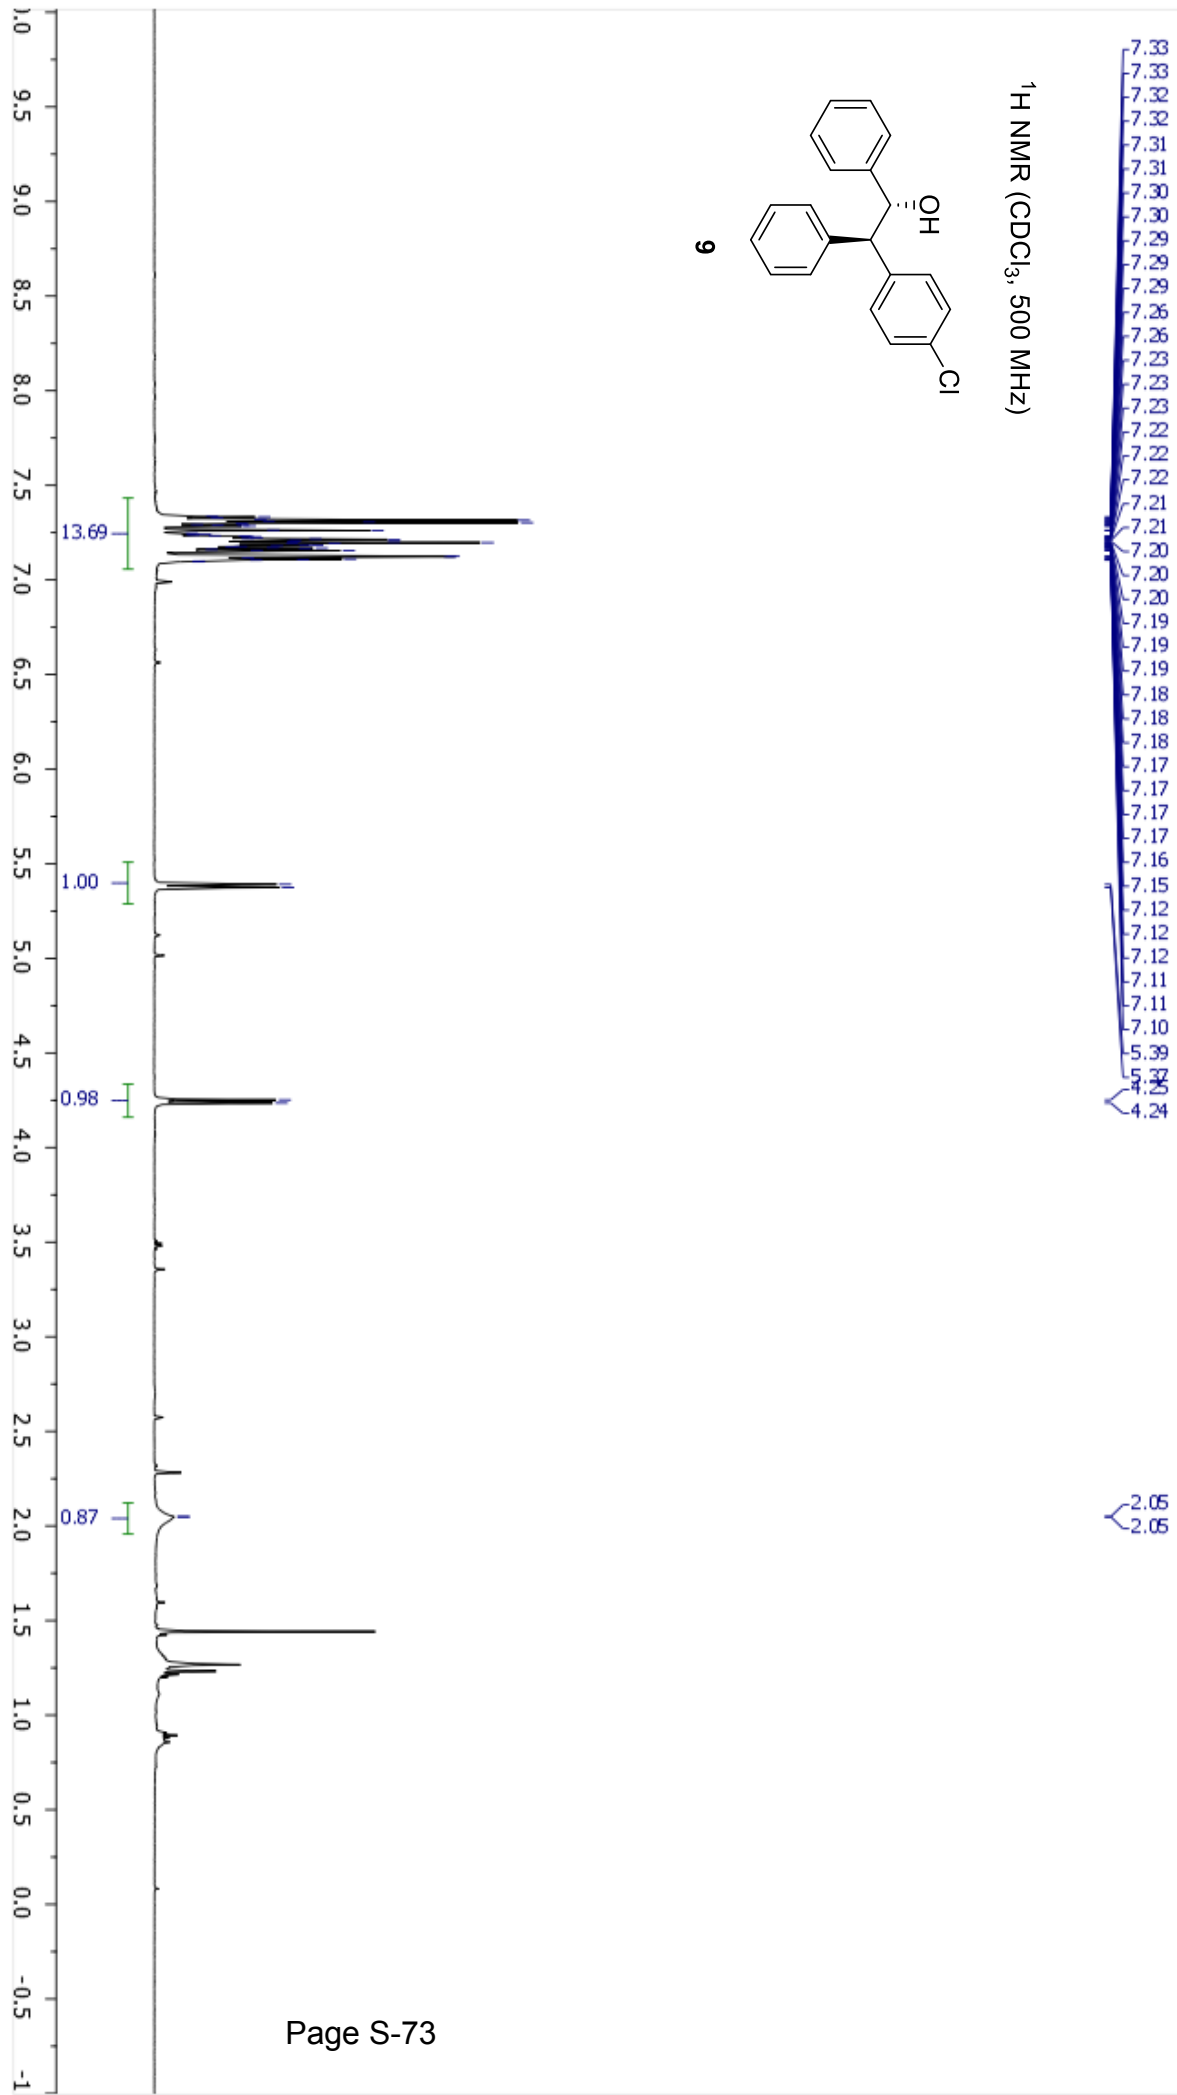

<sup>13</sup>C NMR (CDCl<sub>3</sub>, 151 MHz)

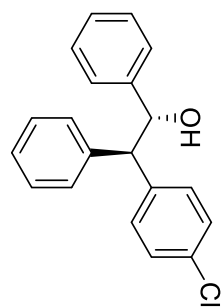

9

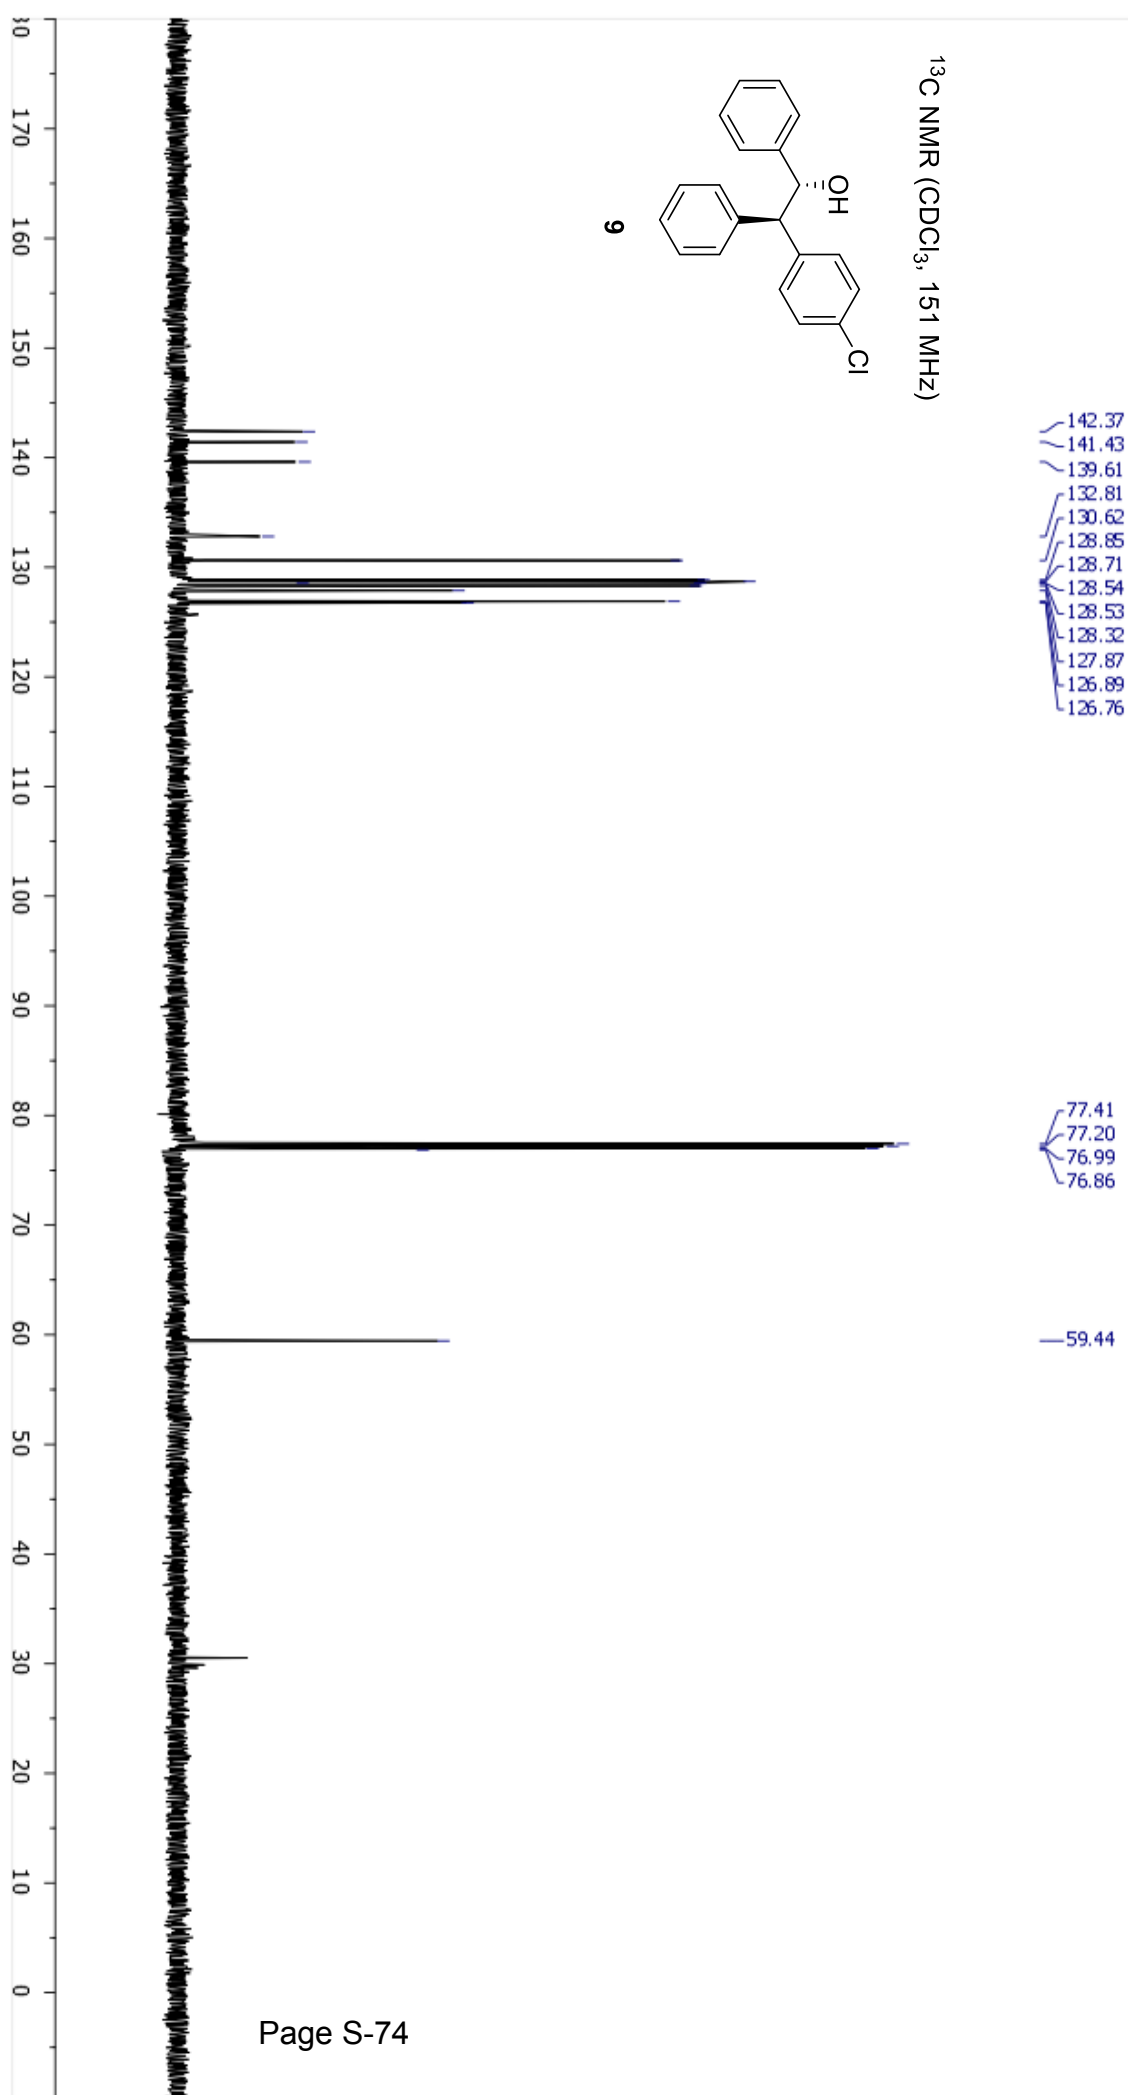

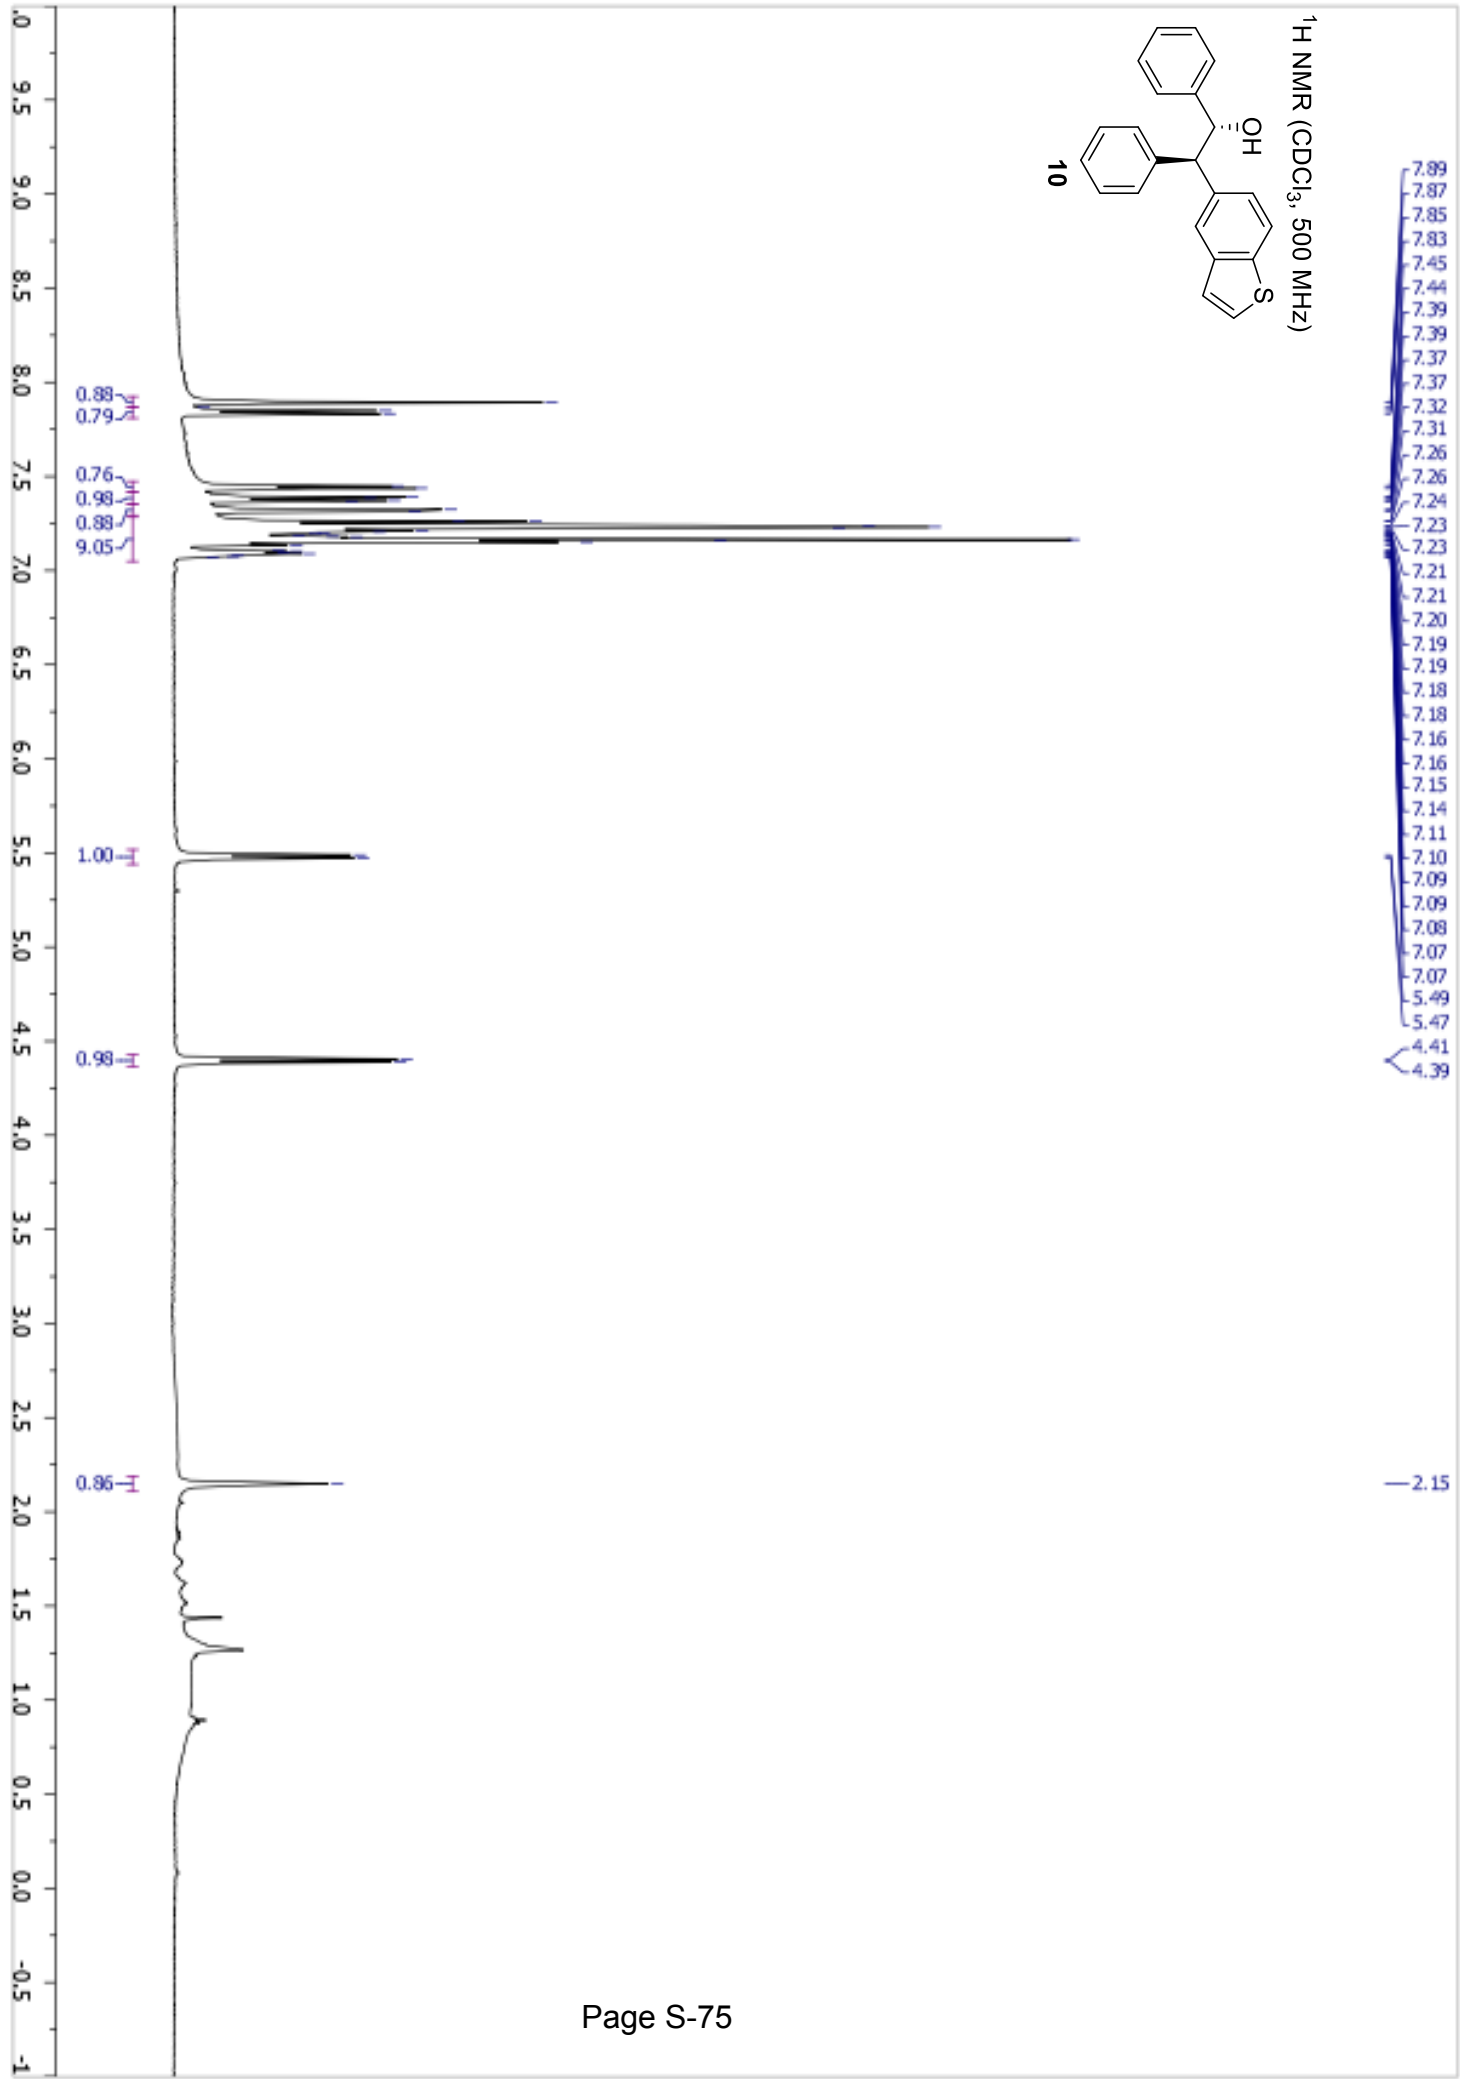

<sup>13</sup>C NMR (CDCl<sub>3</sub>, 151 MHz)

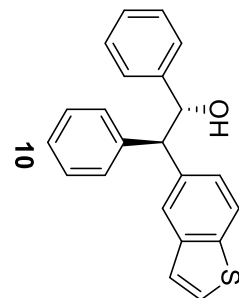

142.37  
141.84  
140.19  
138.55  
137.20  
128.74  
128.41  
128.22  
127.74  
127.06  
127.04  
126.54  
125.68  
124.01  
123.82  
122.90

77.37  
77.16  
77.02  
76.95

60.27

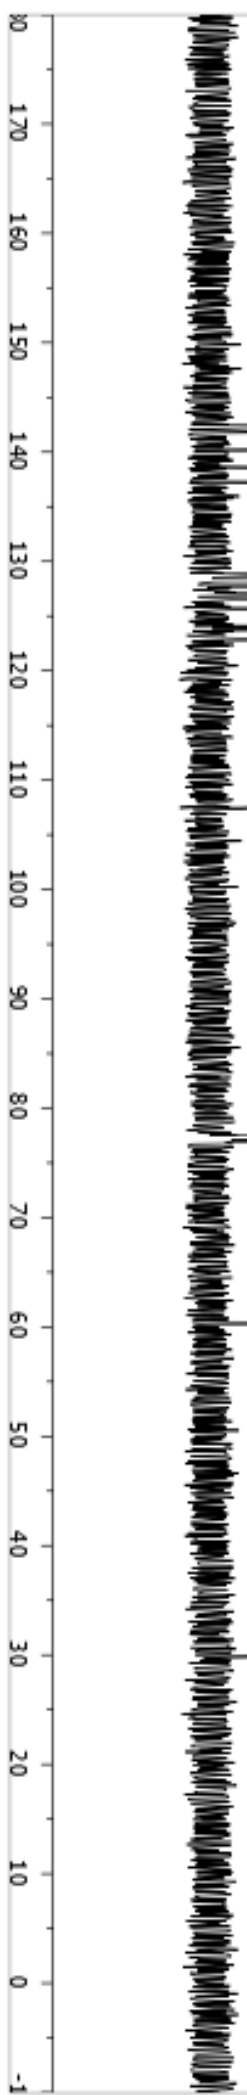

<sup>1</sup>H NMR (CDCl<sub>3</sub>, 600 MHz)

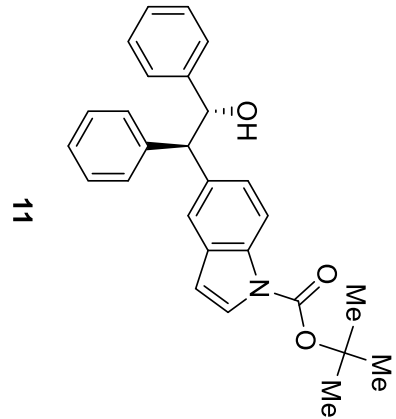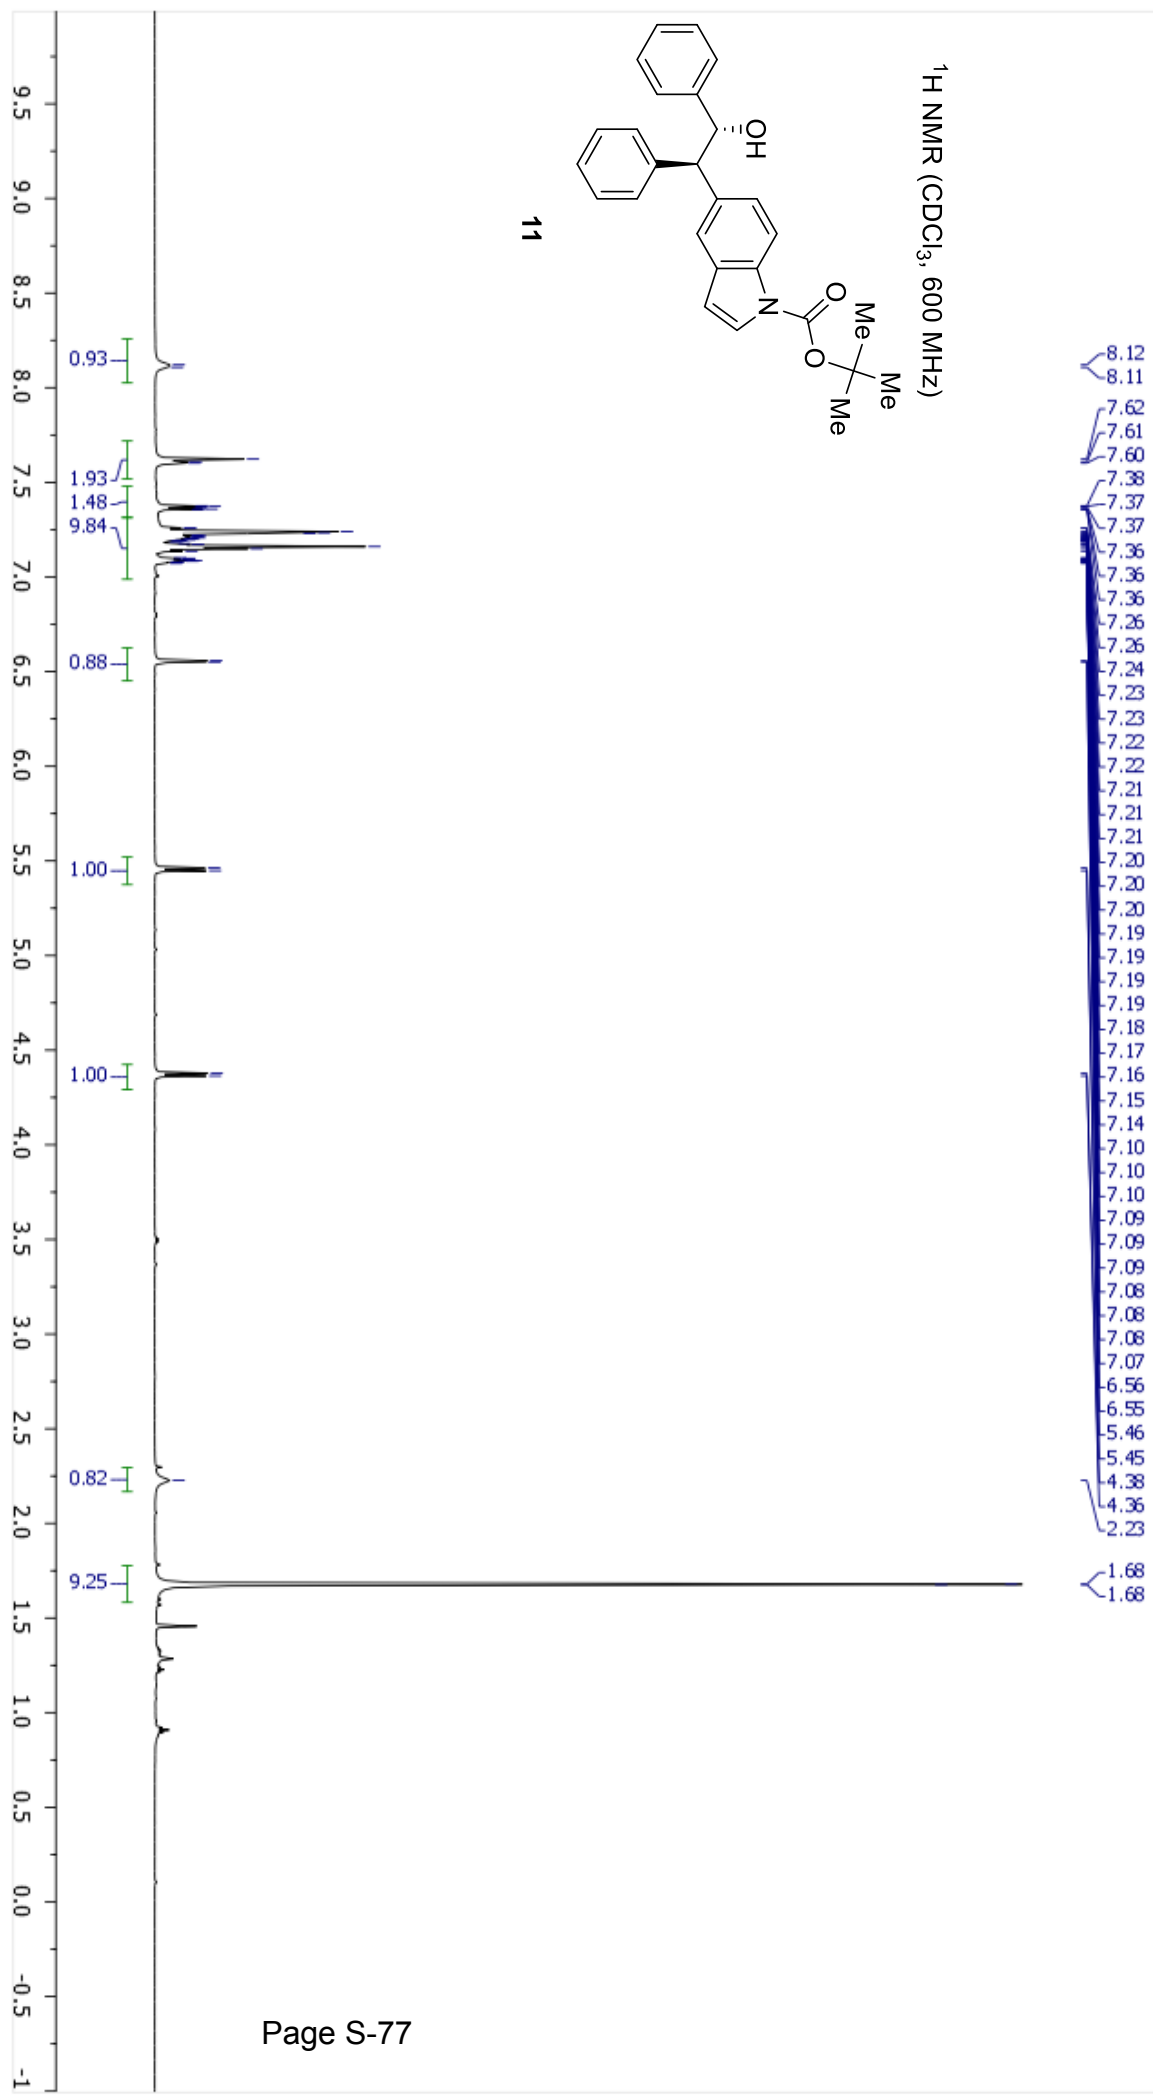

<sup>13</sup>C NMR (CDCl<sub>3</sub>, 151 MHz)

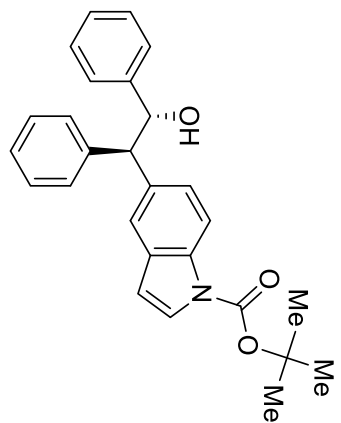

11

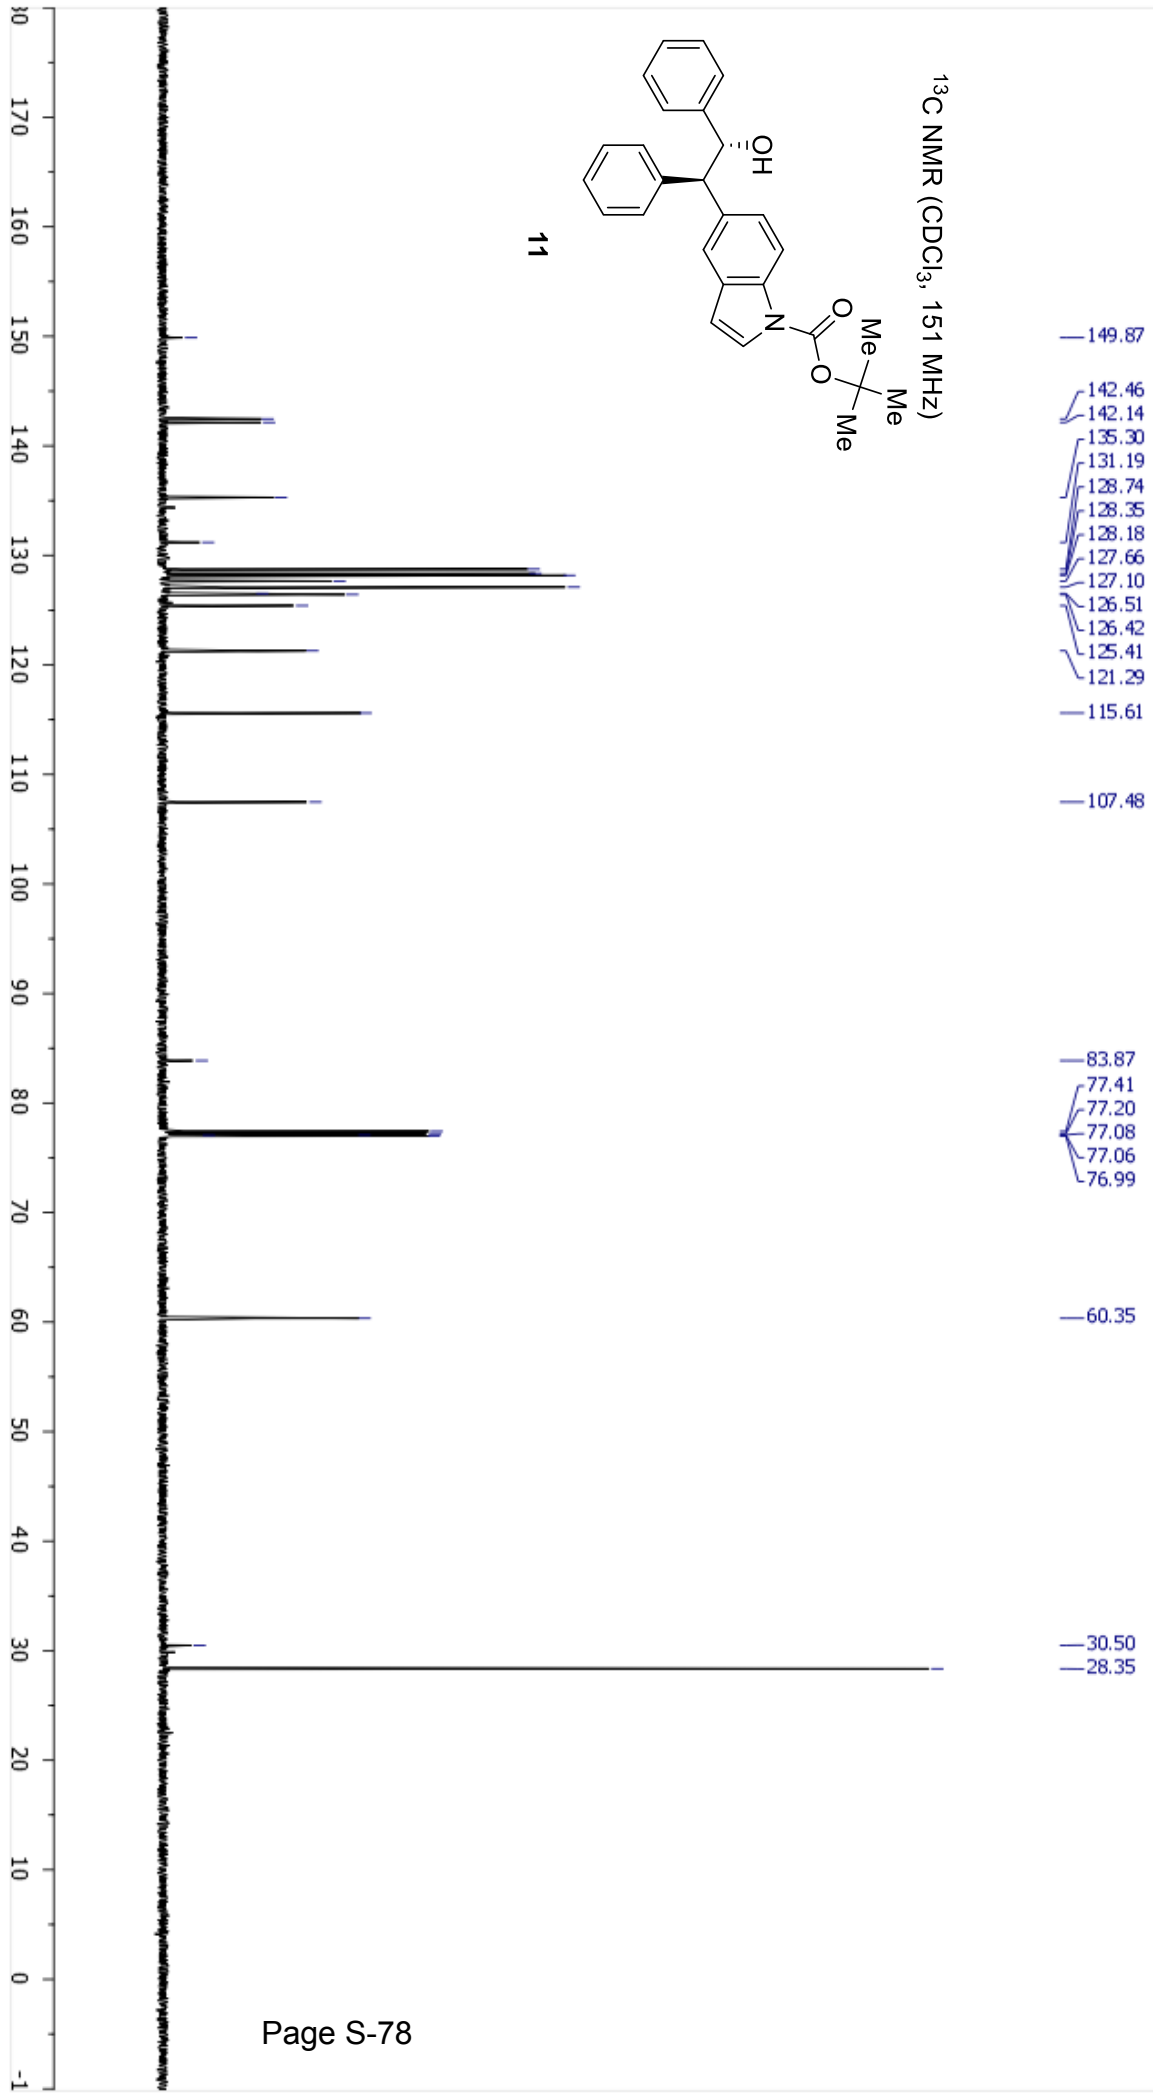

<sup>1</sup>H NMR (CDCl<sub>3</sub>, 600 MHz)

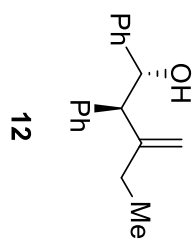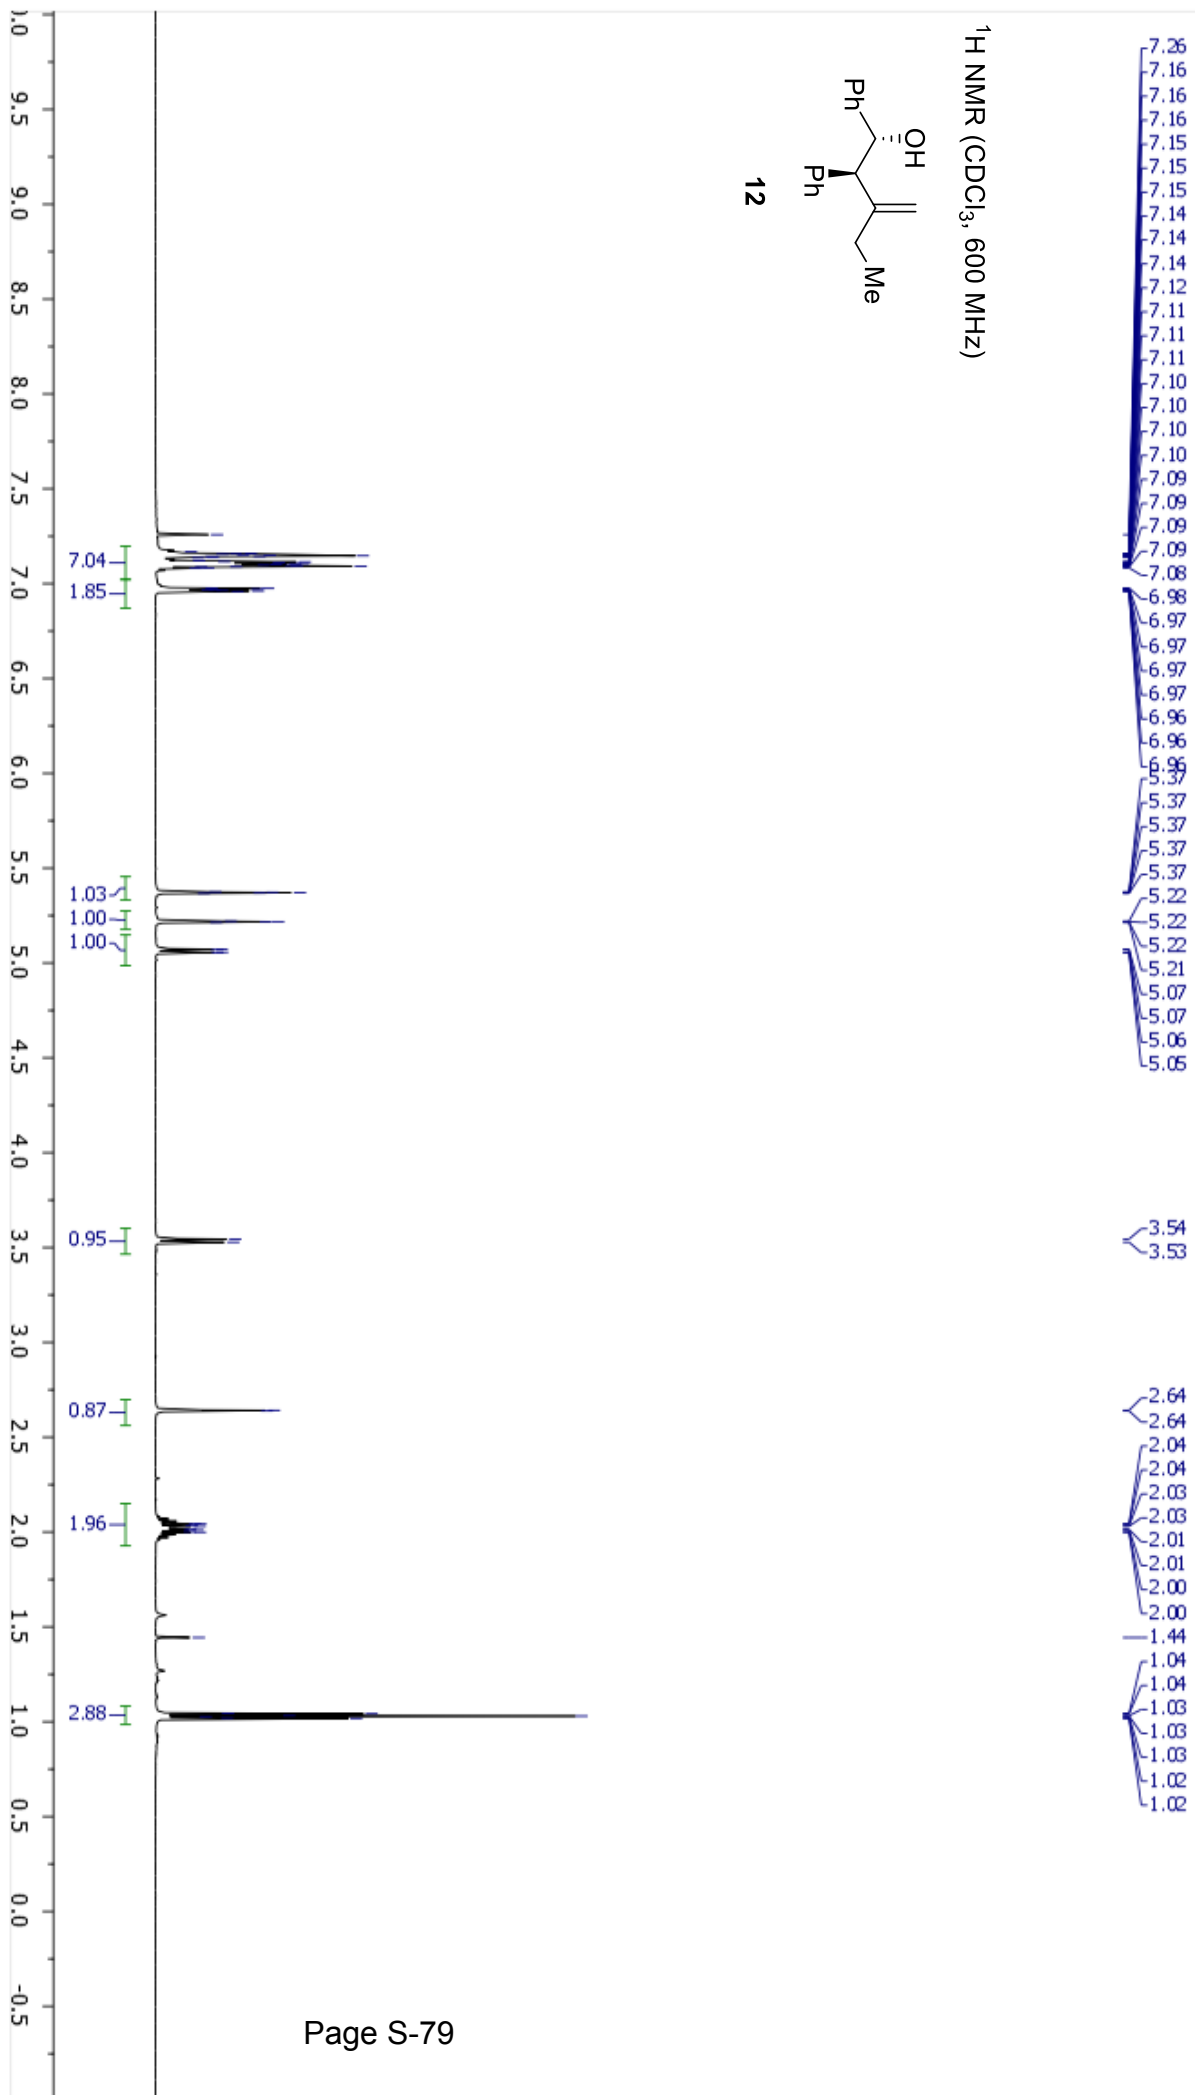

$^{13}\text{C}$  NMR ( $\text{CDCl}_3$ , 151 MHz)

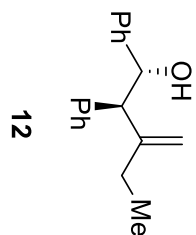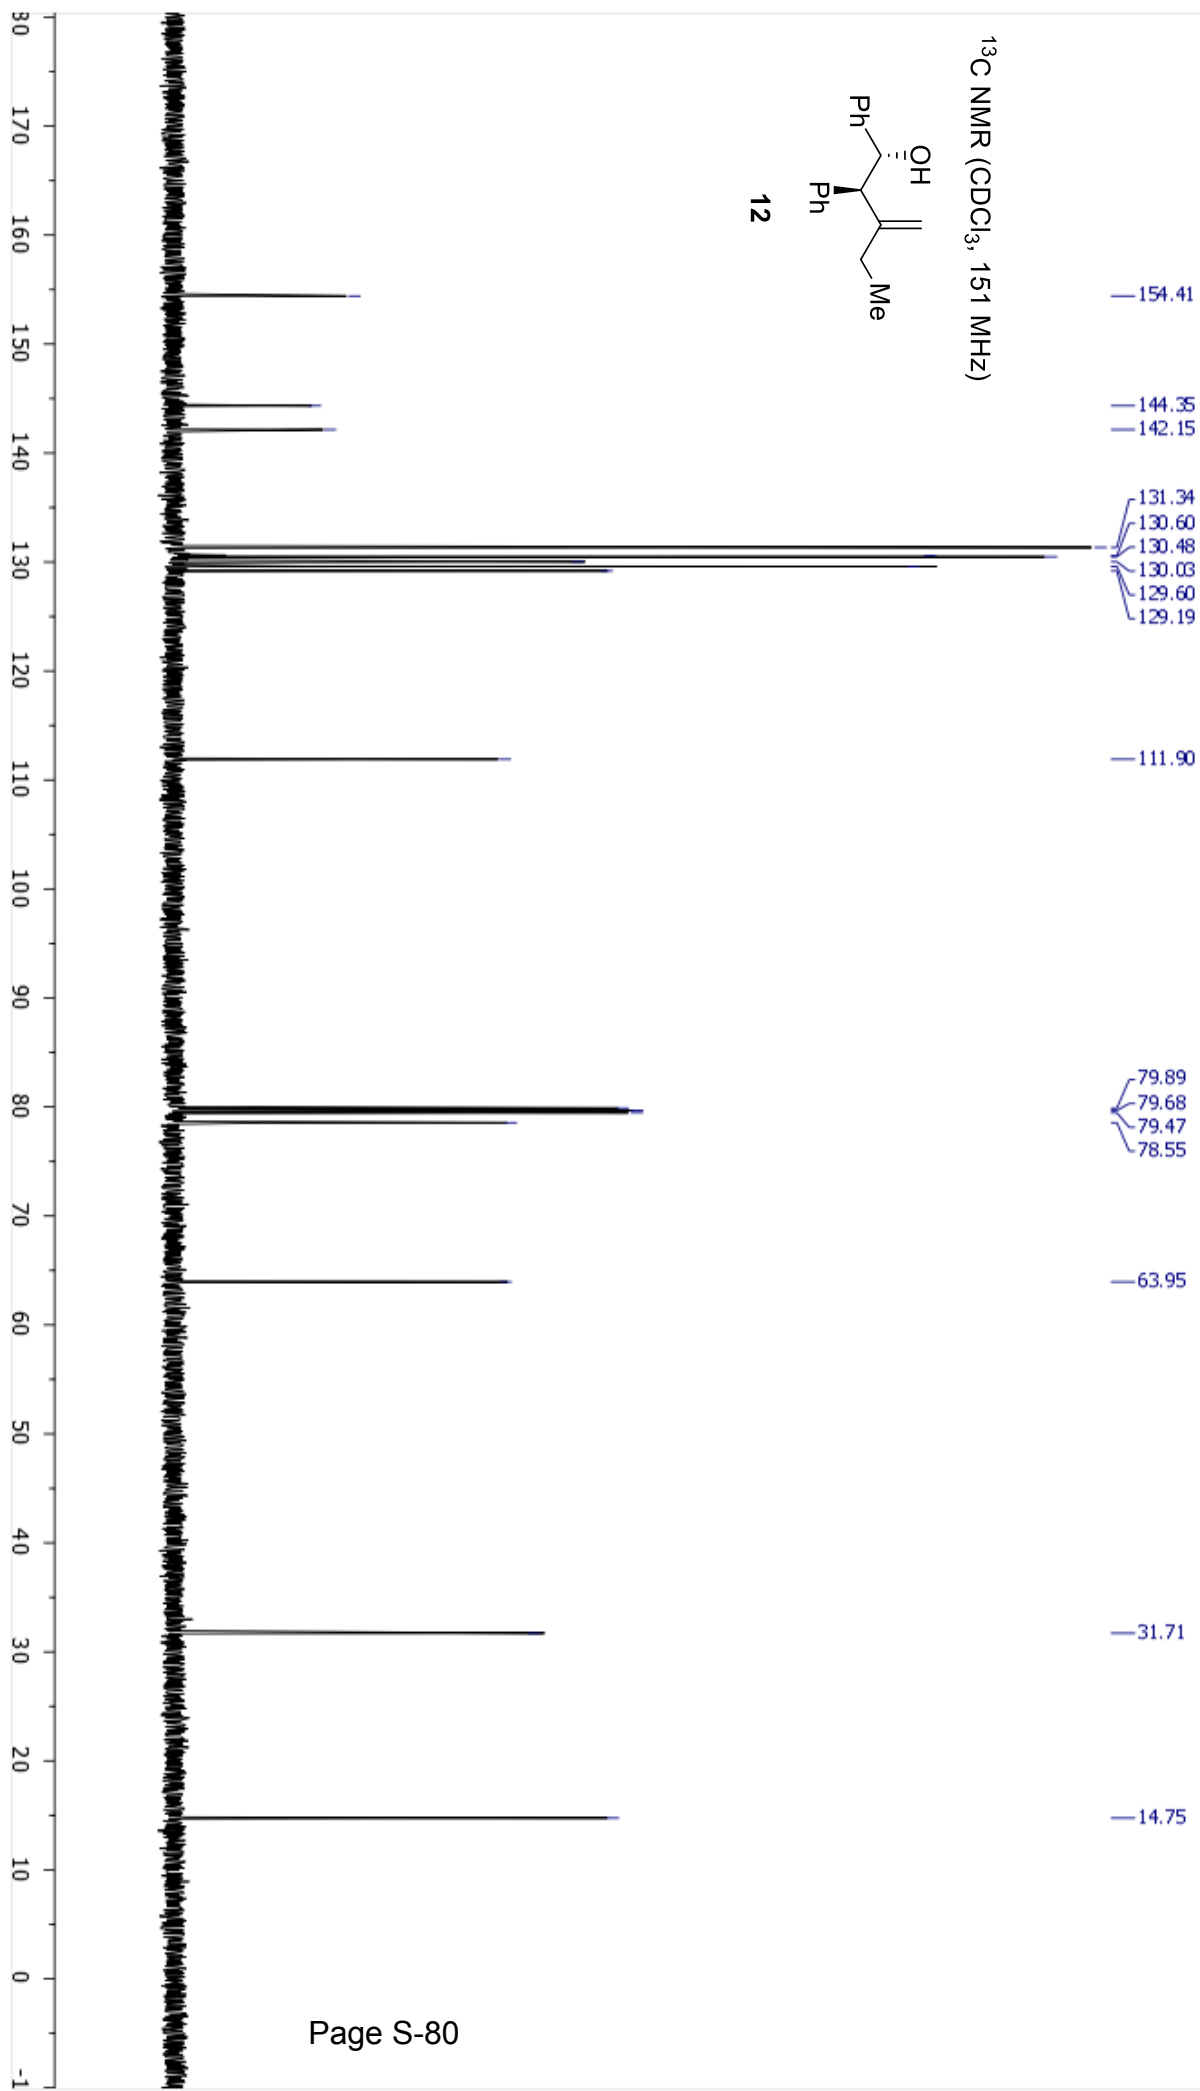



$^1\text{H}$  NMR ( $\text{CDCl}_3$ , 500 MHz)

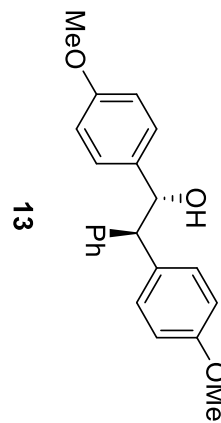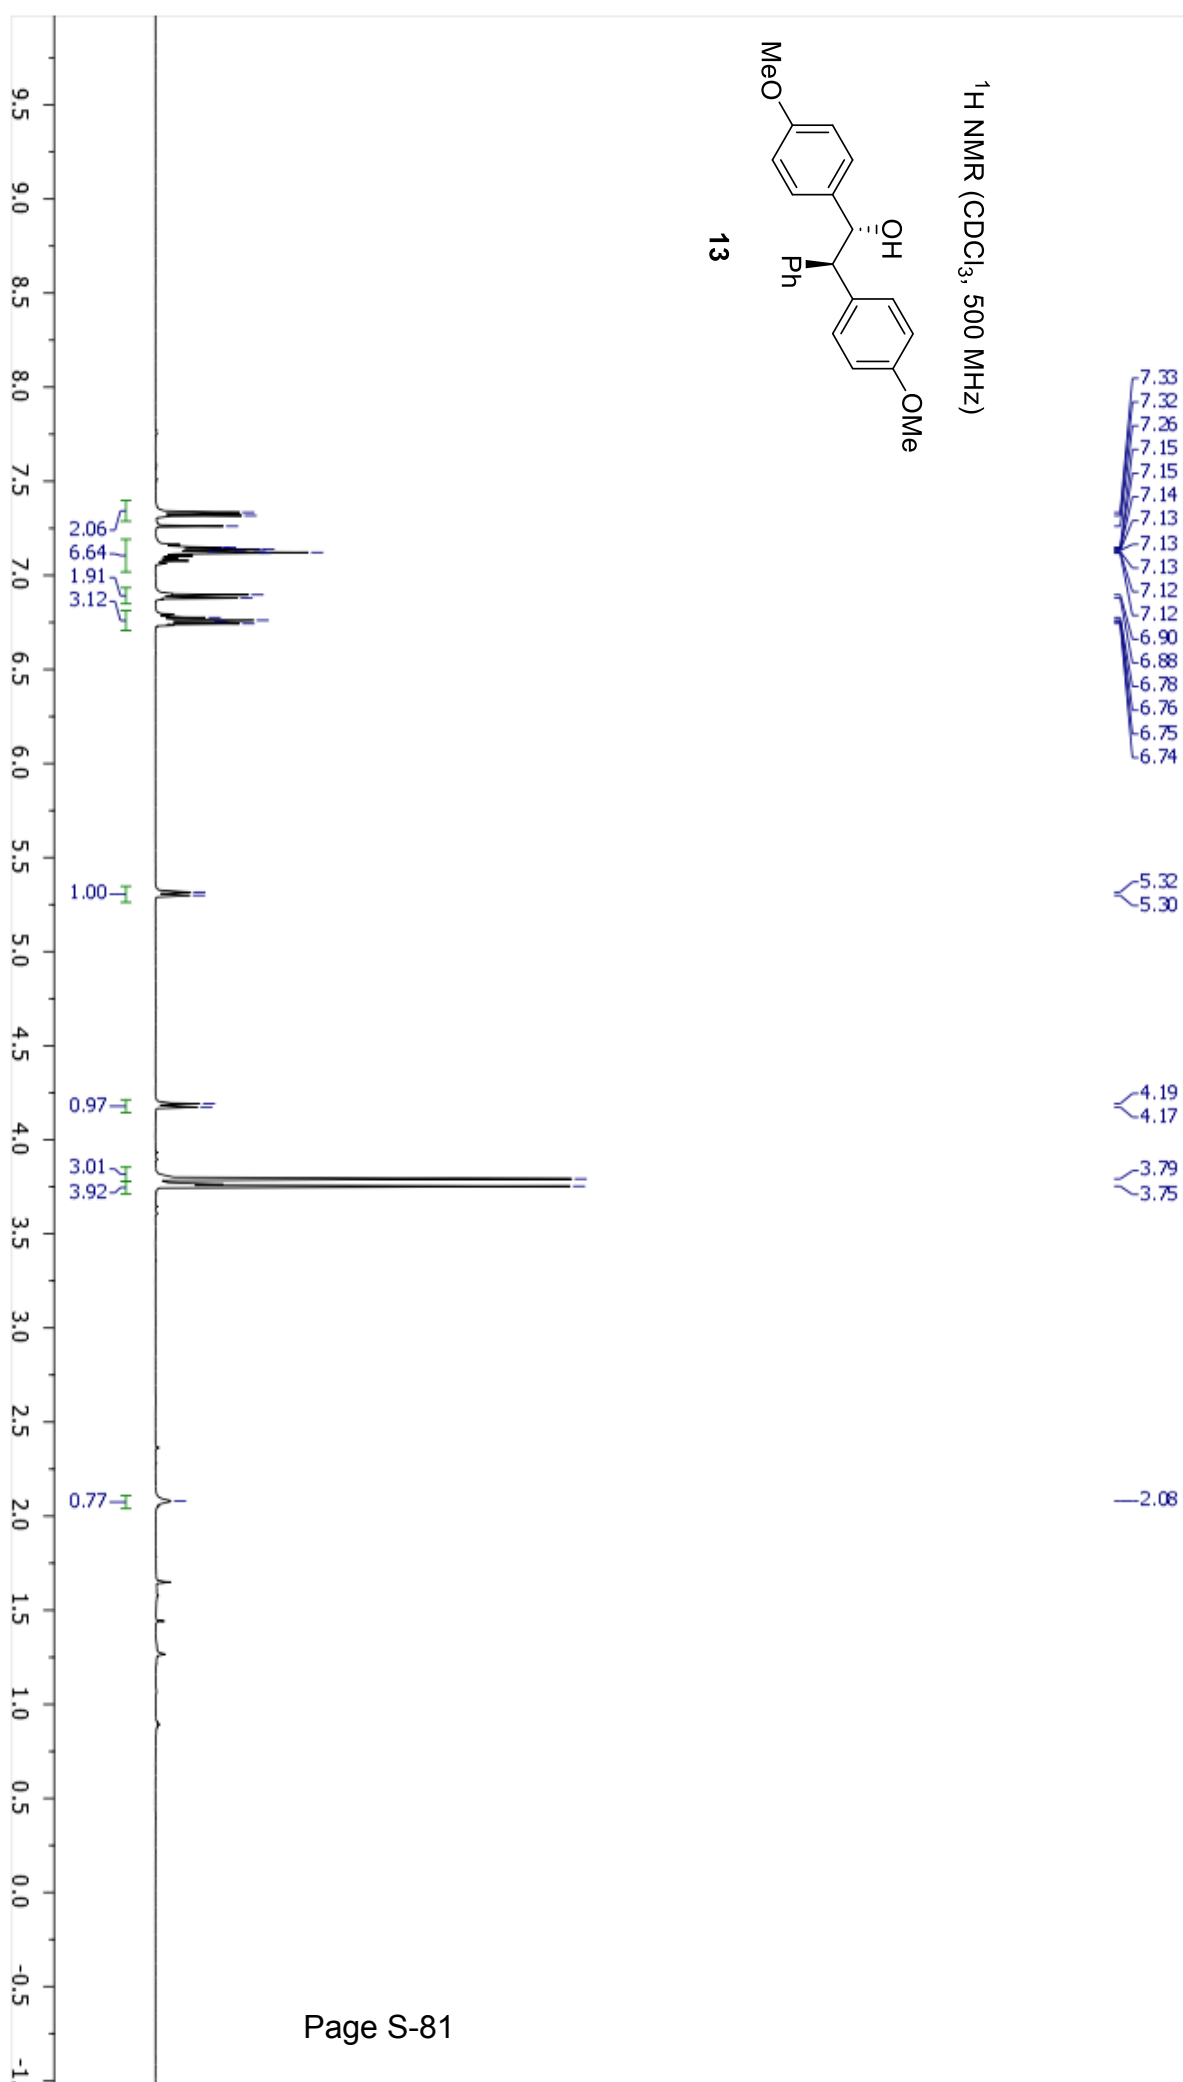

$^{13}\text{C}$  NMR ( $\text{CDCl}_3$ , 126 MHz)

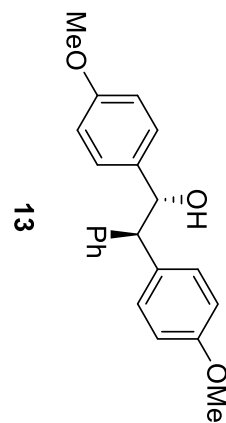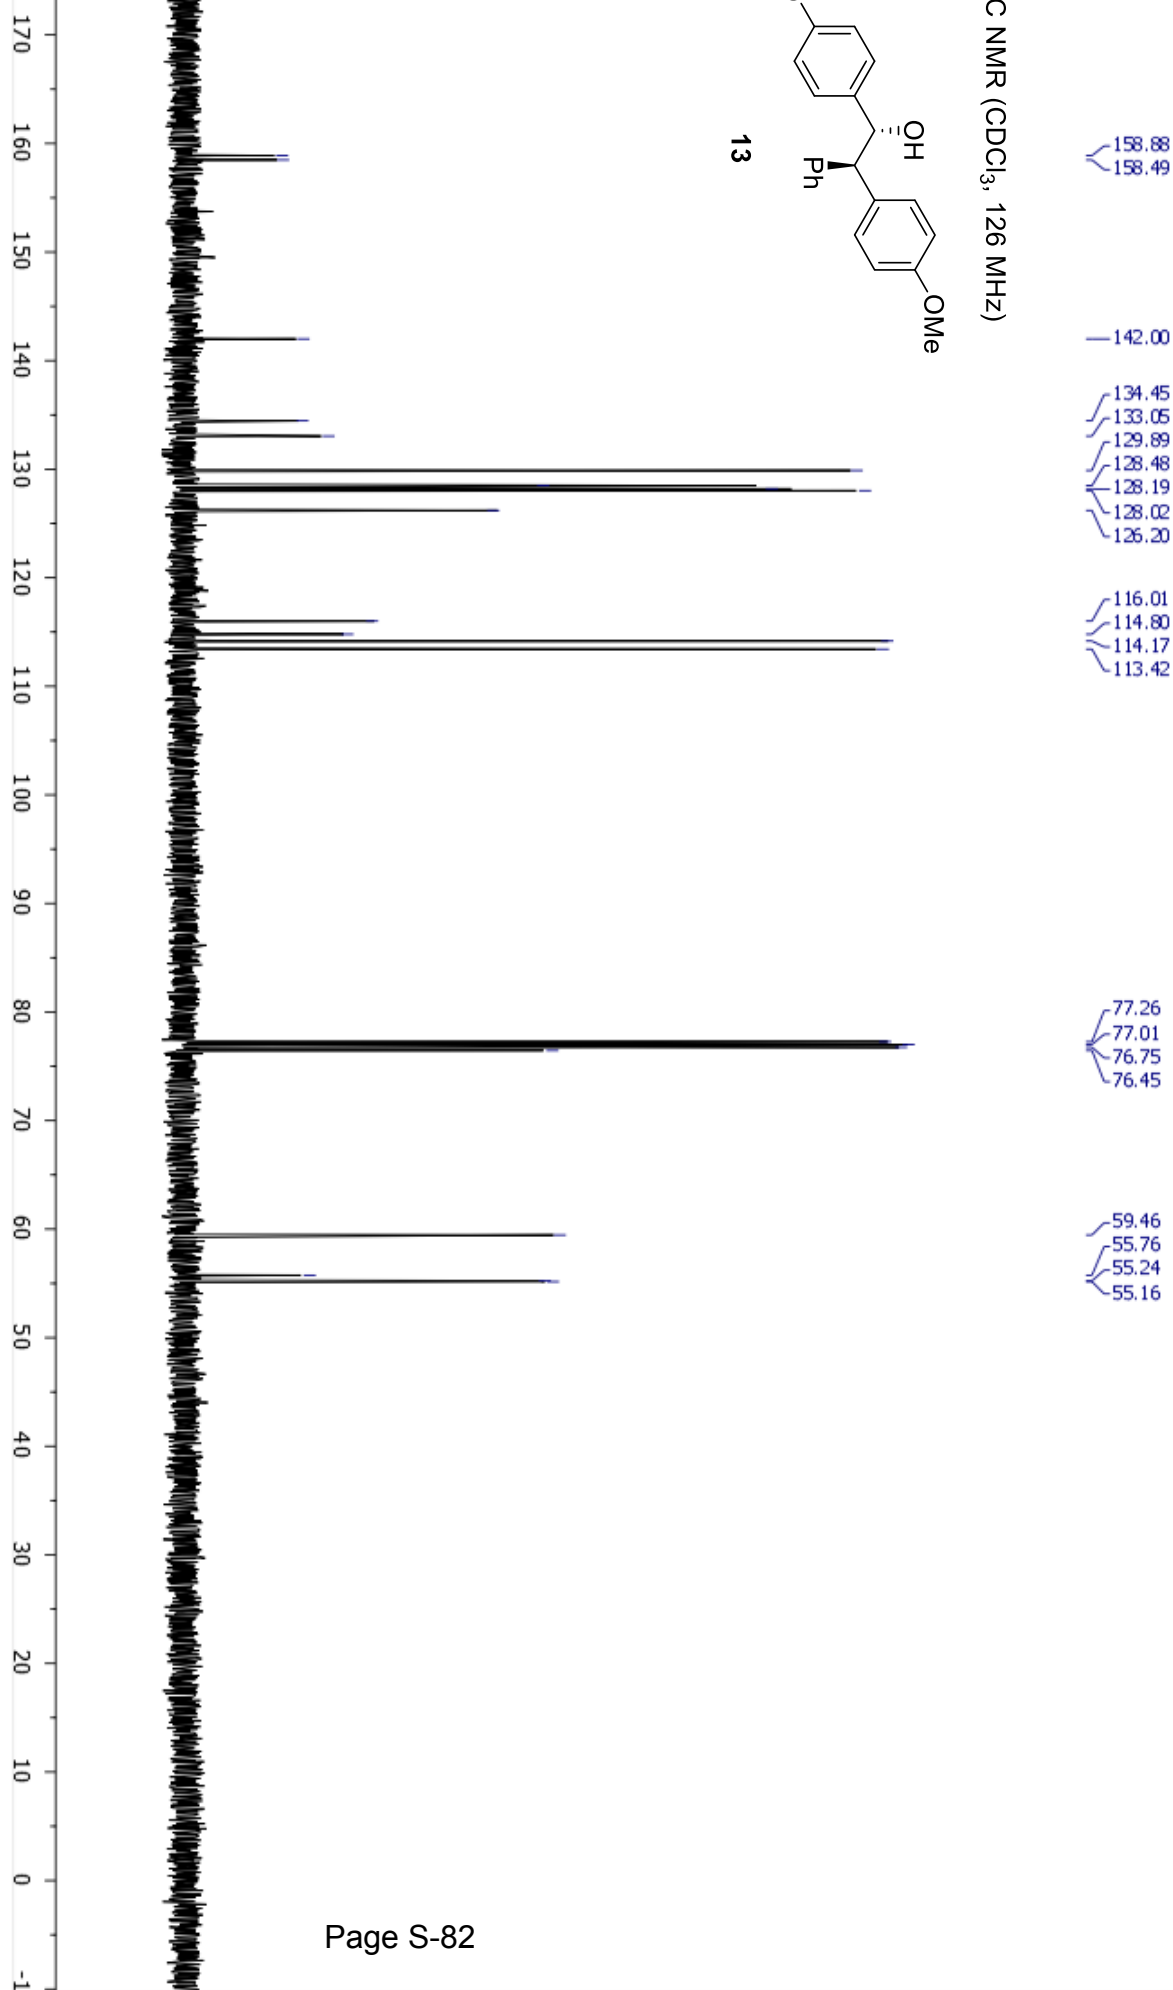

<sup>1</sup>H NMR (CDCl<sub>3</sub>, 500 MHz)

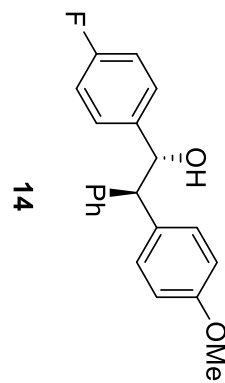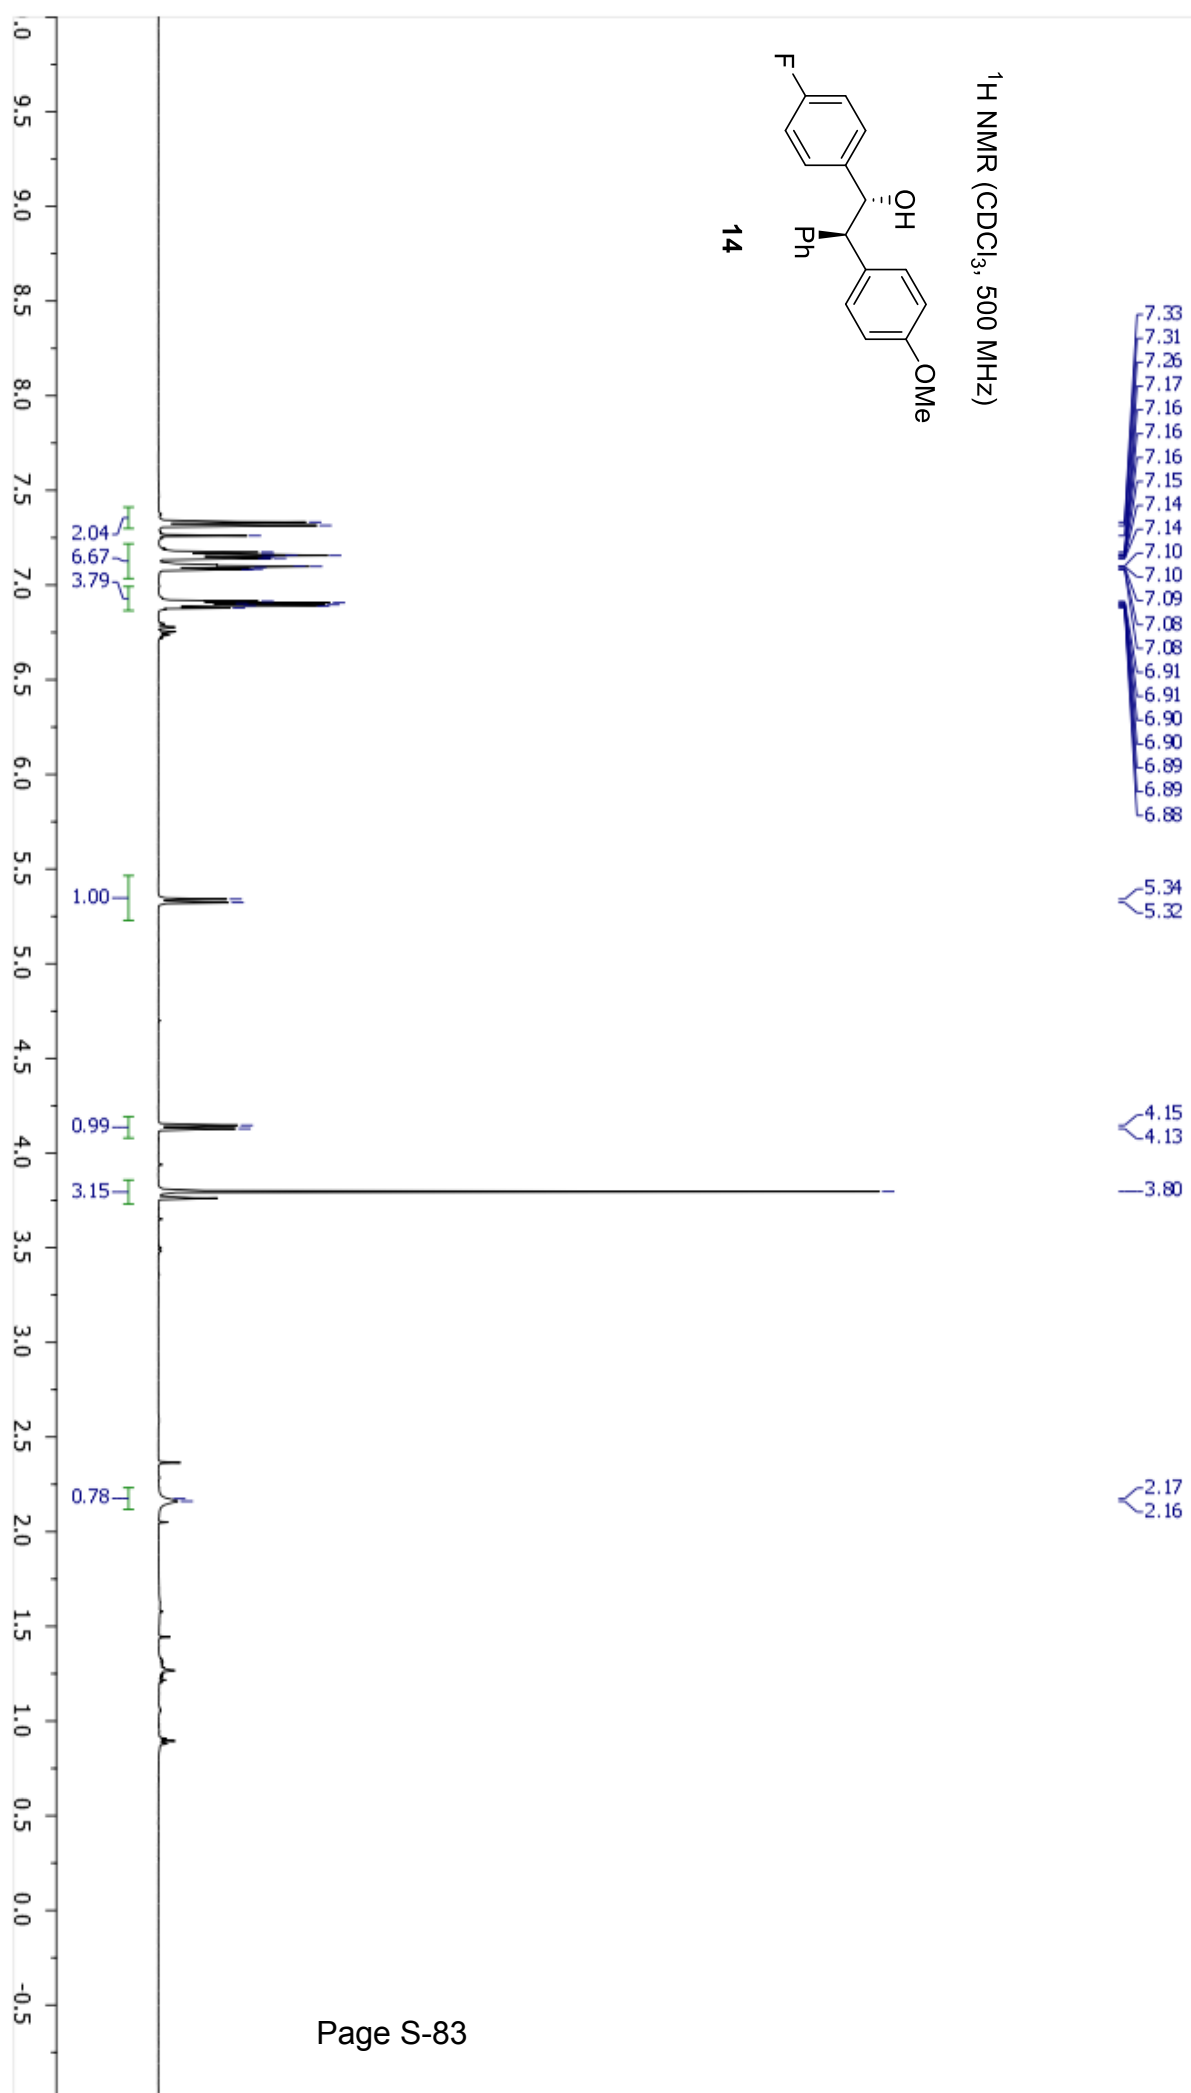

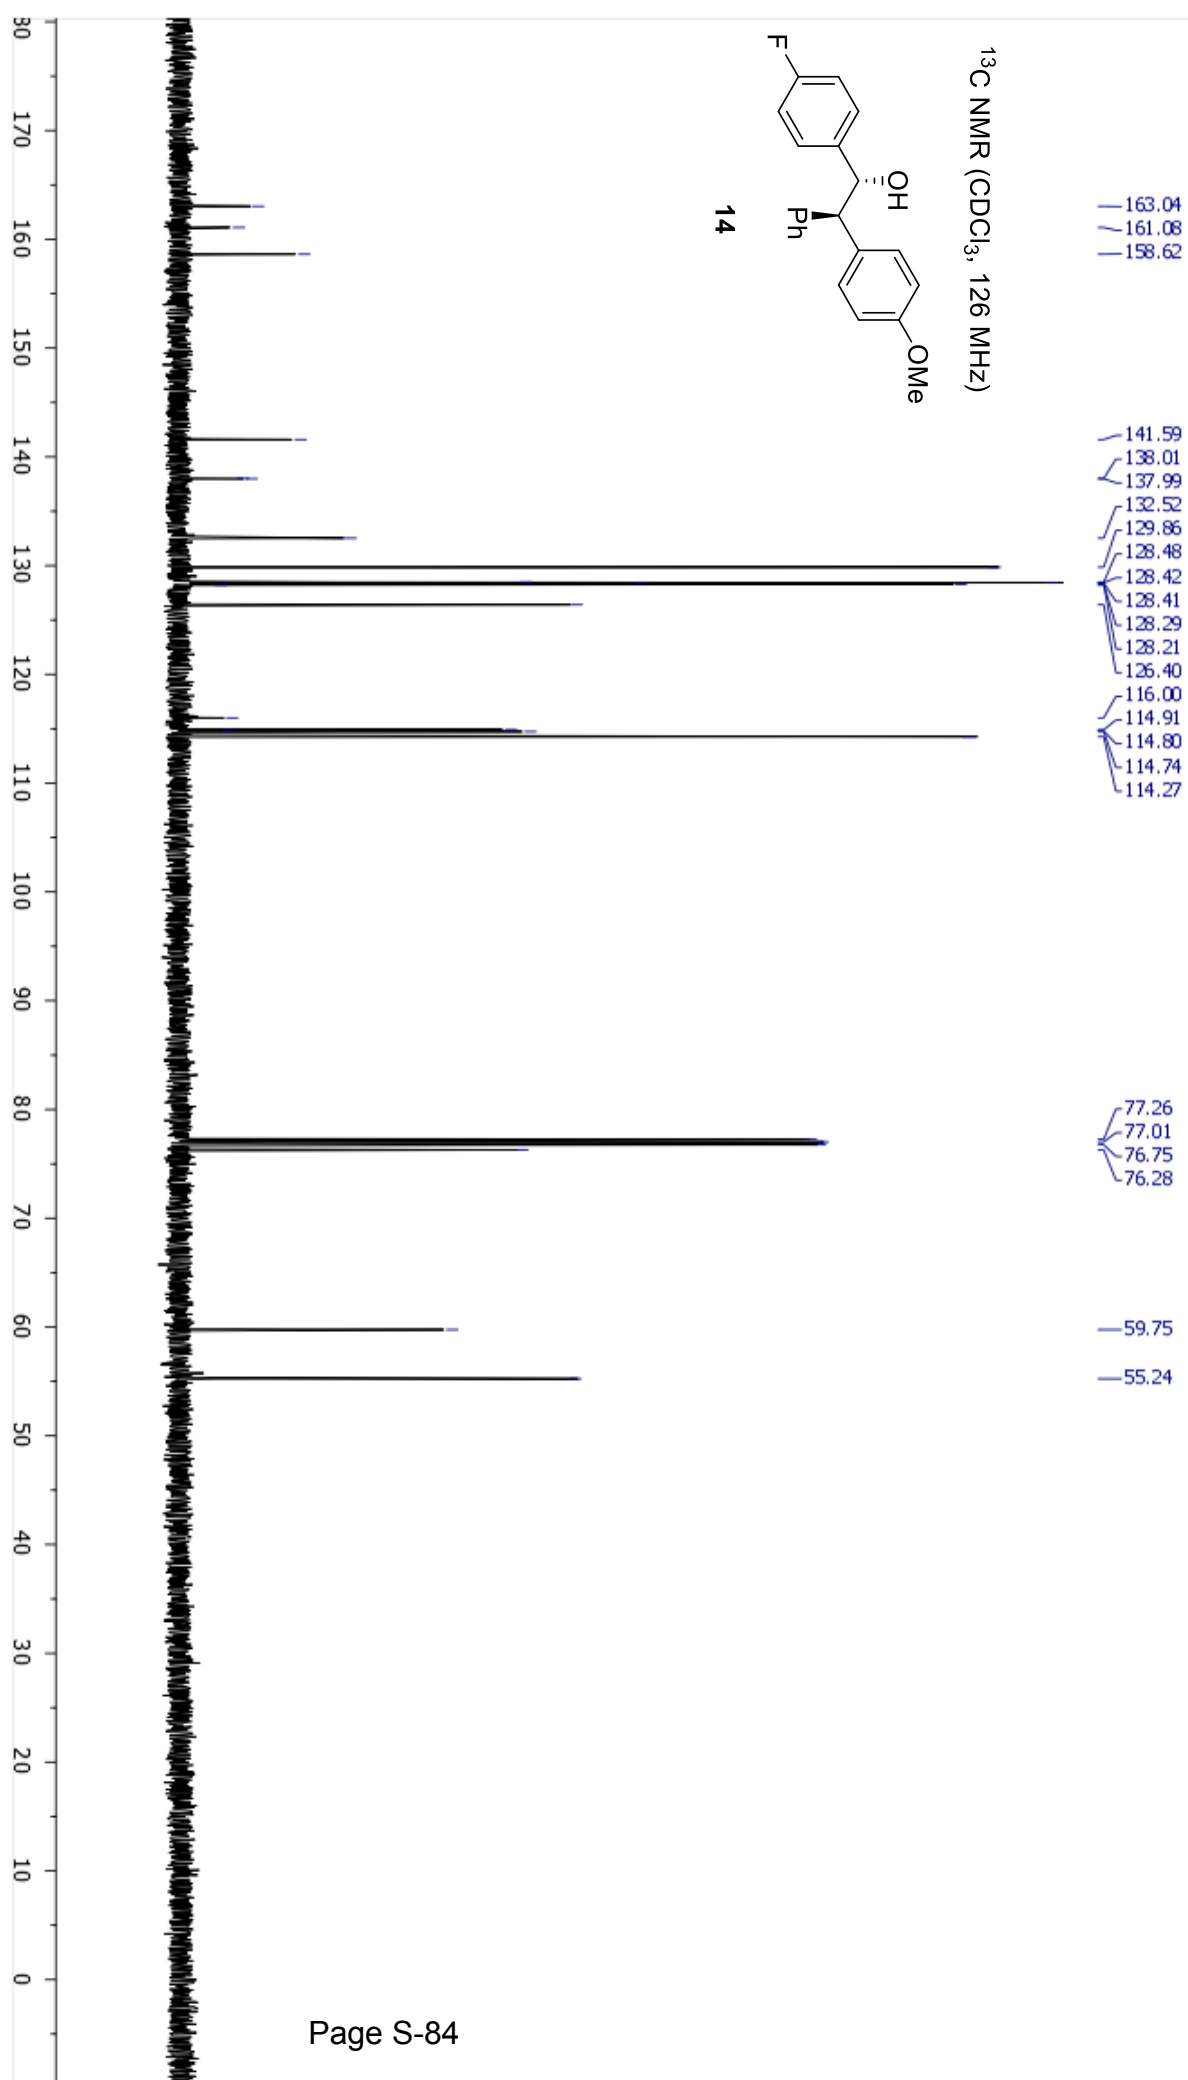

<sup>1</sup>H NMR (CDCl<sub>3</sub>, 500 MHz)

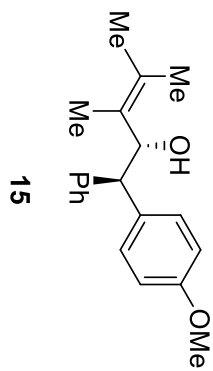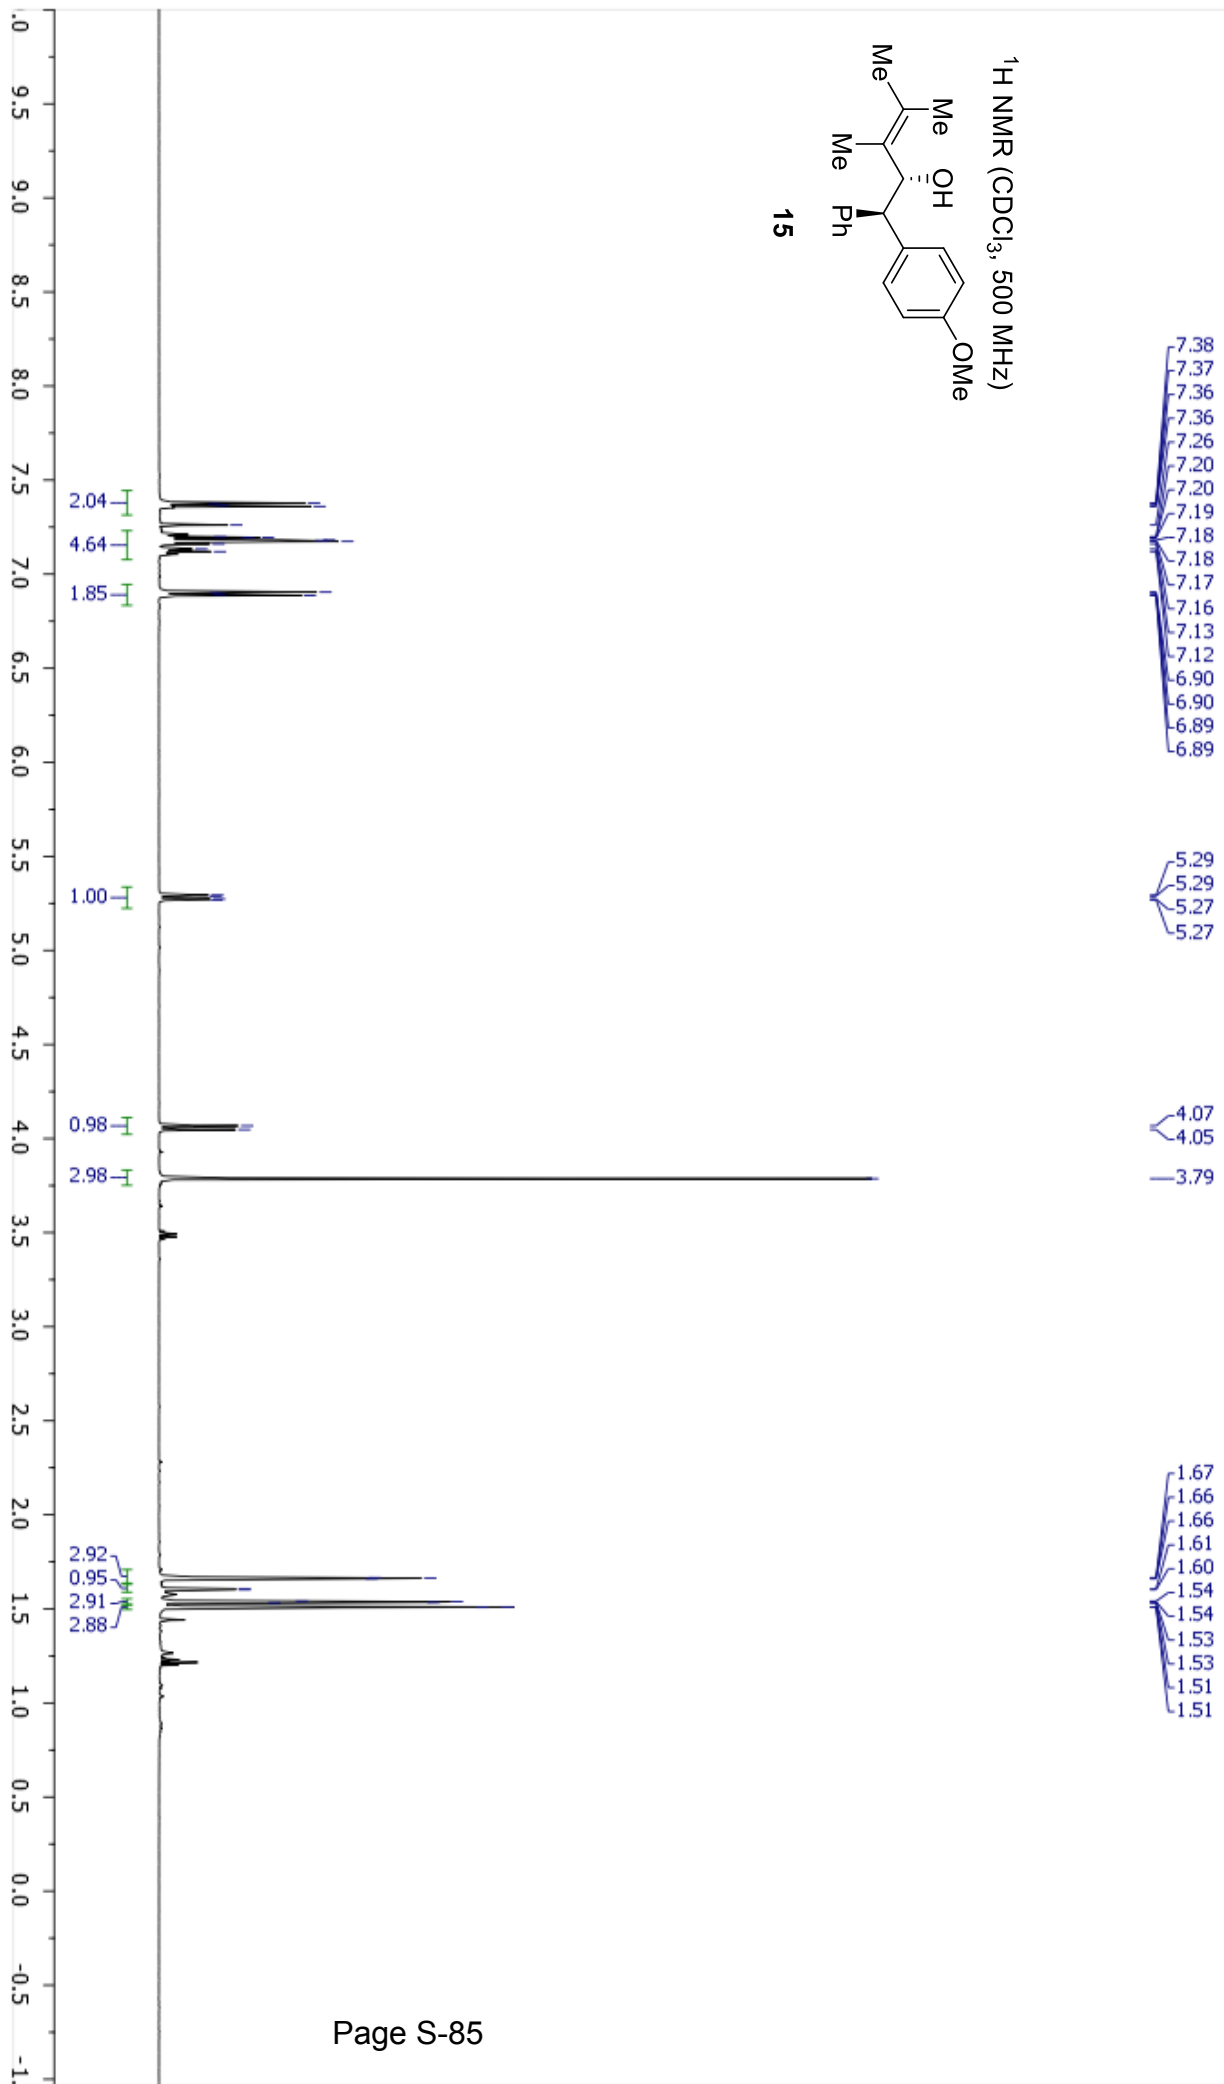

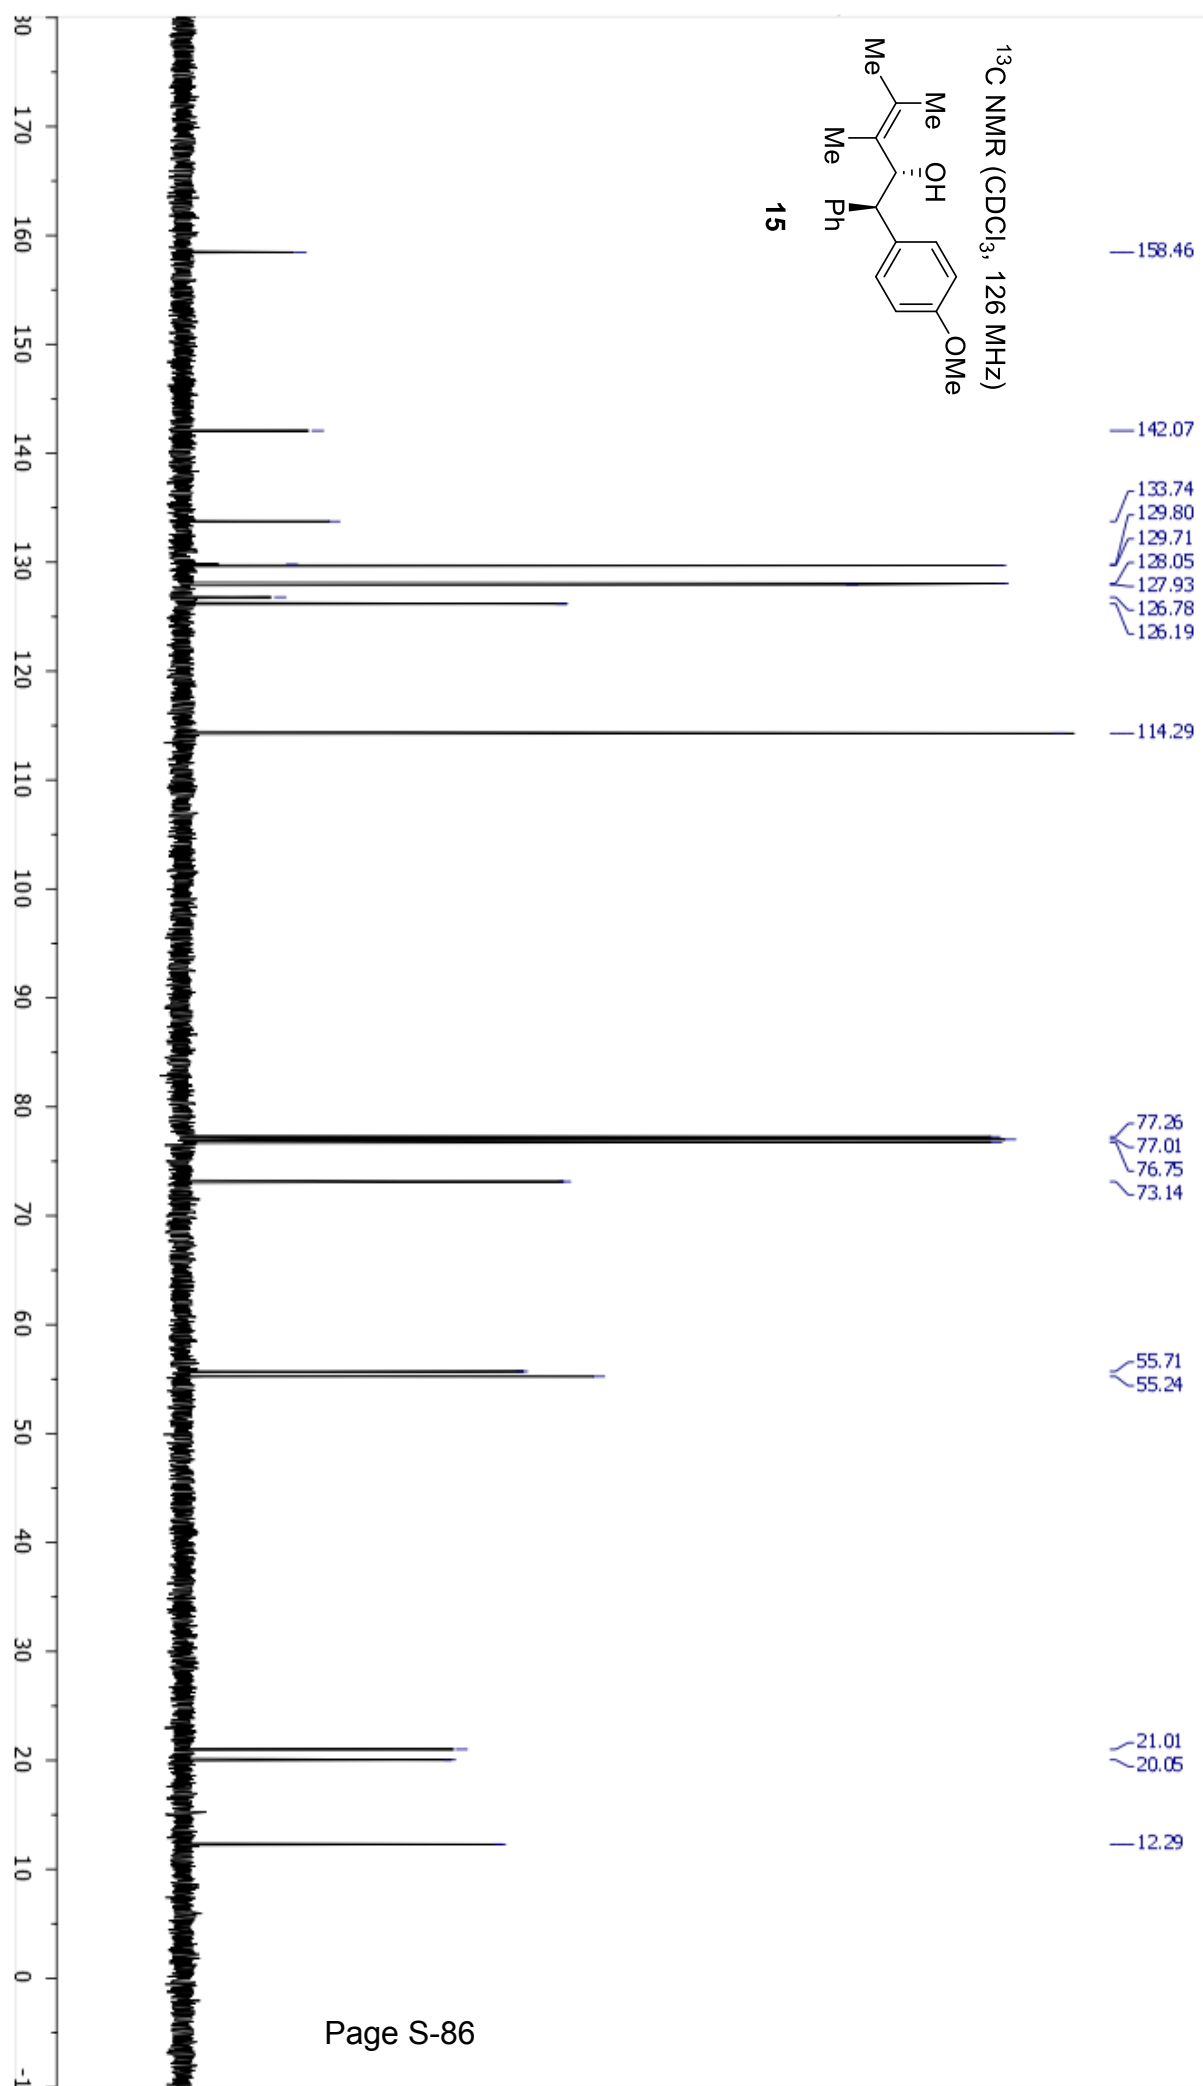

<sup>1</sup>H NMR (CDCl<sub>3</sub>, 500 MHz)

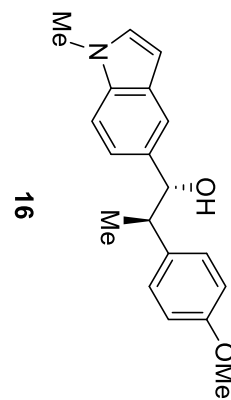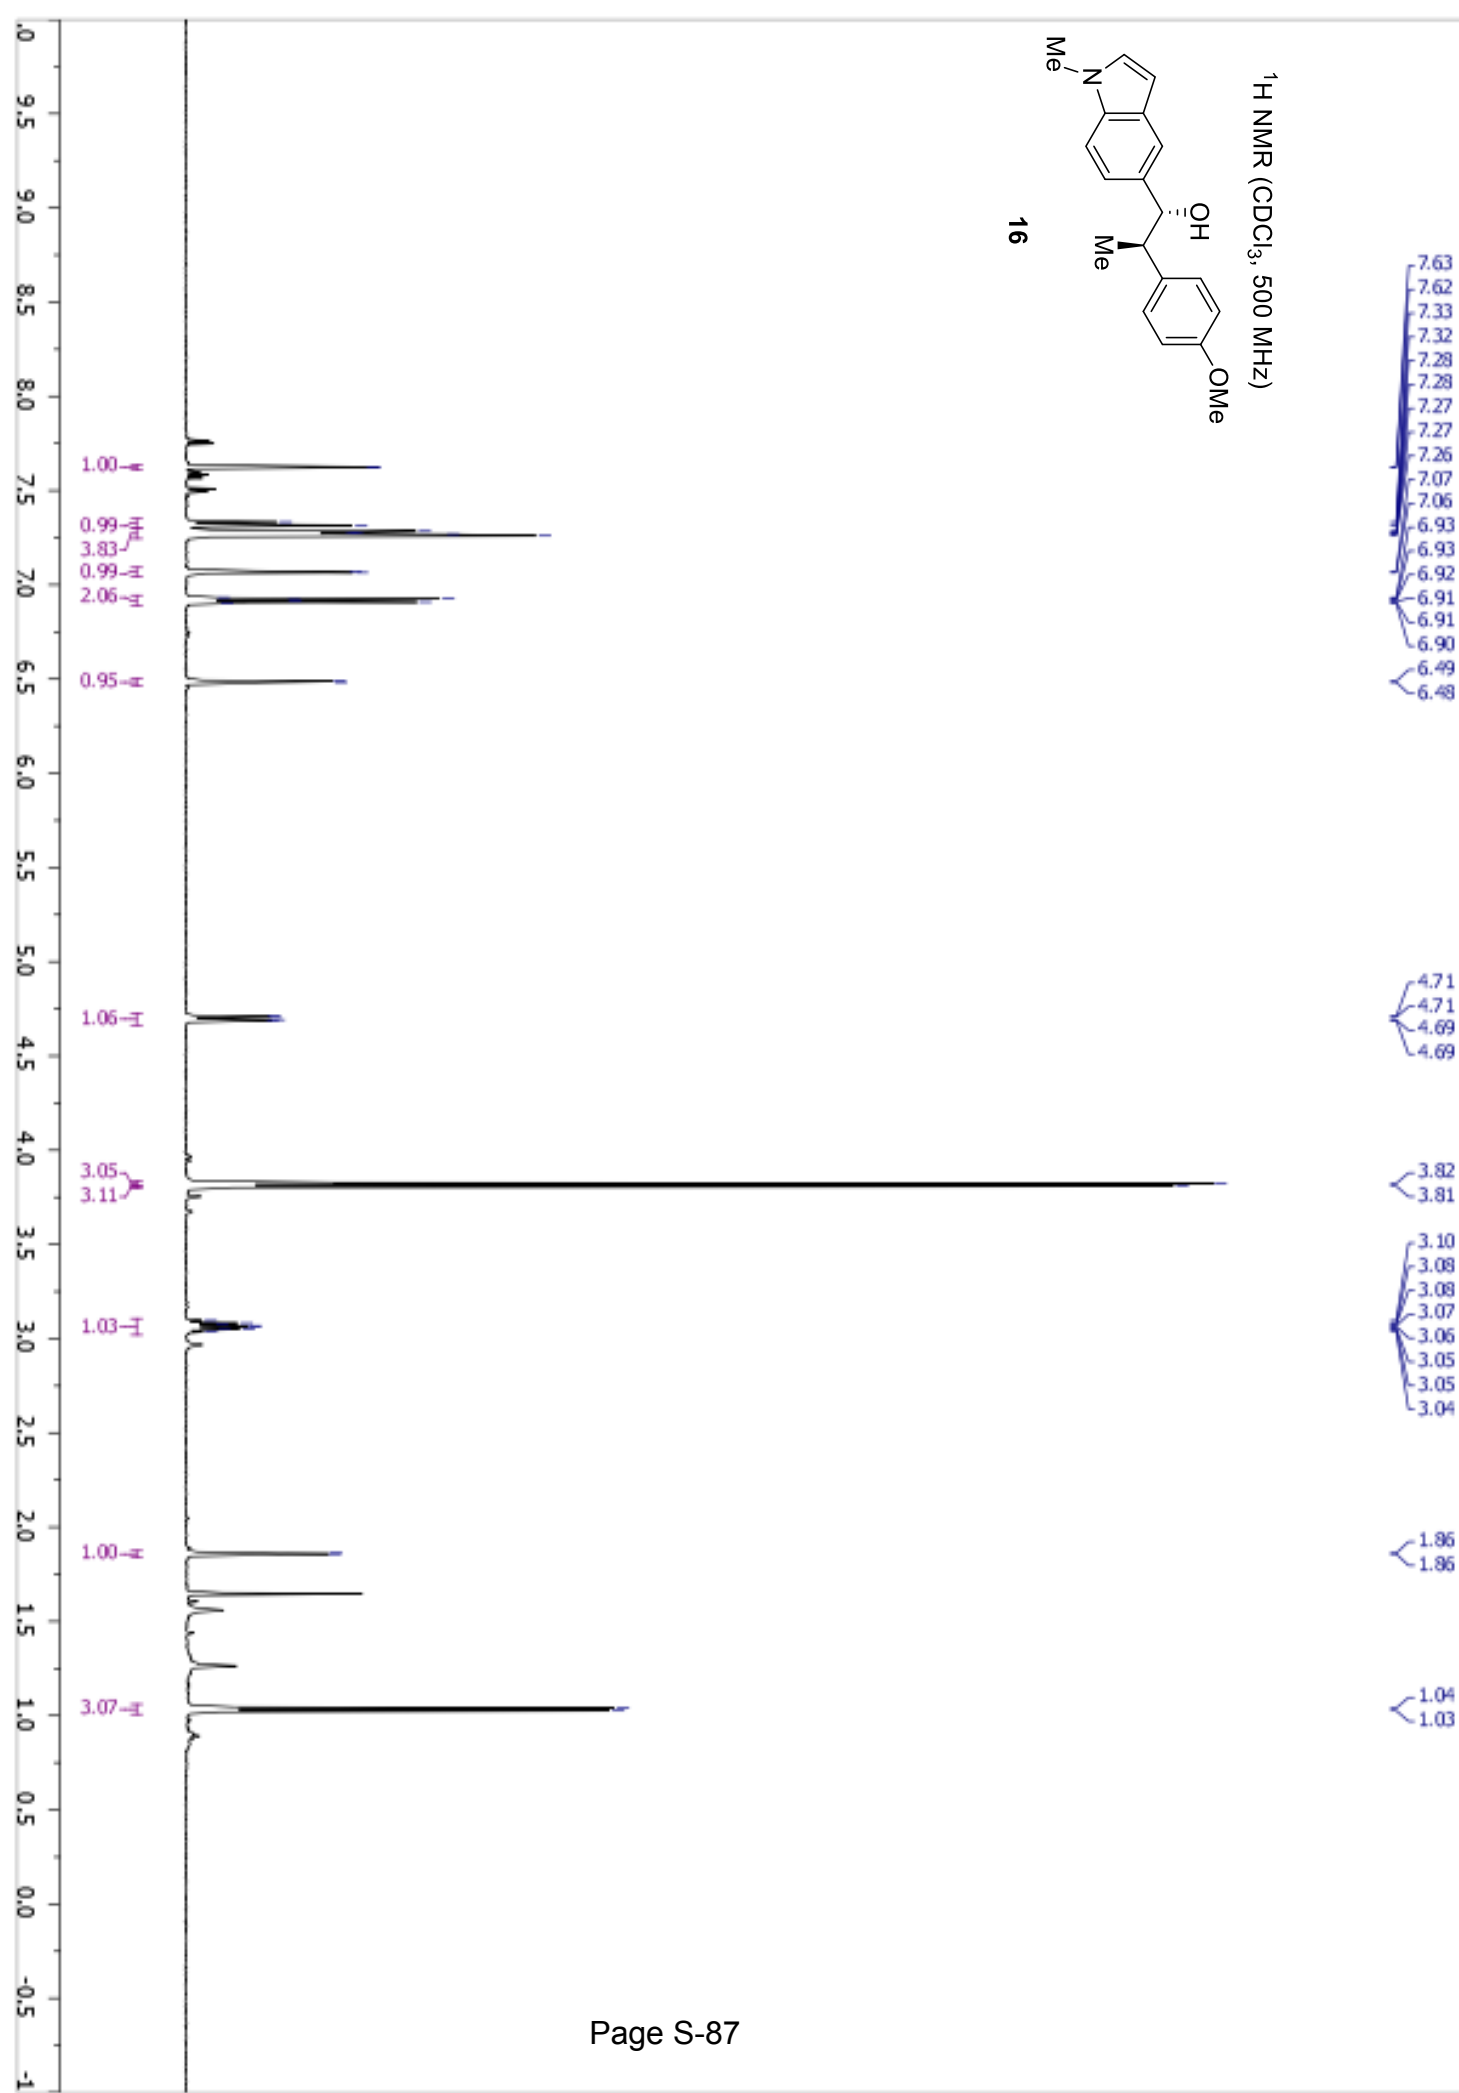

<sup>13</sup>C NMR (CDCl<sub>3</sub>, 126 MHz)

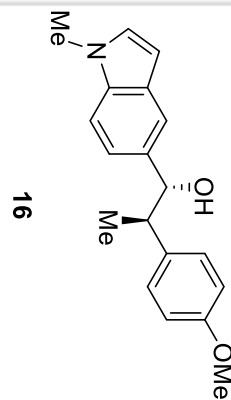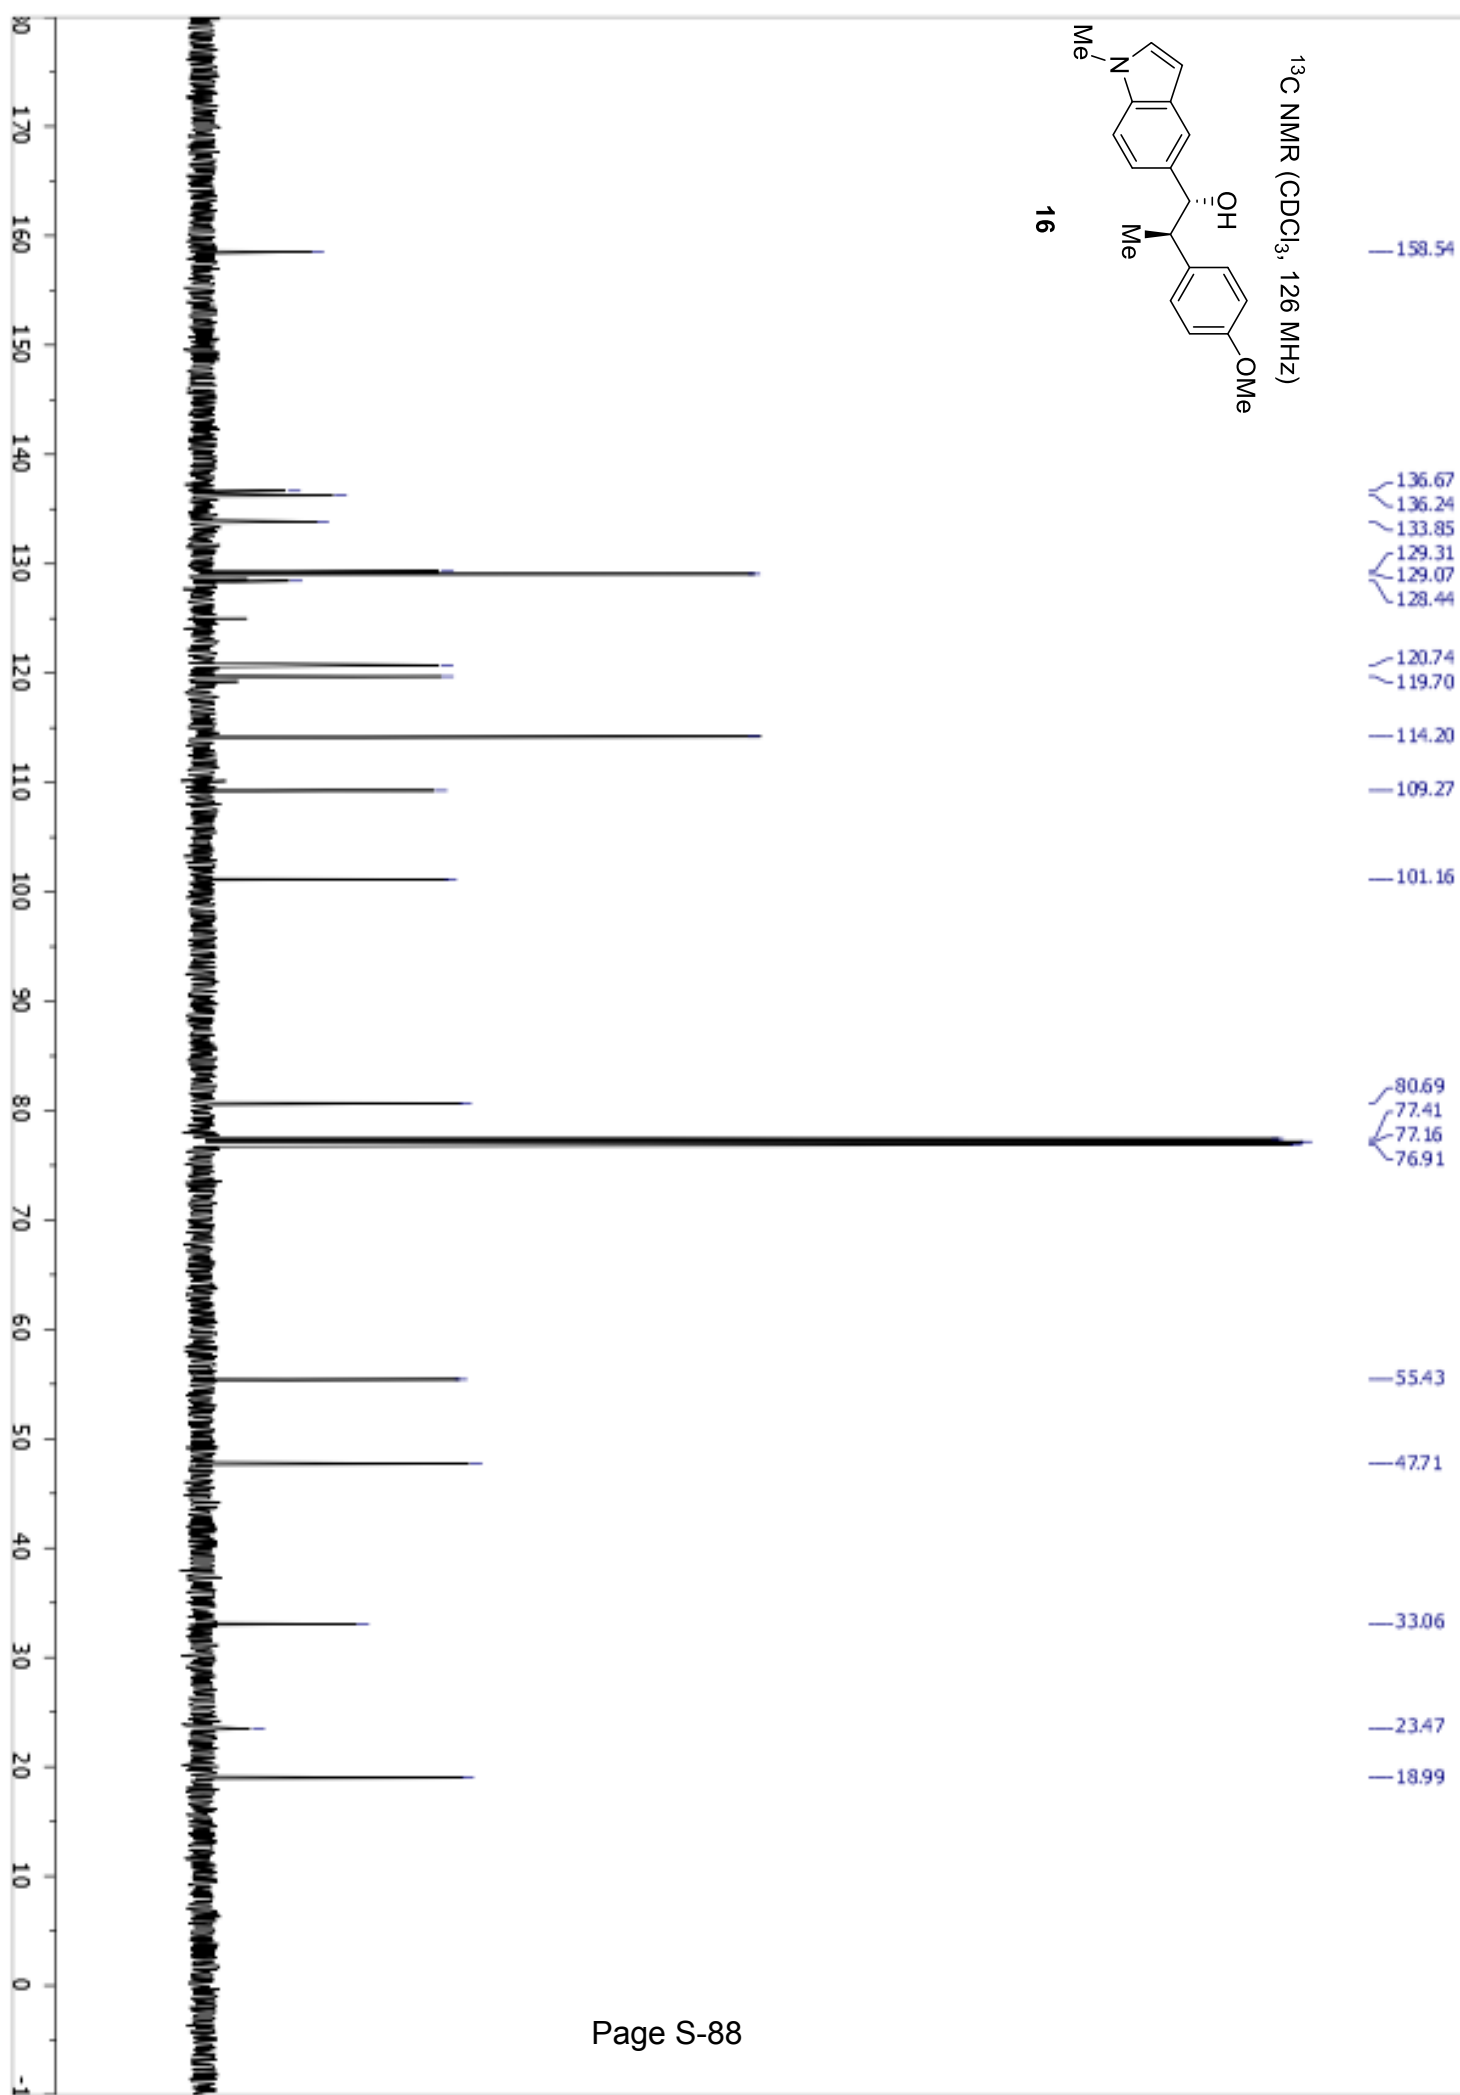



7.87  
7.86  
7.81  
7.81  
7.46  
7.45  
7.37  
7.37  
7.36  
7.35  
7.34  
7.34  
7.33  
7.33  
7.26  
7.25  
7.24  
7.24  
6.93  
6.92  
6.92  
6.91  
6.91

<sup>1</sup>H NMR (CDCl<sub>3</sub>, 500 MHz)

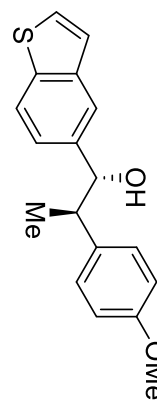

17

4.73  
4.72

3.82  
3.82

3.06  
3.04  
3.04  
3.03

1.95  
1.95

1.08  
1.07

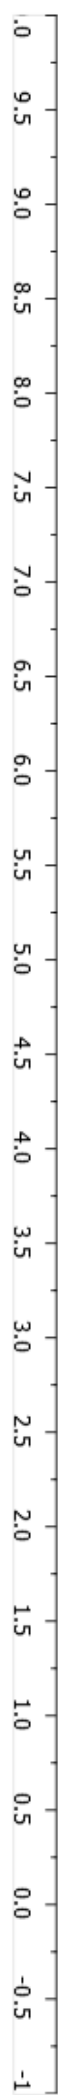

$^{13}\text{C}$  NMR ( $\text{CDCl}_3$ , 151 MHz)

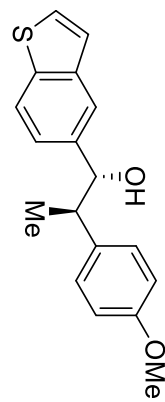

17

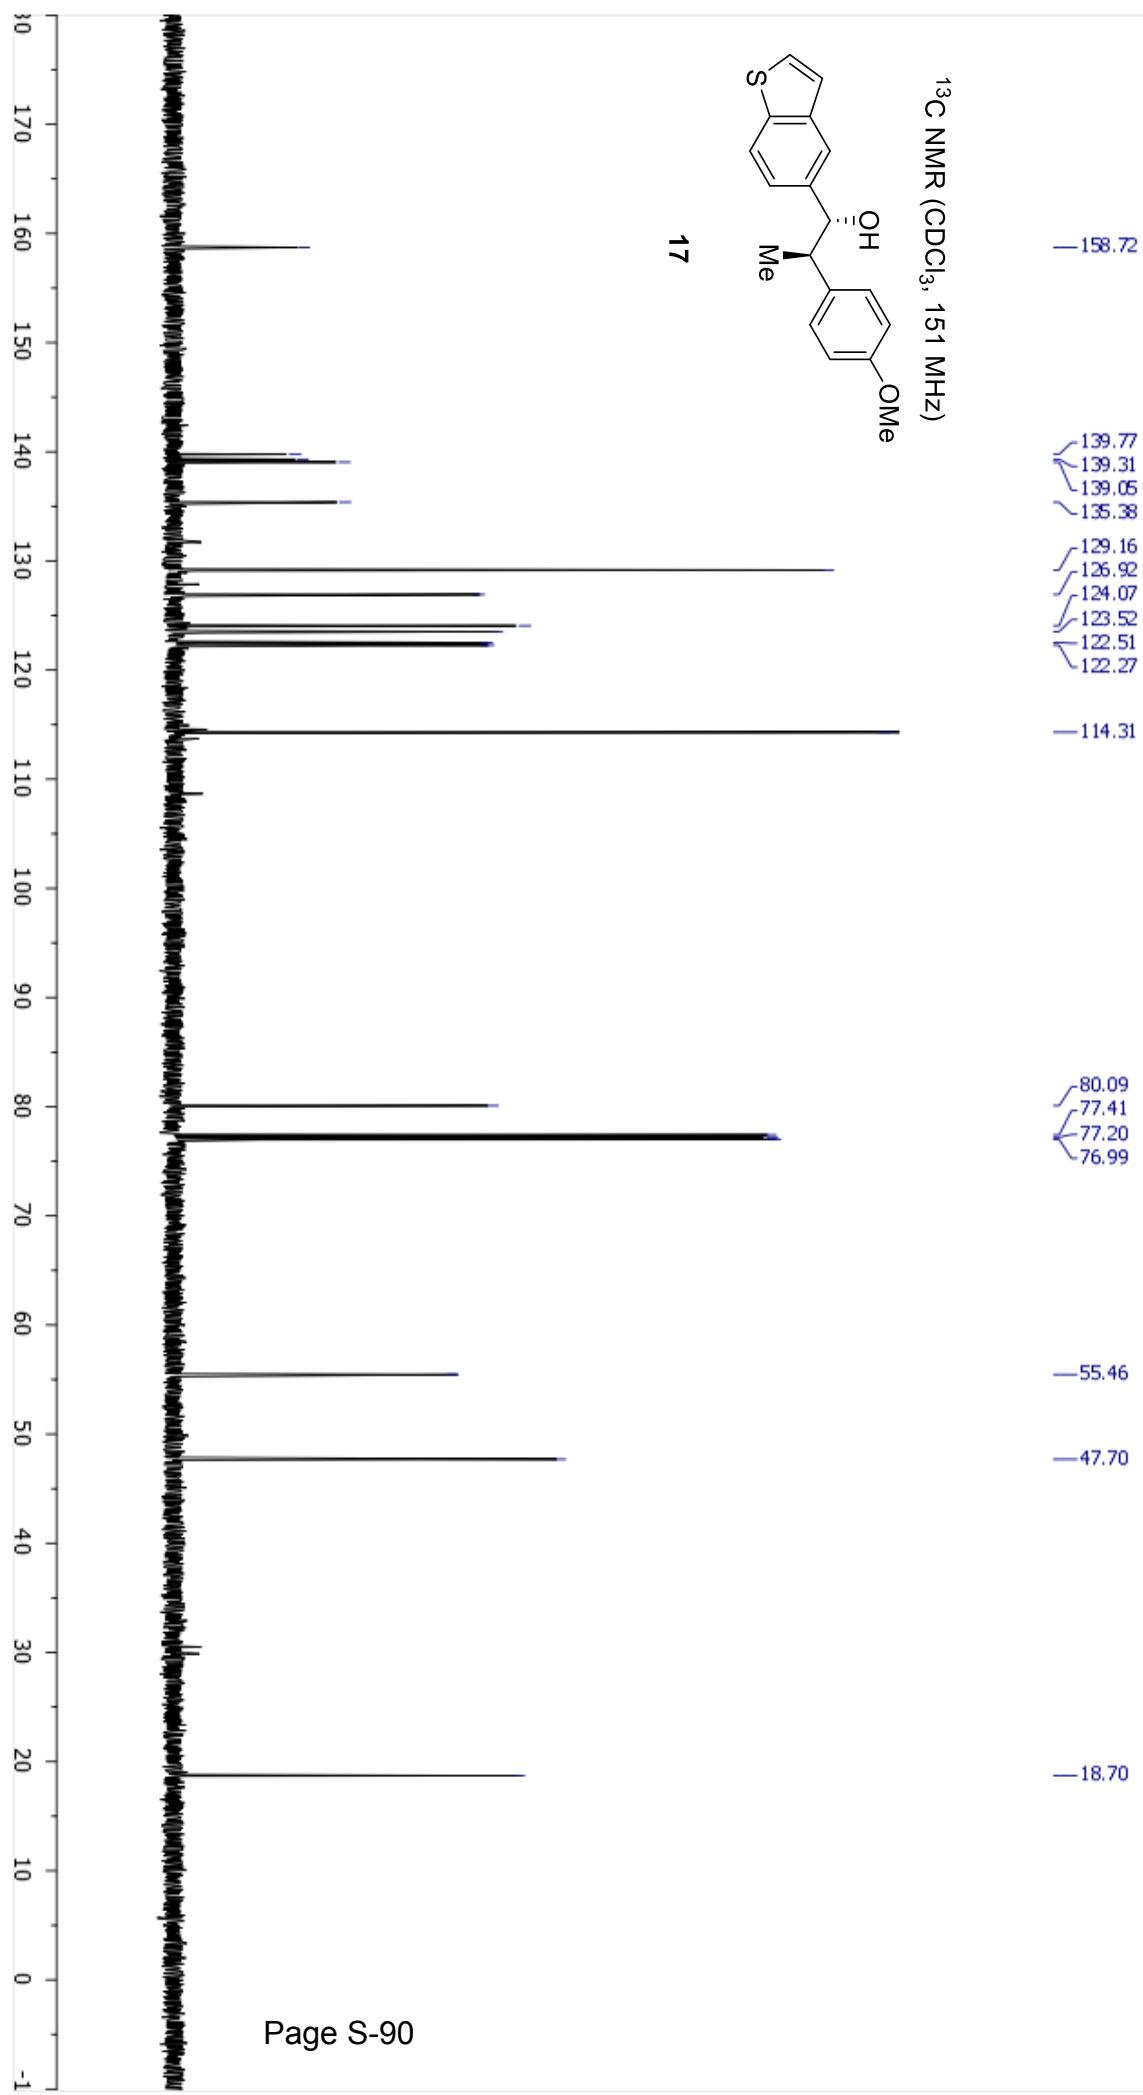

<sup>1</sup>H NMR (CDCl<sub>3</sub>, 500 MHz)

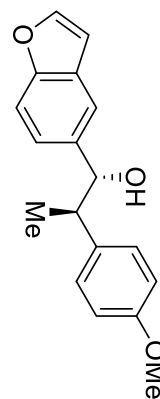

18

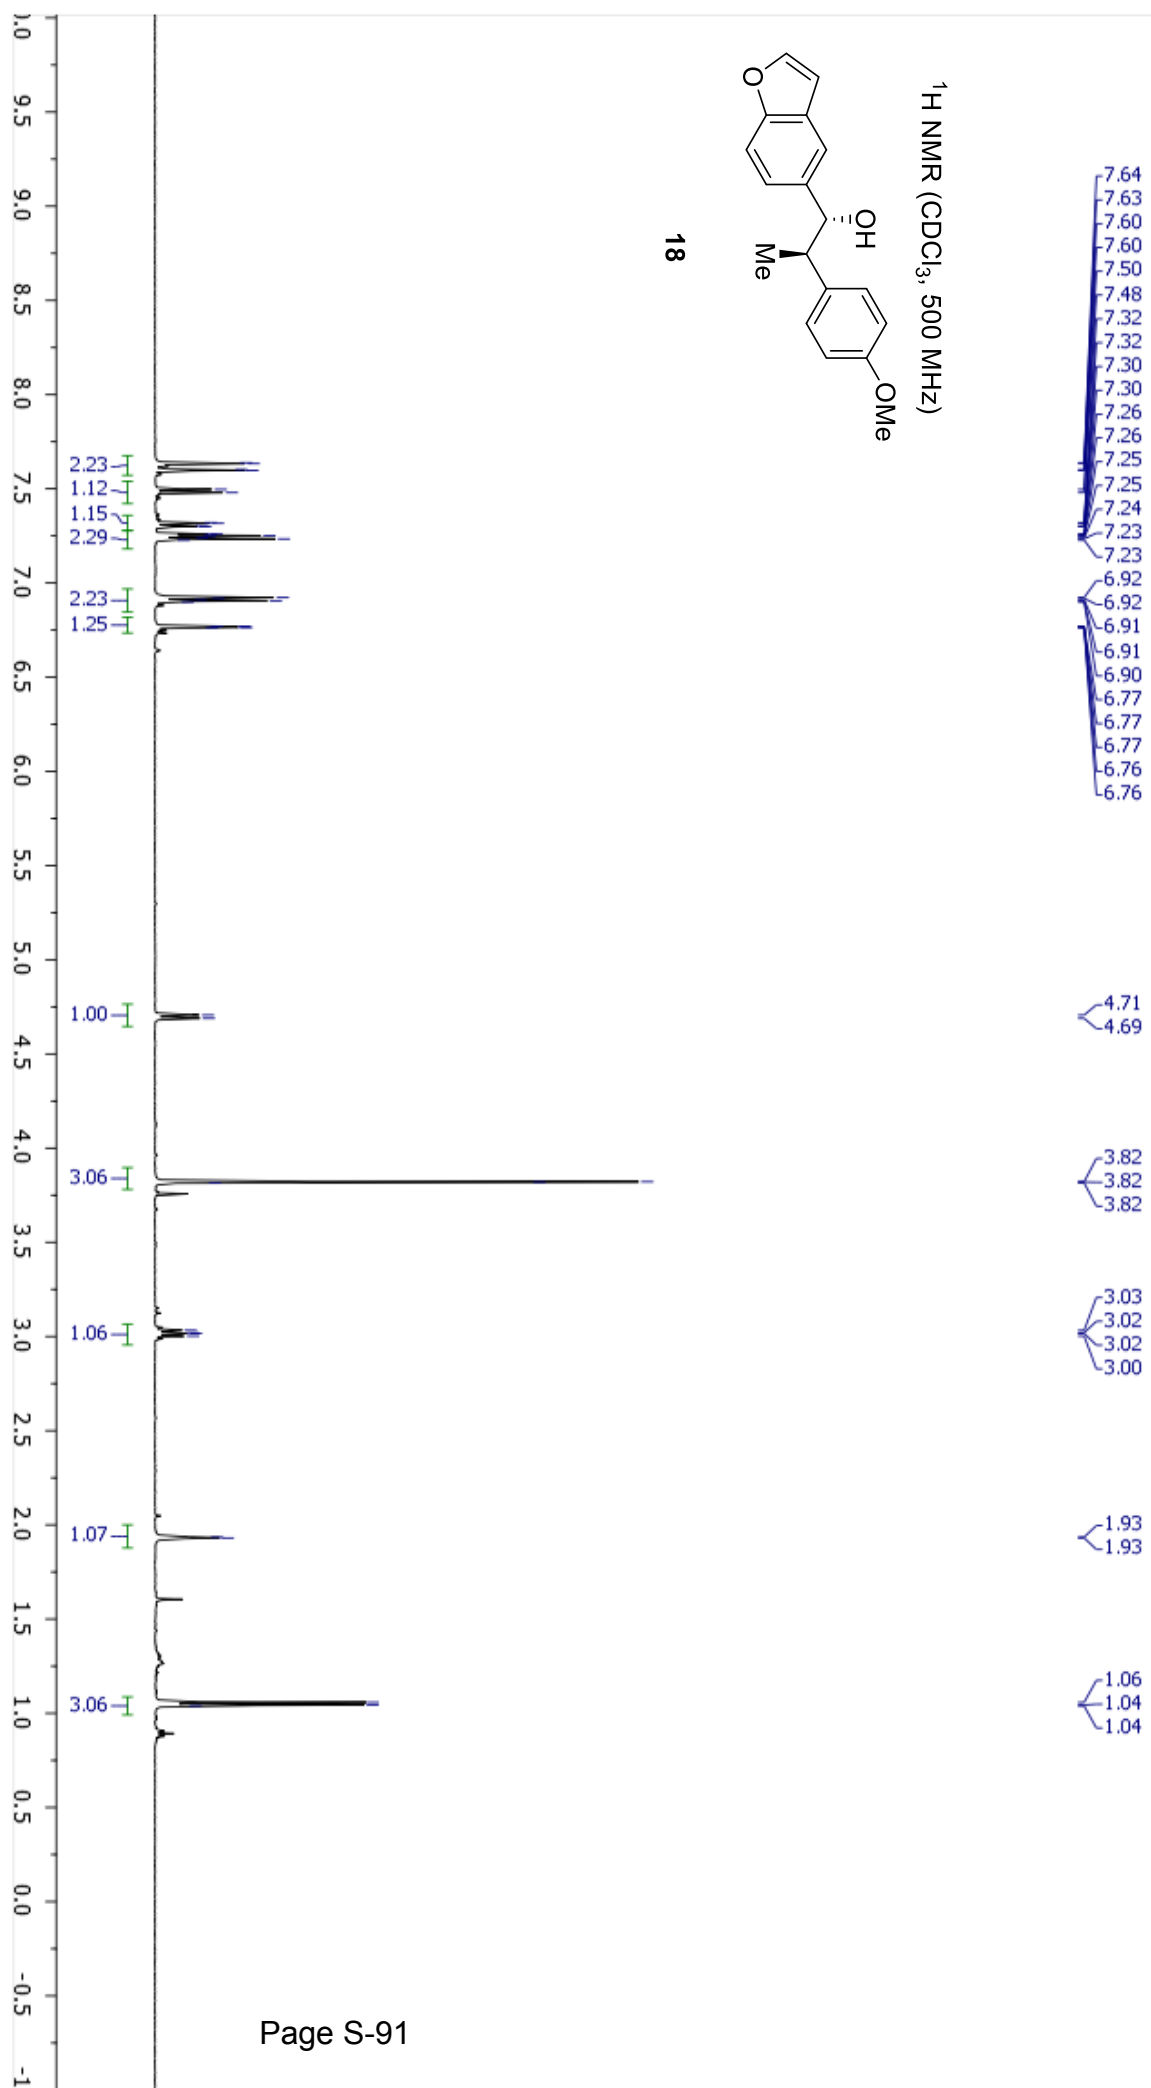

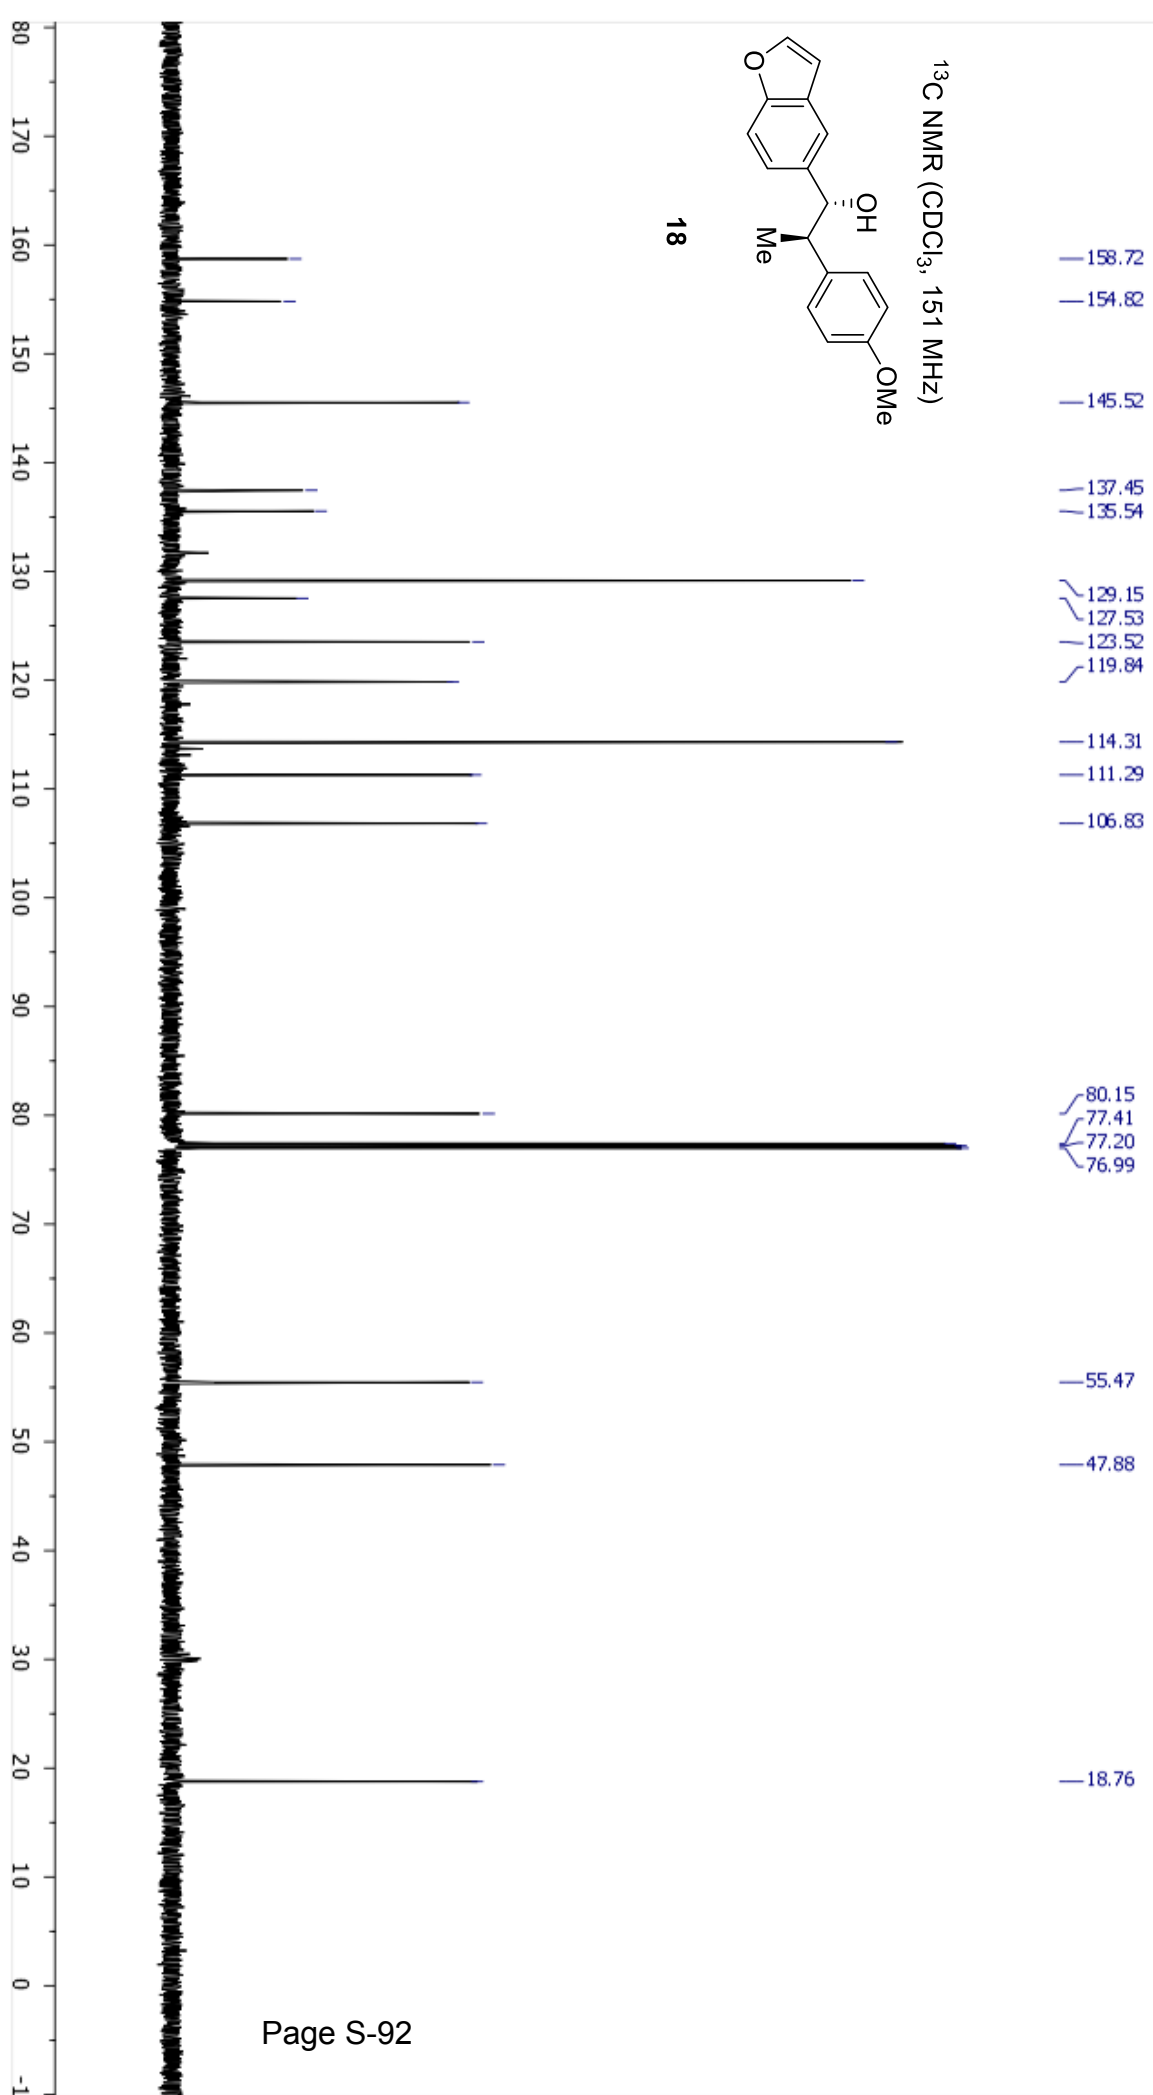

<sup>1</sup>H NMR (CDCl<sub>3</sub>, 500 MHz)

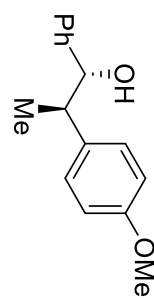

19

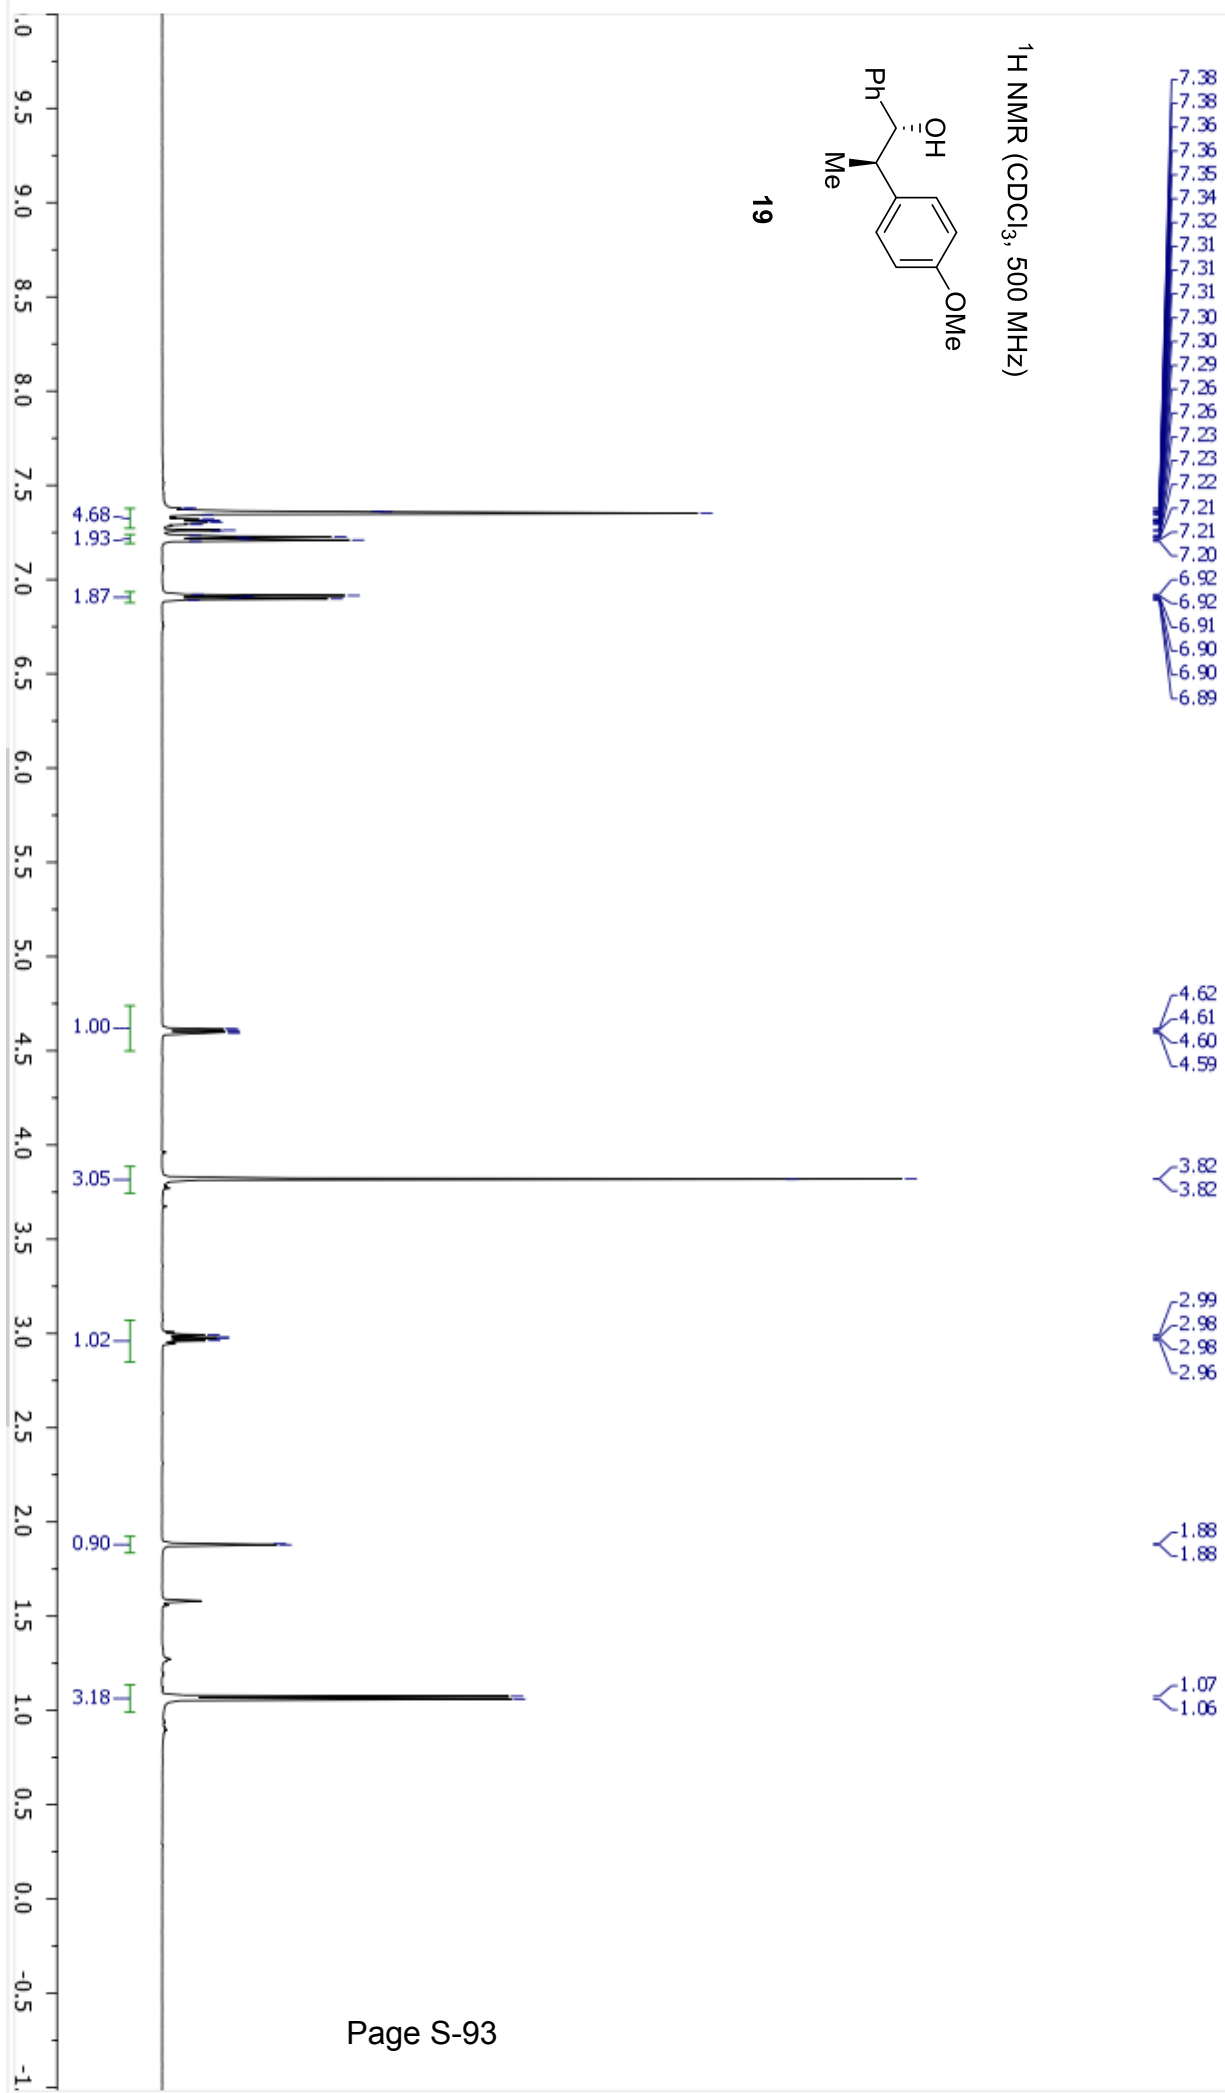

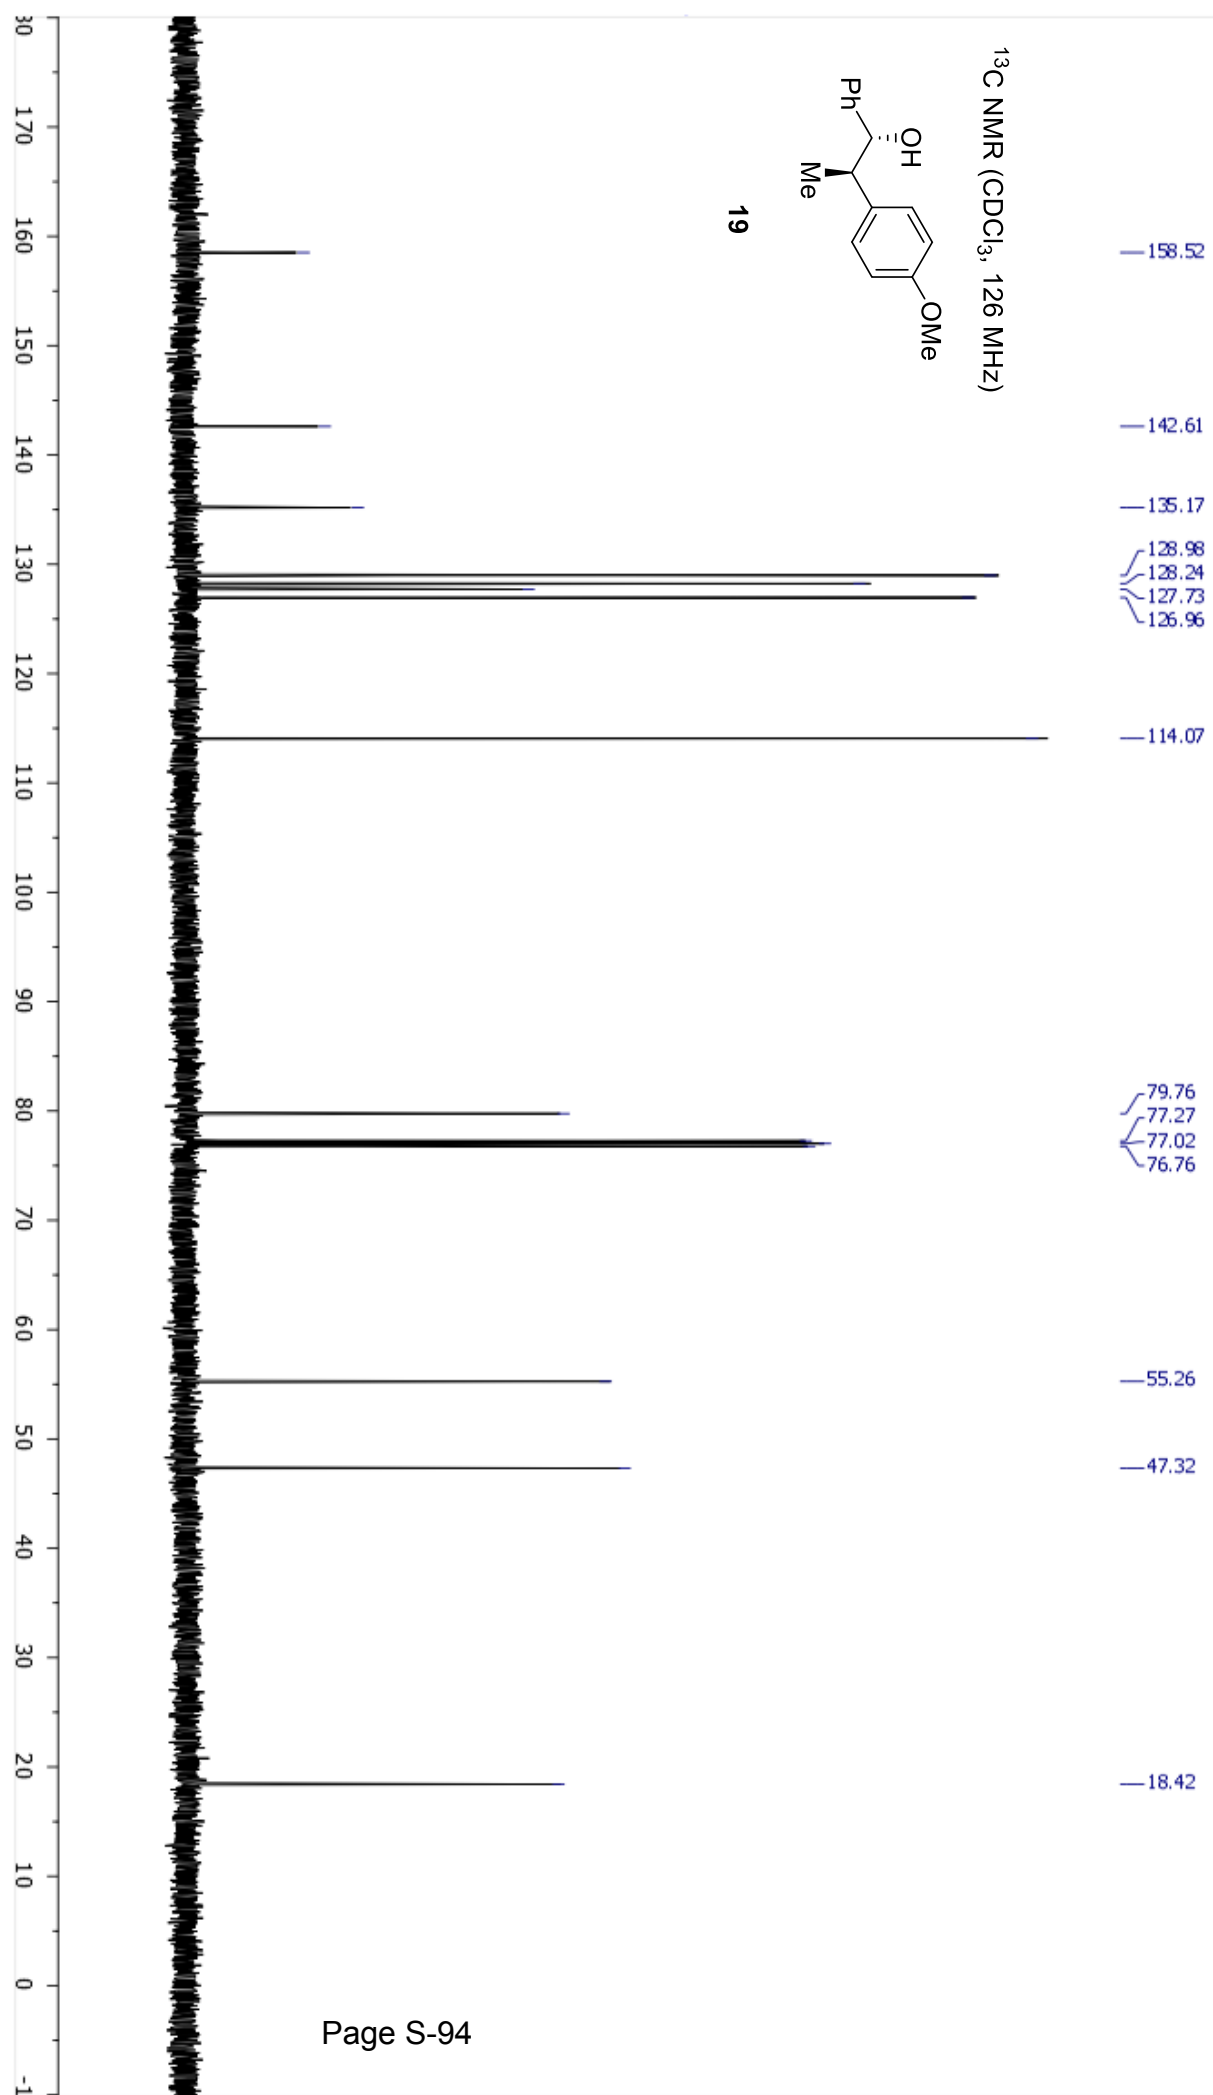

<sup>1</sup>H NMR (CDCl<sub>3</sub>, 500 MHz)

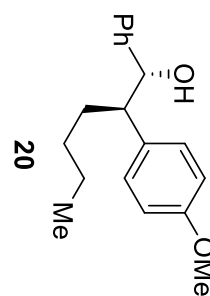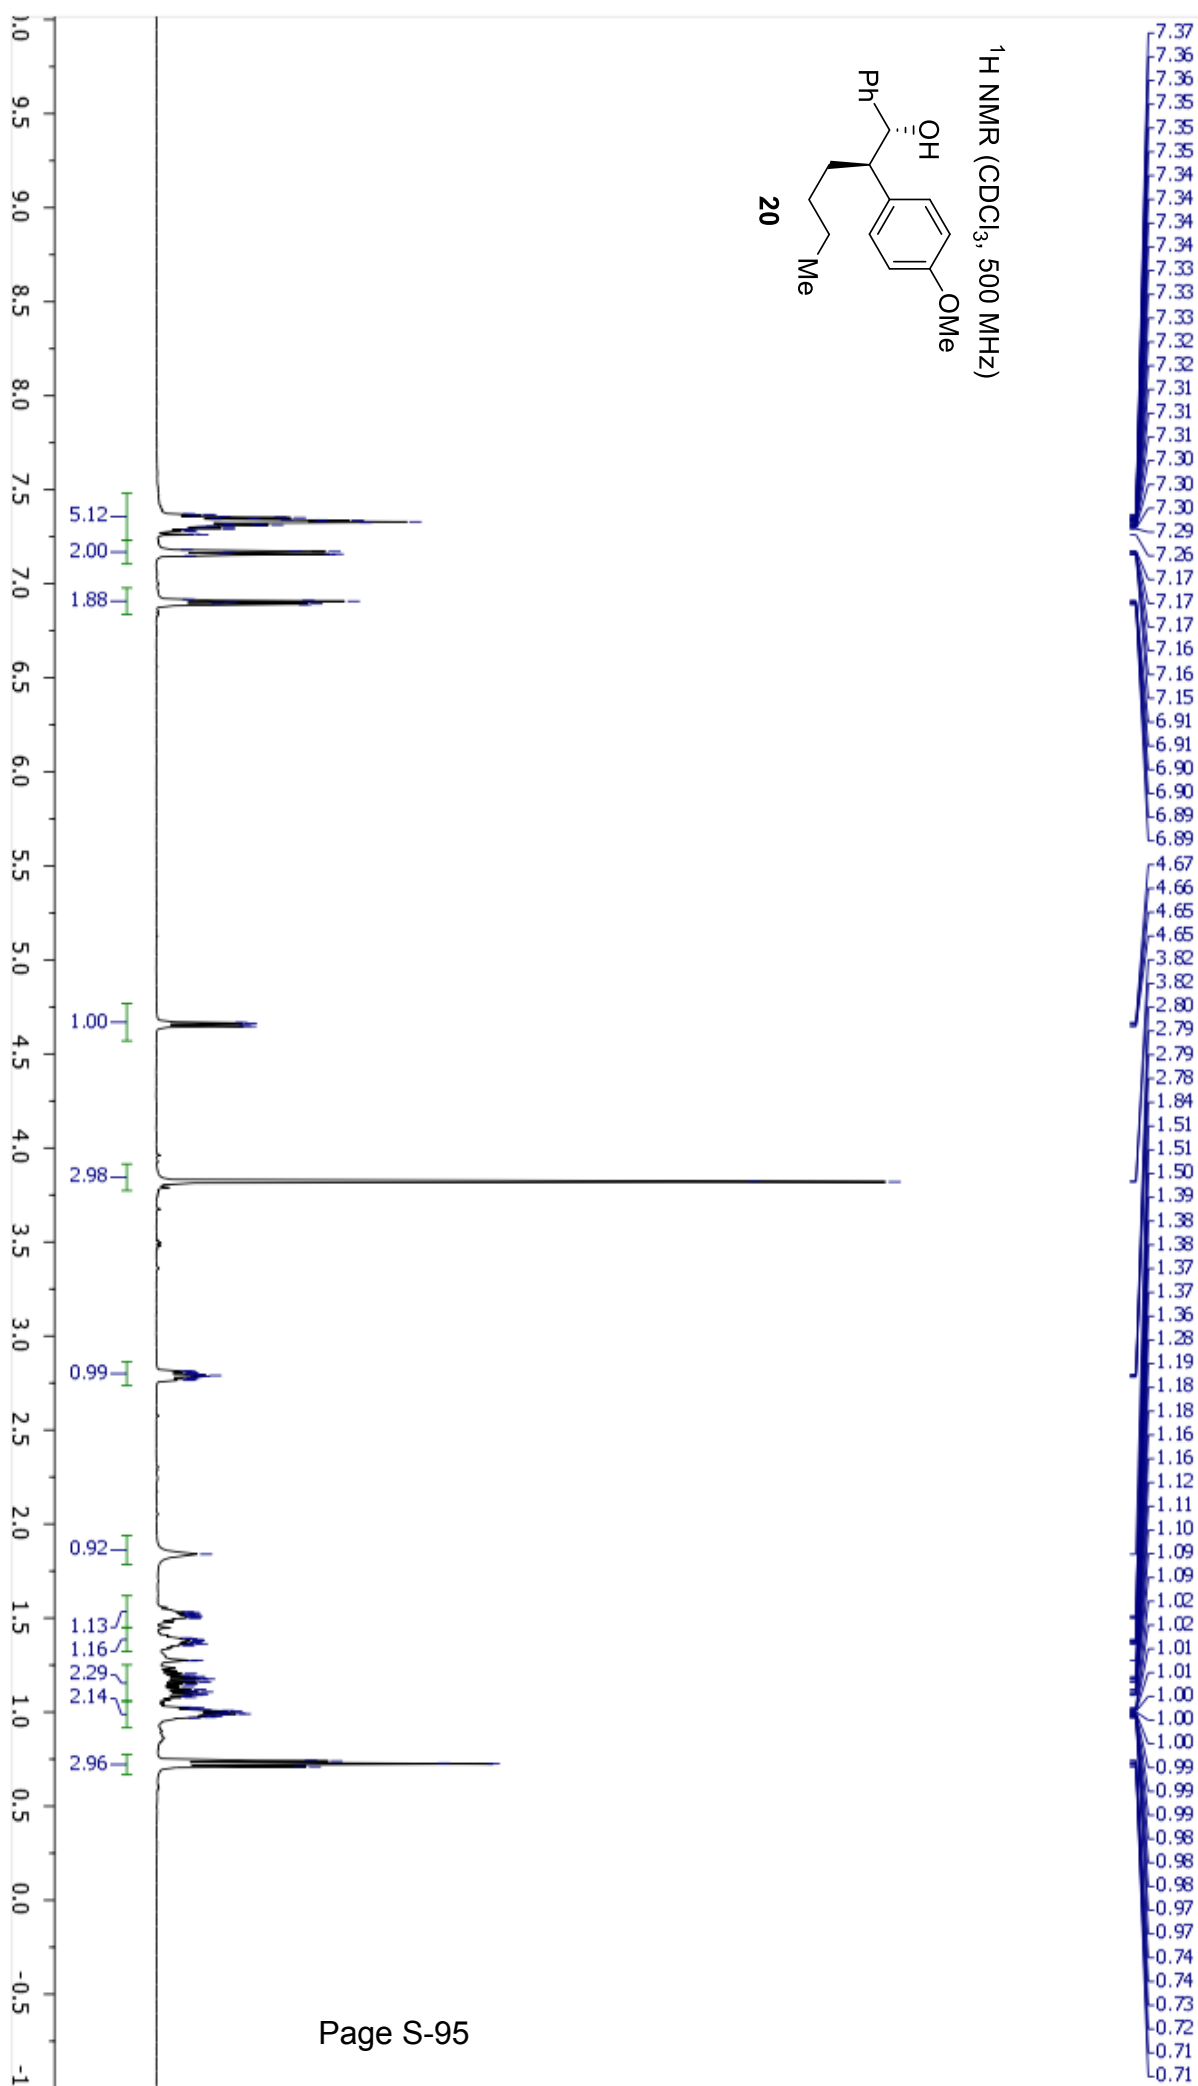

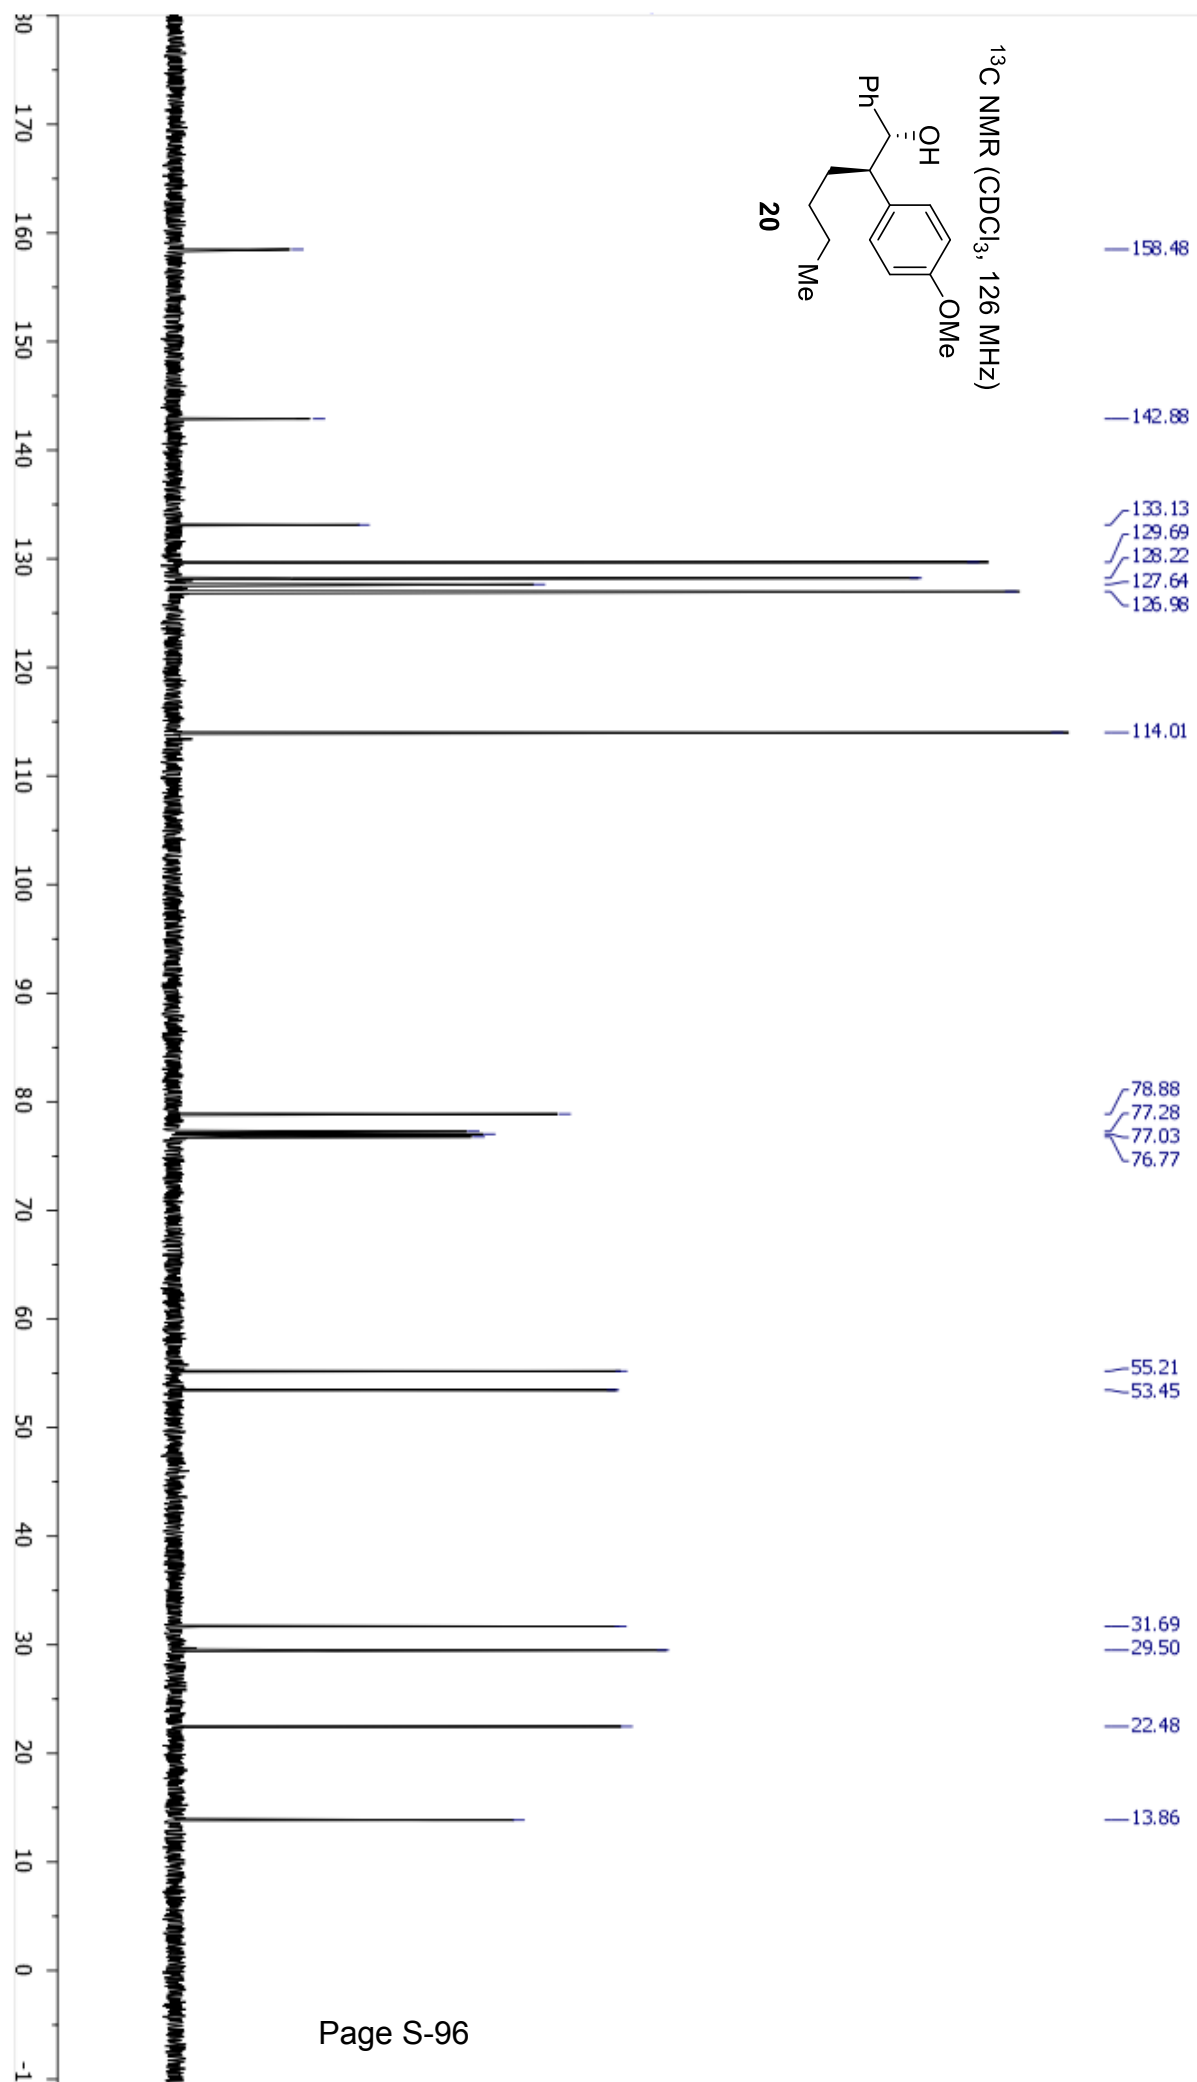



<sup>1</sup>H NMR (CDCl<sub>3</sub>, 500 MHz)

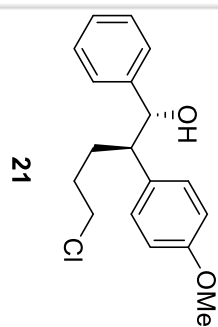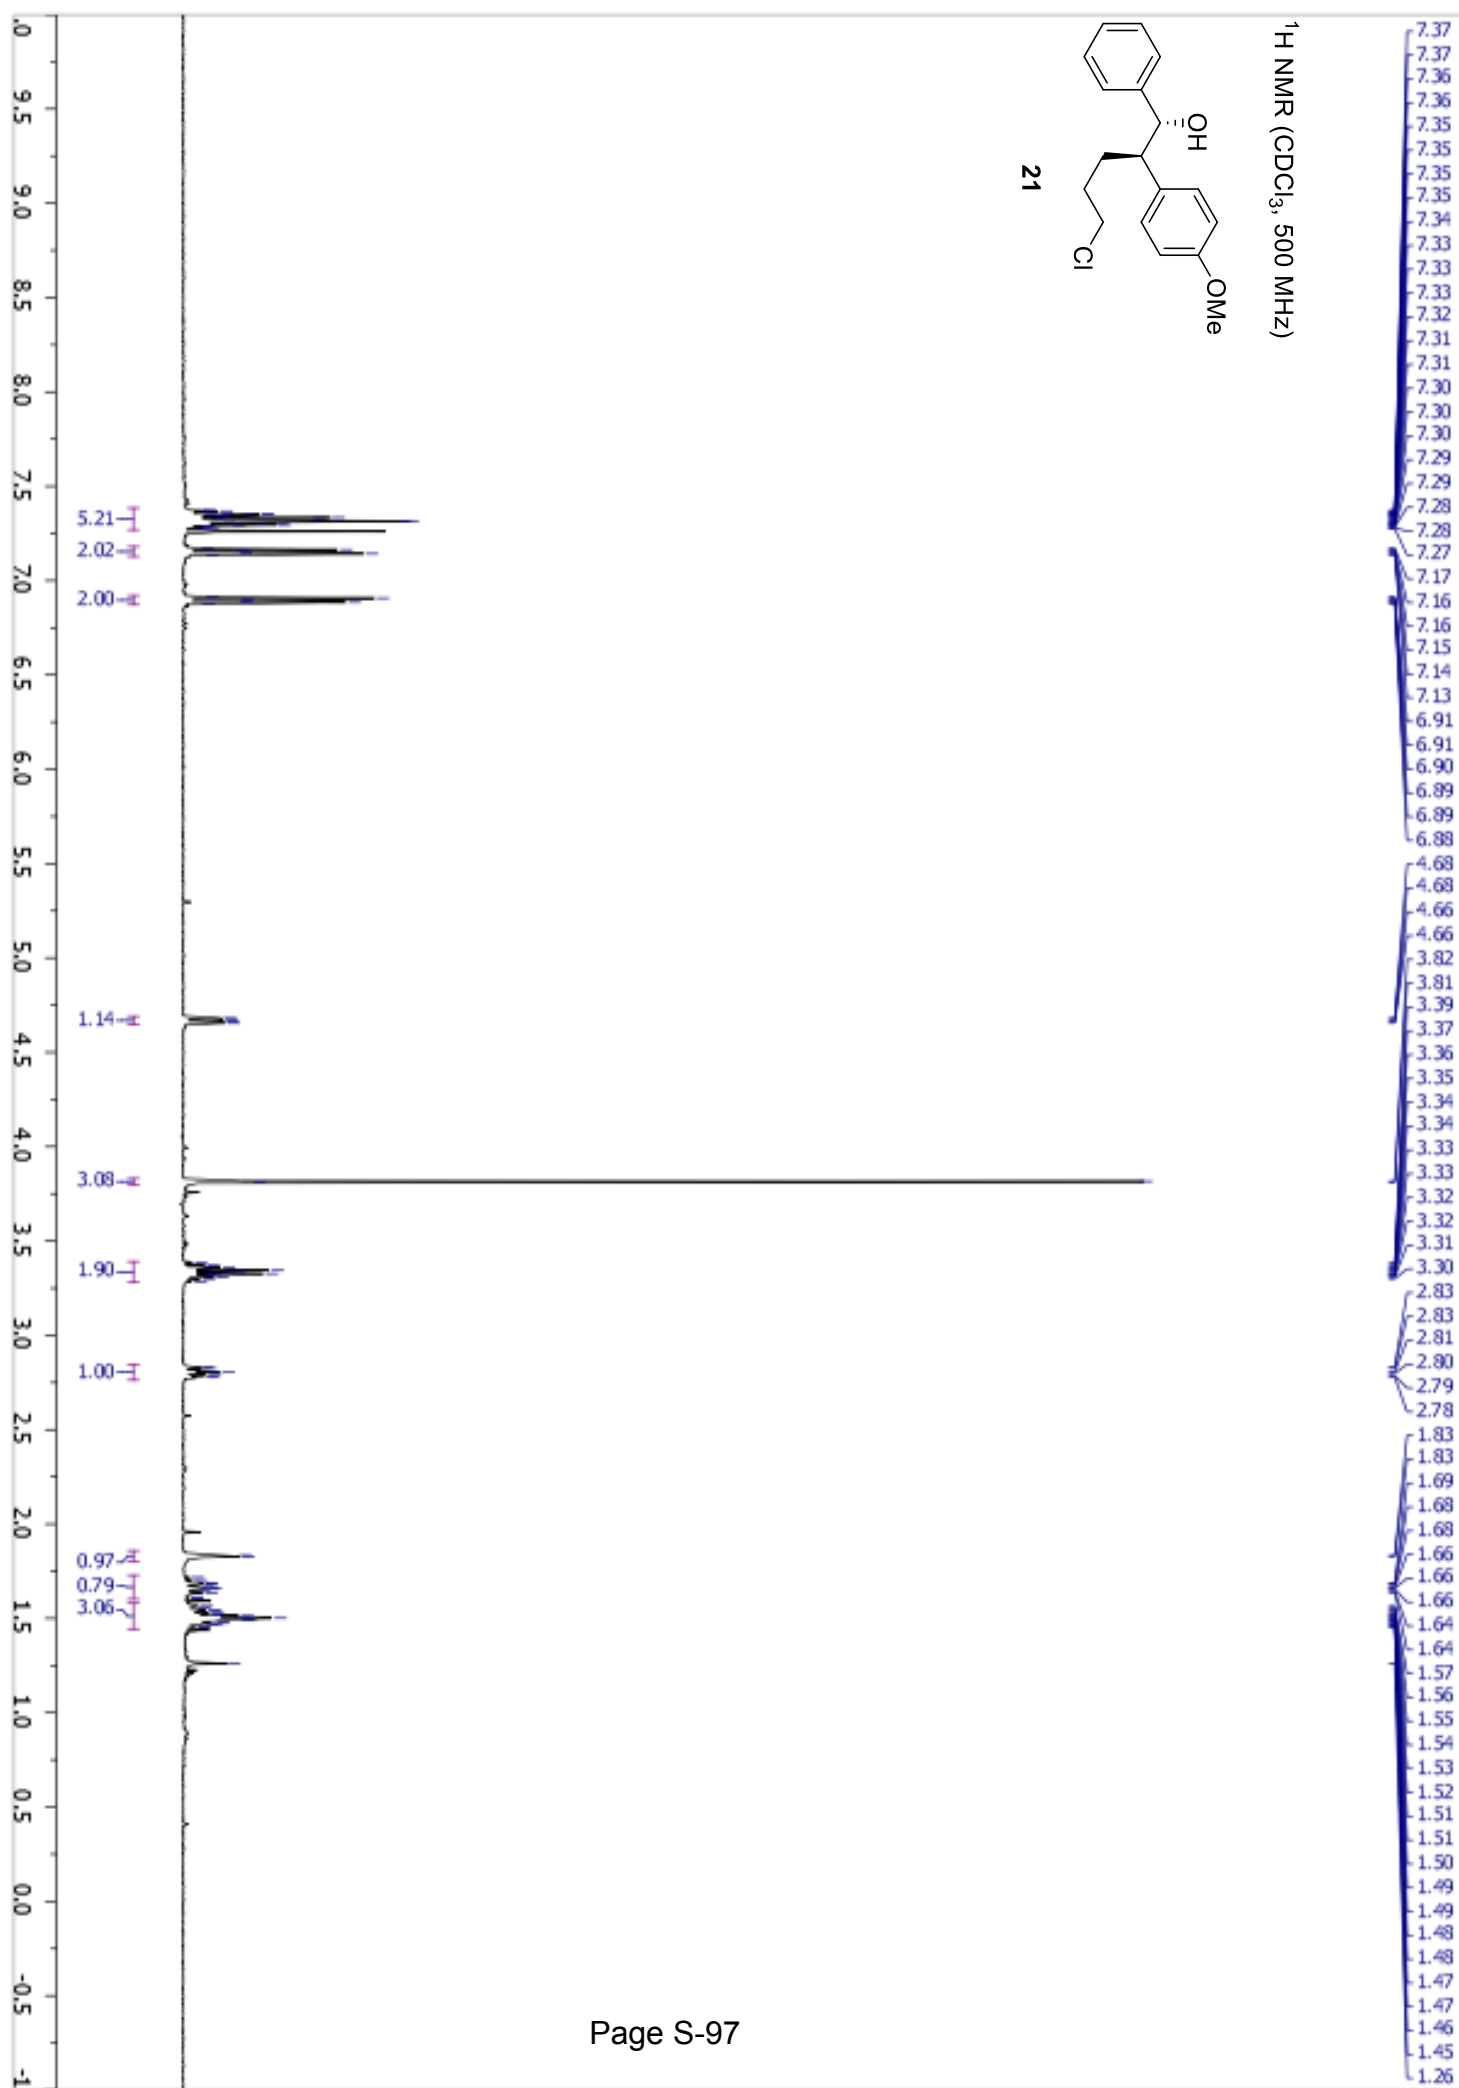

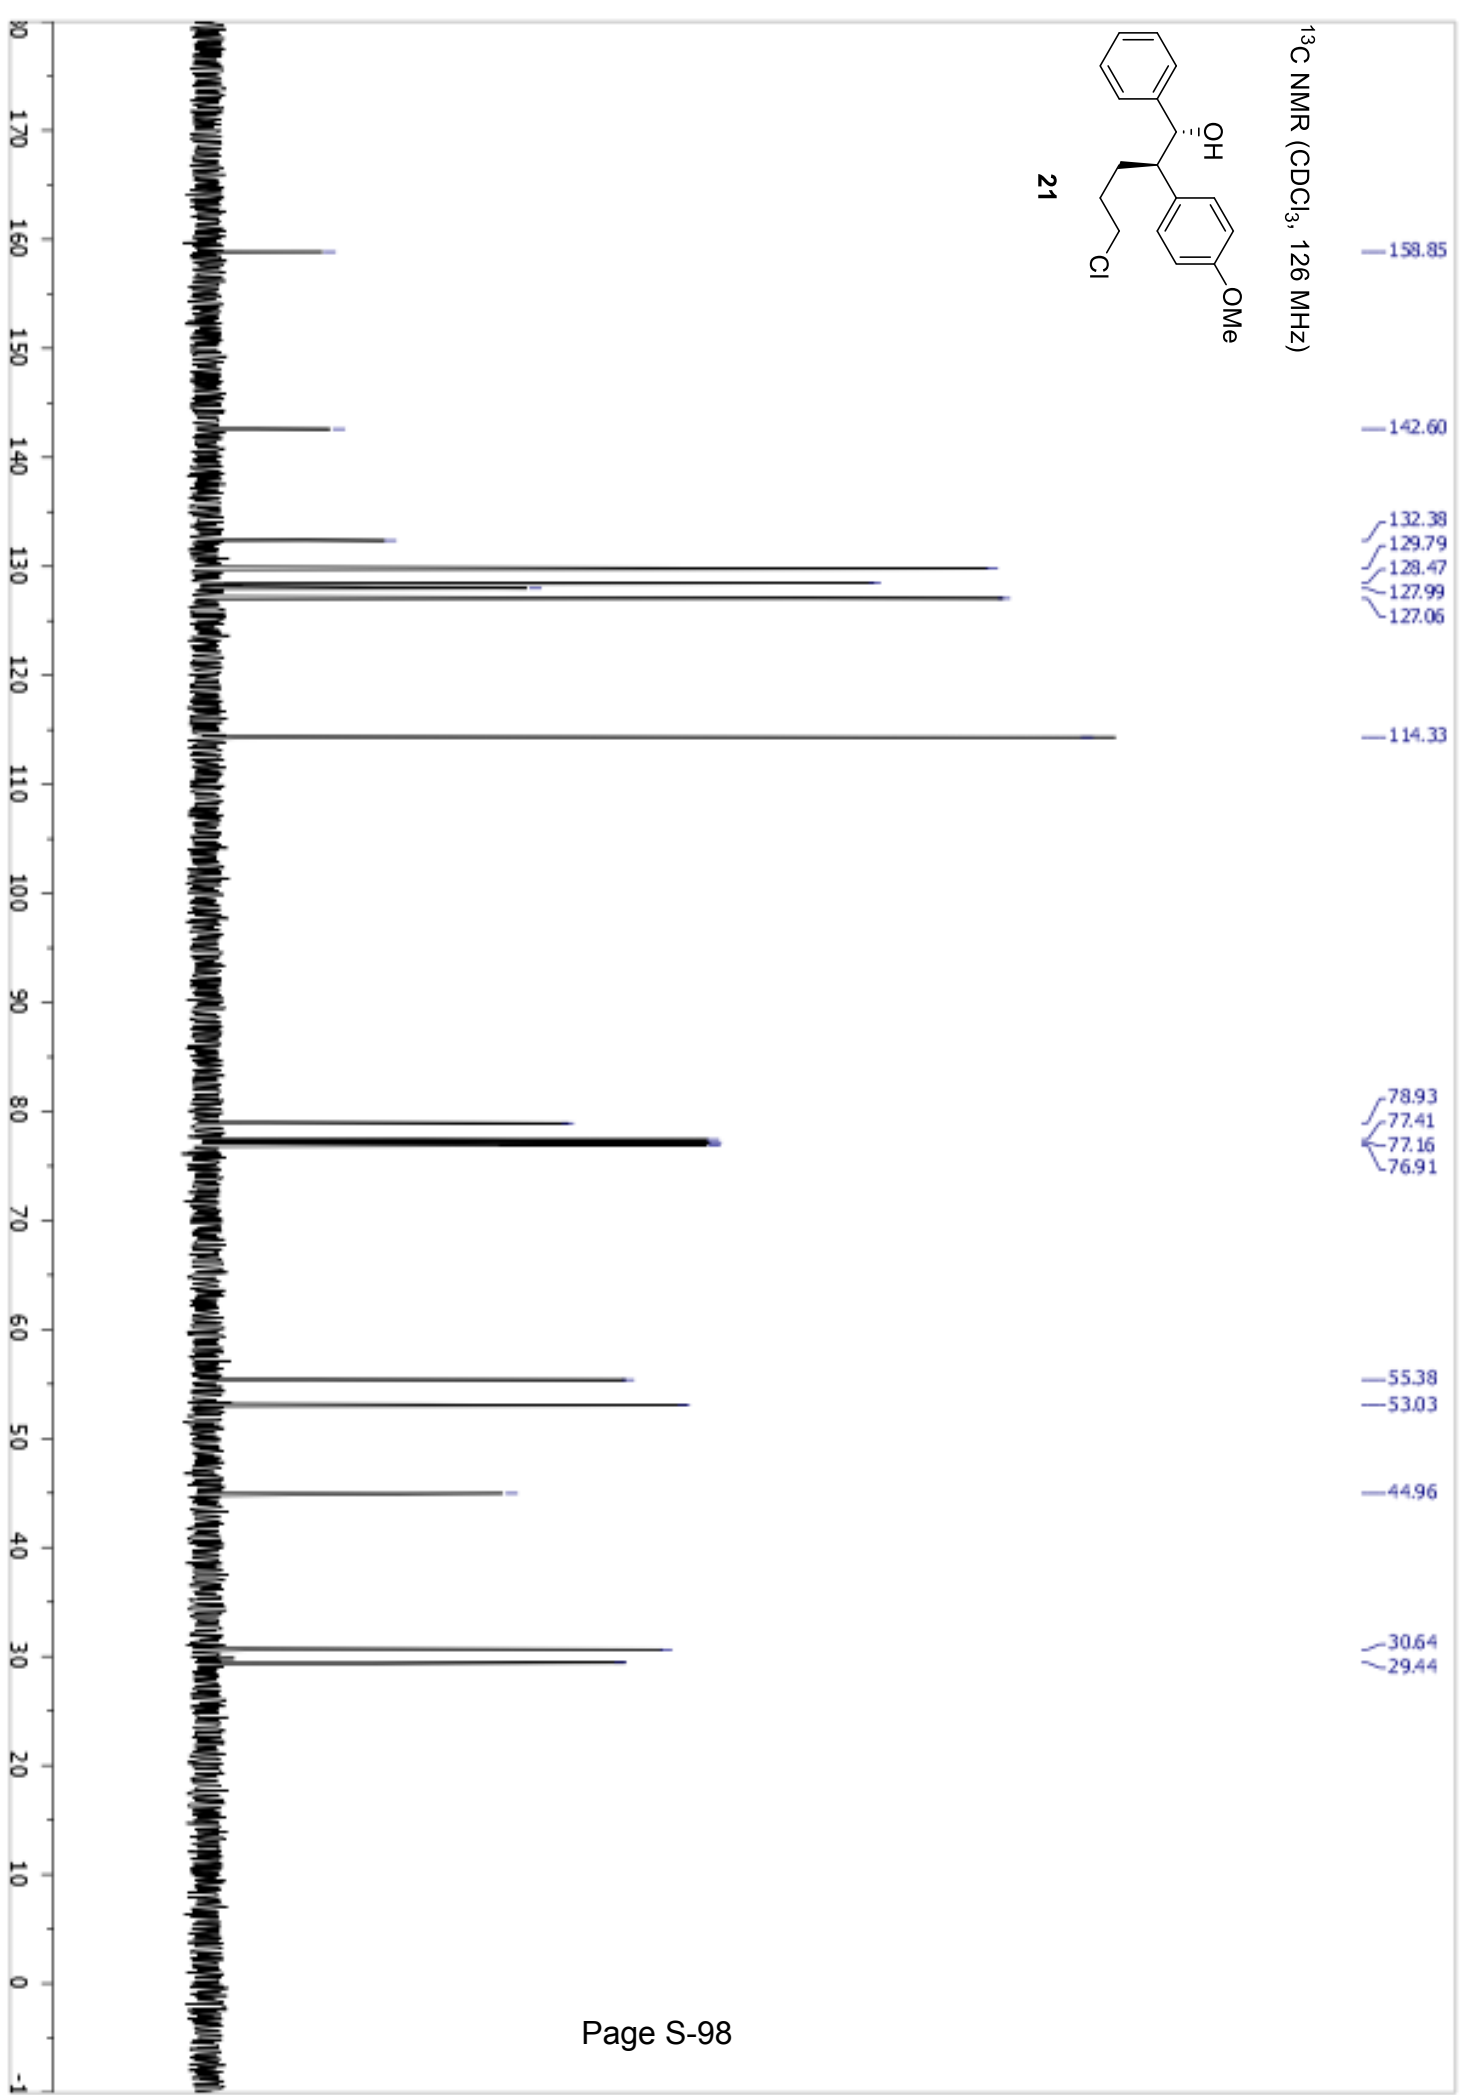

<sup>1</sup>H NMR (CDCl<sub>3</sub>, 600 MHz)

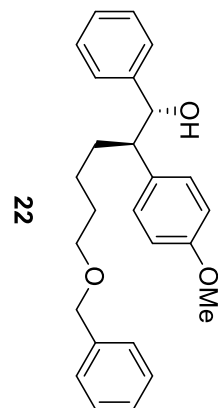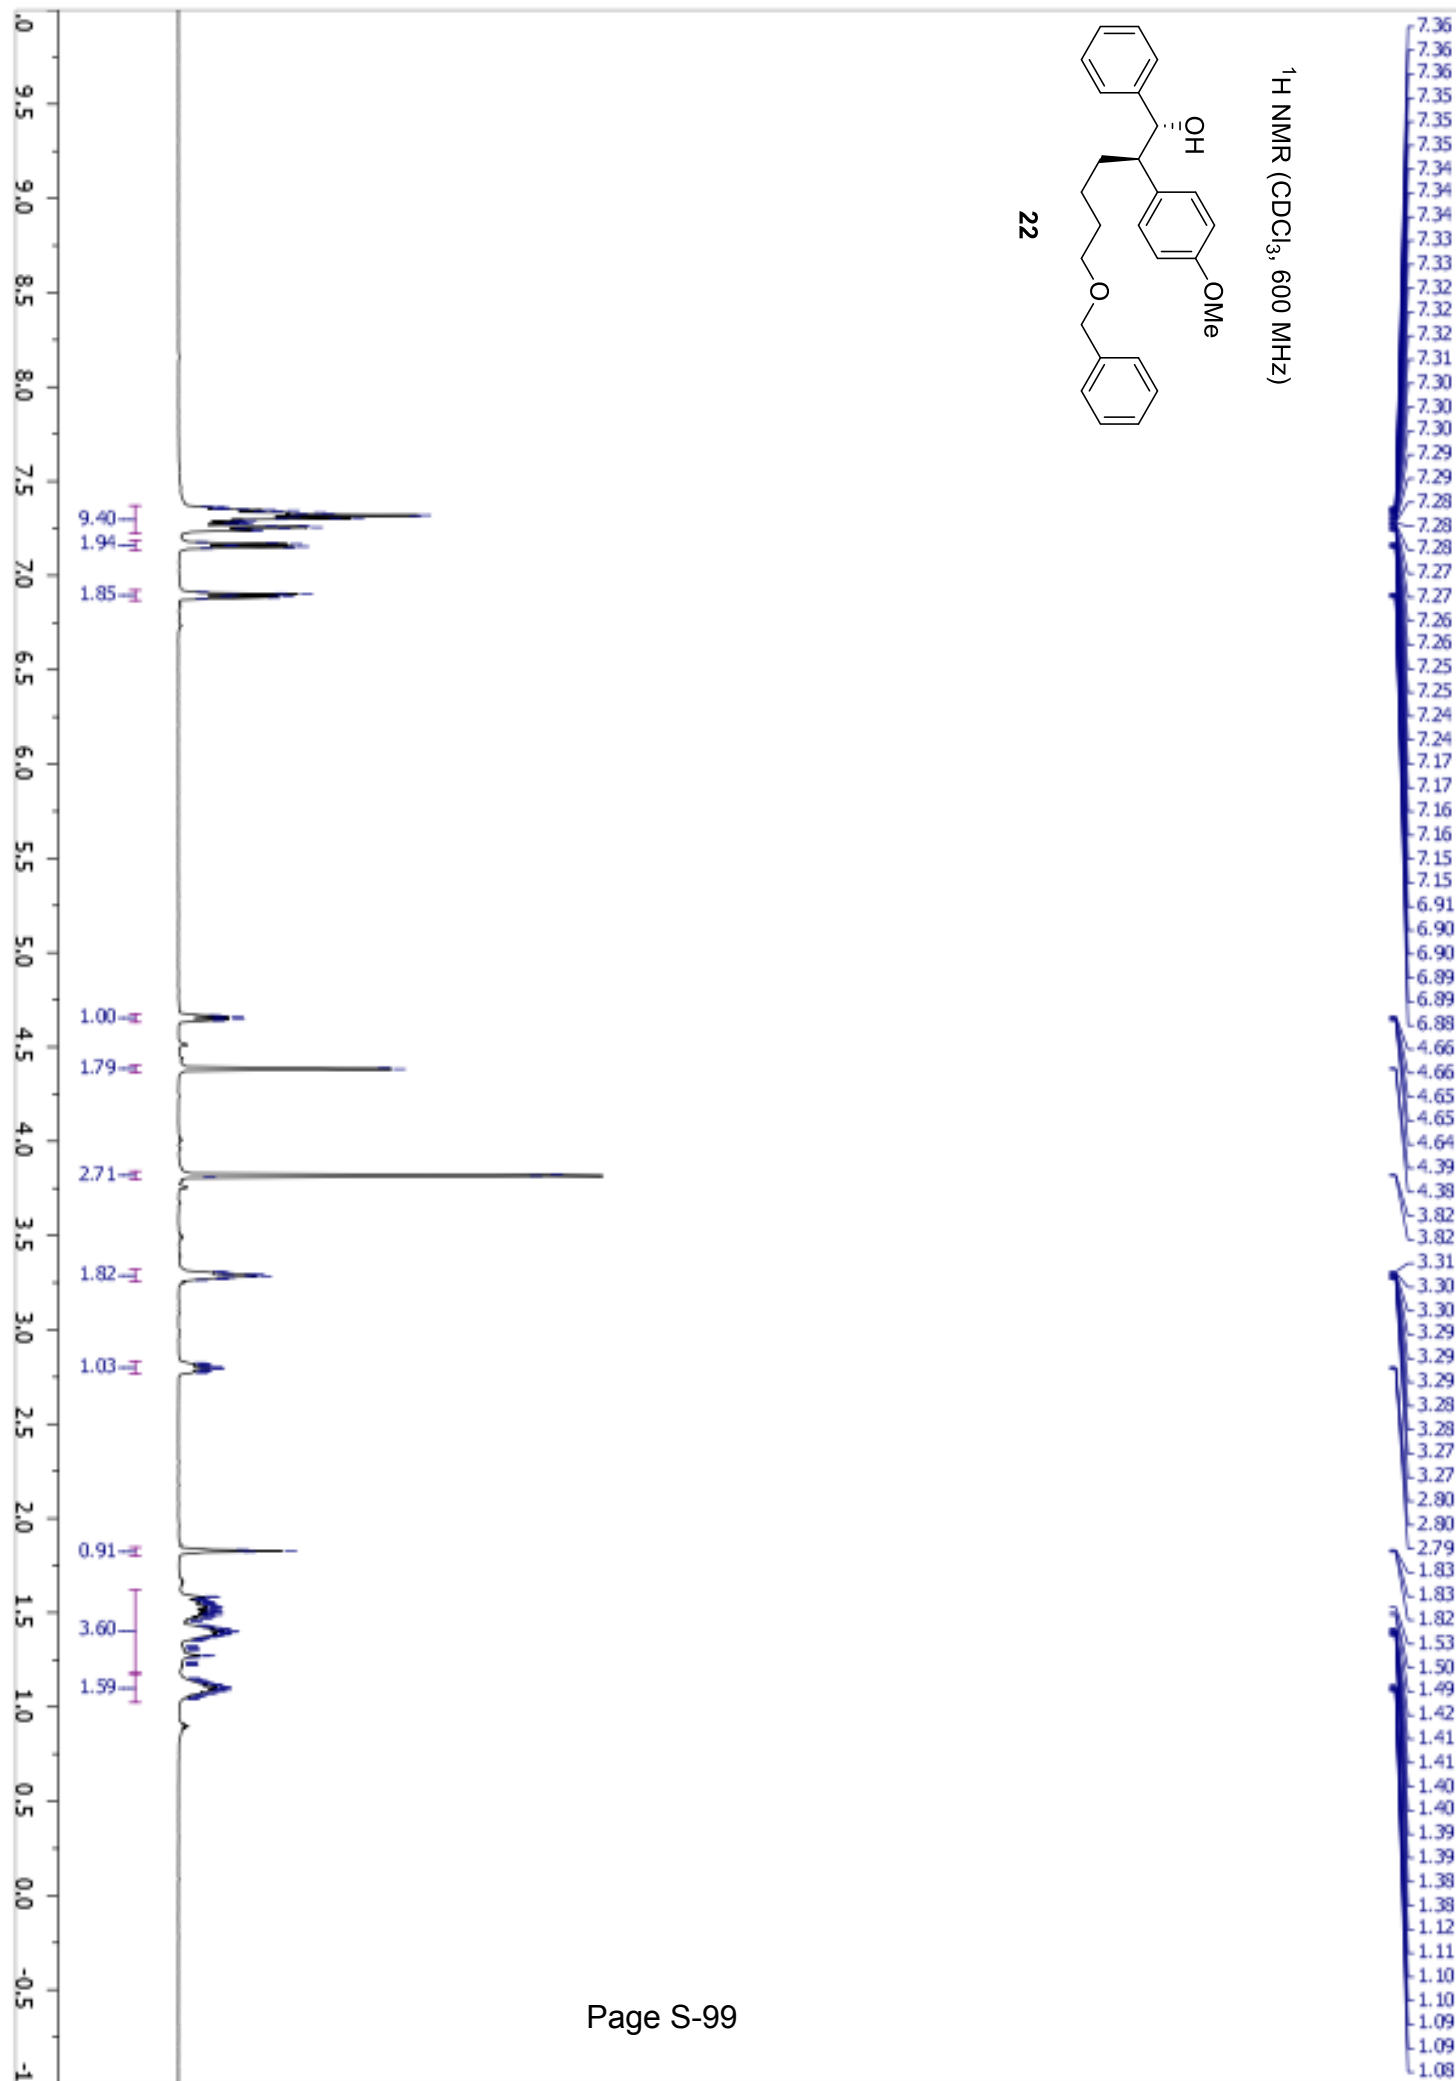

<sup>13</sup>C NMR (CDCl<sub>3</sub>, 151 MHz)

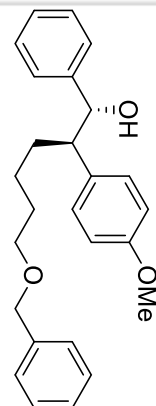

22

158.64

142.91

139.67

139.00

129.81

128.40

128.37

127.81

127.69

127.55

127.09

114.16

78.92

77.37

77.16

76.95

72.86

70.24

55.33

53.53

31.89

29.56

24.00

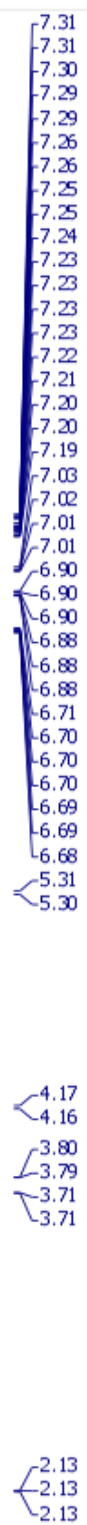

<sup>1</sup>H NMR (CDCl<sub>3</sub>, 500 MHz)

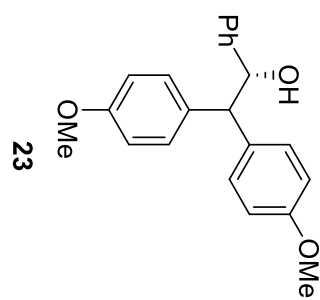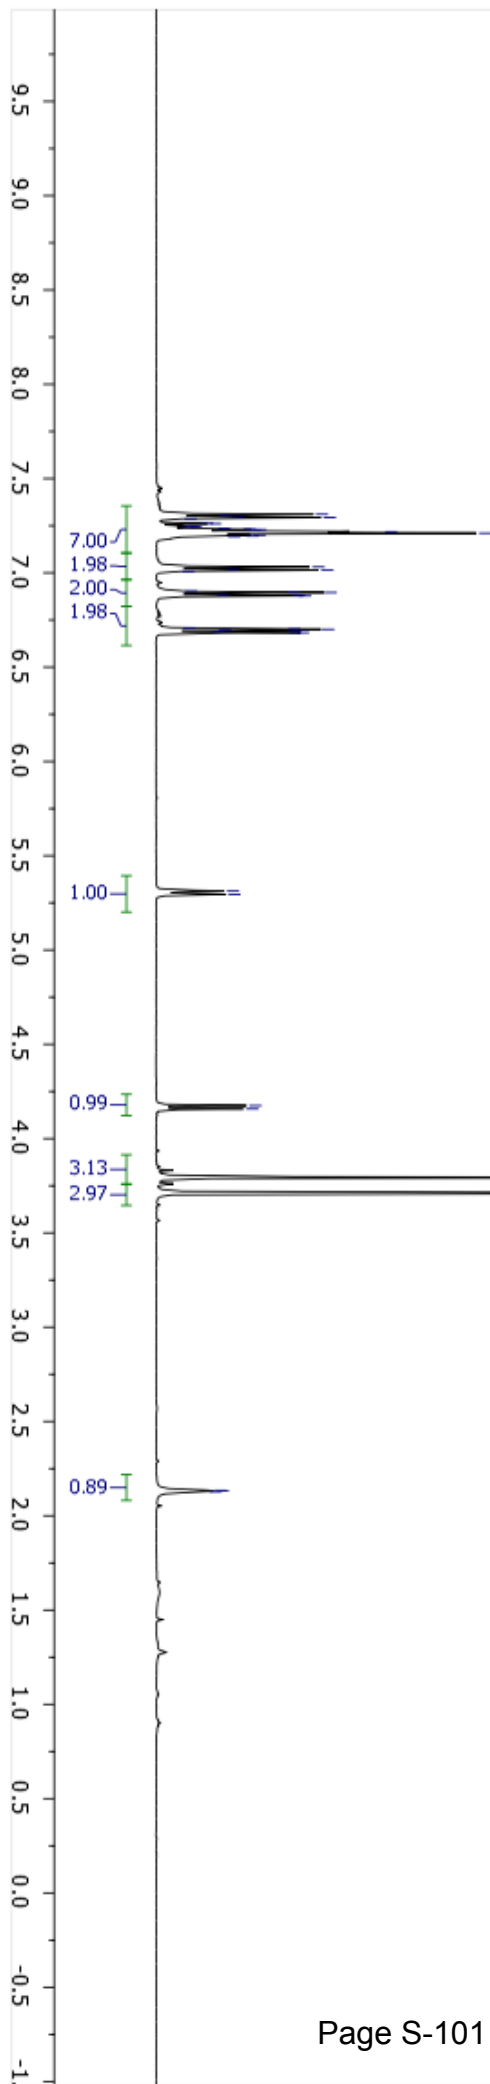

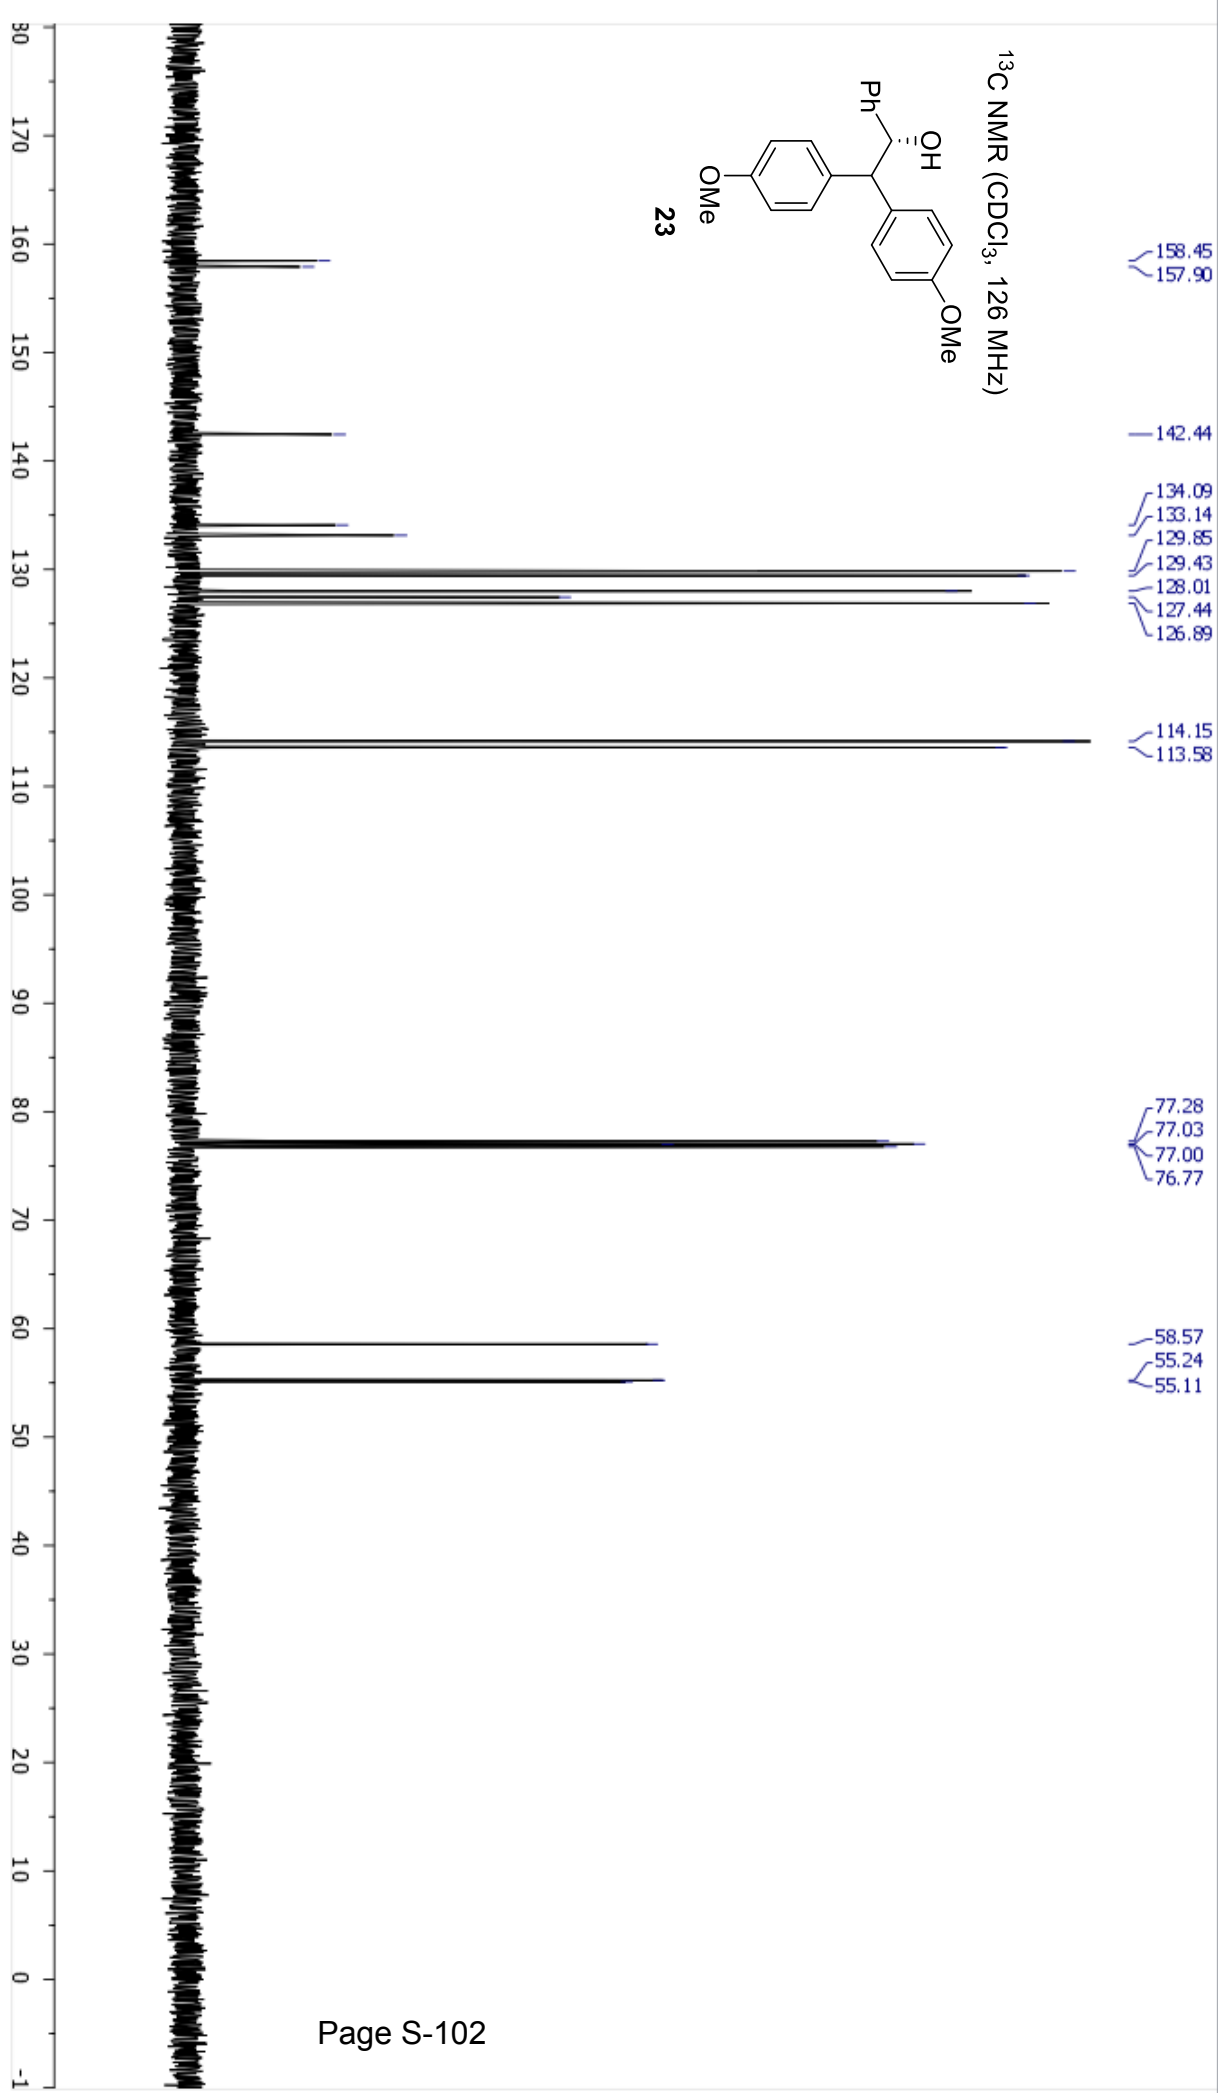

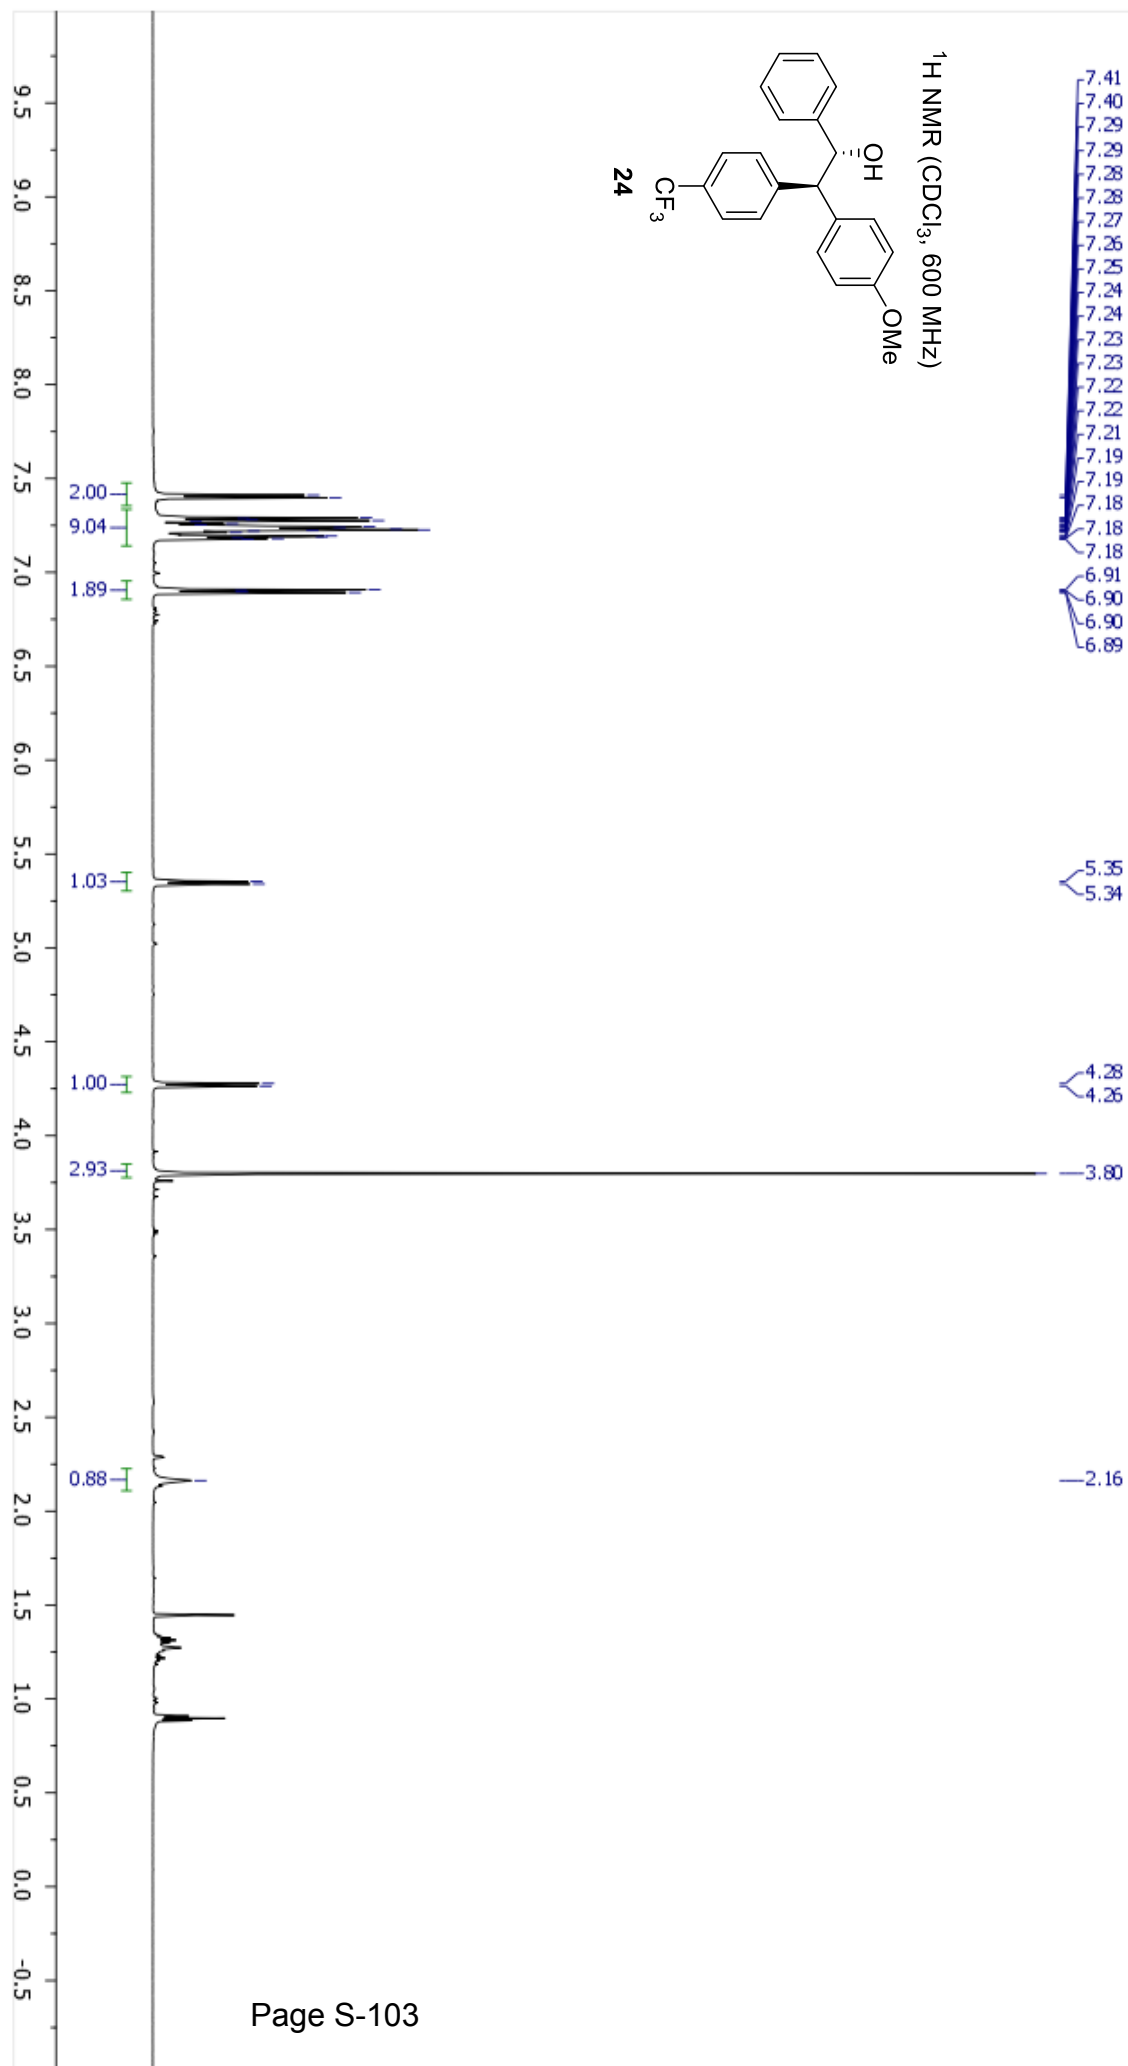

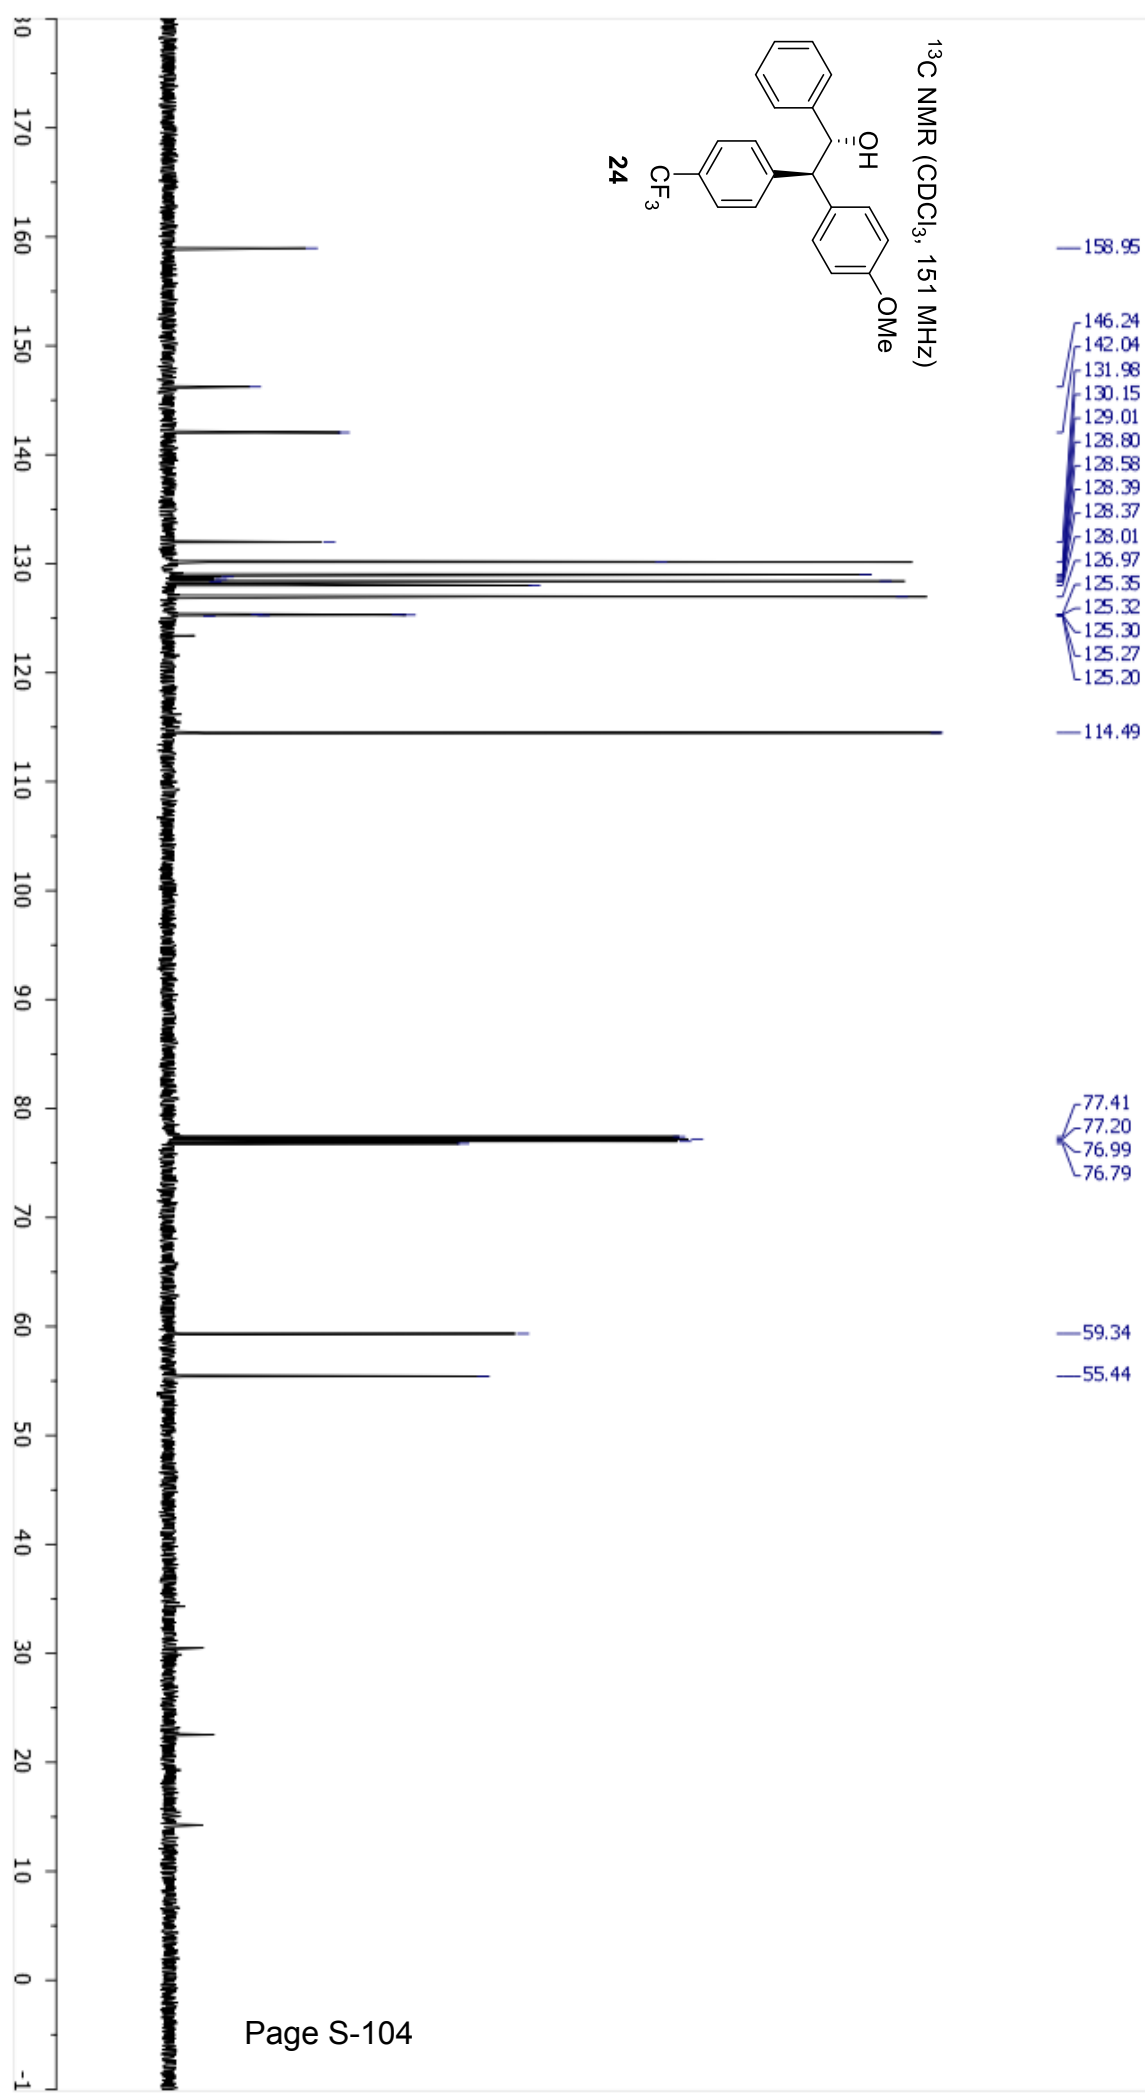



7.30  
7.30  
7.29  
7.28  
7.26  
7.25  
7.24  
7.24  
7.23  
7.23  
7.23  
7.22  
7.22  
7.22  
7.21  
7.21  
7.20  
7.19  
7.19  
7.18  
7.18  
7.17  
7.07  
7.06  
7.06  
7.05  
7.04  
7.04  
6.91  
6.91  
6.90  
6.89  
6.89  
6.85  
6.84  
6.84  
6.83  
6.83  
6.82  
6.82  
6.81  
5.30  
5.28  
5.28  
4.18  
3.80  
2.14

<sup>1</sup>H NMR (CDCl<sub>3</sub>, 500 MHz)

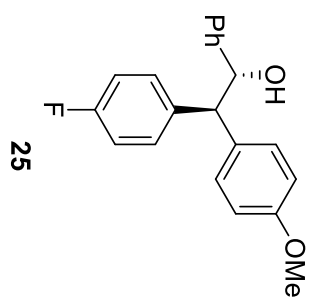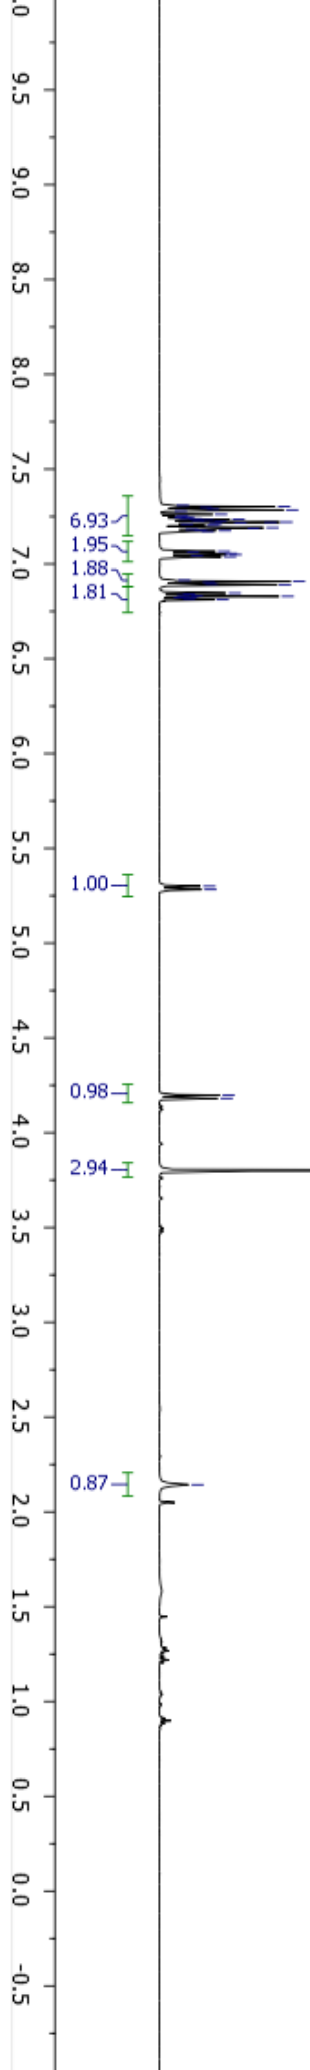

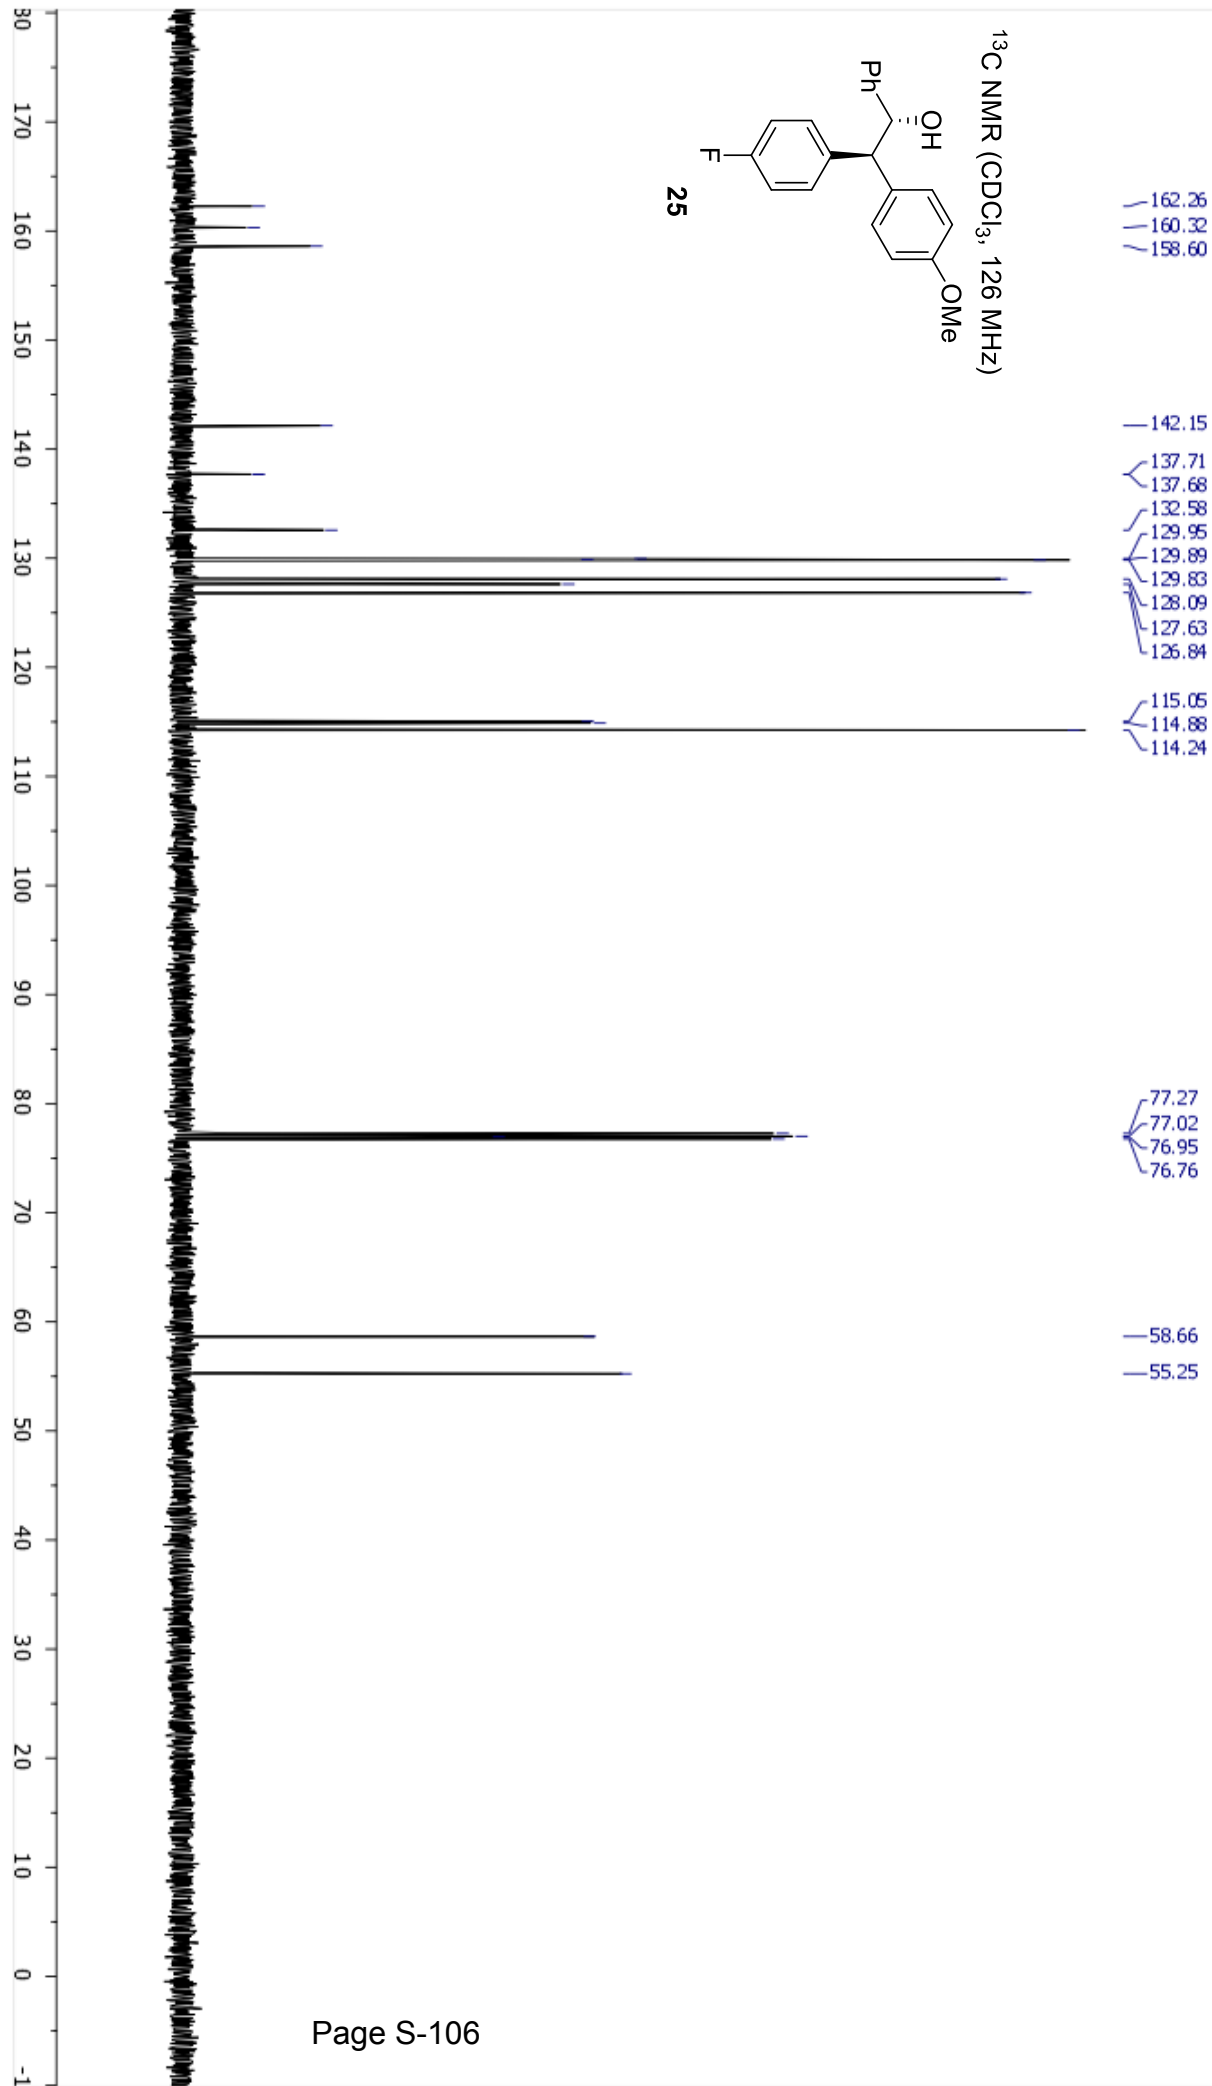

7.73  
7.71  
7.54  
7.52  
7.43  
7.42  
7.40  
7.39  
7.26  
7.26  
7.16  
7.14  
7.14  
7.10  
7.09  
7.01  
7.01  
7.01  
7.00  
6.99  
6.96  
6.96  
6.95  
6.94  
6.93  
6.93  
6.19  
6.18  
6.18

4.26  
4.24

3.61  
3.60

3.16  
3.14

1.56  
1.54  
1.53

<sup>1</sup>H NMR (CDCl<sub>3</sub>, 500 MHz)

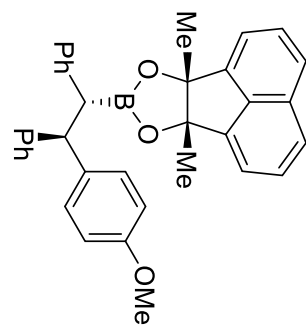

26

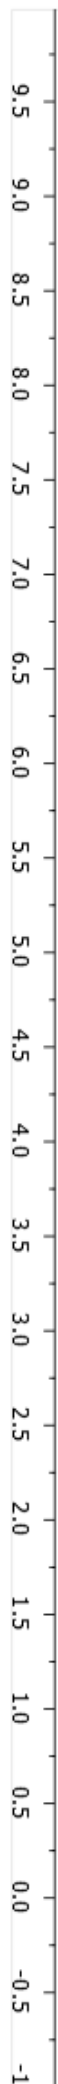

1.87  
1.98  
1.96  
2.00  
1.98  
2.91  
4.85

1.88

1.00

2.96

1.00

6.94

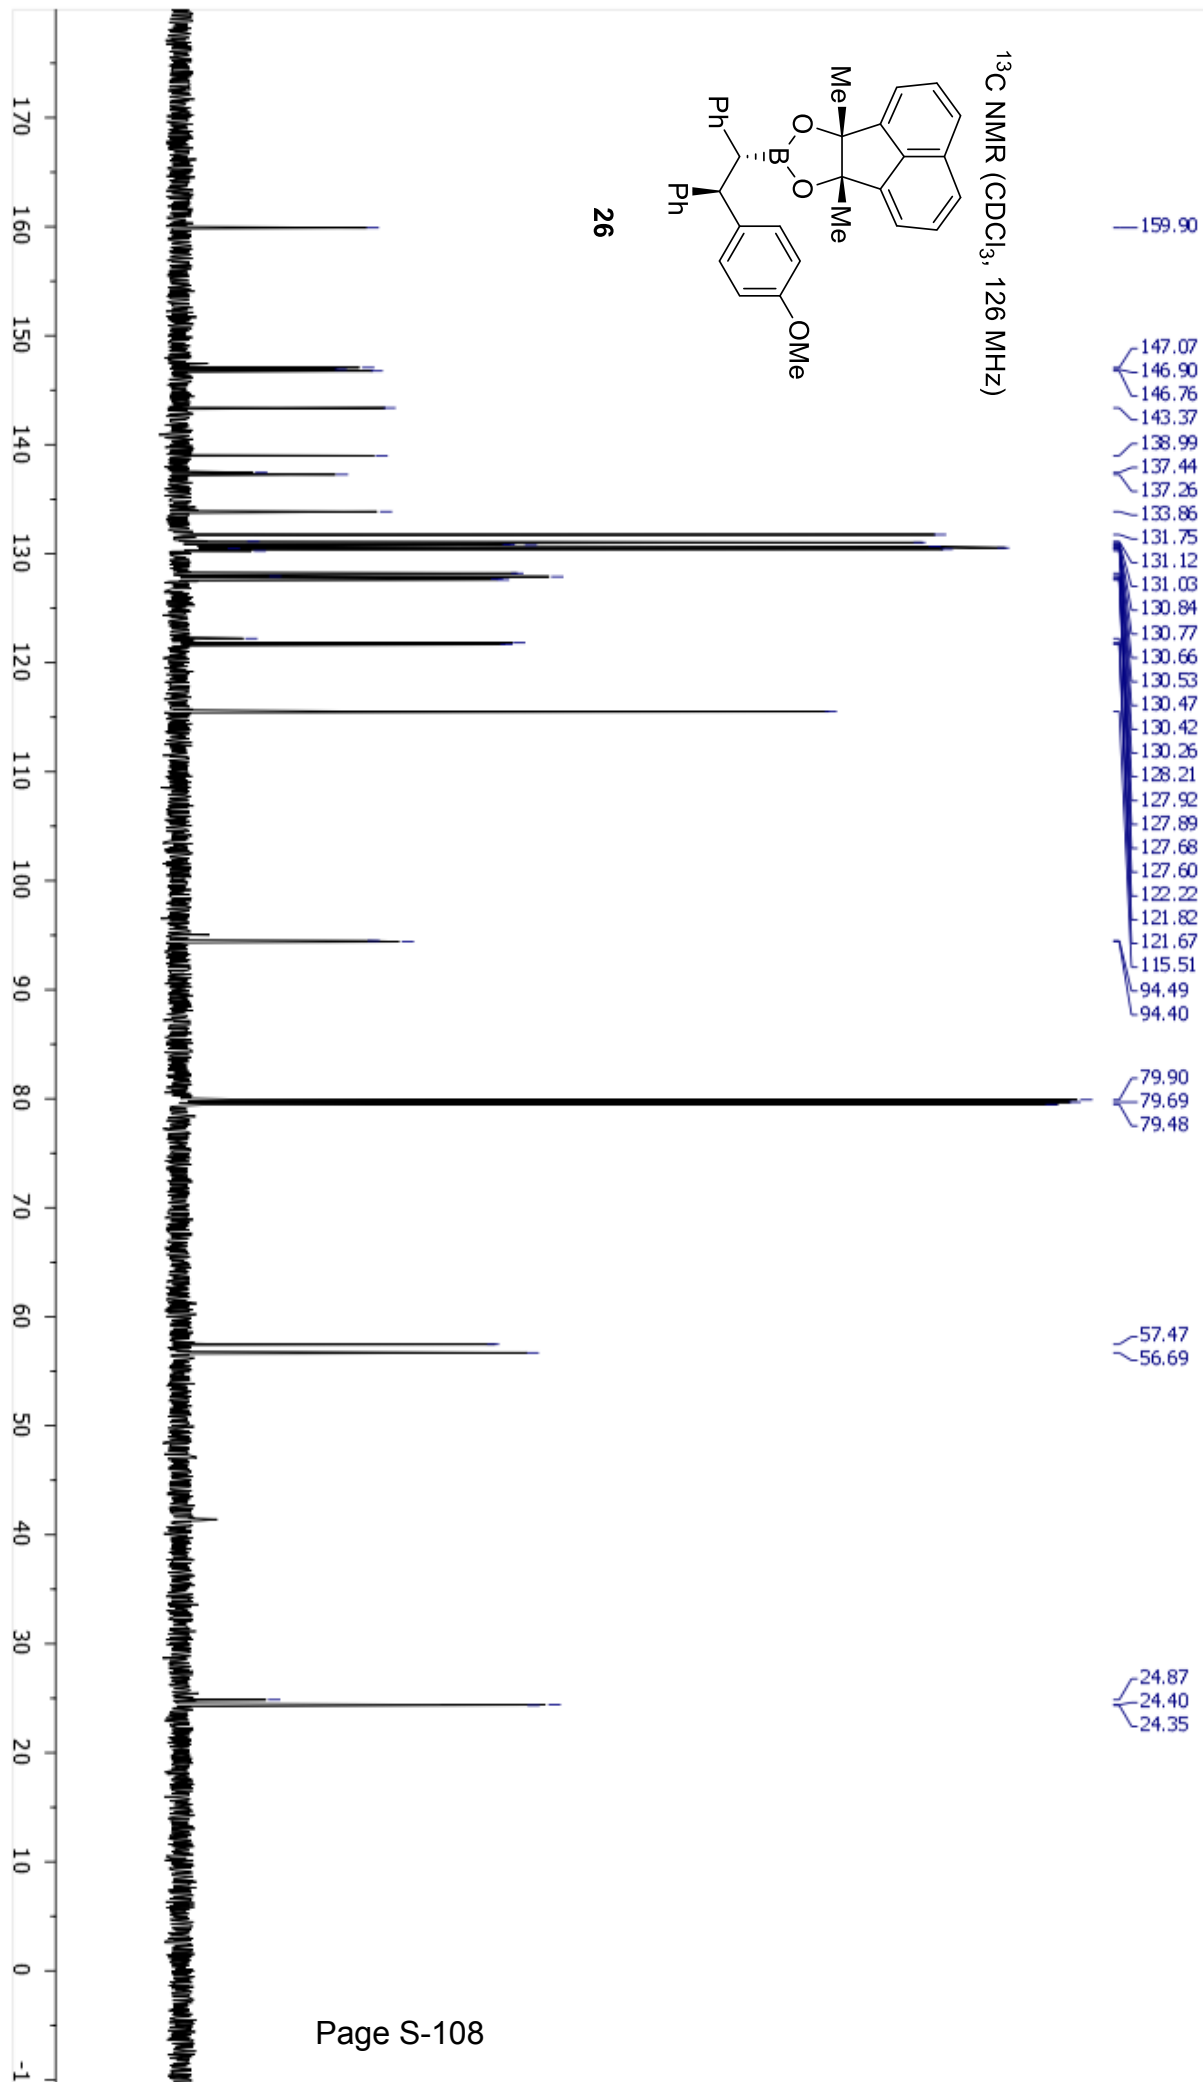

7.26  
7.19  
7.18  
7.18  
7.17  
7.17  
7.17  
7.16  
7.15  
7.15  
7.15  
7.14  
7.14  
7.13  
7.13  
7.12  
7.12  
7.09  
7.09  
7.09  
7.08  
7.08  
7.08  
7.07  
7.07  
7.07  
7.06  
6.84  
6.83  
5.41  
4.86  
4.18  
4.16  
3.78  
1.32

$^1\text{H}$  NMR ( $\text{CDCl}_3$ , 500 MHz)

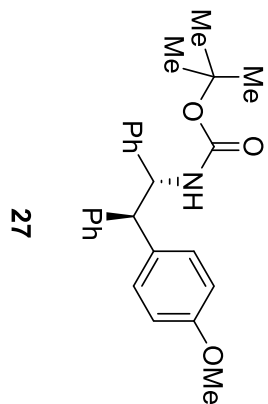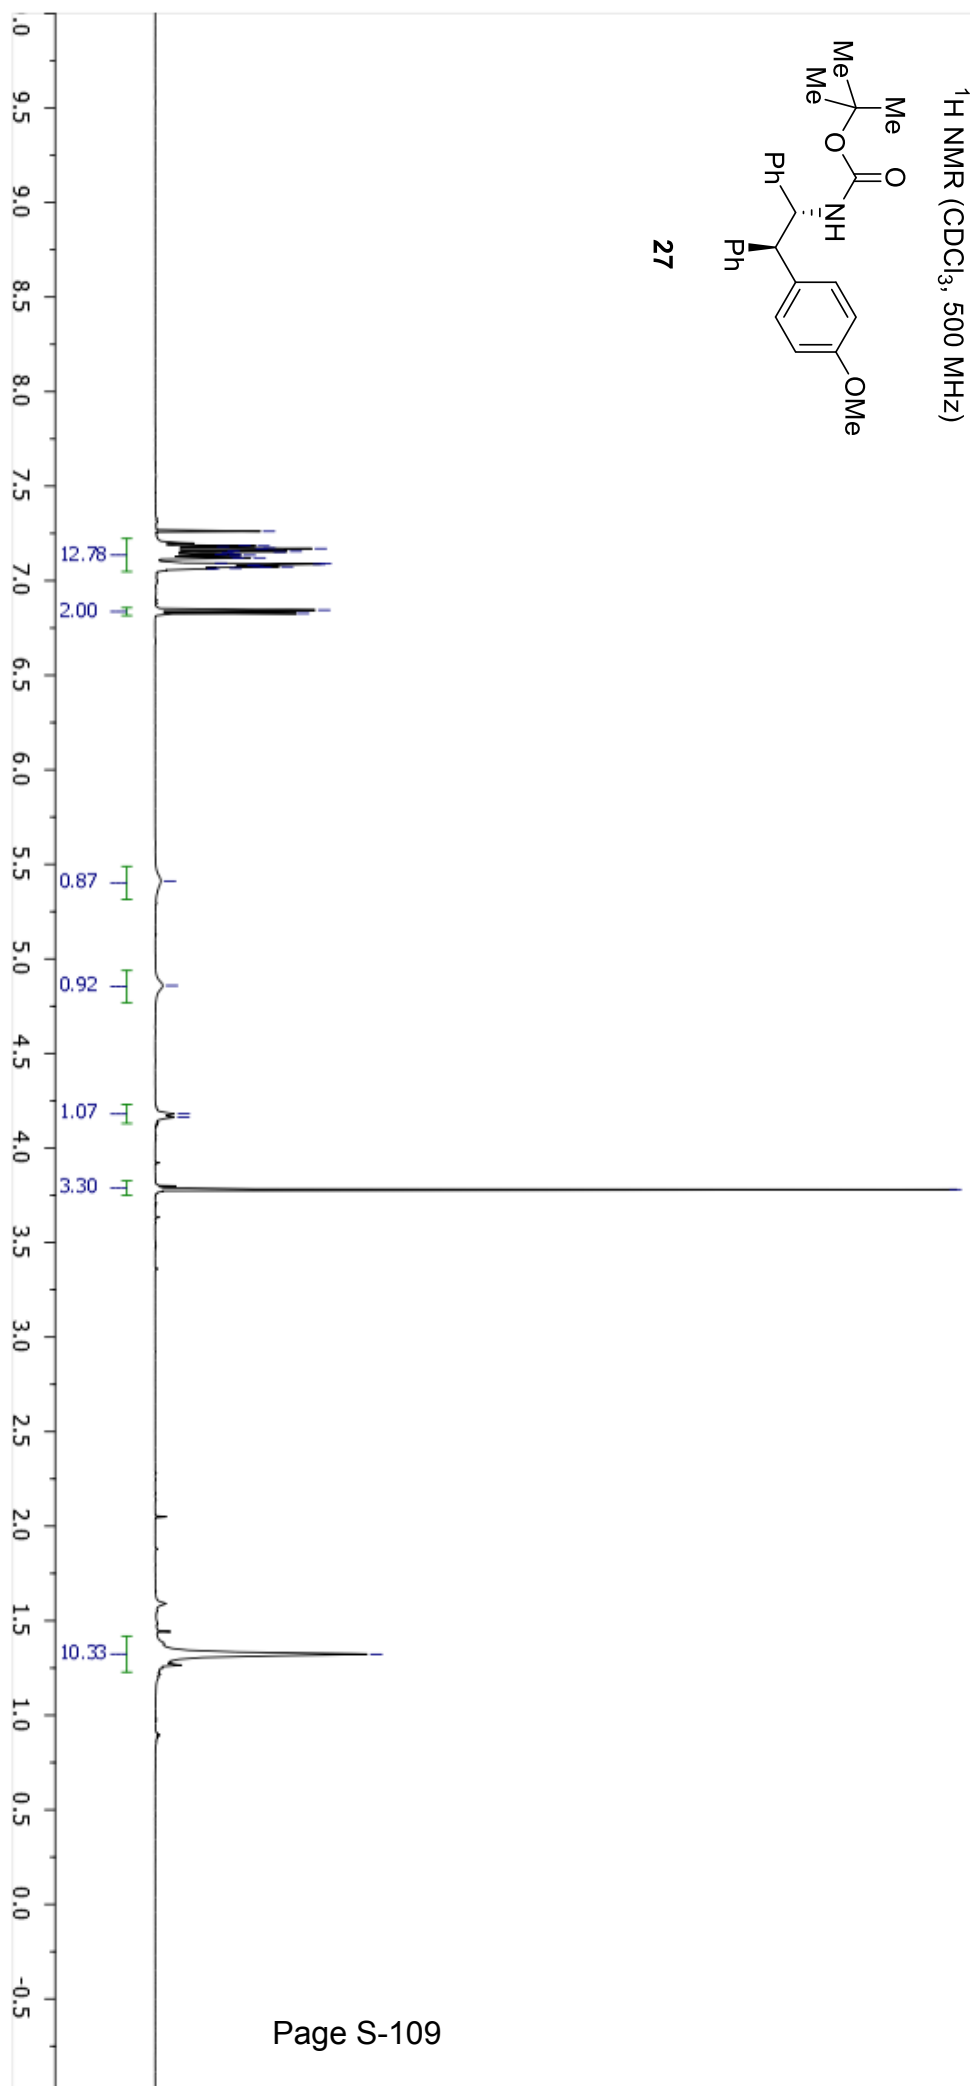

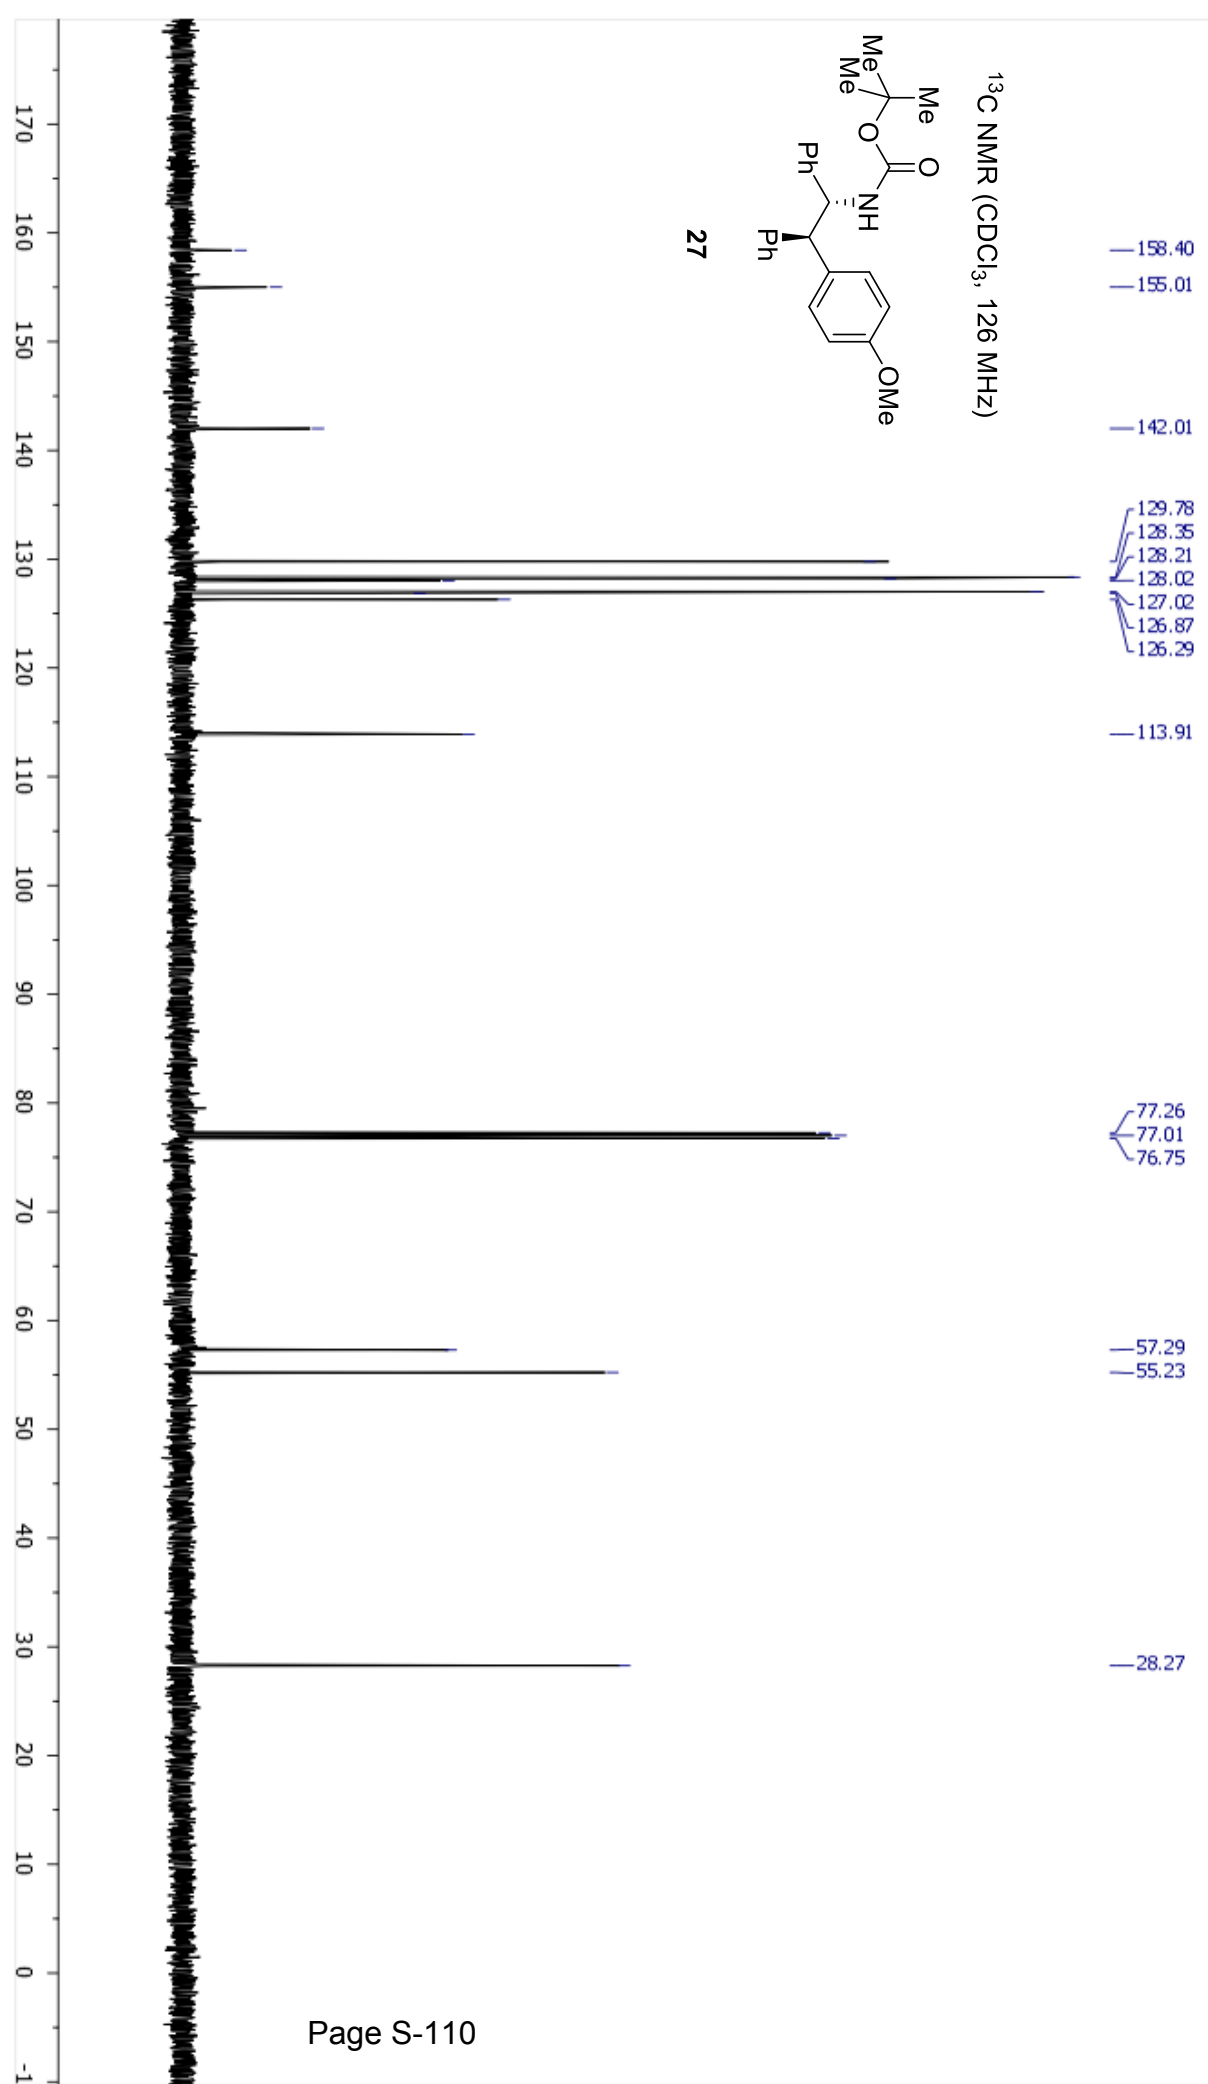

<sup>1</sup>H NMR (CDCl<sub>3</sub>, 500 MHz)

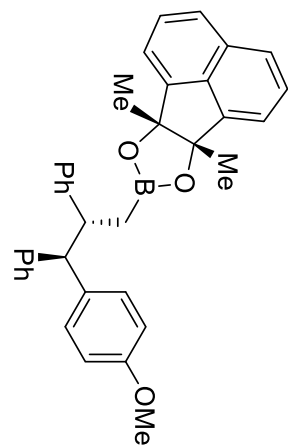

28

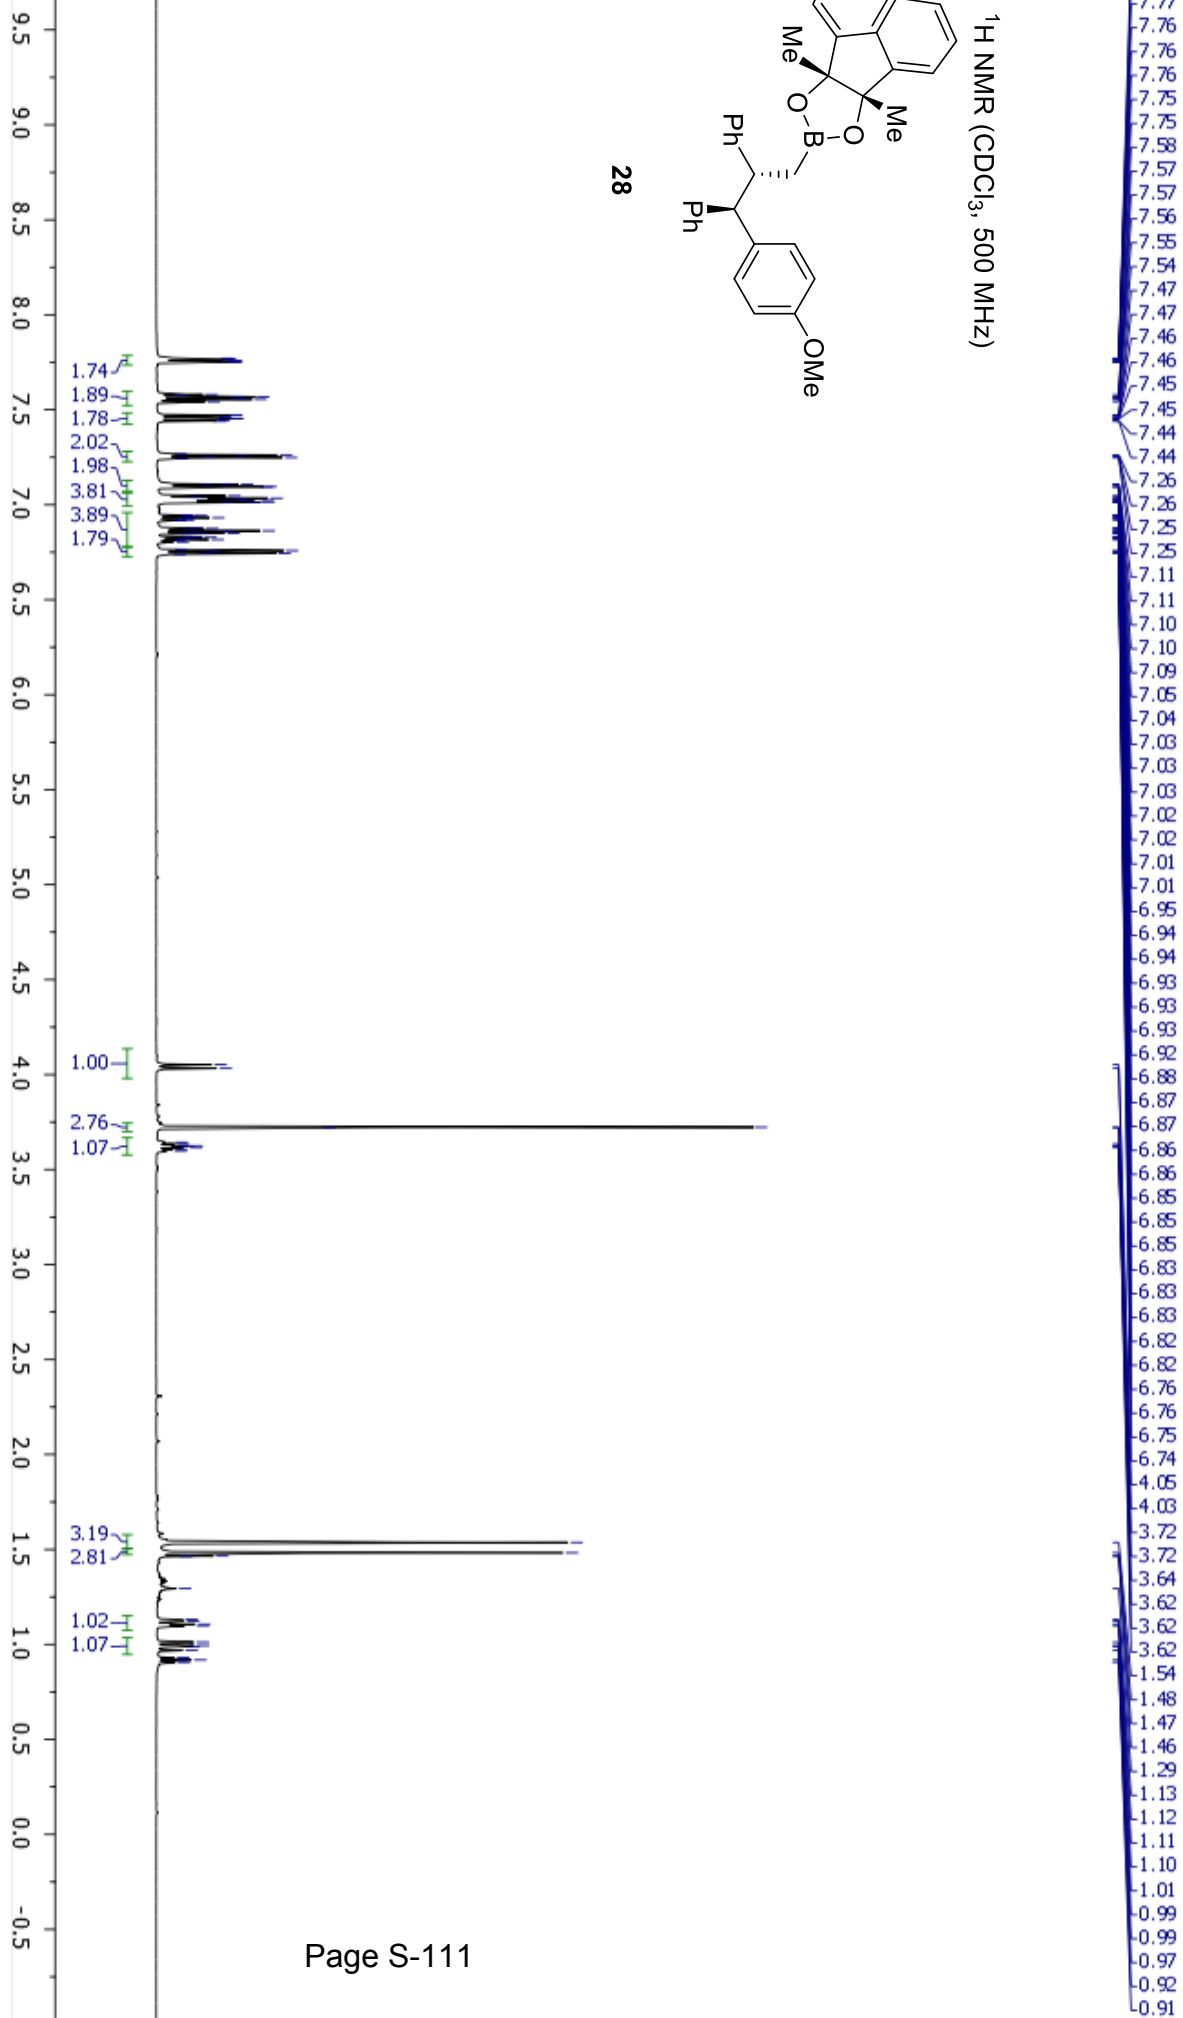

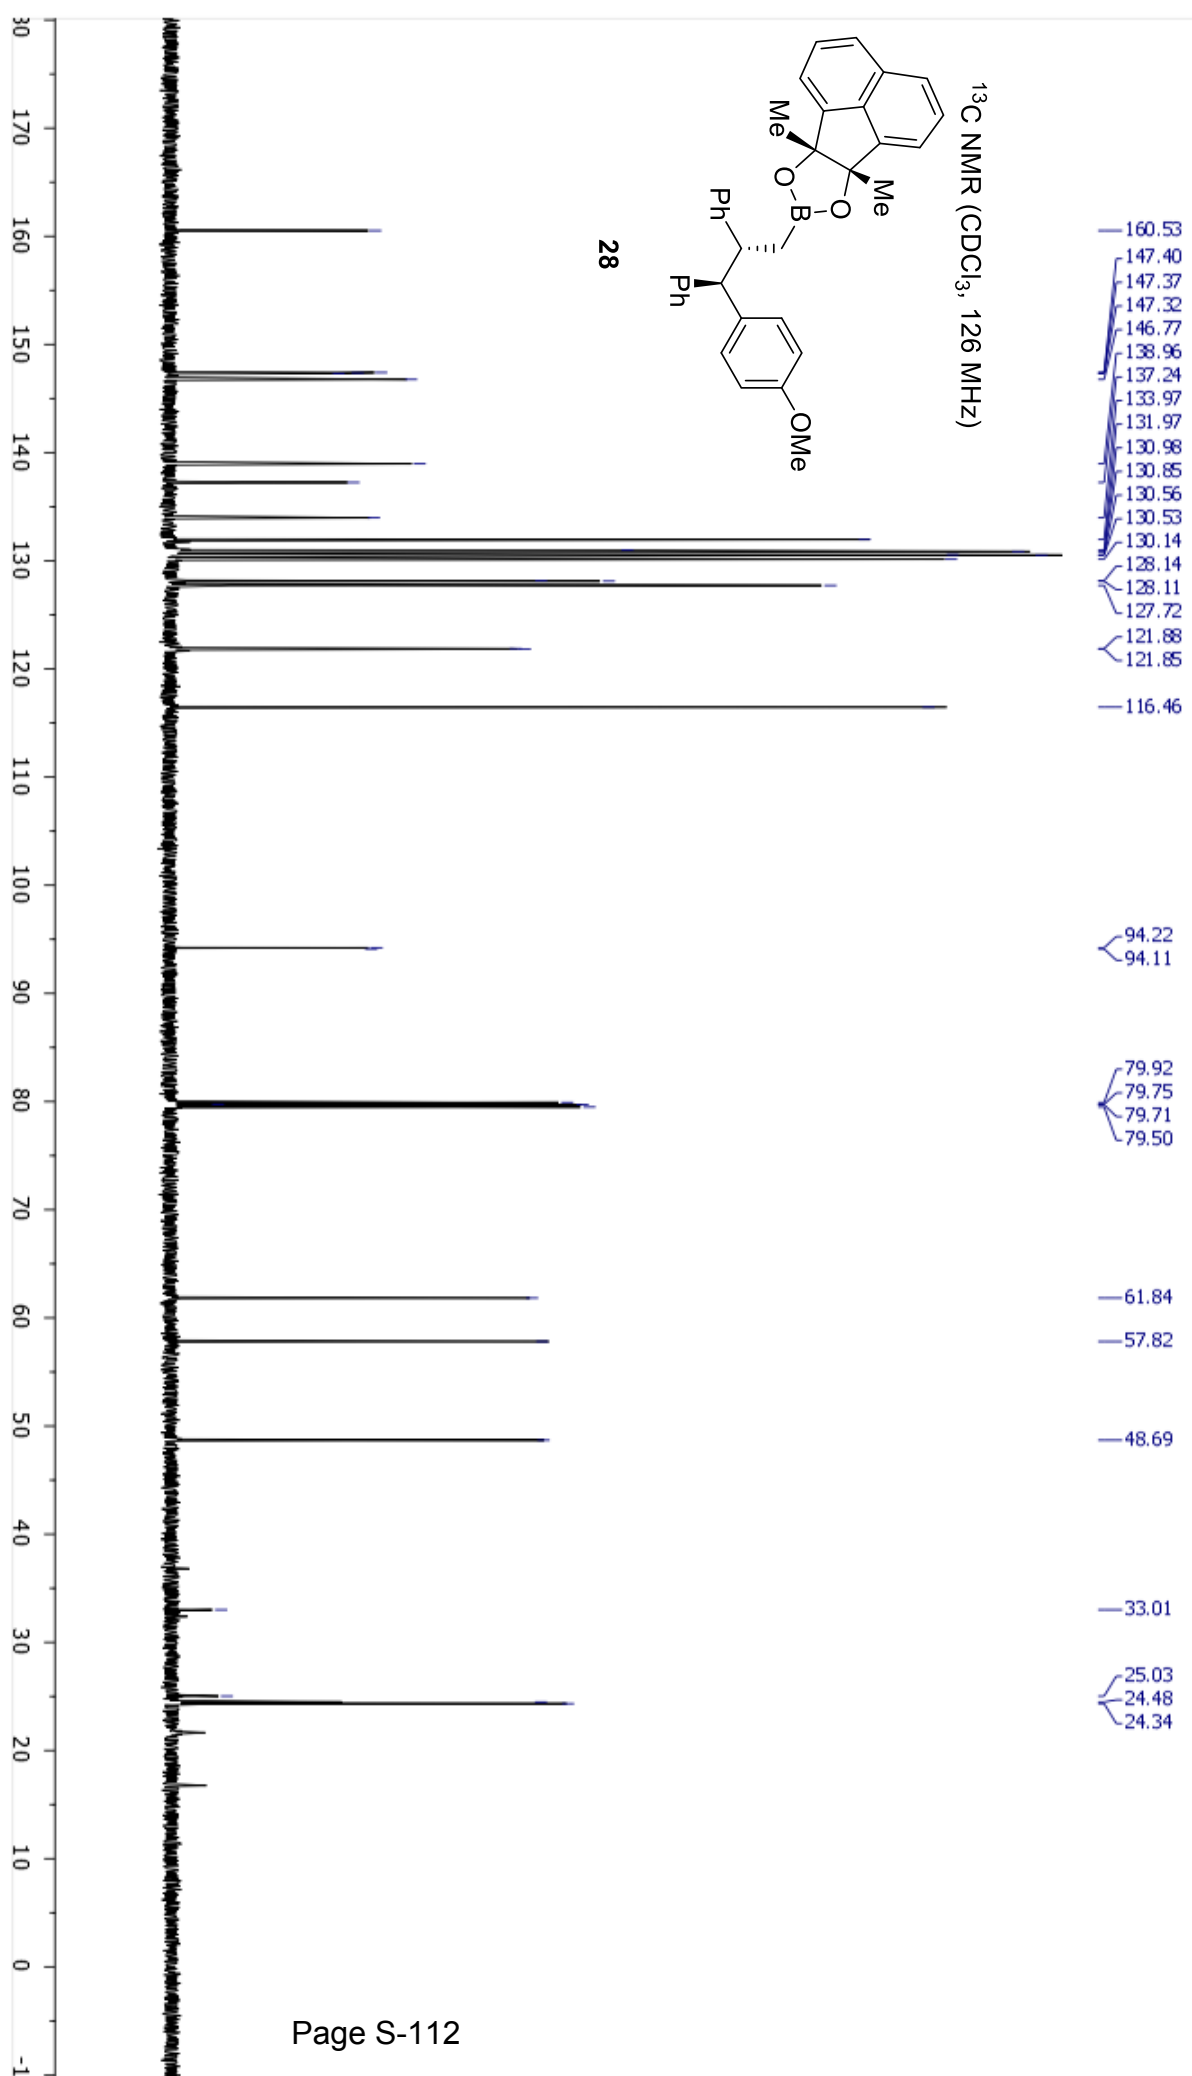



<sup>1</sup>H NMR (CDCl<sub>3</sub>, 600 MHz)

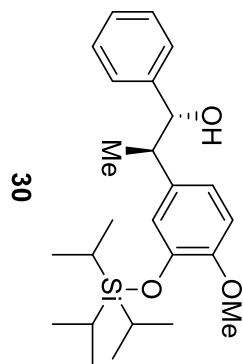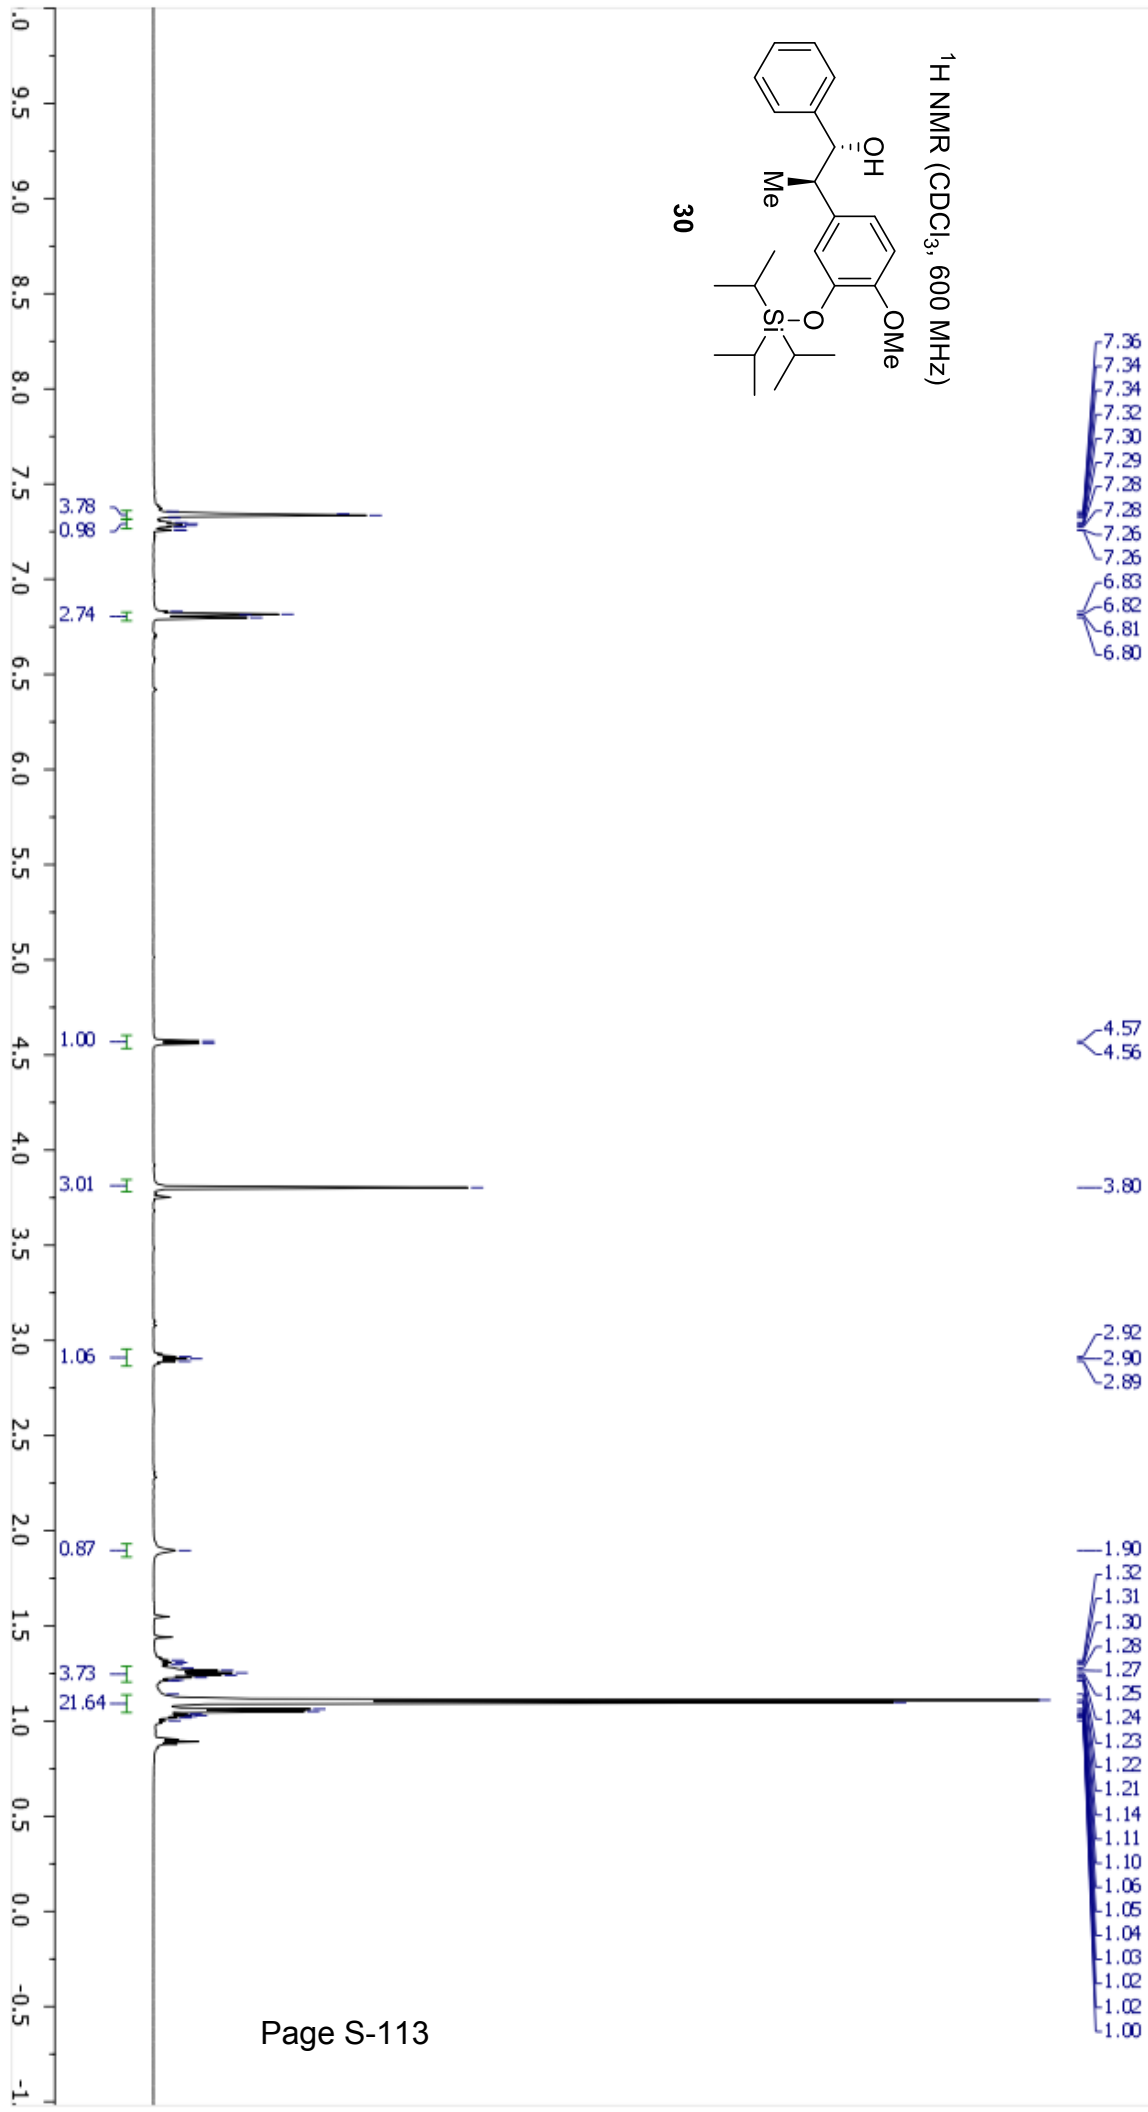

$^{13}\text{C}$  NMR ( $\text{CDCl}_3$ , 151 MHz)

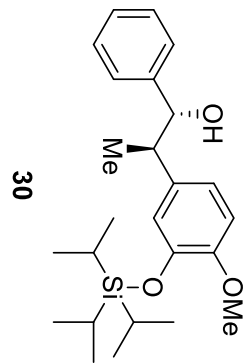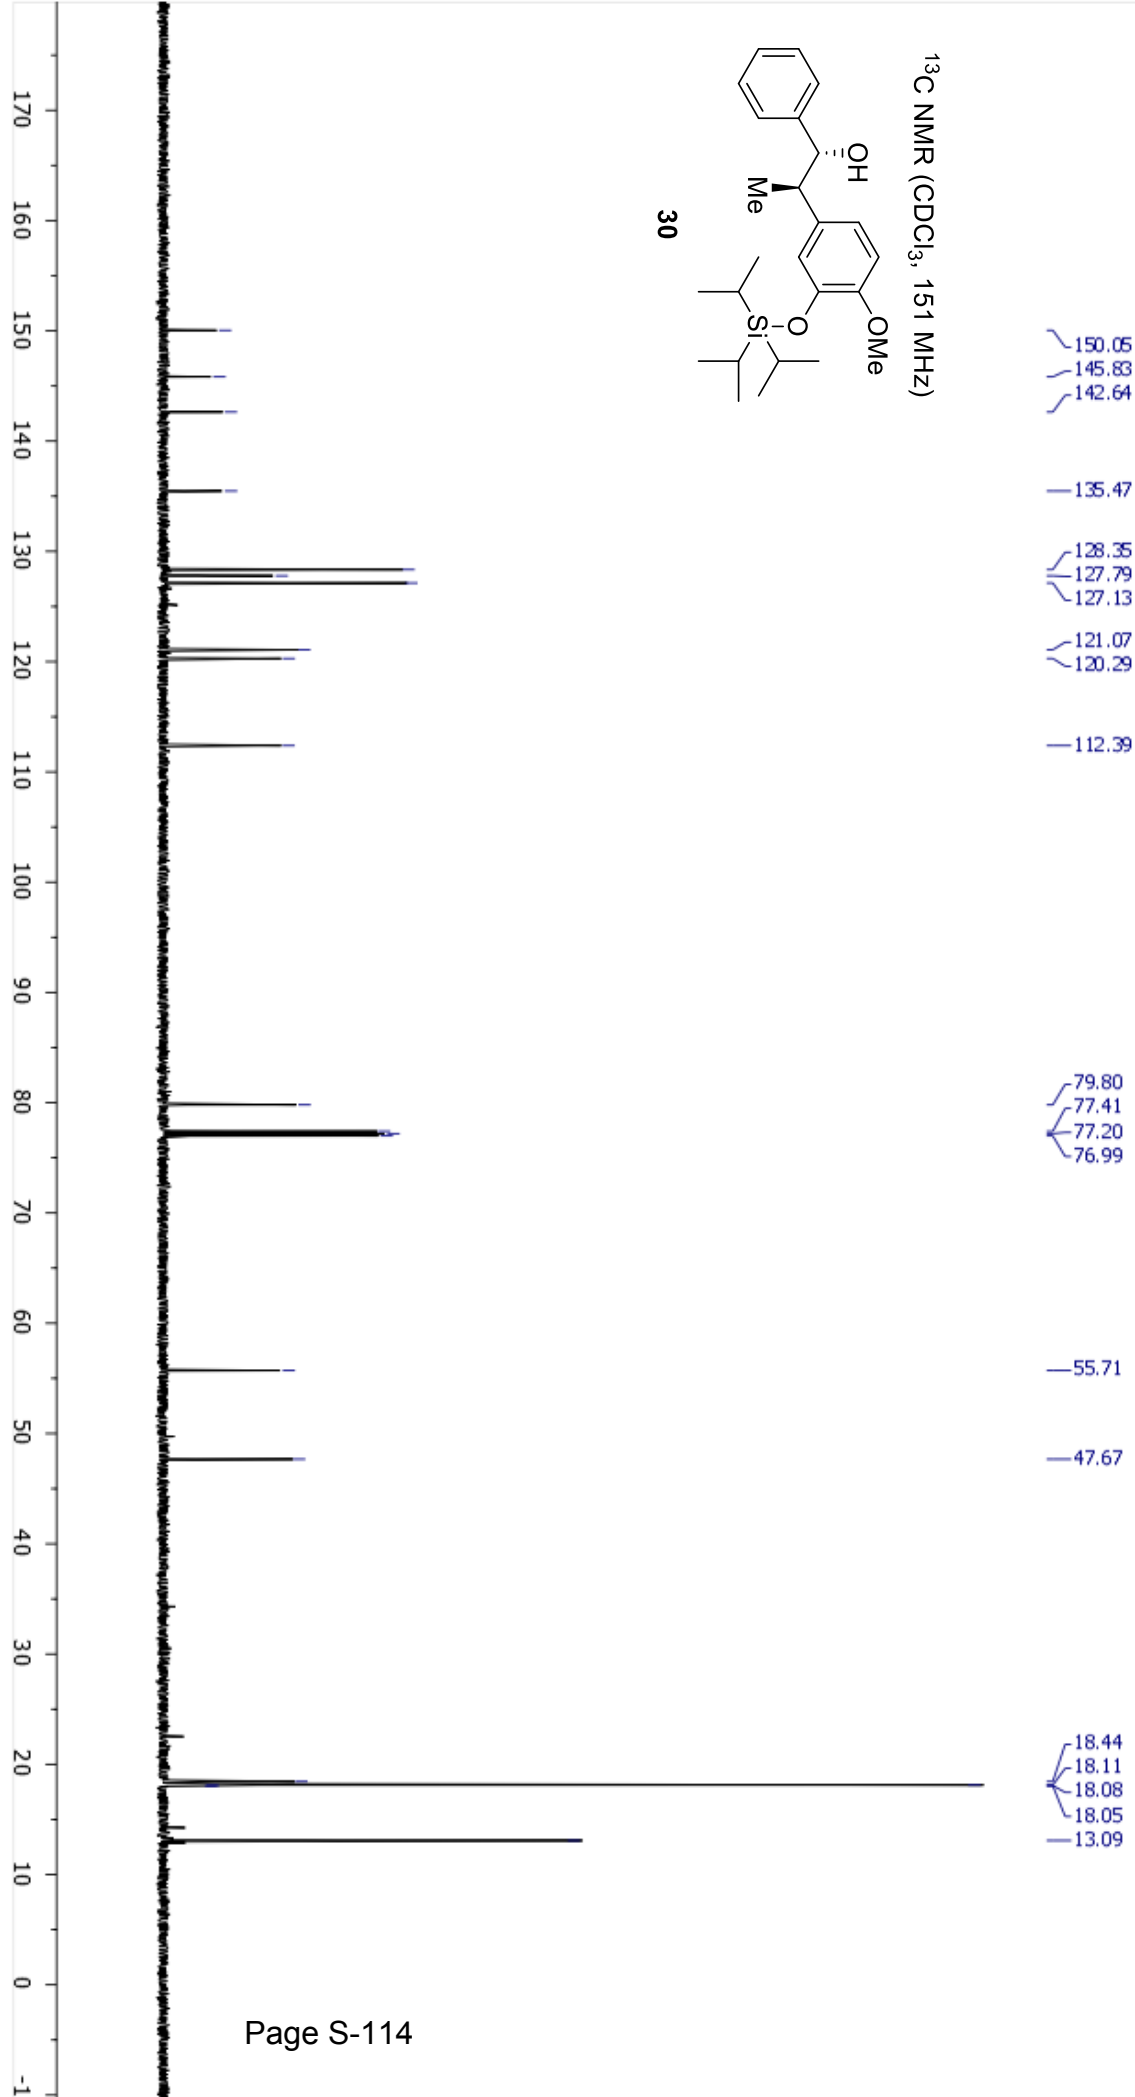

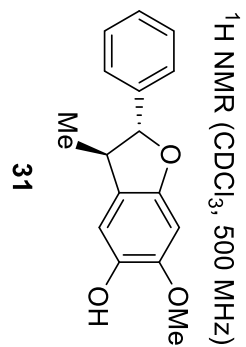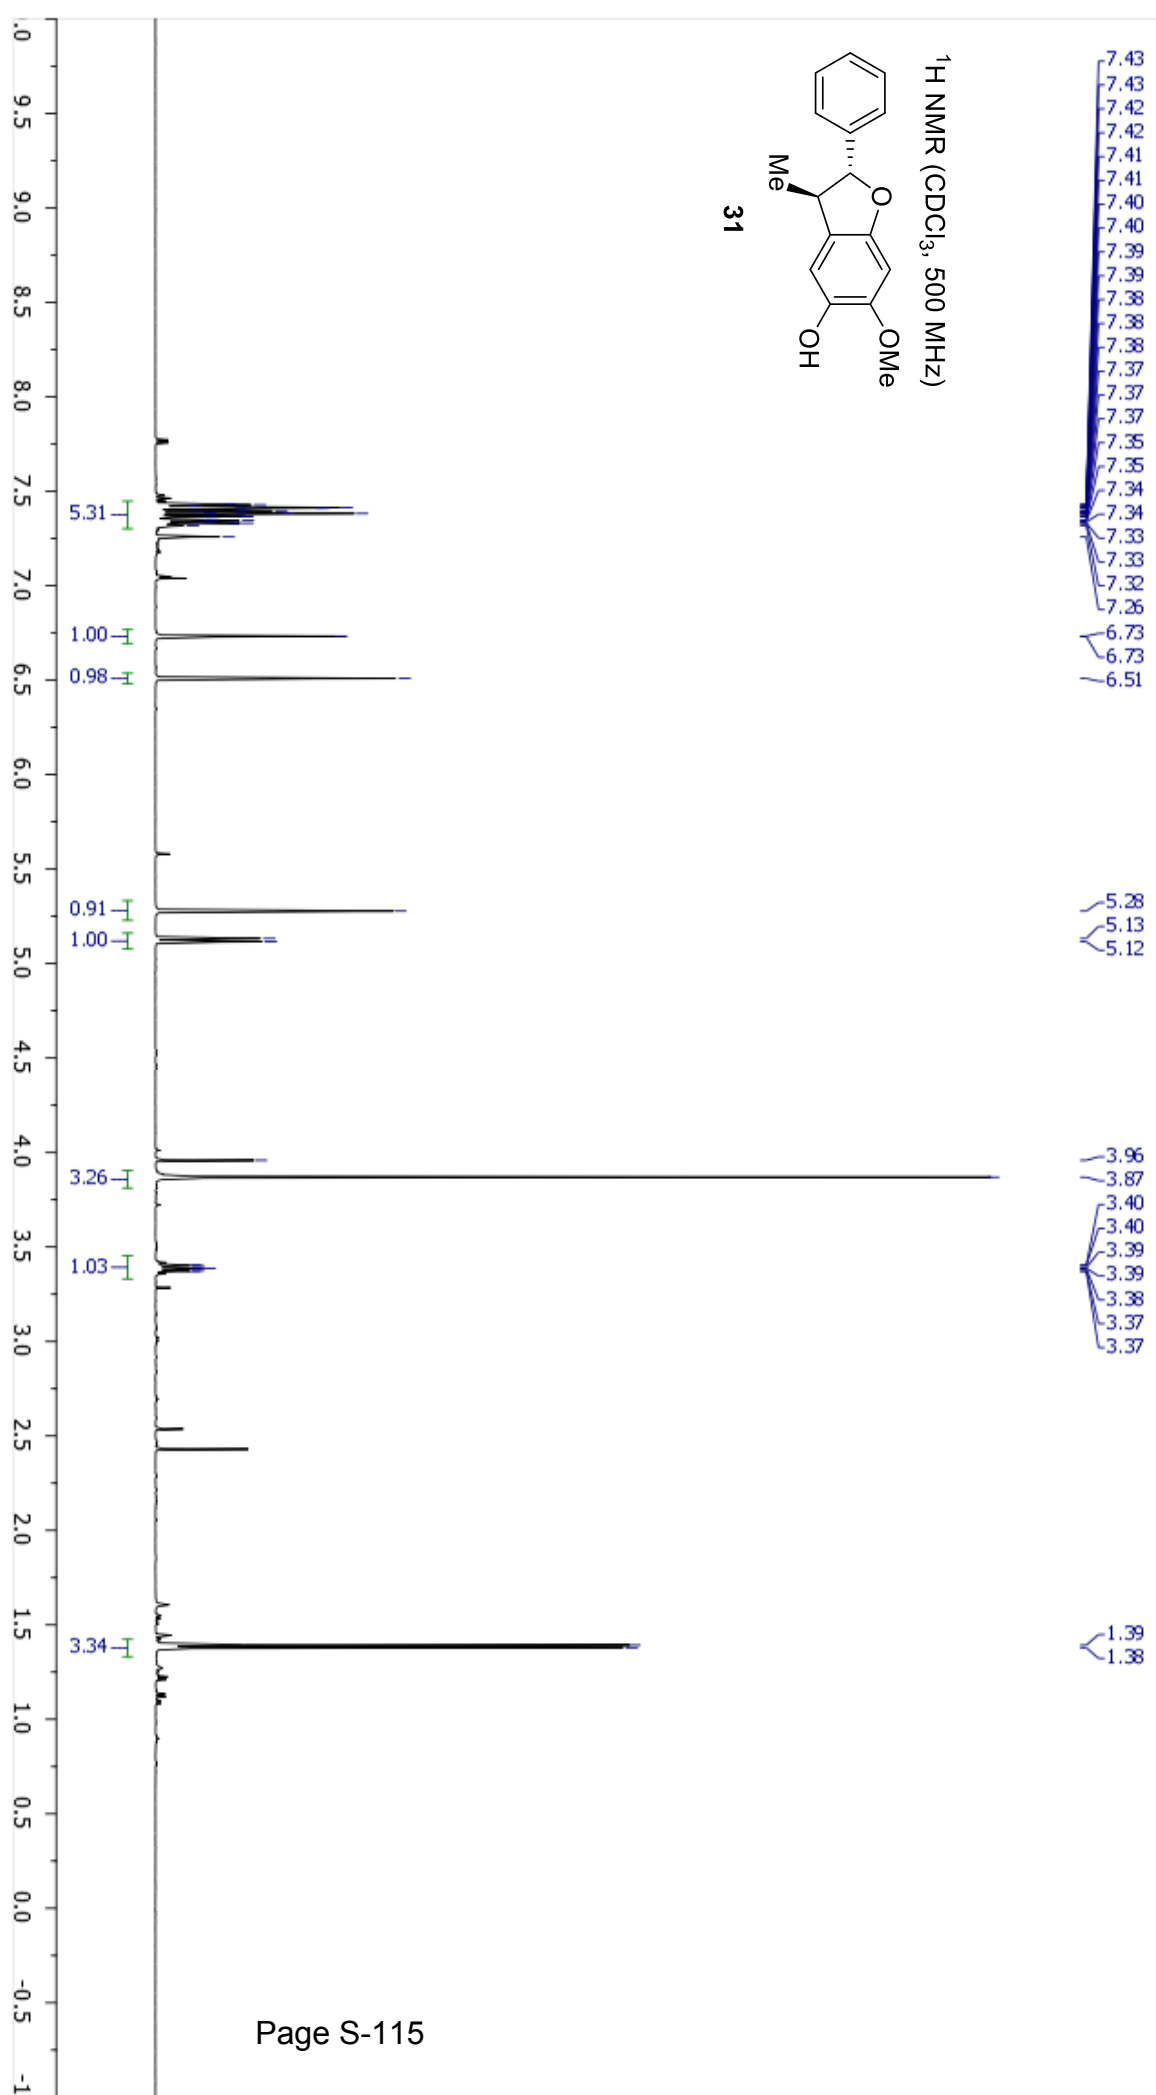

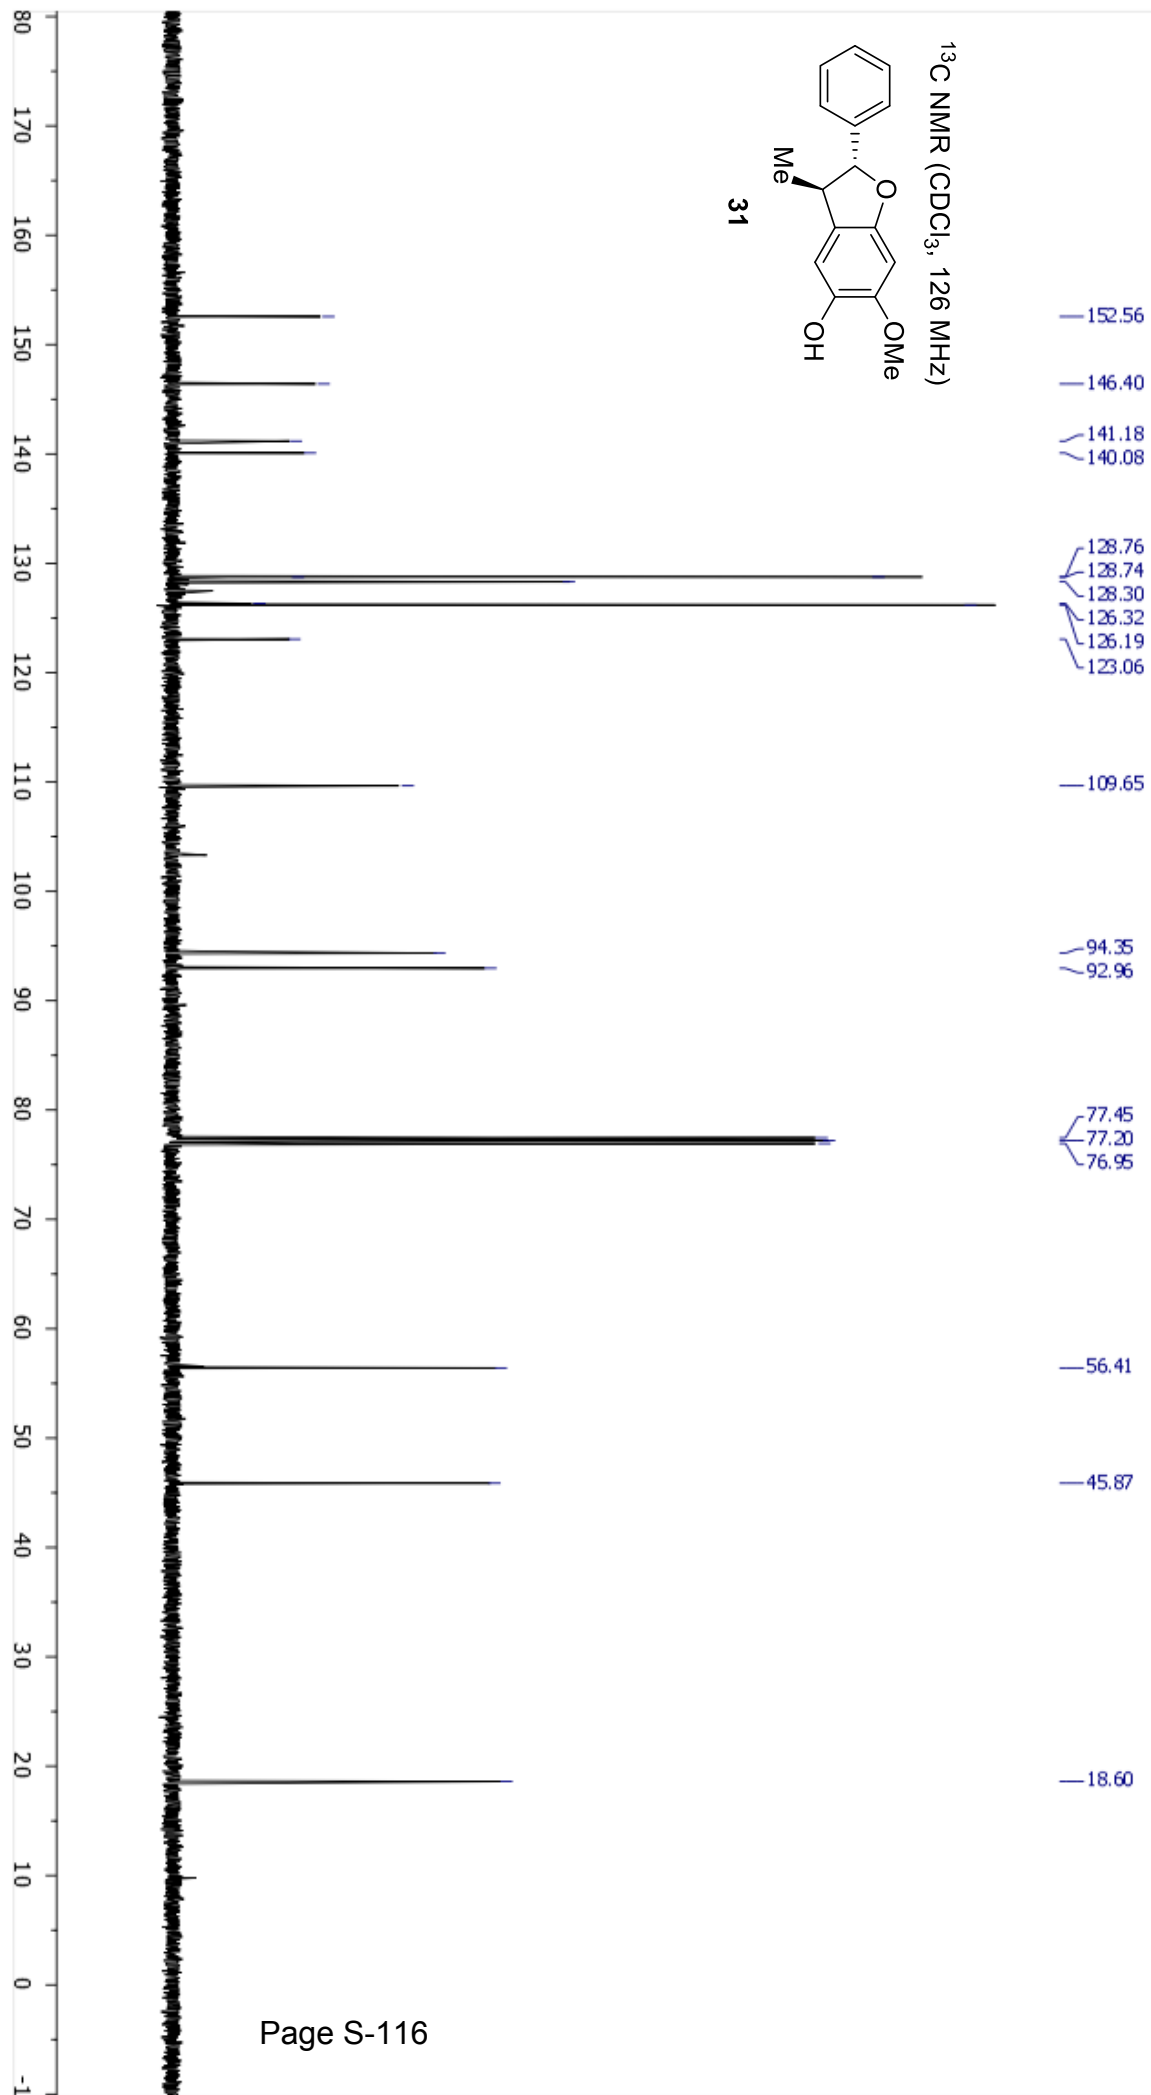

Table 1. Crystal data and structure refinement for C<sub>35</sub>H<sub>31</sub>BO<sub>3</sub>.

|                                   |                                             |                   |
|-----------------------------------|---------------------------------------------|-------------------|
| Identification code               | C35H31BO3                                   |                   |
| Empirical formula                 | C35 H31 B O3                                |                   |
| Formula weight                    | 510.41                                      |                   |
| Temperature                       | 100(2) K                                    |                   |
| Wavelength                        | 1.54178 Å                                   |                   |
| Crystal system                    | Triclinic                                   |                   |
| Space group                       | P1                                          |                   |
| Unit cell dimensions              | a = 10.1118(3) Å                            | α = 83.3770(10)°. |
|                                   | b = 11.8308(4) Å                            | β = 70.4740(10)°. |
|                                   | c = 12.5795(4) Å                            | γ = 72.0230(10)°. |
| Volume                            | 1348.98(8) Å <sup>3</sup>                   |                   |
| Z                                 | 2                                           |                   |
| Density (calculated)              | 1.257 Mg/m <sup>3</sup>                     |                   |
| Absorption coefficient            | 0.611 mm <sup>-1</sup>                      |                   |
| F(000)                            | 540                                         |                   |
| Crystal size                      | 0.600 x 0.560 x 0.480 mm <sup>3</sup>       |                   |
| Theta range for data collection   | 3.728 to 66.684°.                           |                   |
| Index ranges                      | -12 ≤ h ≤ 12, -14 ≤ k ≤ 14, -14 ≤ l ≤ 14    |                   |
| Reflections collected             | 25450                                       |                   |
| Independent reflections           | 9064 [R(int) = 0.0484]                      |                   |
| Completeness to theta = 66.684°   | 98.5 %                                      |                   |
| Absorption correction             | Semi-empirical from equivalents             |                   |
| Max. and min. transmission        | 0.7528 and 0.6878                           |                   |
| Refinement method                 | Full-matrix least-squares on F <sup>2</sup> |                   |
| Data / restraints / parameters    | 9064 / 3 / 709                              |                   |
| Goodness-of-fit on F <sup>2</sup> | 1.022                                       |                   |
| Final R indices [I > 2σ(I)]       | R1 = 0.0449, wR2 = 0.1164                   |                   |
| R indices (all data)              | R1 = 0.0450, wR2 = 0.1165                   |                   |
| Absolute structure parameter      | -0.16(14)                                   |                   |
| Extinction coefficient            | n/a                                         |                   |
| Largest diff. peak and hole       | 0.242 and -0.207 e.Å <sup>-3</sup>          |                   |

Table 2. Atomic coordinates ( $\times 10^4$ ) and equivalent isotropic displacement parameters ( $\text{\AA}^2 \times 10^3$ ) for C<sub>35</sub>H<sub>31</sub>BO<sub>3</sub>. U(eq) is defined as one third of the trace of the orthogonalized  $U^{ij}$  tensor.

|       | x        | y       | z        | U(eq) |
|-------|----------|---------|----------|-------|
| O(1)  | 4672(2)  | 8507(2) | 6018(2)  | 28(1) |
| O(2)  | 4074(2)  | 3215(2) | 8406(2)  | 16(1) |
| O(3)  | 5215(2)  | 2995(2) | 6498(2)  | 16(1) |
| B(1)  | 3926(3)  | 3316(2) | 7359(2)  | 15(1) |
| C(1)  | 4580(4)  | 9395(3) | 6731(3)  | 29(1) |
| C(2)  | 3893(3)  | 7698(3) | 6483(2)  | 22(1) |
| C(3)  | 4155(3)  | 6776(3) | 5788(2)  | 24(1) |
| C(4)  | 3429(3)  | 5910(2) | 6171(2)  | 20(1) |
| C(5)  | 2434(3)  | 5938(2) | 7248(2)  | 17(1) |
| C(6)  | 2195(3)  | 6869(3) | 7936(2)  | 24(1) |
| C(7)  | 2915(3)  | 7755(3) | 7556(3)  | 25(1) |
| C(8)  | 1550(3)  | 5039(2) | 7672(2)  | 15(1) |
| C(9)  | 2394(3)  | 3790(2) | 7145(2)  | 15(1) |
| C(10) | 1524(3)  | 2892(2) | 7575(2)  | 16(1) |
| C(11) | 1382(4)  | 2187(3) | 6836(3)  | 27(1) |
| C(12) | 639(4)   | 1334(3) | 7230(3)  | 35(1) |
| C(13) | 16(3)    | 1175(3) | 8371(3)  | 30(1) |
| C(14) | 133(3)   | 1874(3) | 9120(3)  | 27(1) |
| C(15) | 886(3)   | 2723(3) | 8725(2)  | 23(1) |
| C(16) | 56(3)    | 5519(2) | 7494(2)  | 14(1) |
| C(17) | -68(3)   | 5735(2) | 6408(2)  | 17(1) |
| C(18) | -1439(3) | 6192(2) | 6266(2)  | 22(1) |
| C(19) | -2694(3) | 6438(2) | 7193(3)  | 24(1) |
| C(20) | -2586(3) | 6229(2) | 8266(3)  | 23(1) |
| C(21) | -1214(3) | 5775(2) | 8411(2)  | 20(1) |
| C(22) | 5634(3)  | 2852(2) | 8288(2)  | 15(1) |
| C(23) | 6414(3)  | 2646(2) | 6972(2)  | 15(1) |
| C(24) | 6085(3)  | 1633(2) | 8817(2)  | 14(1) |
| C(25) | 5863(3)  | 1260(2) | 9918(2)  | 17(1) |
| C(26) | 6493(3)  | 46(3)   | 10149(2) | 23(1) |
| C(27) | 7314(3)  | -762(2) | 9304(2)  | 21(1) |

|       |          |          |         |       |
|-------|----------|----------|---------|-------|
| C(28) | 7579(3)  | -398(2)  | 8157(2) | 17(1) |
| C(29) | 8460(3)  | -1100(2) | 7193(2) | 20(1) |
| C(30) | 8637(3)  | -601(2)  | 6125(2) | 21(1) |
| C(31) | 7984(3)  | 620(2)   | 5944(2) | 18(1) |
| C(32) | 7149(3)  | 1316(2)  | 6867(2) | 15(1) |
| C(33) | 6940(3)  | 809(2)   | 7950(2) | 15(1) |
| C(34) | 5932(3)  | 3813(2)  | 8795(2) | 21(1) |
| C(35) | 7470(3)  | 3368(2)  | 6381(2) | 22(1) |
| O(4)  | 5748(2)  | 1425(2)  | 2607(2) | 25(1) |
| O(5)  | 4948(2)  | 6967(2)  | 3036(2) | 19(1) |
| O(6)  | 5674(2)  | 6822(2)  | 1110(2) | 17(1) |
| B(2)  | 6079(3)  | 6697(3)  | 2057(2) | 17(1) |
| C(36) | 4884(3)  | 968(3)   | 3601(3) | 30(1) |
| C(37) | 6230(3)  | 2349(2)  | 2721(2) | 19(1) |
| C(38) | 7034(3)  | 2789(3)  | 1721(2) | 24(1) |
| C(39) | 7596(3)  | 3714(3)  | 1735(2) | 23(1) |
| C(40) | 7367(3)  | 4231(2)  | 2749(2) | 17(1) |
| C(41) | 6527(3)  | 3804(3)  | 3732(2) | 21(1) |
| C(42) | 5957(3)  | 2872(3)  | 3730(2) | 21(1) |
| C(43) | 8049(3)  | 5195(2)  | 2813(2) | 17(1) |
| C(44) | 7745(3)  | 6263(2)  | 1996(2) | 17(1) |
| C(45) | 8232(3)  | 7286(2)  | 2220(2) | 19(1) |
| C(46) | 9251(3)  | 7727(3)  | 1373(3) | 27(1) |
| C(47) | 9685(4)  | 8673(3)  | 1573(3) | 38(1) |
| C(48) | 9124(4)  | 9174(3)  | 2632(3) | 36(1) |
| C(49) | 8112(4)  | 8743(3)  | 3478(3) | 32(1) |
| C(50) | 7662(3)  | 7816(3)  | 3271(3) | 25(1) |
| C(51) | 9681(3)  | 4669(2)  | 2649(2) | 16(1) |
| C(52) | 10185(3) | 4415(2)  | 3574(2) | 19(1) |
| C(53) | 11670(3) | 3911(2)  | 3431(3) | 23(1) |
| C(54) | 12669(3) | 3652(2)  | 2366(3) | 24(1) |
| C(55) | 12182(3) | 3892(2)  | 1432(2) | 21(1) |
| C(56) | 10707(3) | 4401(2)  | 1575(2) | 18(1) |
| C(57) | 3578(3)  | 7328(2)  | 2778(2) | 16(1) |
| C(58) | 4083(3)  | 7232(2)  | 1441(2) | 15(1) |
| C(59) | 2813(3)  | 8640(2)  | 3005(2) | 16(1) |

|       |         |          |         |       |
|-------|---------|----------|---------|-------|
| C(60) | 2130(3) | 9262(3)  | 3986(2) | 20(1) |
| C(61) | 1443(3) | 10503(3) | 3918(2) | 23(1) |
| C(62) | 1459(3) | 11091(2) | 2912(3) | 22(1) |
| C(63) | 2201(3) | 10468(2) | 1879(2) | 19(1) |
| C(64) | 2337(3) | 10928(2) | 769(3)  | 23(1) |
| C(65) | 3079(3) | 10200(3) | -144(2) | 24(1) |
| C(66) | 3703(3) | 8962(2)  | -29(2)  | 20(1) |
| C(67) | 3573(3) | 8492(2)  | 1035(2) | 15(1) |
| C(68) | 2848(3) | 9244(2)  | 1970(2) | 15(1) |
| C(69) | 2639(3) | 6545(3)  | 3455(2) | 25(1) |
| C(70) | 3580(3) | 6360(2)  | 979(2)  | 21(1) |

---



Table 3. Bond lengths [Å] and angles [°] for C35H31BO3.

|             |          |
|-------------|----------|
| O(1)-C(2)   | 1.380(3) |
| O(1)-C(1)   | 1.421(4) |
| O(2)-B(1)   | 1.364(3) |
| O(2)-C(22)  | 1.461(3) |
| O(3)-B(1)   | 1.365(3) |
| O(3)-C(23)  | 1.454(3) |
| B(1)-C(9)   | 1.579(4) |
| C(1)-H(1A)  | 0.9800   |
| C(1)-H(1B)  | 0.9800   |
| C(1)-H(1C)  | 0.9800   |
| C(2)-C(7)   | 1.376(4) |
| C(2)-C(3)   | 1.383(4) |
| C(3)-C(4)   | 1.391(4) |
| C(3)-H(3)   | 0.9500   |
| C(4)-C(5)   | 1.388(4) |
| C(4)-H(4)   | 0.9500   |
| C(5)-C(6)   | 1.393(4) |
| C(5)-C(8)   | 1.533(4) |
| C(6)-C(7)   | 1.407(4) |
| C(6)-H(6)   | 0.9500   |
| C(7)-H(7)   | 0.9500   |
| C(8)-C(16)  | 1.525(3) |
| C(8)-C(9)   | 1.556(3) |
| C(8)-H(8)   | 1.0000   |
| C(9)-C(10)  | 1.524(4) |
| C(9)-H(9)   | 1.0000   |
| C(10)-C(11) | 1.387(4) |
| C(10)-C(15) | 1.391(4) |
| C(11)-C(12) | 1.390(5) |
| C(11)-H(11) | 0.9500   |
| C(12)-C(13) | 1.377(5) |
| C(12)-H(12) | 0.9500   |
| C(13)-C(14) | 1.379(5) |
| C(13)-H(13) | 0.9500   |

|             |          |
|-------------|----------|
| C(14)-C(15) | 1.392(4) |
| C(14)-H(14) | 0.9500   |
| C(15)-H(15) | 0.9500   |
| C(16)-C(21) | 1.386(4) |
| C(16)-C(17) | 1.400(4) |
| C(17)-C(18) | 1.387(4) |
| C(17)-H(17) | 0.9500   |
| C(18)-C(19) | 1.384(4) |
| C(18)-H(18) | 0.9500   |
| C(19)-C(20) | 1.378(5) |
| C(19)-H(19) | 0.9500   |
| C(20)-C(21) | 1.391(4) |
| C(20)-H(20) | 0.9500   |
| C(21)-H(21) | 0.9500   |
| C(22)-C(34) | 1.516(3) |
| C(22)-C(24) | 1.518(3) |
| C(22)-C(23) | 1.588(3) |
| C(23)-C(32) | 1.518(3) |
| C(23)-C(35) | 1.519(3) |
| C(24)-C(25) | 1.370(4) |
| C(24)-C(33) | 1.407(4) |
| C(25)-C(26) | 1.419(4) |
| C(25)-H(25) | 0.9500   |
| C(26)-C(27) | 1.374(4) |
| C(26)-H(26) | 0.9500   |
| C(27)-C(28) | 1.418(4) |
| C(27)-H(27) | 0.9500   |
| C(28)-C(33) | 1.407(4) |
| C(28)-C(29) | 1.417(4) |
| C(29)-C(30) | 1.381(4) |
| C(29)-H(29) | 0.9500   |
| C(30)-C(31) | 1.418(4) |
| C(30)-H(30) | 0.9500   |
| C(31)-C(32) | 1.370(4) |
| C(31)-H(31) | 0.9500   |
| C(32)-C(33) | 1.399(4) |

|              |          |
|--------------|----------|
| C(34)-H(34A) | 0.9800   |
| C(34)-H(34B) | 0.9800   |
| C(34)-H(34C) | 0.9800   |
| C(35)-H(35A) | 0.9800   |
| C(35)-H(35B) | 0.9800   |
| C(35)-H(35C) | 0.9800   |
| O(4)-C(37)   | 1.366(3) |
| O(4)-C(36)   | 1.422(4) |
| O(5)-B(2)    | 1.360(3) |
| O(5)-C(57)   | 1.452(3) |
| O(6)-B(2)    | 1.362(4) |
| O(6)-C(58)   | 1.455(3) |
| B(2)-C(44)   | 1.581(4) |
| C(36)-H(36A) | 0.9800   |
| C(36)-H(36B) | 0.9800   |
| C(36)-H(36C) | 0.9800   |
| C(37)-C(42)  | 1.383(4) |
| C(37)-C(38)  | 1.392(4) |
| C(38)-C(39)  | 1.384(4) |
| C(38)-H(38)  | 0.9500   |
| C(39)-C(40)  | 1.397(4) |
| C(39)-H(39)  | 0.9500   |
| C(40)-C(41)  | 1.387(4) |
| C(40)-C(43)  | 1.526(4) |
| C(41)-C(42)  | 1.393(4) |
| C(41)-H(41)  | 0.9500   |
| C(42)-H(42)  | 0.9500   |
| C(43)-C(51)  | 1.523(4) |
| C(43)-C(44)  | 1.555(3) |
| C(43)-H(43)  | 1.0000   |
| C(44)-C(45)  | 1.524(4) |
| C(44)-H(44)  | 1.0000   |
| C(45)-C(50)  | 1.390(4) |
| C(45)-C(46)  | 1.392(4) |
| C(46)-C(47)  | 1.396(5) |
| C(46)-H(46)  | 0.9500   |

|             |          |
|-------------|----------|
| C(47)-C(48) | 1.385(6) |
| C(47)-H(47) | 0.9500   |
| C(48)-C(49) | 1.381(5) |
| C(48)-H(48) | 0.9500   |
| C(49)-C(50) | 1.390(4) |
| C(49)-H(49) | 0.9500   |
| C(50)-H(50) | 0.9500   |
| C(51)-C(52) | 1.388(4) |
| C(51)-C(56) | 1.401(4) |
| C(52)-C(53) | 1.391(4) |
| C(52)-H(52) | 0.9500   |
| C(53)-C(54) | 1.382(4) |
| C(53)-H(53) | 0.9500   |
| C(54)-C(55) | 1.389(4) |
| C(54)-H(54) | 0.9500   |
| C(55)-C(56) | 1.382(4) |
| C(55)-H(55) | 0.9500   |
| C(56)-H(56) | 0.9500   |
| C(57)-C(59) | 1.517(4) |
| C(57)-C(69) | 1.519(3) |
| C(57)-C(58) | 1.593(3) |
| C(58)-C(67) | 1.508(4) |
| C(58)-C(70) | 1.523(3) |
| C(59)-C(60) | 1.367(4) |
| C(59)-C(68) | 1.406(4) |
| C(60)-C(61) | 1.424(4) |
| C(60)-H(60) | 0.9500   |
| C(61)-C(62) | 1.370(4) |
| C(61)-H(61) | 0.9500   |
| C(62)-C(63) | 1.423(4) |
| C(62)-H(62) | 0.9500   |
| C(63)-C(68) | 1.401(4) |
| C(63)-C(64) | 1.416(4) |
| C(64)-C(65) | 1.370(4) |
| C(64)-H(64) | 0.9500   |
| C(65)-C(66) | 1.416(4) |

|              |          |
|--------------|----------|
| C(65)-H(65)  | 0.9500   |
| C(66)-C(67)  | 1.369(4) |
| C(66)-H(66)  | 0.9500   |
| C(67)-C(68)  | 1.406(4) |
| C(69)-H(69A) | 0.9800   |
| C(69)-H(69B) | 0.9800   |
| C(69)-H(69C) | 0.9800   |
| C(70)-H(70A) | 0.9800   |
| C(70)-H(70B) | 0.9800   |
| C(70)-H(70C) | 0.9800   |

|                  |            |
|------------------|------------|
| C(2)-O(1)-C(1)   | 117.9(2)   |
| B(1)-O(2)-C(22)  | 108.67(19) |
| B(1)-O(3)-C(23)  | 108.5(2)   |
| O(2)-B(1)-O(3)   | 114.6(2)   |
| O(2)-B(1)-C(9)   | 123.2(2)   |
| O(3)-B(1)-C(9)   | 122.2(2)   |
| O(1)-C(1)-H(1A)  | 109.5      |
| O(1)-C(1)-H(1B)  | 109.5      |
| H(1A)-C(1)-H(1B) | 109.5      |
| O(1)-C(1)-H(1C)  | 109.5      |
| H(1A)-C(1)-H(1C) | 109.5      |
| H(1B)-C(1)-H(1C) | 109.5      |
| C(7)-C(2)-O(1)   | 125.0(3)   |
| C(7)-C(2)-C(3)   | 119.7(3)   |
| O(1)-C(2)-C(3)   | 115.3(3)   |
| C(2)-C(3)-C(4)   | 120.2(3)   |
| C(2)-C(3)-H(3)   | 119.9      |
| C(4)-C(3)-H(3)   | 119.9      |
| C(5)-C(4)-C(3)   | 121.7(3)   |
| C(5)-C(4)-H(4)   | 119.1      |
| C(3)-C(4)-H(4)   | 119.1      |
| C(4)-C(5)-C(6)   | 117.2(3)   |
| C(4)-C(5)-C(8)   | 123.1(2)   |
| C(6)-C(5)-C(8)   | 119.7(2)   |
| C(5)-C(6)-C(7)   | 121.6(3)   |

|                   |            |
|-------------------|------------|
| C(5)-C(6)-H(6)    | 119.2      |
| C(7)-C(6)-H(6)    | 119.2      |
| C(2)-C(7)-C(6)    | 119.6(3)   |
| C(2)-C(7)-H(7)    | 120.2      |
| C(6)-C(7)-H(7)    | 120.2      |
| C(16)-C(8)-C(5)   | 110.7(2)   |
| C(16)-C(8)-C(9)   | 111.64(19) |
| C(5)-C(8)-C(9)    | 112.7(2)   |
| C(16)-C(8)-H(8)   | 107.1      |
| C(5)-C(8)-H(8)    | 107.1      |
| C(9)-C(8)-H(8)    | 107.1      |
| C(10)-C(9)-C(8)   | 112.8(2)   |
| C(10)-C(9)-B(1)   | 110.5(2)   |
| C(8)-C(9)-B(1)    | 110.2(2)   |
| C(10)-C(9)-H(9)   | 107.7      |
| C(8)-C(9)-H(9)    | 107.7      |
| B(1)-C(9)-H(9)    | 107.7      |
| C(11)-C(10)-C(15) | 117.7(3)   |
| C(11)-C(10)-C(9)  | 121.1(2)   |
| C(15)-C(10)-C(9)  | 121.2(2)   |
| C(10)-C(11)-C(12) | 121.1(3)   |
| C(10)-C(11)-H(11) | 119.5      |
| C(12)-C(11)-H(11) | 119.5      |
| C(13)-C(12)-C(11) | 120.6(3)   |
| C(13)-C(12)-H(12) | 119.7      |
| C(11)-C(12)-H(12) | 119.7      |
| C(12)-C(13)-C(14) | 119.3(3)   |
| C(12)-C(13)-H(13) | 120.4      |
| C(14)-C(13)-H(13) | 120.4      |
| C(13)-C(14)-C(15) | 120.2(3)   |
| C(13)-C(14)-H(14) | 119.9      |
| C(15)-C(14)-H(14) | 119.9      |
| C(10)-C(15)-C(14) | 121.2(3)   |
| C(10)-C(15)-H(15) | 119.4      |
| C(14)-C(15)-H(15) | 119.4      |
| C(21)-C(16)-C(17) | 118.5(2)   |

|                   |            |
|-------------------|------------|
| C(21)-C(16)-C(8)  | 120.4(2)   |
| C(17)-C(16)-C(8)  | 121.1(2)   |
| C(18)-C(17)-C(16) | 120.1(2)   |
| C(18)-C(17)-H(17) | 119.9      |
| C(16)-C(17)-H(17) | 119.9      |
| C(19)-C(18)-C(17) | 120.5(3)   |
| C(19)-C(18)-H(18) | 119.7      |
| C(17)-C(18)-H(18) | 119.7      |
| C(20)-C(19)-C(18) | 119.9(3)   |
| C(20)-C(19)-H(19) | 120.0      |
| C(18)-C(19)-H(19) | 120.0      |
| C(19)-C(20)-C(21) | 119.7(3)   |
| C(19)-C(20)-H(20) | 120.1      |
| C(21)-C(20)-H(20) | 120.1      |
| C(16)-C(21)-C(20) | 121.2(3)   |
| C(16)-C(21)-H(21) | 119.4      |
| C(20)-C(21)-H(21) | 119.4      |
| O(2)-C(22)-C(34)  | 107.8(2)   |
| O(2)-C(22)-C(24)  | 111.05(19) |
| C(34)-C(22)-C(24) | 113.2(2)   |
| O(2)-C(22)-C(23)  | 103.62(19) |
| C(34)-C(22)-C(23) | 116.5(2)   |
| C(24)-C(22)-C(23) | 104.3(2)   |
| O(3)-C(23)-C(32)  | 110.7(2)   |
| O(3)-C(23)-C(35)  | 108.1(2)   |
| C(32)-C(23)-C(35) | 112.6(2)   |
| O(3)-C(23)-C(22)  | 104.40(18) |
| C(32)-C(23)-C(22) | 104.6(2)   |
| C(35)-C(23)-C(22) | 116.2(2)   |
| C(25)-C(24)-C(33) | 119.3(2)   |
| C(25)-C(24)-C(22) | 131.9(2)   |
| C(33)-C(24)-C(22) | 108.7(2)   |
| C(24)-C(25)-C(26) | 118.7(2)   |
| C(24)-C(25)-H(25) | 120.6      |
| C(26)-C(25)-H(25) | 120.6      |
| C(27)-C(26)-C(25) | 122.1(2)   |

|                     |          |
|---------------------|----------|
| C(27)-C(26)-H(26)   | 119.0    |
| C(25)-C(26)-H(26)   | 119.0    |
| C(26)-C(27)-C(28)   | 120.4(2) |
| C(26)-C(27)-H(27)   | 119.8    |
| C(28)-C(27)-H(27)   | 119.8    |
| C(33)-C(28)-C(29)   | 116.2(2) |
| C(33)-C(28)-C(27)   | 116.4(2) |
| C(29)-C(28)-C(27)   | 127.4(2) |
| C(30)-C(29)-C(28)   | 120.3(2) |
| C(30)-C(29)-H(29)   | 119.8    |
| C(28)-C(29)-H(29)   | 119.8    |
| C(29)-C(30)-C(31)   | 122.2(2) |
| C(29)-C(30)-H(30)   | 118.9    |
| C(31)-C(30)-H(30)   | 118.9    |
| C(32)-C(31)-C(30)   | 118.2(2) |
| C(32)-C(31)-H(31)   | 120.9    |
| C(30)-C(31)-H(31)   | 120.9    |
| C(31)-C(32)-C(33)   | 119.8(2) |
| C(31)-C(32)-C(23)   | 131.4(2) |
| C(33)-C(32)-C(23)   | 108.7(2) |
| C(32)-C(33)-C(28)   | 123.3(2) |
| C(32)-C(33)-C(24)   | 113.5(2) |
| C(28)-C(33)-C(24)   | 123.1(2) |
| C(22)-C(34)-H(34A)  | 109.5    |
| C(22)-C(34)-H(34B)  | 109.5    |
| H(34A)-C(34)-H(34B) | 109.5    |
| C(22)-C(34)-H(34C)  | 109.5    |
| H(34A)-C(34)-H(34C) | 109.5    |
| H(34B)-C(34)-H(34C) | 109.5    |
| C(23)-C(35)-H(35A)  | 109.5    |
| C(23)-C(35)-H(35B)  | 109.5    |
| H(35A)-C(35)-H(35B) | 109.5    |
| C(23)-C(35)-H(35C)  | 109.5    |
| H(35A)-C(35)-H(35C) | 109.5    |
| H(35B)-C(35)-H(35C) | 109.5    |
| C(37)-O(4)-C(36)    | 117.7(2) |



|                     |          |
|---------------------|----------|
| B(2)-O(5)-C(57)     | 108.8(2) |
| B(2)-O(6)-C(58)     | 108.3(2) |
| O(5)-B(2)-O(6)      | 115.0(2) |
| O(5)-B(2)-C(44)     | 123.6(2) |
| O(6)-B(2)-C(44)     | 121.4(2) |
| O(4)-C(36)-H(36A)   | 109.5    |
| O(4)-C(36)-H(36B)   | 109.5    |
| H(36A)-C(36)-H(36B) | 109.5    |
| O(4)-C(36)-H(36C)   | 109.5    |
| H(36A)-C(36)-H(36C) | 109.5    |
| H(36B)-C(36)-H(36C) | 109.5    |
| O(4)-C(37)-C(42)    | 125.2(3) |
| O(4)-C(37)-C(38)    | 115.6(2) |
| C(42)-C(37)-C(38)   | 119.2(3) |
| C(39)-C(38)-C(37)   | 120.7(3) |
| C(39)-C(38)-H(38)   | 119.6    |
| C(37)-C(38)-H(38)   | 119.6    |
| C(38)-C(39)-C(40)   | 120.9(3) |
| C(38)-C(39)-H(39)   | 119.6    |
| C(40)-C(39)-H(39)   | 119.6    |
| C(41)-C(40)-C(39)   | 117.5(3) |
| C(41)-C(40)-C(43)   | 119.7(2) |
| C(39)-C(40)-C(43)   | 122.7(2) |
| C(40)-C(41)-C(42)   | 122.2(3) |
| C(40)-C(41)-H(41)   | 118.9    |
| C(42)-C(41)-H(41)   | 118.9    |
| C(37)-C(42)-C(41)   | 119.5(2) |
| C(37)-C(42)-H(42)   | 120.3    |
| C(41)-C(42)-H(42)   | 120.3    |
| C(51)-C(43)-C(40)   | 110.7(2) |
| C(51)-C(43)-C(44)   | 111.8(2) |
| C(40)-C(43)-C(44)   | 113.3(2) |
| C(51)-C(43)-H(43)   | 106.9    |
| C(40)-C(43)-H(43)   | 106.9    |
| C(44)-C(43)-H(43)   | 106.9    |
| C(45)-C(44)-C(43)   | 111.4(2) |

|                   |          |
|-------------------|----------|
| C(45)-C(44)-B(2)  | 110.8(2) |
| C(43)-C(44)-B(2)  | 111.6(2) |
| C(45)-C(44)-H(44) | 107.6    |
| C(43)-C(44)-H(44) | 107.6    |
| B(2)-C(44)-H(44)  | 107.6    |
| C(50)-C(45)-C(46) | 117.9(3) |
| C(50)-C(45)-C(44) | 121.1(2) |
| C(46)-C(45)-C(44) | 121.0(3) |
| C(45)-C(46)-C(47) | 121.1(3) |
| C(45)-C(46)-H(46) | 119.5    |
| C(47)-C(46)-H(46) | 119.5    |
| C(48)-C(47)-C(46) | 120.1(3) |
| C(48)-C(47)-H(47) | 120.0    |
| C(46)-C(47)-H(47) | 120.0    |
| C(49)-C(48)-C(47) | 119.3(3) |
| C(49)-C(48)-H(48) | 120.3    |
| C(47)-C(48)-H(48) | 120.3    |
| C(48)-C(49)-C(50) | 120.4(3) |
| C(48)-C(49)-H(49) | 119.8    |
| C(50)-C(49)-H(49) | 119.8    |
| C(49)-C(50)-C(45) | 121.2(3) |
| C(49)-C(50)-H(50) | 119.4    |
| C(45)-C(50)-H(50) | 119.4    |
| C(52)-C(51)-C(56) | 118.1(2) |
| C(52)-C(51)-C(43) | 120.3(2) |
| C(56)-C(51)-C(43) | 121.6(2) |
| C(51)-C(52)-C(53) | 120.6(3) |
| C(51)-C(52)-H(52) | 119.7    |
| C(53)-C(52)-H(52) | 119.7    |
| C(54)-C(53)-C(52) | 120.5(3) |
| C(54)-C(53)-H(53) | 119.7    |
| C(52)-C(53)-H(53) | 119.7    |
| C(53)-C(54)-C(55) | 119.6(3) |
| C(53)-C(54)-H(54) | 120.2    |
| C(55)-C(54)-H(54) | 120.2    |
| C(56)-C(55)-C(54) | 119.8(3) |

|                   |            |
|-------------------|------------|
| C(56)-C(55)-H(55) | 120.1      |
| C(54)-C(55)-H(55) | 120.1      |
| C(55)-C(56)-C(51) | 121.4(3)   |
| C(55)-C(56)-H(56) | 119.3      |
| C(51)-C(56)-H(56) | 119.3      |
| O(5)-C(57)-C(59)  | 110.9(2)   |
| O(5)-C(57)-C(69)  | 108.5(2)   |
| C(59)-C(57)-C(69) | 112.6(2)   |
| O(5)-C(57)-C(58)  | 103.77(19) |
| C(59)-C(57)-C(58) | 104.4(2)   |
| C(69)-C(57)-C(58) | 116.4(2)   |
| O(6)-C(58)-C(67)  | 110.5(2)   |
| O(6)-C(58)-C(70)  | 107.7(2)   |
| C(67)-C(58)-C(70) | 113.1(2)   |
| O(6)-C(58)-C(57)  | 104.19(19) |
| C(67)-C(58)-C(57) | 104.5(2)   |
| C(70)-C(58)-C(57) | 116.6(2)   |
| C(60)-C(59)-C(68) | 119.4(2)   |
| C(60)-C(59)-C(57) | 131.8(2)   |
| C(68)-C(59)-C(57) | 108.8(2)   |
| C(59)-C(60)-C(61) | 118.2(2)   |
| C(59)-C(60)-H(60) | 120.9      |
| C(61)-C(60)-H(60) | 120.9      |
| C(62)-C(61)-C(60) | 122.5(2)   |
| C(62)-C(61)-H(61) | 118.7      |
| C(60)-C(61)-H(61) | 118.7      |
| C(61)-C(62)-C(63) | 120.2(3)   |
| C(61)-C(62)-H(62) | 119.9      |
| C(63)-C(62)-H(62) | 119.9      |
| C(68)-C(63)-C(64) | 116.0(2)   |
| C(68)-C(63)-C(62) | 116.1(3)   |
| C(64)-C(63)-C(62) | 127.9(3)   |
| C(65)-C(64)-C(63) | 120.7(3)   |
| C(65)-C(64)-H(64) | 119.6      |
| C(63)-C(64)-H(64) | 119.6      |
| C(64)-C(65)-C(66) | 122.3(3)   |

|                     |          |
|---------------------|----------|
| C(64)-C(65)-H(65)   | 118.9    |
| C(66)-C(65)-H(65)   | 118.9    |
| C(67)-C(66)-C(65)   | 118.2(2) |
| C(67)-C(66)-H(66)   | 120.9    |
| C(65)-C(66)-H(66)   | 120.9    |
| C(66)-C(67)-C(68)   | 119.5(2) |
| C(66)-C(67)-C(58)   | 131.3(2) |
| C(68)-C(67)-C(58)   | 109.2(2) |
| C(63)-C(68)-C(59)   | 123.6(2) |
| C(63)-C(68)-C(67)   | 123.2(2) |
| C(59)-C(68)-C(67)   | 113.2(2) |
| C(57)-C(69)-H(69A)  | 109.5    |
| C(57)-C(69)-H(69B)  | 109.5    |
| H(69A)-C(69)-H(69B) | 109.5    |
| C(57)-C(69)-H(69C)  | 109.5    |
| H(69A)-C(69)-H(69C) | 109.5    |
| H(69B)-C(69)-H(69C) | 109.5    |
| C(58)-C(70)-H(70A)  | 109.5    |
| C(58)-C(70)-H(70B)  | 109.5    |
| H(70A)-C(70)-H(70B) | 109.5    |
| C(58)-C(70)-H(70C)  | 109.5    |
| H(70A)-C(70)-H(70C) | 109.5    |
| H(70B)-C(70)-H(70C) | 109.5    |

---

Symmetry transformations used to generate equivalent atoms:

Table 4. Anisotropic displacement parameters ( $\text{\AA}^2 \times 10^3$ ) for C<sub>35</sub>H<sub>31</sub>BO<sub>3</sub>. The anisotropic displacement factor exponent takes the form:  $-2\pi^2 [h^2 a^{*2} U^{11} + \dots + 2 h k a^* b^* U^{12}]$

|       | U <sup>11</sup> | U <sup>22</sup> | U <sup>33</sup> | U <sup>23</sup> | U <sup>13</sup> | U <sup>12</sup> |
|-------|-----------------|-----------------|-----------------|-----------------|-----------------|-----------------|
| O(1)  | 33(1)           | 34(1)           | 22(1)           | 4(1)            | -9(1)           | -20(1)          |
| O(2)  | 12(1)           | 18(1)           | 16(1)           | -1(1)           | -4(1)           | 0(1)            |
| O(3)  | 13(1)           | 19(1)           | 15(1)           | 0(1)            | -5(1)           | -2(1)           |
| B(1)  | 15(1)           | 12(1)           | 17(1)           | 1(1)            | -3(1)           | -4(1)           |
| C(1)  | 31(2)           | 29(2)           | 33(2)           | 2(1)            | -12(1)          | -16(1)          |
| C(2)  | 21(1)           | 26(1)           | 26(1)           | 6(1)            | -14(1)          | -10(1)          |
| C(3)  | 25(1)           | 30(2)           | 19(1)           | 2(1)            | -6(1)           | -10(1)          |
| C(4)  | 22(1)           | 21(1)           | 18(1)           | 1(1)            | -8(1)           | -6(1)           |
| C(5)  | 16(1)           | 17(1)           | 20(1)           | 1(1)            | -10(1)          | -2(1)           |
| C(6)  | 20(1)           | 29(2)           | 23(1)           | -6(1)           | -2(1)           | -9(1)           |
| C(7)  | 25(1)           | 24(1)           | 29(1)           | -6(1)           | -9(1)           | -8(1)           |
| C(8)  | 14(1)           | 17(1)           | 13(1)           | -1(1)           | -4(1)           | -2(1)           |
| C(9)  | 14(1)           | 16(1)           | 13(1)           | 0(1)            | -5(1)           | -2(1)           |
| C(10) | 11(1)           | 13(1)           | 24(1)           | 2(1)            | -9(1)           | 2(1)            |
| C(11) | 31(2)           | 29(2)           | 25(1)           | 1(1)            | -14(1)          | -9(1)           |
| C(12) | 42(2)           | 34(2)           | 44(2)           | 4(1)            | -28(2)          | -19(2)          |
| C(13) | 23(2)           | 29(2)           | 47(2)           | 11(1)           | -20(1)          | -12(1)          |
| C(14) | 18(1)           | 26(1)           | 33(2)           | 5(1)            | -4(1)           | -6(1)           |
| C(15) | 22(1)           | 19(1)           | 24(1)           | -2(1)           | -5(1)           | -4(1)           |
| C(16) | 15(1)           | 9(1)            | 18(1)           | -1(1)           | -6(1)           | -2(1)           |
| C(17) | 18(1)           | 13(1)           | 18(1)           | -4(1)           | -5(1)           | -1(1)           |
| C(18) | 27(2)           | 15(1)           | 28(1)           | -4(1)           | -17(1)          | -2(1)           |
| C(19) | 16(1)           | 14(1)           | 46(2)           | -4(1)           | -16(1)          | -1(1)           |
| C(20) | 14(1)           | 17(1)           | 36(2)           | -3(1)           | -3(1)           | -5(1)           |
| C(21) | 20(1)           | 16(1)           | 21(1)           | 0(1)            | -4(1)           | -5(1)           |
| C(22) | 11(1)           | 14(1)           | 18(1)           | 0(1)            | -5(1)           | -2(1)           |
| C(23) | 11(1)           | 16(1)           | 17(1)           | -1(1)           | -4(1)           | -3(1)           |
| C(24) | 11(1)           | 13(1)           | 19(1)           | 0(1)            | -6(1)           | -3(1)           |
| C(25) | 15(1)           | 18(1)           | 18(1)           | -2(1)           | -6(1)           | -5(1)           |
| C(26) | 24(1)           | 23(1)           | 23(1)           | 7(1)            | -12(1)          | -9(1)           |
| C(27) | 22(1)           | 17(1)           | 27(1)           | 5(1)            | -12(1)          | -6(1)           |

|       |       |       |       |        |        |        |
|-------|-------|-------|-------|--------|--------|--------|
| C(28) | 15(1) | 13(1) | 27(1) | 1(1)   | -10(1) | -5(1)  |
| C(29) | 17(1) | 13(1) | 31(1) | -5(1)  | -10(1) | -2(1)  |
| C(30) | 16(1) | 18(1) | 27(1) | -10(1) | -5(1)  | -2(1)  |
| C(31) | 14(1) | 22(1) | 18(1) | -5(1)  | -3(1)  | -5(1)  |
| C(32) | 11(1) | 15(1) | 19(1) | -1(1)  | -6(1)  | -5(1)  |
| C(33) | 13(1) | 14(1) | 20(1) | -2(1)  | -8(1)  | -6(1)  |
| C(34) | 24(1) | 17(1) | 23(1) | -4(1)  | -7(1)  | -7(1)  |
| C(35) | 18(1) | 20(1) | 27(1) | 2(1)   | -3(1)  | -7(1)  |
| O(4)  | 21(1) | 26(1) | 30(1) | -2(1)  | -7(1)  | -11(1) |
| O(5)  | 16(1) | 23(1) | 16(1) | 0(1)   | -7(1)  | -2(1)  |
| O(6)  | 13(1) | 19(1) | 17(1) | -3(1)  | -5(1)  | -1(1)  |
| B(2)  | 18(1) | 16(1) | 16(1) | -1(1)  | -5(1)  | -5(1)  |
| C(36) | 24(2) | 27(2) | 38(2) | 4(1)   | -7(1)  | -11(1) |
| C(37) | 11(1) | 22(1) | 23(1) | 0(1)   | -7(1)  | -3(1)  |
| C(38) | 20(1) | 35(2) | 18(1) | -7(1)  | -4(1)  | -12(1) |
| C(39) | 20(1) | 33(2) | 16(1) | -3(1)  | -1(1)  | -12(1) |
| C(40) | 10(1) | 20(1) | 17(1) | -2(1)  | -6(1)  | 1(1)   |
| C(41) | 20(1) | 24(1) | 15(1) | -3(1)  | -6(1)  | -2(1)  |
| C(42) | 19(1) | 23(1) | 18(1) | 4(1)   | -6(1)  | -6(1)  |
| C(43) | 17(1) | 18(1) | 14(1) | -3(1)  | -5(1)  | -2(1)  |
| C(44) | 14(1) | 20(1) | 13(1) | 0(1)   | -5(1)  | 0(1)   |
| C(45) | 12(1) | 20(1) | 24(1) | 2(1)   | -9(1)  | 1(1)   |
| C(46) | 17(1) | 28(2) | 32(2) | 6(1)   | -9(1)  | -3(1)  |
| C(47) | 21(2) | 34(2) | 59(2) | 15(2)  | -15(2) | -11(1) |
| C(48) | 26(2) | 25(2) | 66(2) | -4(2)  | -22(2) | -8(1)  |
| C(49) | 27(2) | 28(2) | 46(2) | -10(1) | -18(1) | -3(1)  |
| C(50) | 21(1) | 26(1) | 28(2) | -3(1)  | -9(1)  | -5(1)  |
| C(51) | 16(1) | 12(1) | 21(1) | -3(1)  | -6(1)  | -4(1)  |
| C(52) | 24(1) | 13(1) | 21(1) | -3(1)  | -10(1) | -4(1)  |
| C(53) | 25(1) | 16(1) | 35(2) | 1(1)   | -19(1) | -6(1)  |
| C(54) | 15(1) | 14(1) | 44(2) | -3(1)  | -12(1) | -3(1)  |
| C(55) | 17(1) | 14(1) | 30(2) | -3(1)  | -3(1)  | -5(1)  |
| C(56) | 19(1) | 15(1) | 20(1) | -2(1)  | -6(1)  | -4(1)  |
| C(57) | 13(1) | 16(1) | 17(1) | 0(1)   | -4(1)  | -5(1)  |
| C(58) | 12(1) | 16(1) | 17(1) | -2(1)  | -6(1)  | -3(1)  |
| C(59) | 10(1) | 18(1) | 21(1) | 0(1)   | -5(1)  | -7(1)  |

|       |       |       |       |        |        |        |
|-------|-------|-------|-------|--------|--------|--------|
| C(60) | 16(1) | 26(1) | 19(1) | -2(1)  | -3(1)  | -9(1)  |
| C(61) | 20(1) | 23(1) | 25(1) | -11(1) | -2(1)  | -6(1)  |
| C(62) | 16(1) | 17(1) | 33(2) | -6(1)  | -5(1)  | -6(1)  |
| C(63) | 15(1) | 16(1) | 28(1) | -2(1)  | -7(1)  | -7(1)  |
| C(64) | 25(1) | 15(1) | 31(2) | 2(1)   | -11(1) | -7(1)  |
| C(65) | 27(2) | 23(1) | 25(1) | 6(1)   | -11(1) | -8(1)  |
| C(66) | 20(1) | 20(1) | 19(1) | -2(1)  | -6(1)  | -5(1)  |
| C(67) | 10(1) | 17(1) | 21(1) | -1(1)  | -6(1)  | -6(1)  |
| C(68) | 12(1) | 17(1) | 19(1) | 0(1)   | -5(1)  | -8(1)  |
| C(69) | 26(1) | 24(1) | 23(1) | 4(1)   | -4(1)  | -12(1) |
| C(70) | 23(1) | 16(1) | 27(1) | -4(1)  | -11(1) | -6(1)  |

---

Table 5. Hydrogen coordinates ( $\times 10^4$ ) and isotropic displacement parameters ( $\text{\AA}^2 \times 10^{-3}$ ) for C35H31BO3.

|        | x     | y     | z     | U(eq) |
|--------|-------|-------|-------|-------|
| H(1A)  | 3564  | 9896  | 7007  | 43    |
| H(1B)  | 5211  | 9886  | 6305  | 43    |
| H(1C)  | 4901  | 9015  | 7373  | 43    |
| H(3)   | 4832  | 6733  | 5048  | 29    |
| H(4)   | 3620  | 5283  | 5683  | 24    |
| H(6)   | 1530  | 6907  | 8682  | 29    |
| H(7)   | 2727  | 8387  | 8036  | 30    |
| H(8)   | 1372  | 4943  | 8504  | 18    |
| H(9)   | 2585  | 3880  | 6311  | 18    |
| H(11)  | 1799  | 2289  | 6046  | 32    |
| H(12)  | 561   | 857   | 6709  | 42    |
| H(13)  | -489  | 590   | 8638  | 37    |
| H(14)  | -301  | 1777  | 9908  | 33    |
| H(15)  | 966   | 3195  | 9249  | 28    |
| H(17)  | 787   | 5567  | 5767  | 21    |
| H(18)  | -1516 | 6338  | 5528  | 26    |
| H(19)  | -3629 | 6750  | 7089  | 29    |
| H(20)  | -3446 | 6394  | 8904  | 28    |
| H(21)  | -1146 | 5638  | 9153  | 23    |
| H(25)  | 5298  | 1803  | 10516 | 20    |
| H(26)  | 6341  | -215  | 10912 | 27    |
| H(27)  | 7706  | -1570 | 9490  | 25    |
| H(29)  | 8931  | -1918 | 7282  | 24    |
| H(30)  | 9215  | -1092 | 5490  | 25    |
| H(31)  | 8122  | 946   | 5202  | 22    |
| H(34A) | 5607  | 4578  | 8429  | 31    |
| H(34B) | 6985  | 3619  | 8678  | 31    |
| H(34C) | 5397  | 3863  | 9605  | 31    |
| H(35A) | 7899  | 3164  | 5580  | 33    |
| H(35B) | 8251  | 3187  | 6725  | 33    |



|        |       |       |      |    |
|--------|-------|-------|------|----|
| H(35C) | 6941  | 4217  | 6456 | 33 |
| H(36A) | 5436  | 707   | 4138 | 45 |
| H(36B) | 4646  | 292   | 3407 | 45 |
| H(36C) | 3977  | 1591  | 3941 | 45 |
| H(38)  | 7199  | 2450  | 1023 | 28 |
| H(39)  | 8145  | 4001  | 1045 | 28 |
| H(41)  | 6334  | 4158  | 4429 | 25 |
| H(42)  | 5386  | 2598  | 4417 | 25 |
| H(43)  | 7580  | 5513  | 3596 | 20 |
| H(44)  | 8338  | 5985  | 1211 | 20 |
| H(46)  | 9658  | 7379  | 648  | 32 |
| H(47)  | 10367 | 8973  | 981  | 45 |
| H(48)  | 9431  | 9807  | 2775 | 44 |
| H(49)  | 7721  | 9083  | 4206 | 38 |
| H(50)  | 6952  | 7540  | 3858 | 30 |
| H(52)  | 9510  | 4588  | 4311 | 22 |
| H(53)  | 12001 | 3743  | 4072 | 27 |
| H(54)  | 13683 | 3311  | 2273 | 29 |
| H(55)  | 12859 | 3706  | 697  | 25 |
| H(56)  | 10383 | 4572  | 931  | 22 |
| H(60)  | 2113  | 8876  | 4694 | 24 |
| H(61)  | 956   | 10941 | 4597 | 28 |
| H(62)  | 972   | 11918 | 2904 | 26 |
| H(64)  | 1910  | 11750 | 656  | 28 |
| H(65)  | 3179  | 10537 | -879 | 29 |
| H(66)  | 4197  | 8471  | -674 | 24 |
| H(69A) | 3182  | 5709  | 3285 | 37 |
| H(69B) | 1735  | 6745  | 3256 | 37 |
| H(69C) | 2394  | 6675  | 4262 | 37 |
| H(70A) | 3967  | 6364  | 154  | 31 |
| H(70B) | 2507  | 6596  | 1218 | 31 |
| H(70C) | 3942  | 5560  | 1270 | 31 |

---

Table 6. Torsion angles [°] for C<sub>35</sub>H<sub>31</sub>BO<sub>3</sub>.

---

|                         |           |
|-------------------------|-----------|
| C(22)-O(2)-B(1)-O(3)    | 3.8(3)    |
| C(22)-O(2)-B(1)-C(9)    | -175.0(2) |
| C(23)-O(3)-B(1)-O(2)    | -1.0(3)   |
| C(23)-O(3)-B(1)-C(9)    | 177.7(2)  |
| C(1)-O(1)-C(2)-C(7)     | 7.0(4)    |
| C(1)-O(1)-C(2)-C(3)     | -172.9(3) |
| C(7)-C(2)-C(3)-C(4)     | 0.2(4)    |
| O(1)-C(2)-C(3)-C(4)     | 180.0(3)  |
| C(2)-C(3)-C(4)-C(5)     | -0.1(4)   |
| C(3)-C(4)-C(5)-C(6)     | -0.4(4)   |
| C(3)-C(4)-C(5)-C(8)     | 176.3(3)  |
| C(4)-C(5)-C(6)-C(7)     | 0.8(4)    |
| C(8)-C(5)-C(6)-C(7)     | -176.0(3) |
| O(1)-C(2)-C(7)-C(6)     | -179.5(3) |
| C(3)-C(2)-C(7)-C(6)     | 0.3(4)    |
| C(5)-C(6)-C(7)-C(2)     | -0.8(4)   |
| C(4)-C(5)-C(8)-C(16)    | -94.0(3)  |
| C(6)-C(5)-C(8)-C(16)    | 82.7(3)   |
| C(4)-C(5)-C(8)-C(9)     | 31.9(3)   |
| C(6)-C(5)-C(8)-C(9)     | -151.5(2) |
| C(16)-C(8)-C(9)-C(10)   | -55.2(3)  |
| C(5)-C(8)-C(9)-C(10)    | 179.4(2)  |
| C(16)-C(8)-C(9)-B(1)    | -179.3(2) |
| C(5)-C(8)-C(9)-B(1)     | 55.3(3)   |
| O(2)-B(1)-C(9)-C(10)    | -69.9(3)  |
| O(3)-B(1)-C(9)-C(10)    | 111.5(3)  |
| O(2)-B(1)-C(9)-C(8)     | 55.5(3)   |
| O(3)-B(1)-C(9)-C(8)     | -123.1(2) |
| C(8)-C(9)-C(10)-C(11)   | 131.5(3)  |
| B(1)-C(9)-C(10)-C(11)   | -104.6(3) |
| C(8)-C(9)-C(10)-C(15)   | -50.6(3)  |
| B(1)-C(9)-C(10)-C(15)   | 73.3(3)   |
| C(15)-C(10)-C(11)-C(12) | -0.6(4)   |
| C(9)-C(10)-C(11)-C(12)  | 177.3(3)  |

|                         |           |
|-------------------------|-----------|
| C(10)-C(11)-C(12)-C(13) | 0.4(5)    |
| C(11)-C(12)-C(13)-C(14) | 0.2(5)    |
| C(12)-C(13)-C(14)-C(15) | -0.6(5)   |
| C(11)-C(10)-C(15)-C(14) | 0.1(4)    |
| C(9)-C(10)-C(15)-C(14)  | -177.8(2) |
| C(13)-C(14)-C(15)-C(10) | 0.5(4)    |
| C(5)-C(8)-C(16)-C(21)   | -114.2(3) |
| C(9)-C(8)-C(16)-C(21)   | 119.3(2)  |
| C(5)-C(8)-C(16)-C(17)   | 64.5(3)   |
| C(9)-C(8)-C(16)-C(17)   | -62.0(3)  |
| C(21)-C(16)-C(17)-C(18) | -0.1(4)   |
| C(8)-C(16)-C(17)-C(18)  | -178.8(2) |
| C(16)-C(17)-C(18)-C(19) | -0.1(4)   |
| C(17)-C(18)-C(19)-C(20) | 0.1(4)    |
| C(18)-C(19)-C(20)-C(21) | 0.2(4)    |
| C(17)-C(16)-C(21)-C(20) | 0.4(4)    |
| C(8)-C(16)-C(21)-C(20)  | 179.1(2)  |
| C(19)-C(20)-C(21)-C(16) | -0.4(4)   |
| B(1)-O(2)-C(22)-C(34)   | 119.5(2)  |
| B(1)-O(2)-C(22)-C(24)   | -116.0(2) |
| B(1)-O(2)-C(22)-C(23)   | -4.5(2)   |
| B(1)-O(3)-C(23)-C(32)   | 110.1(2)  |
| B(1)-O(3)-C(23)-C(35)   | -126.2(2) |
| B(1)-O(3)-C(23)-C(22)   | -1.9(2)   |
| O(2)-C(22)-C(23)-O(3)   | 3.9(2)    |
| C(34)-C(22)-C(23)-O(3)  | -114.3(2) |
| C(24)-C(22)-C(23)-O(3)  | 120.2(2)  |
| O(2)-C(22)-C(23)-C(32)  | -112.5(2) |
| C(34)-C(22)-C(23)-C(32) | 129.4(2)  |
| C(24)-C(22)-C(23)-C(32) | 3.8(2)    |
| O(2)-C(22)-C(23)-C(35)  | 122.8(2)  |
| C(34)-C(22)-C(23)-C(35) | 4.7(3)    |
| C(24)-C(22)-C(23)-C(35) | -120.9(2) |
| O(2)-C(22)-C(24)-C(25)  | -75.1(3)  |
| C(34)-C(22)-C(24)-C(25) | 46.3(4)   |
| C(23)-C(22)-C(24)-C(25) | 173.9(3)  |

|                         |           |
|-------------------------|-----------|
| O(2)-C(22)-C(24)-C(33)  | 108.3(2)  |
| C(34)-C(22)-C(24)-C(33) | -130.3(2) |
| C(23)-C(22)-C(24)-C(33) | -2.7(3)   |
| C(33)-C(24)-C(25)-C(26) | -0.6(4)   |
| C(22)-C(24)-C(25)-C(26) | -176.9(2) |
| C(24)-C(25)-C(26)-C(27) | -0.1(4)   |
| C(25)-C(26)-C(27)-C(28) | 1.0(4)    |
| C(26)-C(27)-C(28)-C(33) | -1.1(4)   |
| C(26)-C(27)-C(28)-C(29) | 176.4(3)  |
| C(33)-C(28)-C(29)-C(30) | -0.9(4)   |
| C(27)-C(28)-C(29)-C(30) | -178.4(3) |
| C(28)-C(29)-C(30)-C(31) | 1.3(4)    |
| C(29)-C(30)-C(31)-C(32) | -0.2(4)   |
| C(30)-C(31)-C(32)-C(33) | -1.2(4)   |
| C(30)-C(31)-C(32)-C(23) | 174.4(2)  |
| O(3)-C(23)-C(32)-C(31)  | 68.4(3)   |
| C(35)-C(23)-C(32)-C(31) | -52.7(4)  |
| C(22)-C(23)-C(32)-C(31) | -179.7(3) |
| O(3)-C(23)-C(32)-C(33)  | -115.6(2) |
| C(35)-C(23)-C(32)-C(33) | 123.2(2)  |
| C(22)-C(23)-C(32)-C(33) | -3.7(3)   |
| C(31)-C(32)-C(33)-C(28) | 1.6(4)    |
| C(23)-C(32)-C(33)-C(28) | -174.9(2) |
| C(31)-C(32)-C(33)-C(24) | 178.7(2)  |
| C(23)-C(32)-C(33)-C(24) | 2.2(3)    |
| C(29)-C(28)-C(33)-C(32) | -0.6(4)   |
| C(27)-C(28)-C(33)-C(32) | 177.2(2)  |
| C(29)-C(28)-C(33)-C(24) | -177.4(2) |
| C(27)-C(28)-C(33)-C(24) | 0.4(4)    |
| C(25)-C(24)-C(33)-C(32) | -176.6(2) |
| C(22)-C(24)-C(33)-C(32) | 0.4(3)    |
| C(25)-C(24)-C(33)-C(28) | 0.5(4)    |
| C(22)-C(24)-C(33)-C(28) | 177.5(2)  |
| C(57)-O(5)-B(2)-O(6)    | -0.1(3)   |
| C(57)-O(5)-B(2)-C(44)   | -179.8(2) |
| C(58)-O(6)-B(2)-O(5)    | 0.3(3)    |

|                         |           |
|-------------------------|-----------|
| C(58)-O(6)-B(2)-C(44)   | -180.0(2) |
| C(36)-O(4)-C(37)-C(42)  | 0.6(4)    |
| C(36)-O(4)-C(37)-C(38)  | -178.2(3) |
| O(4)-C(37)-C(38)-C(39)  | -179.1(3) |
| C(42)-C(37)-C(38)-C(39) | 2.0(4)    |
| C(37)-C(38)-C(39)-C(40) | -0.2(4)   |
| C(38)-C(39)-C(40)-C(41) | -1.7(4)   |
| C(38)-C(39)-C(40)-C(43) | 175.8(3)  |
| C(39)-C(40)-C(41)-C(42) | 1.8(4)    |
| C(43)-C(40)-C(41)-C(42) | -175.8(2) |
| O(4)-C(37)-C(42)-C(41)  | 179.4(3)  |
| C(38)-C(37)-C(42)-C(41) | -1.9(4)   |
| C(40)-C(41)-C(42)-C(37) | 0.0(4)    |
| C(41)-C(40)-C(43)-C(51) | 103.6(3)  |
| C(39)-C(40)-C(43)-C(51) | -73.9(3)  |
| C(41)-C(40)-C(43)-C(44) | -129.9(3) |
| C(39)-C(40)-C(43)-C(44) | 52.7(3)   |
| C(51)-C(43)-C(44)-C(45) | -63.1(3)  |
| C(40)-C(43)-C(44)-C(45) | 170.9(2)  |
| C(51)-C(43)-C(44)-B(2)  | 172.5(2)  |
| C(40)-C(43)-C(44)-B(2)  | 46.5(3)   |
| O(5)-B(2)-C(44)-C(45)   | -72.9(3)  |
| O(6)-B(2)-C(44)-C(45)   | 107.5(3)  |
| O(5)-B(2)-C(44)-C(43)   | 51.9(3)   |
| O(6)-B(2)-C(44)-C(43)   | -127.7(3) |
| C(43)-C(44)-C(45)-C(50) | -58.4(3)  |
| B(2)-C(44)-C(45)-C(50)  | 66.4(3)   |
| C(43)-C(44)-C(45)-C(46) | 122.2(3)  |
| B(2)-C(44)-C(45)-C(46)  | -113.0(3) |
| C(50)-C(45)-C(46)-C(47) | -0.1(4)   |
| C(44)-C(45)-C(46)-C(47) | 179.3(3)  |
| C(45)-C(46)-C(47)-C(48) | 1.3(5)    |
| C(46)-C(47)-C(48)-C(49) | -1.2(5)   |
| C(47)-C(48)-C(49)-C(50) | 0.1(5)    |
| C(48)-C(49)-C(50)-C(45) | 1.1(5)    |
| C(46)-C(45)-C(50)-C(49) | -1.1(4)   |

|                         |           |
|-------------------------|-----------|
| C(44)-C(45)-C(50)-C(49) | 179.5(3)  |
| C(40)-C(43)-C(51)-C(52) | -99.2(3)  |
| C(44)-C(43)-C(51)-C(52) | 133.4(2)  |
| C(40)-C(43)-C(51)-C(56) | 79.3(3)   |
| C(44)-C(43)-C(51)-C(56) | -48.1(3)  |
| C(56)-C(51)-C(52)-C(53) | 0.1(4)    |
| C(43)-C(51)-C(52)-C(53) | 178.6(2)  |
| C(51)-C(52)-C(53)-C(54) | -0.1(4)   |
| C(52)-C(53)-C(54)-C(55) | -0.4(4)   |
| C(53)-C(54)-C(55)-C(56) | 0.8(4)    |
| C(54)-C(55)-C(56)-C(51) | -0.9(4)   |
| C(52)-C(51)-C(56)-C(55) | 0.4(4)    |
| C(43)-C(51)-C(56)-C(55) | -178.1(2) |
| B(2)-O(5)-C(57)-C(59)   | -111.6(2) |
| B(2)-O(5)-C(57)-C(69)   | 124.3(2)  |
| B(2)-O(5)-C(57)-C(58)   | -0.1(3)   |
| B(2)-O(6)-C(58)-C(67)   | 111.3(2)  |
| B(2)-O(6)-C(58)-C(70)   | -124.7(2) |
| B(2)-O(6)-C(58)-C(57)   | -0.4(3)   |
| O(5)-C(57)-C(58)-O(6)   | 0.3(2)    |
| C(59)-C(57)-C(58)-O(6)  | 116.5(2)  |
| C(69)-C(57)-C(58)-O(6)  | -118.8(2) |
| O(5)-C(57)-C(58)-C(67)  | -115.7(2) |
| C(59)-C(57)-C(58)-C(67) | 0.5(2)    |
| C(69)-C(57)-C(58)-C(67) | 125.2(2)  |
| O(5)-C(57)-C(58)-C(70)  | 118.7(2)  |
| C(59)-C(57)-C(58)-C(70) | -125.1(2) |
| C(69)-C(57)-C(58)-C(70) | -0.3(3)   |
| O(5)-C(57)-C(59)-C(60)  | -70.2(3)  |
| C(69)-C(57)-C(59)-C(60) | 51.5(4)   |
| C(58)-C(57)-C(59)-C(60) | 178.6(3)  |
| O(5)-C(57)-C(59)-C(68)  | 111.2(2)  |
| C(69)-C(57)-C(59)-C(68) | -127.1(2) |
| C(58)-C(57)-C(59)-C(68) | 0.0(3)    |
| C(68)-C(59)-C(60)-C(61) | 1.5(4)    |
| C(57)-C(59)-C(60)-C(61) | -177.0(2) |

|                         |           |
|-------------------------|-----------|
| C(59)-C(60)-C(61)-C(62) | -0.7(4)   |
| C(60)-C(61)-C(62)-C(63) | -1.1(4)   |
| C(61)-C(62)-C(63)-C(68) | 2.0(4)    |
| C(61)-C(62)-C(63)-C(64) | -179.6(3) |
| C(68)-C(63)-C(64)-C(65) | -0.7(4)   |
| C(62)-C(63)-C(64)-C(65) | -179.2(3) |
| C(63)-C(64)-C(65)-C(66) | 1.9(4)    |
| C(64)-C(65)-C(66)-C(67) | -1.1(4)   |
| C(65)-C(66)-C(67)-C(68) | -0.7(4)   |
| C(65)-C(66)-C(67)-C(58) | 178.9(2)  |
| O(6)-C(58)-C(67)-C(66)  | 68.0(3)   |
| C(70)-C(58)-C(67)-C(66) | -52.8(4)  |
| C(57)-C(58)-C(67)-C(66) | 179.5(3)  |
| O(6)-C(58)-C(67)-C(68)  | -112.4(2) |
| C(70)-C(58)-C(67)-C(68) | 126.8(2)  |
| C(57)-C(58)-C(67)-C(68) | -0.9(3)   |
| C(64)-C(63)-C(68)-C(59) | -179.8(2) |
| C(62)-C(63)-C(68)-C(59) | -1.2(4)   |
| C(64)-C(63)-C(68)-C(67) | -1.1(4)   |
| C(62)-C(63)-C(68)-C(67) | 177.5(2)  |
| C(60)-C(59)-C(68)-C(63) | -0.6(4)   |
| C(57)-C(59)-C(68)-C(63) | 178.2(2)  |
| C(60)-C(59)-C(68)-C(67) | -179.4(2) |
| C(57)-C(59)-C(68)-C(67) | -0.6(3)   |
| C(66)-C(67)-C(68)-C(63) | 1.8(4)    |
| C(58)-C(67)-C(68)-C(63) | -177.9(2) |
| C(66)-C(67)-C(68)-C(59) | -179.4(2) |
| C(58)-C(67)-C(68)-C(59) | 1.0(3)    |

---

Symmetry transformations used to generate equivalent atoms:
